# Supplementary material for: Ubiquitome profiling reveals a regulatory pattern of UPL3 with UBP12 on metabolic-leaf senescence
Source: Life Sci Alliance. 2022 Aug 4;5(12):e202201492. doi: 10.26508/lsa.202201492 (PMC9354775; doi:10.26508/lsa.202201492)
Supplement: Supplementary file 6 [file LSA-2022-01492_Supplemental_Data_5.xlsx]

## Sheet: Sheet1
Supplementary Dataset S5 Differentially accumulation protein of upl3-WT col-0
Protein accession	Protein description	B3/A1 Ratio	Regulated Type	Gene name	Sequence coverage [%]	Mol. weight [kDa]	Score	MS/MS Counts	Peptides	Unique peptides	MS/MS Count A1	MS/MS Count B3	MS/MS Count C1	Peptides A1	Peptides B3	Peptides C1	Unique peptides A1	Unique peptides B3	Unique peptides C1	LFQ intensity A1	LFQ intensity B3	LFQ intensity C1	A1	B3	C1
Q9FJW0	RuvB-like helicase OS=Arabidopsis thaliana GN=At5g67630 PE=2 SV=1	1.897	Up	At5g67630	12.4	52.113	30.072	2	5	5	0	2	0	3	4	3	3	4	3	19920000	37791000	24124000	0.73	1.385	0.884
A0A1P8B3M9	Endonuclease 4 OS=Arabidopsis thaliana GN=ENDO4 PE=4 SV=1	0.588	Down	ENDO4	16.9	36.985	41.612	8	4	4	4	2	2	4	3	3	4	3	3	26245000	15430000	28325000	1.125	0.661	1.214
P42742	Proteasome subunit beta type-1 OS=Arabidopsis thaliana GN=PBF1 PE=1 SV=2	1.317	Up	PBF1	50.2	24.644	98.098	42	10	10	15	12	15	9	10	9	9	10	9	453820000	597650000	432900000	0.917	1.208	0.875
O80448	Pyridoxal 5'-phosphate synthase subunit PDX1.1 OS=Arabidopsis thaliana GN=PDX11 PE=1 SV=1	1.472	Up	PDX11	36.6	32.862	110.9	48	10	6	16	17	15	10	10	10	6	6	6	559140000	822840000	746060000	0.788	1.16	1.052
A0A1I9LT48	Hydroxyproline-rich glycoprotein family protein OS=Arabidopsis thaliana GN=CHUP1 PE=1 SV=1	0.771	Down	CHUP1	8	112.2	88.685	14	7	7	4	6	4	5	7	5	5	7	5	58314000	44977000	50745000	1.136	0.876	0.988
Q9FFH6	Fasciclin-like arabinogalactan protein 13 OS=Arabidopsis thaliana GN=FLA13 PE=1 SV=1	0.823	Down	FLA13	16.6	26.205	33.686	8	4	3	5	1	2	4	2	4	3	1	3	104880000	86337000	83675000	1.145	0.942	0.913
Q949P2	Probable cytosolic oligopeptidase A OS=Arabidopsis thaliana GN=CYOP PE=1 SV=1	1.555	Up	CYOP	21.5	79.043	30.413	7	16	3	2	2	3	16	14	16	3	3	3	26191000	40724000	34471000	0.775	1.205	1.02
A0A1P8BEL5	Nudix hydrolase homolog 2 OS=Arabidopsis thaliana GN=NUDT2 PE=4 SV=1	0.419	Down	NUDT2	20.1	36.795	39.478	8	5	5	5	0	3	5	5	5	5	5	5	70077000	29371000	57066000	1.343	0.563	1.094
Q42512	Protein COLD-REGULATED 15A, chloroplastic OS=Arabidopsis thaliana GN=COR15A PE=1 SV=1	0.536	Down	COR15A	39.6	14.605	85.959	15	10	6	5	6	4	10	10	9	6	6	5	2108400000	1130400000	2094600000	1.186	0.636	1.178
Q570C8	3-ketoacyl-CoA thiolase 5, peroxisomal OS=Arabidopsis thaliana GN=KAT5 PE=2 SV=2	0.633	Down	KAT5	20.6	47.955	50.193	14	8	6	6	3	5	7	6	7	5	4	5	113590000	71971000	83867000	1.265	0.801	0.934
Q9T053	Phospholipase D gamma 1 OS=Arabidopsis thaliana GN=PLDGAMMA1 PE=1 SV=1	1.717	Up	PLDGAMMA1	12.7	95.587	61.949	13	8	8	4	8	1	7	7	6	7	7	6	74496000	127810000	53002000	0.875	1.502	0.623
Q9M9B4	NADH dehydrogenase [ubiquinone] 1 beta subcomplex subunit 10-A OS=Arabidopsis thaliana GN=At1g49140 PE=3 SV=1	1.669	Up	At1g49140	64.5	12.53	14.984	9	5	2	4	3	2	5	5	5	2	2	2	45599000	76152000	94849000	0.632	1.055	1.314
P92974	Ubiquitin-activating enzyme E1 2 OS=Arabidopsis thaliana GN=UBA2 PE=1 SV=1	1.95	Up	UBA2	7.6	119.62	29.275	4	7	5	1	3	0	5	7	5	3	5	3	25970000	50589000	0	0.678	1.322
Q9M214	At3g60450 OS=Arabidopsis thaliana GN=T8B10_110 PE=2 SV=1	1.941	Up	T8B10_110	24.1	30.863	39.276	15	5	5	4	6	5	5	5	4	5	5	4	93813000	182020000	69316000	0.815	1.582	0.602
Q9LU14	GDSL esterase/lipase APG OS=Arabidopsis thaliana GN=APG PE=2 SV=1	0.587	Down	APG	11.9	38.199	42.103	7	3	3	2	2	3	3	3	3	3	3	3	32939000	19300000	50147000	0.965	0.566	1.469
Q9SLJ2	Dehydrin HIRD11 OS=Arabidopsis thaliana GN=HIRD11 PE=1 SV=1	1.422	Up	HIRD11	23.5	10.796	16.877	10	2	2	3	2	5	1	2	2	1	2	2	50633000	72068000	110760000	0.651	0.926	1.423
Q9FGX1	ATP-citrate synthase beta chain protein 2 OS=Arabidopsis thaliana GN=ACLB-2 PE=1 SV=1	1.35	Up	ACLB-2	37	65.827	12.566	3	17	2	1	1	1	15	16	16	2	2	1	13560000	18297000	0	0.851	1.149
Q3EAG0	Germin-like protein 10 OS=Arabidopsis thaliana GN=GLP10 PE=3 SV=1	0.799	Down	GLP10	16.8	20.323	11.261	3	3	2	1	0	2	3	3	3	2	2	2	17640000	14096000	19657000	1.03	0.823	1.147
Q8W4K6	At4g13350 OS=Arabidopsis thaliana GN=NIG PE=1 SV=1	1.614	Up	NIG	15.6	65.026	46.111	12	7	7	4	5	3	6	7	6	6	7	6	74454000	120230000	68559000	0.849	1.37	0.781
Q9LME7	RNA-binding (RRM/RBD/RNP motifs) family protein OS=Arabidopsis thaliana GN=At1g22330 PE=4 SV=1	0.693	Down	At1g22330	11.3	31.98	20.044	6	3	3	2	2	2	3	2	2	3	2	2	40764000	28220000	31477000	1.217	0.843	0.94
Q9SV55	AFP homolog 2 OS=Arabidopsis thaliana GN=AFPH2 PE=1 SV=1	1.475	Up	AFPH2	16.9	44.937	52.342	3	3	3	1	2	0	3	3	3	3	3	3	45331000	66869000	36292000	0.916	1.351	0.733
F4K0F5	PDI-like 1-4 OS=Arabidopsis thaliana GN=PDIL1-4 PE=3 SV=1	0.674	Down	PDIL1-4	10.7	59.176	51.207	8	5	5	2	2	4	5	4	5	5	4	5	37725000	25424000	36146000	1.14	0.768	1.092
O48646	Probable phospholipid hydroperoxide glutathione peroxidase 6, mitochondrial OS=Arabidopsis thaliana GN=GPX6 PE=2 SV=2	1.393	Up	GPX6	45.3	25.584	58.086	17	8	8	3	7	7	7	8	7	7	8	7	667950000	931070000	620510000	0.903	1.258	0.839
Q8GTR4	Pullulanase 1, chloroplastic OS=Arabidopsis thaliana GN=PU1 PE=1 SV=2	0.738	Down	PU1	16.7	107.07	95.386	31	13	13	11	8	12	12	12	13	12	12	13	195300000	144250000	228440000	1.032	0.762	1.207
A8MRD7	Rubredoxin-like superfamily protein OS=Arabidopsis thaliana GN=At3g15640 PE=4 SV=1	1.346	Up	At3g15640	34.9	19.316	26.07	9	4	2	3	1	5	4	4	4	2	2	2	272280000	366620000	193170000	0.982	1.322	0.696
Q42586	Uridine 5'-monophosphate synthase OS=Arabidopsis thaliana GN=PYRE-F PE=2 SV=2	1.235	Up	PYRE-F	28.2	51.85	127.37	23	11	11	6	9	8	7	10	9	7	10	9	167380000	206780000	204960000	0.867	1.071	1.062
Q9SJE1	Magnesium-chelatase subunit ChlD, chloroplastic OS=Arabidopsis thaliana GN=CHLD PE=1 SV=3	1.539	Up	CHLD	10.4	83.283	42.999	15	6	6	5	6	4	5	5	6	5	5	6	133240000	205050000	191320000	0.755	1.162	1.084
Q9LW76	Ras-related protein RABG3c OS=Arabidopsis thaliana GN=RABG3C PE=2 SV=1	0.497	Down	RABG3C	29.6	22.966	39.982	5	6	2	1	2	2	6	6	6	2	2	2	36622000	18218000	43109000	1.122	0.558	1.32
Q9M2S7	Peptidyl-prolyl cis-trans isomerase FKBP20-1 OS=Arabidopsis thaliana GN=FKBP20-1 PE=1 SV=1	1.346	Up	FKBP20-1	17.4	20.348	19.184	4	3	3	0	3	1	2	3	3	2	3	3	11173000	15026000	11040000	0.9	1.211	0.889
Q9FXD4	Signal recognition particle subunit SRP72 OS=Arabidopsis thaliana GN=At1g67680 PE=1 SV=1	1.305	Up	At1g67680	10.7	73.069	44.553	10	5	5	4	3	3	5	4	4	5	4	4	28122000	36700000	35615000	0.84	1.096	1.064
Q9M879	Stearoyl-[acyl-carrier-protein] 9-desaturase 5, chloroplastic OS=Arabidopsis thaliana GN=S-ACP-DES5 PE=1 SV=1	0.737	Down	S-ACP-DES5	32.8	45.302	75.929	18	11	7	5	5	8	8	8	11	6	5	7	149410000	110120000	126720000	1.16	0.855	0.984
P30186	Proteasome subunit alpha type-7-A OS=Arabidopsis thaliana GN=PAD1 PE=1 SV=1	1.305	Up	PAD1	65.2	27.337	242.59	37	13	5	9	13	15	12	11	12	5	4	4	850670000	1110500000	979860000	0.868	1.133	1
F4IBH5	LETM1-like protein OS=Arabidopsis thaliana GN=LETM2 PE=4 SV=1	1.731	Up	LETM2	8.8	83.56	48.02	7	5	5	1	4	2	3	5	4	3	5	4	17492000	30253000	22568000	0.746	1.291	0.963
Q9SEL6	Vesicle transport v-SNARE 11 OS=Arabidopsis thaliana GN=VTI11 PE=1 SV=2	1.575	Up	VTI11	28.5	24.951	40.482	8	5	5	4	3	1	5	5	5	5	5	5	58219000	91669000	54654000	0.854	1.345	0.802
Q8VZ23	NAD(P)-linked oxidoreductase superfamily protein OS=Arabidopsis thaliana GN=At1g04420 PE=2 SV=1	0.62	Down	At1g04420	48.8	46.427	257.95	51	19	19	22	13	16	19	18	17	19	18	17	1456400000	902470000	1166200000	1.239	0.768	0.992
O22785	Pre-mRNA-processing factor 19 homolog 2 OS=Arabidopsis thaliana GN=PRP19B PE=1 SV=3	1.545	Up	PRP19B	23.2	56.727	89.918	19	8	7	6	8	5	8	8	8	7	7	7	107590000	166290000	122650000	0.814	1.258	0.928
Q94AQ8	Photosynthetic NDH subunit of subcomplex B 2, chloroplastic OS=Arabidopsis thaliana GN=PNSB2 PE=2 SV=1	0.791	Down	PNSB2	41.1	38.005	133.52	43	12	12	15	12	16	12	11	12	12	11	12	692620000	547790000	665080000	1.09	0.862	1.047
F4K0E8	4-hydroxy-3-methylbut-2-en-1-yl diphosphate synthase (ferredoxin), chloroplastic OS=Arabidopsis thaliana GN=ISPG PE=1 SV=1	1.542	Up	ISPG	28.3	82.256	155.81	32	19	19	6	14	12	17	18	18	17	18	18	187730000	289570000	270830000	0.753	1.161	1.086
Q9FFD8	At5g16470 OS=Arabidopsis thaliana GN=MQK4.20 PE=1 SV=1	1.648	Up	MQK4.20	27.9	11.239	22.394	6	4	4	3	2	1	4	4	4	4	4	4	39233000	64709000	23065000	0.927	1.528	0.545
Q9M9M3	Defensin-like protein 205 OS=Arabidopsis thaliana GN=At3g05730 PE=3 SV=1	0.766	Down	At3g05730	19.8	9.9741	27.967	10	2	2	3	2	5	2	2	2	2	2	2	108590000	83201000	269520000	0.706	0.541	1.753
Q9LK88	NADPH:quinone oxidoreductase OS=Arabidopsis thaliana GN=NQR PE=1 SV=1	1.67	Up	NQR	54.6	21.556	160.97	27	8	8	11	9	7	8	8	8	8	8	8	565300000	943510000	545590000	0.825	1.378	0.797
Q9SKZ1	Transcription factor Pur-alpha 1 OS=Arabidopsis thaliana GN=PURA1 PE=1 SV=2	1.441	Up	PURA1	51	32.2	137.85	43	13	13	12	15	16	12	12	13	12	12	13	735180000	1060000000	764420000	0.862	1.242	0.896
B3LFA4	Cysteine--tRNA ligase 2, cytoplasmic OS=Arabidopsis thaliana GN=At5g38830 PE=2 SV=1	2.715	Up	At5g38830	22.1	57.841	76.597	17	10	10	3	10	4	7	10	8	7	10	8	43973000	119380000	59488000	0.592	1.607	0.801
O65655	Putative uncharacterized protein AT4g39680 OS=Arabidopsis thaliana GN=At4g39680 PE=1 SV=1	1.575	Up	At4g39680	24.8	69.441	106.36	22	13	13	4	13	5	12	13	10	12	13	10	139630000	219900000	175350000	0.783	1.233	0.983
Q9LV93	ABC transporter F family member 5 OS=Arabidopsis thaliana GN=ABCF5 PE=2 SV=1	0.145	Down	ABCF5	6.1	78	18.209	4	3	3	1	1	2	3	3	3	3	3	3	112670000	16245000	135130000	1.28	0.185	1.535
Q9SMT7	Oxalate--CoA ligase OS=Arabidopsis thaliana GN=AAE3 PE=1 SV=1	1.209	Up	AAE3	40.1	55.544	135.42	56	16	16	18	19	19	15	16	15	15	16	15	1352300000	1635700000	1157900000	0.979	1.184	0.838
Q9FFN4	Beta-galactosidase 6 OS=Arabidopsis thaliana GN=BGAL6 PE=2 SV=1	0.637	Down	BGAL6	46.2	79.758	261.8	62	25	24	28	15	19	25	24	24	24	23	23	1336500000	851210000	1185400000	1.189	0.757	1.054
Q3E870	Succinate dehydrogenase subunit 7B, mitochondrial OS=Arabidopsis thaliana GN=SDH7B PE=1 SV=1	1.228	Up	SDH7B	11	10.86	12.441	4	2	2	1	2	1	2	2	2	2	2	2	15556000	19119000	19429000	0.863	1.06	1.077
Q84W65	SufE-like protein 1, chloroplastic/mitochondrial OS=Arabidopsis thaliana GN=SUFE1 PE=1 SV=2	1.357	Up	SUFE1	47.7	40.833	107.13	32	14	14	11	10	11	14	14	14	14	14	14	285730000	387710000	277770000	0.901	1.223	0.876
Q9SVD7	Ubiquitin-conjugating enzyme E2 variant 1D OS=Arabidopsis thaliana GN=UEV1D PE=1 SV=1	1.434	Up	UEV1D	56.8	16.533	19.057	4	7	3	1	3	0	6	6	7	3	3	3	80816000	115910000	69038000	0.912	1.308	0.779
P48421	Cytochrome P450 83A1 OS=Arabidopsis thaliana GN=CYP83A1 PE=1 SV=2	0.517	Down	CYP83A1	13.3	57.448	34.896	9	5	5	4	2	3	4	3	5	4	3	5	78677000	40690000	82979000	1.166	0.603	1.23
F4K4A6	Tagatose-6-phosphate ketose/aldose isomerase, putative (Mog1/PsbP/DUF1795-like photosystem II reaction center PsbP family protein) OS=Arabidopsis thaliana GN=At5g27390 PE=4 SV=1	0.706	Down	At5g27390	25.7	26.767	36.473	11	5	5	3	3	5	4	4	5	4	4	5	172570000	121800000	161280000	1.136	0.802	1.062
A0A1P8BF93	Beta-D-xylosidase 4 OS=Arabidopsis thaliana GN=XYL4 PE=4 SV=1	2.133	Up	XYL4	20.1	67.273	132.3	28	9	9	7	11	10	9	9	9	9	9	9	172110000	367390000	200460000	0.698	1.489	0.813
Q9SGR6	AT1G76160 protein OS=Arabidopsis thaliana GN=sks5 PE=2 SV=1	0.649	Down	sks5	22.6	60.04	124.12	28	9	5	9	9	10	9	9	8	5	5	4	765960000	496990000	844210000	1.091	0.708	1.202
Q9SYM5	Trifunctional UDP-glucose 4,6-dehydratase/UDP-4-keto-6-deoxy-D-glucose 3,5-epimerase/UDP-4-keto-L-rhamnose-reductase RHM1 OS=Arabidopsis thaliana GN=RHM1 PE=1 SV=1	1.206	Up	RHM1	14.8	75.371	50.865	12	8	7	4	6	2	7	6	8	6	5	7	65865000	79407000	68548000	0.924	1.114	0.962
Q8RUF8	Omega-amidase, chloroplastic OS=Arabidopsis thaliana GN=NLP3 PE=1 SV=1	0.784	Down	NLP3	27.4	40.33	95.99	24	9	9	7	8	9	9	8	8	9	8	8	382850000	300230000	353600000	1.108	0.869	1.023
B9DFI3	AT4G37550 protein OS=Arabidopsis thaliana GN=At4g37550 PE=2 SV=1	0.832	Down	At4g37550	35	49.668	143.89	26	12	10	13	6	7	10	10	9	9	8	7	336540000	280030000	368570000	1.025	0.853	1.122
Q9SNE0	Anthranilate N-hydroxycinnamoyl/benzoyltransferase-like protein OS=Arabidopsis thaliana GN=F11C1_110 PE=4 SV=1	1.345	Up	F11C1_110	17.6	49.805	51.544	15	8	8	4	6	5	7	8	7	7	8	7	69757000	93880000	65432000	0.914	1.229	0.857
Q9SVM9	Protein ECERIFERUM 26 OS=Arabidopsis thaliana GN=CER26 PE=2 SV=1	0.731	Down	CER26	18.5	47.455	42.883	12	6	6	2	5	5	3	6	6	3	6	6	103730000	75855000	62974000	1.283	0.938	0.779
P41088	Chalcone--flavonone isomerase 1 OS=Arabidopsis thaliana GN=CHI1 PE=1 SV=2	0.278	Down	CHI1	27.2	26.595	37.408	10	5	5	3	2	5	4	3	5	4	3	5	50347000	13982000	48035000	1.344	0.373	1.282
Q9FLN4	50S ribosomal protein L27, chloroplastic OS=Arabidopsis thaliana GN=RPL27 PE=2 SV=1	0.343	Down	RPL27	22.7	21.737	20.011	7	3	3	3	1	3	3	2	3	3	2	3	230770000	79255000	183240000	1.404	0.482	1.114
Q9FHI1	MOB kinase activator-like 1A OS=Arabidopsis thaliana GN=MOB1A PE=2 SV=1	2.482	Up	MOB1A	6	24.696	12.722	3	2	2	0	3	0	2	2	2	2	2	2	12296000	30535000	14402000	0.645	1.601	0.755
Q9FLY0	At5g52810 OS=Arabidopsis thaliana GN=MXC20.2 PE=2 SV=1	3.164	Up	MXC20.2	21.8	35.223	55.5	5	4	4	1	4	0	3	4	3	3	4	3	21564000	68266000	21774000	0.58	1.835	0.585
F4I403	12-oxophytodienoate reductase 1 OS=Arabidopsis thaliana GN=OPR1 PE=4 SV=1	0.763	Down	OPR1	43.8	44.015	154.16	45	14	14	18	11	16	14	13	14	14	13	14	435520000	332610000	390300000	1.128	0.861	1.011
F4J2B4	Proteasome component (PCI) domain protein OS=Arabidopsis thaliana GN=At3g02200 PE=1 SV=1	1.563	Up	At3g02200	4.4	41.156	11.229	5	2	2	1	2	2	2	2	2	2	2	2	19602000	30615000	27221000	0.759	1.186	1.055
F4JRT7	Acyl carrier protein 4 OS=Arabidopsis thaliana GN=ACP4 PE=4 SV=1	1.224	Up	ACP4	14.8	15.938	64.574	14	2	2	4	5	5	2	2	2	2	2	2	779080000	953190000	570250000	1.015	1.242	0.743
Q9CAF5	ABC transporter I family member 6, chloroplastic OS=Arabidopsis thaliana GN=ABCI6 PE=1 SV=1	1.351	Up	ABCI6	26	36.931	66.098	22	6	6	7	9	6	6	6	5	6	6	5	222660000	300900000	314940000	0.797	1.077	1.127
Q8LG77	Isocitrate dehydrogenase [NAD] catalytic subunit 6, mitochondrial OS=Arabidopsis thaliana GN=IDH6 PE=1 SV=2	1.274	Up	IDH6	38.8	40.575	60.99	23	11	6	6	7	10	10	11	11	5	6	6	223560000	284720000	207300000	0.937	1.194	0.869
Q9XI11	DPP6 amino-terminal domain protein OS=Arabidopsis thaliana GN=At1g21670 PE=2 SV=1	0.754	Down	At1g21670	45.2	77.288	213.94	64	23	22	23	17	24	22	22	21	21	21	20	802020000	604480000	756650000	1.112	0.838	1.049
Q8H1F4	Coatomer subunit zeta-3 OS=Arabidopsis thaliana GN=At4g08520 PE=2 SV=1	1.76	Up	At4g08520	27.6	19.876	39.557	12	5	5	4	5	3	5	5	3	5	5	3	54495000	95914000	58767000	0.782	1.376	0.843
P56757	ATP synthase subunit alpha, chloroplastic OS=Arabidopsis thaliana GN=atpA PE=1 SV=1	0.725	Down	atpA	56	55.328	323.31	400	25	24	137	117	146	25	25	25	24	24	24	81740000000	59302000000	72742000000	1.147	0.832	1.021
P42825	Chaperone protein dnaJ 2 OS=Arabidopsis thaliana GN=ATJ2 PE=1 SV=2	7.51	Up	ATJ2	23.2	46.438	15.215	3	9	2	0	3	0	7	9	8	1	2	2	10225000	76735000	11300000	0.312	2.343	0.345
P82538	PsbP-like protein 1, chloroplastic OS=Arabidopsis thaliana GN=PPL1 PE=1 SV=1	0.7	Down	PPL1	45.2	25.623	177.42	38	10	10	11	13	14	10	10	9	10	10	9	3417200000	2390600000	2564000000	1.225	0.857	0.919
Q93VH5	AT5g10730/MAJ23_90 OS=Arabidopsis thaliana GN=MAJ23.90 PE=2 SV=1	0.709	Down	MAJ23.90	16.4	31.044	27.02	9	4	4	4	3	2	4	4	4	4	4	4	63185000	44800000	58013000	1.142	0.81	1.048
Q9SUW2	Adenine phosphoribosyltransferase 3 OS=Arabidopsis thaliana GN=APT3 PE=1 SV=1	0.802	Down	APT3	27.3	20.352	42.056	7	4	4	1	3	3	4	4	3	4	4	3	159660000	128080000	97362000	1.244	0.998	0.758
Q9LMU2	Kunitz trypsin inhibitor 2 OS=Arabidopsis thaliana GN=KTI2 PE=2 SV=1	0.658	Down	KTI2	51	22.081	79.663	15	7	7	4	5	6	7	7	6	7	7	6	186080000	122550000	181650000	1.139	0.75	1.112
Q9S6Z7	Bifunctional L-3-cyanoalanine synthase/cysteine synthase D1 OS=Arabidopsis thaliana GN=CYSD1 PE=1 SV=1	0.7	Down	CYSD1	28.7	34.294	46.993	13	8	5	5	3	5	8	7	8	5	4	5	117520000	82303000	109450000	1.14	0.798	1.062
Q9CAT7	Nascent polypeptide-associated complex subunit beta OS=Arabidopsis thaliana GN=At1g73230 PE=2 SV=1	1.306	Up	At1g73230	46.1	18.004	88.664	10	6	4	4	6	0	6	6	4	4	4	2	292260000	381800000	209440000	0.992	1.296	0.711
O22797	Glycolipid transfer protein 1 OS=Arabidopsis thaliana GN=GLTP1 PE=2 SV=1	3.246	Up	GLTP1	8.4	22.74	11.62	3	2	2	1	1	1	2	2	1	2	2	1	18397000	59761000	0	0.471	1.529
Q9FVR9	FAD/NAD(P)-binding oxidoreductase family protein OS=Arabidopsis thaliana GN=At1g57770 PE=2 SV=1	0.821	Down	At1g57770	12	61.723	36.288	9	5	5	5	2	2	5	4	4	5	4	4	113140000	92801000	97140000	1.12	0.919	0.962
O22247	At2g47640 OS=Arabidopsis thaliana GN=F26K9_270 PE=2 SV=1	1.253	Up	F26K9_270	18.5	12.507	20.104	6	2	2	2	2	2	2	2	2	2	2	2	23194000	29066000	25929000	0.89	1.115	0.995
Q9ZUC1	NADPH-dependent alkenal/one oxidoreductase, chloroplastic OS=Arabidopsis thaliana GN=AOR PE=1 SV=2	0.704	Down	AOR	55.2	40.986	238.94	66	19	19	23	20	23	18	16	19	18	16	19	4705800000	3310900000	4432300000	1.134	0.798	1.068
Q9LFT3	Glycosyl hydrolase family 81 protein OS=Arabidopsis thaliana GN=At5g15870 PE=4 SV=1	2.527	Up	At5g15870	3.8	82.872	14.115	2	2	2	0	2	0	2	2	1	2	2	1	7038800	17796000	0	0.567	1.433
Q9LXJ0	Cell division protein FtsZ homolog 2-2, chloroplastic OS=Arabidopsis thaliana GN=FTSZ2-2 PE=1 SV=1	0.74	Down	FTSZ2-2	38.5	50.317	59.626	11	10	5	3	3	5	10	9	10	5	4	5	97650000	72339000	115110000	1.028	0.761	1.211
Q9SFX3	Dolichyl-diphosphooligosaccharide--protein glycosyltransferase subunit 1A OS=Arabidopsis thaliana GN=OST1A PE=2 SV=1	1.906	Up	OST1A	6.4	68.641	29.518	4	4	4	0	3	1	2	4	4	2	4	4	16167000	30830000	23238000	0.691	1.317	0.993
Q9CAR7	Hypersensitive-induced response protein 2 OS=Arabidopsis thaliana GN=HIR2 PE=1 SV=1	1.786	Up	HIR2	47.9	31.405	89.267	23	12	10	9	9	5	12	12	10	10	10	8	341040000	609310000	308750000	0.813	1.452	0.736
Q67YI9	Clathrin interactor EPSIN 2 OS=Arabidopsis thaliana GN=EPSIN2 PE=1 SV=1	1.304	Up	EPSIN2	6.4	95.477	77.018	10	5	5	4	2	4	5	5	5	5	5	5	99255000	129370000	101460000	0.902	1.176	0.922
Q8GWE1	Ubiquitin carboxyl-terminal hydrolase 3 OS=Arabidopsis thaliana GN=UCH3 PE=2 SV=1	2.11	Up	UCH3	11.5	25.712	13.353	4	2	2	2	1	1	2	2	1	2	2	1	8611500	18169000	0	0.643	1.357
Q9LFN6	DEAD-box ATP-dependent RNA helicase 56 OS=Arabidopsis thaliana GN=RH56 PE=1 SV=2	1.81	Up	RH56	46.6	48.337	136.66	25	15	15	7	13	5	13	15	10	13	15	10	275260000	498590000	263930000	0.796	1.441	0.763
Q9ZQ91	Probable carboxylesterase 7 OS=Arabidopsis thaliana GN=CXE7 PE=2 SV=1	1.379	Up	CXE7	14.4	34.749	23.797	7	4	4	2	3	2	4	4	4	4	4	4	50009000	68996000	53713000	0.869	1.198	0.933
A0A1P8B3U2	Glycosyl hydrolase superfamily protein OS=Arabidopsis thaliana GN=At4g16260 PE=3 SV=1	0.567	Down	At4g16260	19.4	34.653	70.085	12	6	6	5	3	4	6	6	6	6	6	6	254300000	144040000	188350000	1.3	0.737	0.963
Q8LBP6	At5g08410 OS=Arabidopsis thaliana GN=FTRA2 PE=2 SV=1	1.237	Up	FTRA2	39.7	20.146	103.38	33	7	7	11	12	10	7	7	7	7	7	7	605470000	749160000	501210000	0.979	1.211	0.81
P16127	Magnesium-chelatase subunit ChlI-1, chloroplastic OS=Arabidopsis thaliana GN=CHLI1 PE=1 SV=1	1.459	Up	CHLI1	45	46.269	176.04	57	18	10	18	22	17	16	17	16	8	9	8	1122700000	1638800000	1408300000	0.808	1.179	1.013
P0DKC4	Phosphoglycolate phosphatase 1B, chloroplastic OS=Arabidopsis thaliana GN=PGLP1B PE=1 SV=1	0.75	Down	PGLP1B	64.4	39.761	323.31	120	20	19	36	42	42	20	20	20	19	19	19	9531200000	7148500000	8573100000	1.132	0.849	1.018
Q9M7T0	Peroxiredoxin-2F, mitochondrial OS=Arabidopsis thaliana GN=PRXIIF PE=1 SV=2	1.205	Up	PRXIIF	59.7	21.445	113.34	30	12	12	9	12	9	11	12	12	11	12	12	1289300000	1554000000	1117500000	0.977	1.177	0.846
A0A1I9LQB3	Carbonic anhydrase OS=Arabidopsis thaliana GN=CA1 PE=1 SV=1	0.724	Down	CA1	81.5	28.198	323.31	241	21	3	84	76	81	21	20	20	3	3	3	49373000000	35735000000	44386000000	1.144	0.828	1.028
Q9ZQ87	Expressed protein OS=Arabidopsis thaliana GN=At2g03510 PE=2 SV=2	1.76	Up	At2g03510	22.2	40.596	62.958	15	8	8	3	10	2	7	8	7	7	8	7	110040000	193690000	110530000	0.797	1.403	0.8
P93303	ATP synthase protein YMF19 OS=Arabidopsis thaliana GN=YMF19 PE=1 SV=1	0.786	Down	YMF19	36.1	18.211	43.436	19	6	6	7	4	8	6	6	6	6	6	6	373350000	293460000	350920000	1.101	0.865	1.034
P83755	Photosystem II protein D1 OS=Arabidopsis thaliana GN=psbA PE=1 SV=2	0.686	Down	psbA	26.3	38.936	247.58	101	8	8	39	31	31	8	7	8	8	7	8	22909000000	15717000000	20221000000	1.168	0.801	1.031
F4JNE1	Poly(U)-specific endoribonuclease-B protein OS=Arabidopsis thaliana GN=At4g17100 PE=4 SV=2	0.787	Down	At4g17100	46.8	35.951	163.72	22	11	11	10	5	7	10	9	10	10	9	10	151670000	119420000	153910000	1.071	0.843	1.086
Q39241	Thioredoxin H5 OS=Arabidopsis thaliana GN=TRX5 PE=1 SV=1	3.139	Up	TRX5	54.2	13.122	190.05	27	6	6	9	11	7	6	6	6	6	6	6	470540000	1475900000	408710000	0.599	1.88	0.521
Q8VY88	Protein LHCP TRANSLOCATION DEFECT OS=Arabidopsis thaliana GN=LTD PE=1 SV=1	1.635	Up	LTD	14.9	19.189	15.403	4	2	2	2	2	0	2	2	1	2	2	1	44980000	73617000	0	0.759	1.241
F4HXD2	Aldehyde dehydrogenase 10A8 OS=Arabidopsis thaliana GN=ALDH10A8 PE=3 SV=1	0.815	Down	ALDH10A8	37.5	53.977	186.59	46	12	12	14	18	14	12	11	12	12	11	12	814410000	663970000	689660000	1.127	0.919	0.954
A0A1R7T390	Golgi-localized GRIP domain-containing protein OS=Arabidopsis thaliana GN=ATGRIP PE=4 SV=1	1.441	Up	ATGRIP	7.7	83.624	36.952	10	5	5	2	6	2	3	5	4	3	5	4	20545000	29637000	22370000	0.85	1.225	0.925
Q38900	Peptidyl-prolyl cis-trans isomerase CYP19-1 OS=Arabidopsis thaliana GN=CYP19-1 PE=1 SV=1	1.269	Up	CYP19-1	46.2	18.492	110.11	24	8	5	8	8	8	8	7	8	5	4	5	1427000000	1810700000	1247600000	0.954	1.211	0.834
F4JJ15	Dynamin-related protein 3A OS=Arabidopsis thaliana GN=DRP3A PE=3 SV=1	1.264	Up	DRP3A	16.9	89.754	84.93	21	13	7	7	7	7	10	12	12	4	6	6	93235000	117790000	89960000	0.929	1.174	0.897
A0A1P8B9Q7	Transcription regulator NOT2/NOT3/NOT5 family protein OS=Arabidopsis thaliana GN=MRG7.19 PE=1 SV=1	1.43	Up	MRG7.19	6.2	89.982	41.303	5	3	3	3	2	0	3	3	3	3	3	3	17474000	24975000	16159000	0.894	1.278	0.827
Q9C5C5	Thioredoxin-like 4, chloroplastic OS=Arabidopsis thaliana GN=At1g07700 PE=2 SV=1	1.56	Up	At1g07700	29.4	23.011	80.363	16	5	5	6	5	5	5	5	5	5	5	5	127460000	198760000	141150000	0.818	1.276	0.906
F4JSM3	Non-intrinsic ABC protein 8 OS=Arabidopsis thaliana GN=ABCB28 PE=4 SV=1	1.578	Up	ABCB28	19.6	59.245	123.66	24	9	9	9	9	6	8	9	7	8	9	7	162990000	257070000	187210000	0.805	1.27	0.925
P56793	50S ribosomal protein L16, chloroplastic OS=Arabidopsis thaliana GN=rpl16 PE=3 SV=1	0.685	Down	rpl16	48.9	15.294	40.943	19	5	5	6	4	9	5	5	5	5	5	5	519540000	356370000	686580000	0.998	0.684	1.318
Q9M2B9	Amine oxidase OS=Arabidopsis thaliana GN=F23N14_50 PE=2 SV=1	0.64	Down	F23N14_50	7	77.532	22.6	6	3	3	3	2	1	3	3	2	3	3	2	39385000	25202000	29098000	1.261	0.807	0.932
P56778	Photosystem II CP43 reaction center protein OS=Arabidopsis thaliana GN=psbC PE=1 SV=3	0.627	Down	psbC	36.4	51.867	323.31	223	17	17	78	60	85	16	15	16	16	15	16	57266000000	35874000000	50405000000	1.197	0.75	1.053
F4IEK8	PII, uridylyltransferase (DUF2921) OS=Arabidopsis thaliana GN=At1g52780 PE=1 SV=1	1.205	Up	At1g52780	5.4	119.96	25.077	5	4	4	1	3	1	3	4	3	3	4	3	30587000	36824000	25992000	0.982	1.183	0.835
Q9SF45	FAD/NAD(P)-binding oxidoreductase family protein OS=Arabidopsis thaliana GN=F11F8_15 PE=2 SV=1	0.786	Down	F11F8_15	22.9	52.258	137.43	29	10	10	10	10	9	10	10	10	10	10	10	221050000	173700000	233960000	1.055	0.829	1.116
F4JVN6	Tripeptidyl-peptidase 2 OS=Arabidopsis thaliana GN=TPP2 PE=1 SV=1	1.257	Up	TPP2	34.3	152.37	323.31	105	38	38	32	37	36	34	34	34	34	34	34	714410000	898370000	1013600000	0.816	1.026	1.158
Q8L948	Putative uncharacterized protein OS=Arabidopsis thaliana GN=At4g32930 PE=2 SV=1	2.041	Up	At4g32930	26.9	18.466	23.731	5	3	3	0	5	0	2	3	2	2	3	2	24386000	49736000	18461000	0.79	1.612	0.598
F4IG09	Subtilisin-like protease SBT4.1 OS=Arabidopsis thaliana GN=SBT4.1 PE=3 SV=1	0.507	Down	SBT4.1	26.5	87.919	148.15	28	14	14	10	5	13	14	10	13	14	10	13	413900000	209930000	432340000	1.176	0.596	1.228
Q9LS97	AT3G18790 protein OS=Arabidopsis thaliana GN=At3g18790 PE=2 SV=1	1.26	Up	At3g18790	12	35.377	30.633	6	3	3	1	3	2	2	3	3	2	3	3	10711000	13491000	8815000	0.973	1.226	0.801
Q9LUB2	AT5g48220/MIF21_11 OS=Arabidopsis thaliana GN=MIF21.11 PE=2 SV=1	0.789	Down	MIF21.11	49.3	41.968	105.48	32	15	15	10	12	10	13	13	13	13	13	13	460610000	363420000	374190000	1.153	0.91	0.937
Q9SYT0	Annexin D1 OS=Arabidopsis thaliana GN=ANN1 PE=1 SV=1	0.435	Down	ANN1	75.1	36.203	323.31	129	30	30	46	36	47	27	27	30	27	27	30	9567700000	4163100000	8889200000	1.269	0.552	1.179
Q39249	Violaxanthin de-epoxidase, chloroplastic OS=Arabidopsis thaliana GN=VDE1 PE=1 SV=1	0.677	Down	VDE1	29.4	52.017	92.931	19	9	9	6	7	6	8	8	9	8	8	9	502550000	340000000	503520000	1.12	0.758	1.122
Q8VY57	ADP-ribosylation factor-like protein 8a OS=Arabidopsis thaliana GN=ARL8A PE=2 SV=1	2.585	Up	ARL8A	32.6	20.403	50.342	6	4	2	1	2	3	4	3	4	2	1	2	34240000	88531000	69904000	0.533	1.378	1.088
Q8L9P8	Protein RALF-like 33 OS=Arabidopsis thaliana GN=RALFL33 PE=2 SV=1	0.6	Down	RALFL33	23.3	12.806	30.694	13	5	5	4	3	6	5	5	5	5	5	5	180100000	108150000	118680000	1.328	0.797	0.875
O49377	Vesicle-associated membrane protein 711 OS=Arabidopsis thaliana GN=VAMP711 PE=1 SV=2	0.825	Down	VAMP711	53.4	25.039	83.971	19	9	8	7	5	7	7	8	9	6	7	8	66733000	55051000	83266000	0.976	0.805	1.218
Q8W4H8	Inactive GDSL esterase/lipase-like protein 23 OS=Arabidopsis thaliana GN=GLL23 PE=1 SV=1	0.708	Down	GLL23	16.8	43.143	82.04	6	5	5	1	1	4	4	3	5	4	3	5	33146000	23460000	131630000	0.528	0.374	2.098
Q9S7M0	Chlorophyll a-b binding protein 3, chloroplastic OS=Arabidopsis thaliana GN=LHCB3 PE=1 SV=1	0.629	Down	LHCB3	56.6	28.706	253.26	67	7	6	21	23	23	7	7	7	6	6	6	10598000000	6662800000	6622600000	1.331	0.837	0.832
Q67YE7	Protein-tyrosine phosphatase OS=Arabidopsis thaliana GN=At3g44620 PE=2 SV=1	1.241	Up	At3g44620	17.2	26.95	49.83	15	6	6	4	7	4	5	6	5	5	6	5	99608000	123660000	92616000	0.946	1.174	0.88
Q9XH48	Mitochondrial import inner membrane translocase subunit TIM13 OS=Arabidopsis thaliana GN=TIM13 PE=1 SV=2	1.349	Up	TIM13	29.9	9.4116	77.875	7	2	2	3	2	2	2	2	2	2	2	2	74686000	100790000	63647000	0.937	1.264	0.799
Q9SRG3	Protein disulfide isomerase-like 1-2 OS=Arabidopsis thaliana GN=PDIL1-2 PE=2 SV=1	1.766	Up	PDIL1-2	60.8	56.364	309.94	67	29	23	20	25	22	27	28	28	21	22	22	1406400000	2483600000	1114700000	0.843	1.489	0.668
Q9FVQ1	Nucleolin 1 OS=Arabidopsis thaliana GN=NUCL1 PE=1 SV=1	1.266	Up	NUCL1	10.2	58.773	42.902	9	6	6	3	3	3	5	6	4	5	6	4	116150000	147070000	62794000	1.069	1.353	0.578
O22265	Signal recognition particle 43 kDa protein, chloroplastic OS=Arabidopsis thaliana GN=CAO PE=1 SV=2	1.846	Up	CAO	24.7	41.279	80.643	15	7	7	1	7	7	5	7	6	5	7	6	540630000	998070000	770890000	0.702	1.296	1.001
P83291	NADH-cytochrome b5 reductase-like protein OS=Arabidopsis thaliana GN=CBR2 PE=1 SV=2	0.812	Down	CBR2	40.5	35.987	121.87	37	12	12	14	9	14	11	9	12	11	9	12	994390000	806850000	895360000	1.106	0.898	0.996
F4I9A9	OxaA/YidC-like membrane insertion protein OS=Arabidopsis thaliana GN=ALB4 PE=3 SV=1	0.798	Down	ALB4	10	51.172	26.056	5	4	4	1	2	2	4	4	4	4	4	4	64767000	51684000	43811000	1.212	0.967	0.82
Q8L762	Beta-amylase 6 OS=Arabidopsis thaliana GN=BAM6 PE=2 SV=1	0.683	Down	BAM6	5.7	66.567	19.292	5	3	3	2	1	2	3	3	2	3	3	2	24345000	16632000	27501000	1.067	0.729	1.205
Q8LF99	Probable xyloglucan endotransglucosylase/hydrolase protein 6 OS=Arabidopsis thaliana GN=XTH6 PE=2 SV=2	0.388	Down	XTH6	29.1	33.692	69.274	34	8	6	13	7	14	8	8	8	6	6	6	416950000	161740000	492480000	1.168	0.453	1.379
Q9SAD7	Eukaryotic translation initiation factor 4B2 OS=Arabidopsis thaliana GN=EIF4B2 PE=1 SV=1	1.208	Up	EIF4B2	46.8	59.324	202.89	69	24	20	25	21	23	23	23	23	19	19	19	908730000	1097500000	903260000	0.937	1.132	0.931
Q9FZ43	7-dehydrocholesterol reductase-like protein OS=Arabidopsis thaliana GN=F6I1.17 PE=1 SV=1	1.742	Up	F6I1.17	31.9	16.382	25.856	9	3	3	3	3	3	3	3	3	3	3	3	52463000	91351000	42388000	0.845	1.472	0.683
Q9LJL3	Presequence protease 1, chloroplastic/mitochondrial OS=Arabidopsis thaliana GN=PREP1 PE=1 SV=2	1.203	Up	PREP1	48.1	121.01	323.31	116	46	46	36	40	40	43	43	43	43	43	43	1889000000	2273200000	2031300000	0.915	1.101	0.984
O23193	CBS domain-containing protein CBSX1, chloroplastic OS=Arabidopsis thaliana GN=CBSX1 PE=1 SV=2	0.623	Down	CBSX1	24.2	25.768	29.15	5	4	4	3	1	1	4	3	3	4	3	3	82164000	51172000	44736000	1.384	0.862	0.754
P36212	50S ribosomal protein L12-3, chloroplastic OS=Arabidopsis thaliana GN=RPL12C PE=2 SV=2	1.213	Up	RPL12C	57.2	19.682	128.92	40	9	9	10	18	12	8	9	8	8	9	8	6363200000	7714700000	5592000000	0.97	1.177	0.853
Q682I1	Protein BOLA1, chloroplastic OS=Arabidopsis thaliana GN=BOLA1 PE=1 SV=1	1.415	Up	BOLA1	21.2	17.672	50.347	4	2	2	1	3	0	2	2	1	2	2	1	19748000	27948000	0	0.828	1.172
A8MR97	Eukaryotic translation initiation factor 4G OS=Arabidopsis thaliana GN=EIF4G PE=1 SV=1	1.516	Up	EIF4G	17.1	187.55	192.76	36	22	22	12	17	7	21	21	19	21	21	19	156280000	237160000	155870000	0.854	1.295	0.851
Q94A09	AT1G36310 protein OS=Arabidopsis thaliana GN=At1g36310 PE=1 SV=1	1.211	Up	At1g36310	16.1	44.959	47.915	9	5	5	3	3	3	5	5	5	5	5	5	36811000	44609000	29256000	0.998	1.209	0.793
Q9STF2	Protein plastid transcriptionally active 16, chloroplastic OS=Arabidopsis thaliana GN=PTAC16 PE=1 SV=1	0.66	Down	PTAC16	61.2	54.358	323.31	142	30	30	53	44	45	30	29	30	30	29	30	9483100000	6260000000	8823300000	1.158	0.764	1.077
Q9LU01	Ycf3-interacting protein 1, chloroplastic OS=Arabidopsis thaliana GN=Y3IP1 PE=1 SV=1	2.203	Up	Y3IP1	22.5	31.816	38.691	10	5	5	1	6	3	5	5	5	5	5	5	35062000	77238000	51798000	0.641	1.412	0.947
O04350	Tubulin-folding cofactor A OS=Arabidopsis thaliana GN=TFCA PE=1 SV=2	1.437	Up	TFCA	52.2	12.824	70.698	6	5	5	1	4	1	3	5	5	3	5	5	39225000	56372000	47199000	0.824	1.184	0.992
Q9SAK4	Succinate-semialdehyde dehydrogenase, mitochondrial OS=Arabidopsis thaliana GN=ALDH5F1 PE=1 SV=2	0.744	Down	ALDH5F1	49.8	56.558	323.31	75	24	24	27	24	24	22	21	22	22	21	22	1124400000	835720000	979890000	1.147	0.853	1
Q42347	60S ribosomal protein L24-1 OS=Arabidopsis thaliana GN=RPL24A PE=1 SV=2	0.623	Down	RPL24A	24.4	18.85	32.345	10	4	4	3	3	4	3	3	4	3	3	4	272480000	169640000	206010000	1.261	0.785	0.954
Q9LPZ1	Multiple organellar RNA editing factor 9, chloroplastic OS=Arabidopsis thaliana GN=MORF9 PE=1 SV=1	0.664	Down	MORF9	32.8	26.2	92.888	14	5	5	5	4	5	5	5	5	5	5	5	307690000	204500000	229230000	1.245	0.827	0.928
Q9FPJ8	Polyadenylate-binding protein RBP45A OS=Arabidopsis thaliana GN=RBP45A PE=2 SV=1	1.328	Up	RBP45A	14	42.323	36.55	11	4	4	2	5	4	4	4	4	4	4	4	79354000	105390000	91413000	0.862	1.145	0.993
Q9SX53	At1g50380/F14I3_27 OS=Arabidopsis thaliana GN=At1g50380 PE=2 SV=1	0.661	Down	At1g50380	23.8	80.938	117.17	23	12	12	10	5	8	11	10	12	11	10	12	280840000	185680000	235150000	1.201	0.794	1.005
Q42529	Tryptophan synthase alpha chain, chloroplastic OS=Arabidopsis thaliana GN=TSA1 PE=1 SV=1	1.429	Up	TSA1	58	33.199	185.31	41	11	11	8	20	13	11	11	10	11	11	10	488480000	698160000	450850000	0.895	1.279	0.826
Q93ZG7	DEAD-box ATP-dependent RNA helicase 38 OS=Arabidopsis thaliana GN=RH38 PE=1 SV=2	1.415	Up	RH38	24.8	55.383	83.206	19	9	9	6	8	5	8	8	7	8	8	7	105130000	148750000	120330000	0.843	1.193	0.965
O04314	PYK10-binding protein 1 OS=Arabidopsis thaliana GN=PBP1 PE=1 SV=1	0.215	Down	PBP1	67.8	32.158	164.07	28	13	13	14	2	12	13	10	12	13	10	12	701290000	150940000	618290000	1.431	0.308	1.261
Q9FUS6	Glutathione S-transferase U13 OS=Arabidopsis thaliana GN=GSTU13 PE=2 SV=1	0.645	Down	GSTU13	26	25.131	52.35	22	6	6	9	5	8	6	6	6	6	6	6	469160000	302600000	438410000	1.163	0.75	1.087
F4KFV6	Trypsin family protein with PDZ domain-containing protein OS=Arabidopsis thaliana GN=DEG8 PE=4 SV=1	0.826	Down	DEG8	24.2	46.259	75.779	20	8	8	8	6	6	8	8	8	8	8	8	302440000	249790000	286240000	1.082	0.894	1.024
Q9FJZ7	AT5G66420 protein OS=Arabidopsis thaliana GN=At5g66420 PE=2 SV=1	0.775	Down	At5g66420	6.2	80.718	35.531	10	5	5	4	3	3	5	5	5	5	5	5	23537000	18232000	26235000	1.038	0.804	1.157
Q9LHB9	Peroxidase 32 OS=Arabidopsis thaliana GN=PER32 PE=1 SV=3	0.703	Down	PER32	17.9	38.847	18.228	5	6	2	0	2	3	5	5	6	1	1	2	36529000	25691000	47559000	0.998	0.702	1.3
F4KCL2	CD2-binding protein-like protein OS=Arabidopsis thaliana GN=At5g09390 PE=1 SV=1	1.699	Up	At5g09390	8.6	39.98	15.213	4	2	2	1	2	1	2	2	1	2	2	1	7859500	13355000	0	0.741	1.259
O81299	AT4g02340 protein OS=Arabidopsis thaliana GN=At4g02340 PE=2 SV=1	0.744	Down	At4g02340	14.2	36.656	26.4	9	4	4	3	3	3	3	4	4	3	4	4	36448000	27123000	43940000	1.017	0.757	1.226
A8MRW6	Calcium-dependent lipid-binding (CaLB domain) family protein OS=Arabidopsis thaliana GN=At3g55470 PE=4 SV=1	2.15	Up	At3g55470	19.4	17.187	13.136	3	2	2	1	2	0	2	2	1	2	2	1	10456000	22483000	0	0.635	1.365
F4K410	Putative elongation factor TypA-like SVR3, chloroplastic OS=Arabidopsis thaliana GN=SVR3 PE=1 SV=1	1.285	Up	SVR3	19.6	74.314	81.816	21	11	11	6	7	8	11	10	11	11	10	11	120080000	154330000	153060000	0.843	1.083	1.074
Q9LME4	Probable protein phosphatase 2C 9 OS=Arabidopsis thaliana GN=At1g22280 PE=1 SV=1	1.268	Up	At1g22280	40.9	30.721	86.525	23	9	9	6	10	7	7	7	7	7	7	7	255800000	324180000	262350000	0.911	1.155	0.934
Q9M088	Glucan endo-1,3-beta-glucosidase 5 OS=Arabidopsis thaliana GN=At4g31140 PE=1 SV=1	0.687	Down	At4g31140	12	52.715	39.375	8	7	7	2	2	4	6	7	7	6	7	7	116000000	79754000	97444000	1.187	0.816	0.997
Q5M729	Dihydrolipoyllysine-residue acetyltransferase component 3 of pyruvate dehydrogenase complex, mitochondrial OS=Arabidopsis thaliana GN=At1g54220 PE=1 SV=1	0.629	Down	At1g54220	30.6	58.467	70.49	24	12	9	9	8	7	12	12	12	9	9	9	287820000	181020000	235560000	1.226	0.771	1.003
Q9SFB3	Protein TAB2 homolog, chloroplastic OS=Arabidopsis thaliana GN=ATAB2 PE=2 SV=1	1.725	Up	ATAB2	8.6	41.917	20.536	4	2	2	1	2	1	2	2	1	2	2	1	9154500	15774000	0	0.734	1.266
Q9LU85	Probable plastid-lipid-associated protein 4, chloroplastic OS=Arabidopsis thaliana GN=PAP4 PE=2 SV=1	0.831	Down	PAP4	49.6	27.163	132.71	54	12	8	20	16	18	12	12	12	8	8	8	1077800000	895680000	1098500000	1.053	0.875	1.073
Q9ZRA2	Homogentisate 1,2-dioxygenase OS=Arabidopsis thaliana GN=HGO PE=2 SV=2	0.789	Down	HGO	13.9	51.455	31.048	8	4	4	4	1	3	4	3	4	4	3	4	41071000	32384000	31061000	1.179	0.93	0.892
Q8GUN7	Adenylosuccinate lyase OS=Arabidopsis thaliana GN=At1g36280 PE=2 SV=1	0.659	Down	At1g36280	21.6	58.815	18.396	4	11	3	1	1	2	11	9	10	3	2	3	47820000	31496000	39571000	1.207	0.795	0.999
Q9SUR3	Reticulon-like protein B1 OS=Arabidopsis thaliana GN=RTNLB1 PE=1 SV=1	1.797	Up	RTNLB1	13.8	30.528	19.186	3	3	3	0	3	0	2	3	1	2	3	1	16652000	29937000	0	0.715	1.285
Q9ZWC4	At1g04040/F21M11_2 OS=Arabidopsis thaliana GN=At1g04040 PE=2 SV=1	0.638	Down	At1g04040	36.5	31.096	69.938	25	10	8	10	4	11	9	10	9	7	8	7	485220000	309140000	582540000	1.057	0.674	1.269
F4J117	Phosphoglucan phosphatase LSF1, chloroplastic OS=Arabidopsis thaliana GN=LSF1 PE=1 SV=1	0.745	Down	LSF1	9	65.74	24.58	8	3	3	3	3	2	3	3	3	3	3	3	34346000	25570000	31004000	1.133	0.844	1.023
A0A1P8AM79	alpha-1,2-Mannosidase OS=Arabidopsis thaliana GN=MNS3 PE=3 SV=1	1.23	Up	MNS3	6.8	71.07	30.074	9	4	4	2	4	3	4	4	4	4	4	4	22144000	27216000	25409000	0.888	1.092	1.02
Q9S7Z3	Glutathione gamma-glutamylcysteinyltransferase 1 OS=Arabidopsis thaliana GN=PCS1 PE=1 SV=1	1.708	Up	PCS1	25.8	54.474	107.17	21	10	10	5	9	7	9	10	9	9	10	9	141110000	241140000	153240000	0.791	1.351	0.859
Q9FFA5	Putative uncharacterized protein At5g23750 OS=Arabidopsis thaliana GN=MRO11.3 PE=2 SV=1	0.676	Down	MRO11.3	27.2	22.452	41.405	8	5	5	3	1	4	5	3	5	5	3	5	45164000	30528000	73984000	0.905	0.612	1.483
Q9LZK5	DnaJ protein ERDJ3B OS=Arabidopsis thaliana GN=ERDJ3B PE=1 SV=1	1.503	Up	ERDJ3B	24.6	39.199	65.546	15	9	9	3	6	6	7	9	8	7	9	8	163520000	245790000	147530000	0.881	1.324	0.795
Q8VZC3	Delta-1-pyrroline-5-carboxylate dehydrogenase 12A1, mitochondrial OS=Arabidopsis thaliana GN=ALDH12A1 PE=2 SV=1	0.812	Down	ALDH12A1	41.9	61.772	256.13	66	22	22	25	18	23	20	21	22	20	21	22	1041000000	845240000	1062200000	1.059	0.86	1.081
Q96266	Glutathione S-transferase F8, chloroplastic OS=Arabidopsis thaliana GN=GSTF8 PE=1 SV=3	1.526	Up	GSTF8	58.6	29.231	323.31	90	11	11	31	31	28	11	11	10	11	11	10	3424800000	5224600000	3142100000	0.871	1.329	0.799
Q8LAN3	Probable prolyl 4-hydroxylase 4 OS=Arabidopsis thaliana GN=P4H4 PE=2 SV=1	1.223	Up	P4H4	35.6	33.06	75.317	16	8	5	6	7	3	8	8	7	5	5	5	112070000	137180000	90809000	0.989	1.21	0.801
Q9FFT4	Pyruvate decarboxylase 2 OS=Arabidopsis thaliana GN=PDC2 PE=2 SV=1	0.525	Down	PDC2	20.6	65.817	128.62	27	11	11	10	6	11	10	11	10	10	11	10	389810000	204690000	260030000	1.369	0.719	0.913
Q9ZSY2	Chaperone protein dnaJ 15 OS=Arabidopsis thaliana GN=ATJ15 PE=1 SV=1	1.442	Up	ATJ15	5.1	45.483	12.401	2	2	2	0	2	0	2	2	1	2	2	1	5698300	8209300	0	0.819	1.181
F4JVC5	Phenylalanyl-tRNA synthetase, putative / phenylalanine-tRNA ligase OS=Arabidopsis thaliana GN=At4g39280 PE=4 SV=1	1.21	Up	At4g39280	17.3	55.777	42.893	8	7	7	1	3	4	6	5	6	6	5	6	53330000	64552000	44756000	0.984	1.191	0.826
Q9LHD9	UPF0496 protein At3g28270 OS=Arabidopsis thaliana GN=At3g28270 PE=2 SV=1	0.444	Down	At3g28270	33.7	41.612	103.02	24	12	12	11	2	11	11	7	10	11	7	10	246740000	109690000	346810000	1.053	0.468	1.479
Q9LMB2	T29M8.1 protein OS=Arabidopsis thaliana GN=T29M8.1 PE=4 SV=1	0.672	Down	T29M8.1	16.1	34.341	29.466	8	4	4	4	3	1	4	4	3	4	4	3	85579000	57492000	88825000	1.107	0.744	1.149
Q8L606	Putative uncharacterized protein At3g53560 OS=Arabidopsis thaliana GN=At3g53560 PE=2 SV=1	0.823	Down	At3g53560	25.6	38.664	58.52	17	8	7	6	4	7	8	7	6	7	6	5	117000000	96285000	109400000	1.088	0.895	1.017
Q9LVM1	ABC transporter B family member 25, mitochondrial OS=Arabidopsis thaliana GN=ABCB25 PE=1 SV=1	1.531	Up	ABCB25	10.3	80.419	34.079	8	5	5	4	2	2	5	2	3	5	2	3	19108000	29246000	24601000	0.786	1.203	1.012
Q9SJA7	Probable sarcosine oxidase OS=Arabidopsis thaliana GN=At2g24580 PE=2 SV=1	1.303	Up	At2g24580	11.5	45.701	29.55	8	4	4	4	3	1	4	4	3	4	4	3	30864000	40220000	30332000	0.913	1.19	0.897
A0A1I9LM90	RNA-binding KH domain-containing protein OS=Arabidopsis thaliana GN=FLK PE=4 SV=1	1.562	Up	FLK	9.2	60.577	29.311	7	4	4	1	4	2	3	3	3	3	3	3	28196000	44016000	27847000	0.845	1.32	0.835
Q9FX83	NADH dehydrogenase [ubiquinone] iron-sulfur protein 8-B, mitochondrial OS=Arabidopsis thaliana GN=At1g16700 PE=1 SV=1	1.404	Up	At1g16700	23	25.377	11.727	5	6	2	1	2	2	4	5	5	2	2	2	19832000	27828000	20231000	0.876	1.23	0.894
O23629	Histone H2B.6 OS=Arabidopsis thaliana GN=H2B PE=1 SV=3	0.601	Down	H2B	42	16.436	67.577	28	7	1	9	9	10	5	6	6	1	1	1	1947600000	1170000000	1892000000	1.166	0.701	1.133
Q9SI37	WRKY transcription factor 1 OS=Arabidopsis thaliana GN=WRKY1 PE=1 SV=1	1.807	Up	WRKY1	18.3	54.01	52.145	8	6	6	3	5	0	5	6	5	5	6	5	50534000	91353000	53963000	0.774	1.399	0.827
O04905	UMP-CMP kinase 3 OS=Arabidopsis thaliana GN=UMK3 PE=1 SV=1	1.565	Up	UMK3	36.1	22.481	71.732	21	9	8	5	8	8	9	9	9	8	8	8	247530000	387520000	334480000	0.766	1.199	1.035
Q8GWQ6	UPF0235 protein At5g63440 OS=Arabidopsis thaliana GN=At5g63440 PE=1 SV=1	2.13	Up	At5g63440	8.2	25.693	11.27	3	2	2	1	2	0	2	2	1	2	2	1	8166400	17381000	0	0.639	1.361
Q9C8D8	Eukaryotic translation initiation factor 3 subunit J OS=Arabidopsis thaliana GN=At1g66070 PE=2 SV=1	1.869	Up	At1g66070	21.2	25.507	26.572	7	4	4	1	3	3	2	3	3	2	3	3	12730000	23798000	26112000	0.61	1.14	1.251
Q8GSJ1	ATP phosphoribosyltransferase 2, chloroplastic OS=Arabidopsis thaliana GN=HISN1B PE=1 SV=1	0.776	Down	HISN1B	29.3	44.756	110.77	18	10	9	6	3	9	9	10	10	8	9	9	336450000	260880000	337130000	1.08	0.838	1.082
P56766	Photosystem I P700 chlorophyll a apoprotein A1 OS=Arabidopsis thaliana GN=psaA PE=2 SV=1	0.788	Down	psaA	23.7	83.23	216.02	129	20	20	41	42	46	19	20	20	19	20	20	32273000000	25445000000	30214000000	1.101	0.868	1.031
P14671	Tryptophan synthase beta chain 1, chloroplastic OS=Arabidopsis thaliana GN=TSB1 PE=2 SV=1	1.643	Up	TSB1	22.1	50.925	133.8	23	8	8	6	10	7	8	8	8	8	8	8	201280000	330960000	223780000	0.799	1.313	0.888
O82762	F17H15.1/F17H15.1 OS=Arabidopsis thaliana GN=At2g25970 PE=1 SV=1	1.291	Up	At2g25970	26.7	64.606	195.26	39	14	13	12	13	14	14	14	13	13	13	13	470850000	607670000	406120000	0.951	1.228	0.821
Q8L745	AT5g42220/K5J14_2 OS=Arabidopsis thaliana GN=At5g42220 PE=2 SV=1	1.254	Up	At5g42220	12.5	92.553	51.748	16	8	8	4	6	6	6	8	6	6	8	6	87715000	109980000	99587000	0.885	1.11	1.005
O64644	Histone deacetylase complex subunit SAP18 OS=Arabidopsis thaliana GN=At2g45640 PE=1 SV=1	1.38	Up	At2g45640	38.8	17.164	38.181	18	5	5	8	5	5	5	5	5	5	5	5	199430000	275360000	175130000	0.921	1.271	0.808
Q9SSL1	Protein C2-DOMAIN ABA-RELATED 7 OS=Arabidopsis thaliana GN=CAR7 PE=1 SV=1	2.495	Up	CAR7	39.4	18.657	66.281	11	5	5	2	6	3	4	5	5	4	5	5	49845000	124470000	60947000	0.636	1.587	0.777
Q93Z08	Glucan endo-1,3-beta-glucosidase 6 OS=Arabidopsis thaliana GN=At5g58090 PE=1 SV=2	0.744	Down	At5g58090	19.7	52.211	46.778	12	7	7	5	5	2	7	6	7	7	6	7	134800000	100240000	108120000	1.178	0.876	0.945
A0A1P8BC80	D-aminoacid aminotransferase-like PLP-dependent enzymes superfamily protein OS=Arabidopsis thaliana GN=ADCL PE=4 SV=1	0.58	Down	ADCL	45.6	32.271	86.042	18	11	11	9	4	5	11	10	11	11	10	11	348300000	201810000	316110000	1.206	0.699	1.095
Q39255	SKP1-like protein 1A OS=Arabidopsis thaliana GN=SKP1A PE=1 SV=1	2.031	Up	SKP1A	43.8	17.857	84.433	20	6	3	7	7	6	6	6	5	3	3	2	248000000	503560000	299160000	0.708	1.438	0.854
Q42029	Oxygen-evolving enhancer protein 2-1, chloroplastic OS=Arabidopsis thaliana GN=PSBP1 PE=1 SV=2	0.77	Down	PSBP1	61.2	28.095	323.31	298	14	14	102	89	107	13	14	14	13	14	14	32422000000	24980000000	29592000000	1.118	0.861	1.02
F4K658	FAD/NAD(P)-binding oxidoreductase family protein OS=Arabidopsis thaliana GN=At5g49555 PE=4 SV=1	1.321	Up	At5g49555	4	60.489	20.253	6	2	2	2	2	2	2	2	2	2	2	2	30043000	39682000	30963000	0.895	1.182	0.923
Q9FJ82	Dihydrodipicolinate reductase-like protein CRR1, chloroplastic OS=Arabidopsis thaliana GN=DAPB3 PE=2 SV=1	0.601	Down	DAPB3	13.4	32.038	22.174	4	4	4	1	2	1	3	2	3	3	2	3	67105000	40372000	64213000	1.173	0.705	1.122
Q9LTX9	Heat shock 70 kDa protein 7, chloroplastic OS=Arabidopsis thaliana GN=HSP70-7 PE=2 SV=1	0.743	Down	HSP70-7	46.4	76.996	140.55	41	33	9	14	14	13	31	32	32	9	9	9	1820700000	1351700000	1640400000	1.135	0.843	1.023
A1L4Y4	At5g61510 OS=Arabidopsis thaliana GN=At5g61510 PE=2 SV=1	1.63	Up	At5g61510	16.3	44.022	46.701	15	7	7	4	6	5	7	6	7	7	6	7	101890000	166120000	118040000	0.792	1.291	0.917
Q9LQF2	Alkaline/neutral invertase CINV1 OS=Arabidopsis thaliana GN=CINV1 PE=1 SV=1	2.316	Up	CINV1	18.7	62.834	76.913	16	10	10	4	10	2	6	10	6	6	10	6	69713000	161450000	62614000	0.712	1.649	0.639
A0A1P8B3B6	Beta-adaptin-like protein OS=Arabidopsis thaliana GN=At4g23460 PE=3 SV=1	1.516	Up	At4g23460	4	88.481	20.865	6	3	2	1	3	2	3	3	3	2	2	2	28678000	43450000	27510000	0.863	1.308	0.828
Q9FXA0	F14J22.5 protein OS=Arabidopsis thaliana GN=At1g49740 PE=2 SV=1	0.765	Down	At1g49740	8.6	39.825	18.464	5	3	3	3	1	1	3	3	3	3	3	3	22882000	17514000	20038000	1.136	0.869	0.995
Q9FNX5	Dynamin-related protein 1E OS=Arabidopsis thaliana GN=DRP1E PE=1 SV=1	1.37	Up	DRP1E	31.7	69.803	142.37	39	17	13	12	16	11	16	16	16	13	12	12	162550000	222630000	147620000	0.915	1.254	0.831
O82399	Malate dehydrogenase 1, peroxisomal OS=Arabidopsis thaliana GN=PMDH1 PE=2 SV=1	0.83	Down	PMDH1	31.6	37.465	94.57	18	9	8	7	6	5	7	9	7	6	8	6	525800000	436470000	350160000	1.202	0.998	0.8
Q9FGT8	Temperature-induced lipocalin-1 OS=Arabidopsis thaliana GN=TIL PE=1 SV=1	0.741	Down	TIL	35.5	21.434	100.24	22	7	7	6	7	9	7	7	7	7	7	7	1338400000	990780000	1374500000	1.084	0.803	1.113
Q9LDY5	Peptidyl-prolyl cis-trans isomerase FKBP17-2, chloroplastic OS=Arabidopsis thaliana GN=FKBP17-2 PE=1 SV=1	0.771	Down	FKBP17-2	24.3	26.529	45.418	14	5	5	6	4	4	5	4	4	5	4	4	259420000	199870000	227690000	1.133	0.873	0.994
Q9SB81	Peroxidase 42 OS=Arabidopsis thaliana GN=PER42 PE=1 SV=2	0.644	Down	PER42	38.2	37.294	61.971	16	8	8	6	3	7	8	6	8	8	6	8	161960000	104220000	213460000	1.013	0.652	1.335
Q94AZ4	Probable calcium-binding protein CML13 OS=Arabidopsis thaliana GN=CML13 PE=2 SV=1	1.507	Up	CML13	85.8	16.517	184.77	51	15	6	17	18	16	15	15	15	6	6	6	751820000	1133600000	960410000	0.793	1.195	1.012
Q9SHG8	At1g17100 OS=Arabidopsis thaliana GN=AtHBP1 PE=2 SV=1	0.688	Down	AtHBP1	51.3	25.388	274.47	37	8	8	12	12	13	8	8	8	8	8	8	1269800000	874320000	1089600000	1.178	0.811	1.011
Q8RW90	At1g12050/F12F1_8 OS=Arabidopsis thaliana GN=AtFAH PE=2 SV=1	0.776	Down	AtFAH	20.7	46.095	73.188	18	7	7	7	6	5	7	7	7	7	7	7	233460000	181160000	245680000	1.061	0.823	1.116
A0A1P8BEG1	Insulinase (Peptidase family M16) family protein OS=Arabidopsis thaliana GN=SPP PE=4 SV=1	1.774	Up	SPP	4.3	120.72	25.747	7	4	4	0	3	4	4	4	4	4	4	4	19616000	34782000	27322000	0.72	1.277	1.003
Q9FFE0	Putative 4-hydroxy-4-methyl-2-oxoglutarate aldolase 2 OS=Arabidopsis thaliana GN=At5g16450 PE=1 SV=1	1.276	Up	At5g16450	48.8	17.82	89.838	17	7	4	7	6	4	7	7	5	4	4	4	194000000	247490000	219670000	0.88	1.123	0.997
A0A1P8AX49	Cytochrome B5 isoform B OS=Arabidopsis thaliana GN=CB5-B PE=3 SV=1	1.207	Up	CB5-B	11.9	15.065	9.5927	9	1	1	2	3	4	1	1	1	1	1	1	22352000	26974000	25820000	0.892	1.077	1.031
Q9LVI8	Glutamine synthetase cytosolic isozyme 1-3 OS=Arabidopsis thaliana GN=GLN1-3 PE=1 SV=1	11.838	Up	GLN1-3	15.3	38.594	63.977	7	7	3	0	3	4	7	7	7	3	3	3	337210000	3985800000	3444300000	0.13	1.539	1.33
P22954	Probable mediator of RNA polymerase II transcription subunit 37c OS=Arabidopsis thaliana GN=MED37D PE=1 SV=2	5.887	Up	MED37D	50.5	71.386	78.342	15	33	9	4	10	1	29	31	23	8	9	5	77892000	458710000	64212000	0.389	2.29	0.321
P93285	Cytochrome c oxidase subunit 2 OS=Arabidopsis thaliana GN=COX2 PE=1 SV=2	0.716	Down	COX2	21.2	29.674	48.323	10	4	4	3	3	4	4	4	4	4	4	4	304210000	217810000	284970000	1.131	0.81	1.059
Q9M356	Eukaryotic aspartyl protease family protein OS=Arabidopsis thaliana GN=F15G16.210 PE=3 SV=1	0.689	Down	F15G16.210	22.8	51.461	70.484	22	9	8	6	6	10	9	8	9	8	7	8	332860000	229090000	396920000	1.041	0.717	1.242
Q9FXI5	Protein IQ-DOMAIN 32 OS=Arabidopsis thaliana GN=IQD32 PE=1 SV=3	1.921	Up	IQD32	10.3	86.881	148.73	10	6	6	2	5	3	5	5	5	5	5	5	37160000	71375000	45369000	0.724	1.391	0.884
Q9SKX4	50S ribosomal protein L3-1, chloroplastic OS=Arabidopsis thaliana GN=RPL3A PE=2 SV=1	0.736	Down	RPL3A	36.2	29.363	127.26	28	11	11	9	8	11	11	10	11	11	10	11	804300000	591350000	888970000	1.056	0.777	1.167
Q9SAU2	D-ribulose-5-phosphate-3-epimerase OS=Arabidopsis thaliana GN=RPE PE=2 SV=1	0.808	Down	RPE	35.2	30.008	140.35	53	6	6	17	18	18	6	6	6	6	6	6	2844200000	2298800000	1913600000	1.209	0.977	0.814
Q9ASS6	Photosynthetic NDH subunit of lumenal location 5, chloroplastic OS=Arabidopsis thaliana GN=PNSL5 PE=1 SV=1	0.813	Down	PNSL5	41.3	28.306	101.52	51	10	9	16	17	18	10	10	9	9	9	8	3485600000	2832400000	2999700000	1.122	0.912	0.966
Q8GYF7	Nuclear pore complex protein NUP54 OS=Arabidopsis thaliana GN=NUP54 PE=1 SV=1	1.326	Up	NUP54	5.3	41.817	12.238	3	2	2	1	1	1	2	2	2	2	2	2	18619000	24692000	15983000	0.942	1.249	0.809
Q9LNC6	TOM1-like protein 2 OS=Arabidopsis thaliana GN=TOL2 PE=1 SV=1	1.245	Up	TOL2	7	42.797	13.036	3	2	2	2	0	1	2	2	1	2	2	1	11662000	14505000	0	0.891	1.109
Q93Z72	AT5g16970/F2K13_120 OS=Arabidopsis thaliana GN=At5g17000 PE=2 SV=1	0.558	Down	At5g17000	30.7	38.115	38.649	16	10	5	6	5	5	10	9	10	5	5	5	114690000	64049000	114090000	1.175	0.656	1.169
A0A1P8B3K8	Protein phosphatase 2C family protein OS=Arabidopsis thaliana GN=At4g28400 PE=4 SV=1	1.653	Up	At4g28400	34.1	28.777	34.817	7	8	5	3	3	1	7	8	7	4	5	4	75258000	124470000	50141000	0.904	1.494	0.602
O23342	Preprotein translocase subunit SECE1 OS=Arabidopsis thaliana GN=SECE1 PE=1 SV=1	0.663	Down	SECE1	34.5	19.12	62.825	5	3	3	2	1	2	3	2	3	3	2	3	108430000	71819000	72721000	1.286	0.852	0.862
Q9FMC7	Nuclear transport factor 2 (NTF2) family protein OS=Arabidopsis thaliana GN=MUK11.15 PE=2 SV=1	1.206	Up	MUK11.15	32	20.294	29.296	5	4	4	0	3	2	2	4	2	2	4	2	27950000	33700000	22550000	0.996	1.201	0.803
P51407	60S acidic ribosomal protein P2-1 OS=Arabidopsis thaliana GN=RPP2A PE=3 SV=2	1.363	Up	RPP2A	66.1	11.452	37.113	5	5	3	2	2	1	4	5	5	2	3	3	54695000	74556000	74168000	0.807	1.1	1.094
Q9SUI5	Photosystem I reaction center subunit psaK, chloroplastic OS=Arabidopsis thaliana GN=PSAK PE=2 SV=2	0.578	Down	PSAK	40	13.206	101.55	12	3	3	3	5	4	2	2	3	2	2	3	1838000000	1063100000	1101300000	1.378	0.797	0.825
Q38884	Eukaryotic translation initiation factor 3 subunit I OS=Arabidopsis thaliana GN=TIF3I1 PE=2 SV=2	1.34	Up	TIF3I1	47	36.388	116.3	17	12	12	2	6	9	9	8	12	9	8	12	144250000	193120000	180090000	0.836	1.12	1.044
Q9FUP0	12-oxophytodienoate reductase 3 OS=Arabidopsis thaliana GN=OPR3 PE=1 SV=2	0.719	Down	OPR3	43	42.691	143.26	38	13	13	11	14	13	12	12	12	12	12	12	594660000	427630000	527020000	1.151	0.828	1.02
Q9LR75	Coproporphyrinogen-III oxidase 1, chloroplastic OS=Arabidopsis thaliana GN=CPX1 PE=2 SV=1	1.867	Up	CPX1	51.3	43.796	184.67	55	17	17	18	18	19	17	16	16	17	16	16	1203600000	2247300000	1829500000	0.684	1.277	1.039
Q9LIL4	Transmembrane emp24 domain-containing protein p24beta3 OS=Arabidopsis thaliana GN=At3g22845 PE=2 SV=1	1.317	Up	At3g22845	9.8	24.281	14.643	6	2	2	2	3	1	2	2	2	2	2	2	65677000	86444000	69983000	0.887	1.168	0.945
A0A1P8BGN7	E1 C-terminal related 1 OS=Arabidopsis thaliana GN=ECR1 PE=1 SV=1	1.614	Up	ECR1	8.9	44.987	18.619	4	3	3	1	3	0	3	3	3	3	3	3	24852000	40130000	22758000	0.85	1.372	0.778
Q9LTR8	At5g57040 OS=Arabidopsis thaliana GN=MHM17.18 PE=2 SV=1	1.204	Up	MHM17.18	44.7	22.247	58.676	20	6	6	7	7	6	6	6	6	6	6	6	381210000	458920000	388560000	0.931	1.121	0.949
O80575	6,7-dimethyl-8-ribityllumazine synthase, chloroplastic OS=Arabidopsis thaliana GN=At2g44050 PE=2 SV=1	0.813	Down	At2g44050	20.3	24.024	38.217	11	4	4	5	3	3	4	4	4	4	4	4	266210000	216280000	245230000	1.097	0.892	1.011
P93834	Hexokinase-2 OS=Arabidopsis thaliana GN=HXK2 PE=1 SV=1	0.789	Down	HXK2	17.3	54.489	59.106	8	6	3	4	1	3	6	6	6	3	3	3	89719000	70743000	82578000	1.107	0.873	1.019
Q9FNB0	Magnesium-chelatase subunit ChlH, chloroplastic OS=Arabidopsis thaliana GN=CHLH PE=1 SV=1	1.204	Up	CHLH	13.3	153.57	141.15	30	16	16	5	15	10	12	15	13	12	15	13	157120000	189110000	202260000	0.859	1.034	1.106
F4J563	Putative plant snare 13 OS=Arabidopsis thaliana GN=NPSN13 PE=1 SV=1	0.674	Down	NPSN13	18.5	24.537	31.52	7	3	2	3	2	2	2	3	3	1	2	2	43597000	29354000	40576000	1.152	0.776	1.072
Q9SIH1	Peptidyl-prolyl cis-trans isomerase CYP18-2 OS=Arabidopsis thaliana GN=CYP18-2 PE=2 SV=1	1.354	Up	CYP18-2	17.1	18.232	27.031	7	4	4	2	3	2	4	4	4	4	4	4	32511000	44039000	42587000	0.819	1.109	1.072
O64650	40S ribosomal protein S27-1 OS=Arabidopsis thaliana GN=RPS27A PE=3 SV=1	0.66	Down	RPS27A	46.4	9.405	37.471	10	4	3	4	3	3	4	4	4	3	3	3	229170000	151290000	228080000	1.13	0.746	1.124
Q94BY2	At1g65820/F1E22_4 OS=Arabidopsis thaliana GN=At1g65820 PE=2 SV=1	1.346	Up	At1g65820	17.8	16.586	26.118	8	3	3	3	3	2	3	3	2	3	3	2	117710000	158410000	100650000	0.937	1.261	0.801
Q8RWU7	Plant UBX domain-containing protein 4 OS=Arabidopsis thaliana GN=PUX4 PE=1 SV=1	1.737	Up	PUX4	18.5	32.896	47.545	15	6	4	4	7	4	5	6	5	3	4	3	63856000	111000000	63845000	0.803	1.395	0.802
Q9FN21	FAD-dependent oxidoreductase family protein OS=Arabidopsis thaliana GN=At5g67290 PE=2 SV=1	0.694	Down	At5g67290	8.6	43.111	18.141	5	2	2	3	1	1	2	2	2	2	2	2	21478000	14902000	21015000	1.123	0.779	1.098
Q94BV4	DEAD-box ATP-dependent RNA helicase 6 OS=Arabidopsis thaliana GN=RH6 PE=2 SV=2	1.5	Up	RH6	25.4	60.42	78.433	21	11	3	5	9	7	9	10	9	2	3	2	159520000	239470000	163000000	0.852	1.278	0.87
Q93VP9	Putative uncharacterized protein At4g27585 OS=Arabidopsis thaliana GN=AtSLP1 PE=1 SV=1	1.251	Up	AtSLP1	34.5	45.02	77.555	24	12	12	7	10	7	11	12	12	11	12	12	238950000	298760000	254000000	0.905	1.132	0.962
O82263	At2g47960/T9J23.10 OS=Arabidopsis thaliana GN=At2g47960 PE=2 SV=2	0.677	Down	At2g47960	5.9	49.289	18.418	4	2	2	2	0	2	2	2	2	2	2	2	16143000	10924000	19552000	1.039	0.703	1.258
A0A1P8B4B4	Pectinesterase OS=Arabidopsis thaliana GN=PME44 PE=4 SV=1	1.254	Up	PME44	20.8	45.342	62.02	14	8	5	5	4	5	6	8	8	3	5	5	155490000	195050000	185110000	0.871	1.092	1.037
A0A1P8AS42	Glyoxylate reductase 2 OS=Arabidopsis thaliana GN=GLYR2 PE=4 SV=1	0.825	Down	GLYR2	29.1	31.282	49.809	14	5	5	6	4	4	5	5	5	5	5	5	404430000	333580000	397530000	1.068	0.881	1.05
Q9LXZ7	At3g56430 OS=Arabidopsis thaliana GN=T5P19_80 PE=2 SV=1	0.63	Down	T5P19_80	14.3	48.534	29.456	5	4	4	1	2	2	4	4	4	4	4	4	37775000	23780000	65648000	0.891	0.561	1.548
O80763	Probable nucleoredoxin 1 OS=Arabidopsis thaliana GN=At1g60420 PE=1 SV=1	1.66	Up	At1g60420	15.2	65.169	68.531	10	6	6	1	6	3	4	6	3	4	6	3	51914000	86185000	70103000	0.748	1.242	1.01
Q9SSE7	Arogenate dehydratase/prephenate dehydratase 2, chloroplastic OS=Arabidopsis thaliana GN=ADT2 PE=1 SV=1	1.507	Up	ADT2	10.8	42.115	22.61	4	3	3	1	2	1	3	3	3	3	3	3	15681000	23612000	16760000	0.839	1.264	0.897
F4J110	Transducin family protein / WD-40 repeat family protein OS=Arabidopsis thaliana GN=SEC31B PE=1 SV=1	2.085	Up	SEC31B	9.2	118.72	81.475	17	8	8	5	8	4	6	7	6	6	7	6	73822000	153970000	95241000	0.686	1.43	0.885
Q39089	Protein PALE CRESS, chloroplastic OS=Arabidopsis thaliana GN=PAC PE=2 SV=1	1.584	Up	PAC	9.3	36.611	18.678	5	3	3	1	3	1	2	3	2	2	3	2	12433000	19683000	12156000	0.842	1.334	0.824
F4K5B9	Eukaryotic aspartyl protease family protein OS=Arabidopsis thaliana GN=MOJ9.20 PE=3 SV=1	0.66	Down	MOJ9.20	28.4	48.694	83.37	20	11	11	5	7	8	11	11	11	11	11	11	421210000	278090000	574890000	0.992	0.655	1.354
A0A1P8APR2	Plastocyanin OS=Arabidopsis thaliana GN=PETE1 PE=3 SV=1	0.561	Down	PETE1	11.6	21.872	98.608	11	1	1	3	4	4	1	1	1	1	1	1	2175600000	1220700000	956070000	1.5	0.841	0.659
Q9FL37	At5g46230 OS=Arabidopsis thaliana GN=MPL12.1 PE=2 SV=1	2.663	Up	MPL12.1	28.7	16.172	18.083	3	3	3	1	2	0	3	2	2	3	2	2	3134500	8342600	2555700	0.67	1.784	0.546
Q93Y07	Galactolipid galactosyltransferase SFR2, chloroplastic OS=Arabidopsis thaliana GN=SFR2 PE=1 SV=1	0.824	Down	SFR2	23.6	70.778	99.136	31	14	14	9	6	16	13	12	14	13	12	14	296220000	244310000	341120000	1.008	0.831	1.161
O50039	Ornithine carbamoyltransferase, chloroplastic OS=Arabidopsis thaliana GN=OTC PE=1 SV=2	1.218	Up	OTC	23.2	41.002	100.18	23	9	9	8	7	8	8	8	9	8	8	9	400050000	487480000	334900000	0.982	1.196	0.822
A2RVS4	AIG2-like protein C OS=Arabidopsis thaliana GN=AIG2LC PE=1 SV=1	1.513	Up	AIG2LC	39.5	20.122	32.978	9	5	5	2	4	3	4	5	4	4	5	4	82060000	124120000	66396000	0.903	1.366	0.731
Q8VXZ0	Nudix hydrolase 20, chloroplastic OS=Arabidopsis thaliana GN=NUDT20 PE=2 SV=1	0.799	Down	NUDT20	12.8	41.923	32.039	7	4	4	2	1	4	4	4	4	4	4	4	40732000	32561000	43804000	1.044	0.834	1.122
Q9LRJ9	Cysteine-rich repeat secretory protein 38 OS=Arabidopsis thaliana GN=CRRSP38 PE=2 SV=1	1.371	Up	CRRSP38	24.6	27.863	44.676	19	7	7	7	7	5	6	7	6	6	7	6	460820000	631790000	421540000	0.913	1.252	0.835
Q8VYN6	ATP-dependent 6-phosphofructokinase 5, chloroplastic OS=Arabidopsis thaliana GN=PFK5 PE=1 SV=1	1.391	Up	PFK5	22	58.614	128.6	26	8	7	6	10	10	7	8	8	6	7	7	185280000	257960000	166530000	0.912	1.269	0.819
Q9SX22	30S ribosomal protein 3-1, chloroplastic OS=Arabidopsis thaliana GN=At1g68590 PE=2 SV=1	1.446	Up	At1g68590	31.9	18.472	43.412	15	4	4	4	5	6	3	3	4	3	3	4	404830000	585160000	392680000	0.878	1.27	0.852
Q9SD76	Alpha-glucan phosphorylase 2, cytosolic OS=Arabidopsis thaliana GN=PHS2 PE=1 SV=1	0.757	Down	PHS2	39.1	95.158	323.31	73	26	25	23	21	29	23	24	26	22	23	25	1112300000	841500000	1166600000	1.069	0.809	1.122
Q9FUZ2	Peptide deformylase 1B, chloroplastic/mitochondrial OS=Arabidopsis thaliana GN=PDF1B PE=1 SV=2	0.821	Down	PDF1B	32.2	30.61	107.15	27	8	8	8	9	10	7	8	8	7	8	8	360860000	296000000	303500000	1.127	0.925	0.948
F4K0T6	Ethylene-dependent gravitropism-deficient and yellow-green-like 2 OS=Arabidopsis thaliana GN=EGY2 PE=4 SV=1	0.574	Down	EGY2	17.2	56.399	58.372	13	5	5	5	4	4	5	5	5	5	5	5	343690000	197470000	281310000	1.254	0.72	1.026
Q9SFF9	Germin-like protein subfamily 1 member 7 OS=Arabidopsis thaliana GN=At3g05950 PE=2 SV=1	0.575	Down	At3g05950	19.2	24.736	72.849	6	3	3	2	0	4	3	3	3	3	3	3	177440000	102050000	147300000	1.247	0.717	1.035
F4KHG6	Carboxyl-terminal-processing peptidase 1, chloroplastic OS=Arabidopsis thaliana GN=CTPA1 PE=1 SV=1	1.467	Up	CTPA1	12.7	53.033	41.086	13	5	5	6	4	3	5	5	5	5	5	5	58515000	85842000	53152000	0.889	1.304	0.807
Q9FM54	Dihydroneopterin aldolase 2 OS=Arabidopsis thaliana GN=FOLB2 PE=1 SV=1	0.735	Down	FOLB2	11.5	14.685	11.024	4	2	2	1	2	1	2	2	2	2	2	2	44611000	32797000	37658000	1.163	0.855	0.982
A0A1P8AX55	Proteasome endopeptidase complex OS=Arabidopsis thaliana GN=PAG1 PE=1 SV=1	1.525	Up	PAG1	31.3	39.331	71.546	28	10	10	9	12	7	9	10	10	9	10	10	296310000	452090000	378700000	0.789	1.203	1.008
Q9SIZ2	Eukaryotic translation initiation factor 2 subunit alpha homolog OS=Arabidopsis thaliana GN=At2g40290 PE=1 SV=2	1.47	Up	At2g40290	21.2	38.747	50.313	12	6	6	4	5	3	4	6	6	4	6	6	39455000	57973000	56044000	0.771	1.133	1.096
Q3ECU3	AT hook motif-containing protein OS=Arabidopsis thaliana GN=At1g48610 PE=1 SV=1	0.743	Down	At1g48610	36.9	20.208	34.534	9	4	4	3	3	3	4	4	3	4	4	3	106950000	79515000	103350000	1.107	0.823	1.07
F4HTT6	Peptidyl-prolyl cis-trans isomerase CYP26-2, chloroplastic OS=Arabidopsis thaliana GN=CYP26-2 PE=2 SV=1	0.759	Down	CYP26-2	35.3	34.374	125.81	34	11	11	12	11	11	11	11	11	11	11	11	613050000	465710000	506690000	1.16	0.881	0.959
Q9FLW9	Plastidial pyruvate kinase 2 OS=Arabidopsis thaliana GN=PKP2 PE=1 SV=1	0.796	Down	PKP2	25.6	63.521	102.57	21	10	8	7	8	6	9	10	10	7	8	8	242470000	192970000	240440000	1.076	0.857	1.067
A0A1I9LSL6	Pectate lyase OS=Arabidopsis thaliana GN=At3g07010 PE=3 SV=1	0.497	Down	At3g07010	18	42.802	60.2	9	5	5	4	3	2	5	5	5	5	5	5	128870000	64019000	126050000	1.212	0.602	1.186
Q42540	Ubiquitin-conjugating enzyme E2 7 OS=Arabidopsis thaliana GN=UBC7 PE=1 SV=1	2.042	Up	UBC7	28.3	18.722	32.137	5	3	3	2	2	1	3	3	2	3	3	2	34229000	69827000	48655000	0.672	1.372	0.956
Q9LXC9	Soluble inorganic pyrophosphatase 6, chloroplastic OS=Arabidopsis thaliana GN=PPA6 PE=1 SV=1	0.766	Down	PPA6	57.3	33.38	280.15	90	18	18	30	31	29	17	17	17	17	17	17	6596100000	5054700000	5282400000	1.169	0.896	0.936
Q9M1J6	Protein STRICTOSIDINE SYNTHASE-LIKE 9 OS=Arabidopsis thaliana GN=SSL9 PE=2 SV=1	0.495	Down	SSL9	28.6	41.457	76.803	10	8	8	5	0	5	8	5	8	8	5	8	111990000	55521000	148940000	1.062	0.526	1.412
Q9LT69	D-3-phosphoglycerate dehydrogenase 3, chloroplastic OS=Arabidopsis thaliana GN=PGDH3 PE=1 SV=1	0.738	Down	PGDH3	16.7	62.121	79.684	15	9	7	7	3	5	9	8	9	7	6	7	112400000	82956000	116250000	1.082	0.799	1.119
Q9LK73	UDP-glycosyltransferase 88A1 OS=Arabidopsis thaliana GN=UGT88A1 PE=2 SV=1	0.727	Down	UGT88A1	22.7	51.204	148.33	17	8	8	5	6	6	8	8	8	8	8	8	368150000	267570000	374250000	1.094	0.795	1.112
Q9LM02	Cycloartenol-C-24-methyltransferase OS=Arabidopsis thaliana GN=SMT1 PE=1 SV=1	1.659	Up	SMT1	11.9	38.268	18.844	5	3	3	1	2	2	2	2	3	2	2	3	14156000	23505000	21437000	0.719	1.193	1.088
P51818	Heat shock protein 90-3 OS=Arabidopsis thaliana GN=HSP90-3 PE=1 SV=2	2.567	Up	HSP90-3	38.1	80.051	305.46	71	30	2	9	41	21	24	30	28	2	2	2	468340000	1201500000	698340000	0.593	1.522	0.885
Q9LY74	2-methyl-6-phytyl-1,4-hydroquinone methyltransferase, chloroplastic OS=Arabidopsis thaliana GN=VTE3 PE=1 SV=1	0.823	Down	VTE3	28.4	37.926	76.399	22	7	7	8	4	10	7	6	7	7	6	7	302230000	248810000	387740000	0.966	0.795	1.239
Q940G0	Transmembrane 9 superfamily member 1 OS=Arabidopsis thaliana GN=TMN1 PE=1 SV=1	1.353	Up	TMN1	6.1	66.892	22.214	5	3	3	2	2	1	3	2	2	3	2	2	44860000	60672000	63450000	0.796	1.077	1.126
Q501G7	Alpha/beta-Hydrolases superfamily protein OS=Arabidopsis thaliana GN=At4g17470 PE=2 SV=1	2.574	Up	At4g17470	24	34.189	51.213	8	6	6	1	3	4	5	6	5	5	6	5	119620000	308160000	311110000	0.486	1.251	1.263
Q9LMQ2	Chlorophyll a-b binding protein, chloroplastic OS=Arabidopsis thaliana GN=CHLOROPHYLL PROTEIN 24 PE=1 SV=1	1.206	Up	CHLOROPHYLL	48.8	27.522	273.73	92	12	12	33	31	28	12	12	12	12	12	12	11457000000	13811000000	11252000000	0.941	1.135	0.924
P54121	Protein AIG2 A OS=Arabidopsis thaliana GN=AIG2A PE=2 SV=1	1.395	Up	AIG2A	24.7	19.445	40.605	8	6	6	2	5	1	4	6	5	4	6	5	101750000	142010000	92476000	0.908	1.267	0.825
Q0WWW9	D-xylose-proton symporter-like 3, chloroplastic OS=Arabidopsis thaliana GN=At5g59250 PE=1 SV=2	0.798	Down	At5g59250	7.3	59.828	26.245	7	4	4	3	2	2	4	3	4	4	3	4	50020000	39920000	46907000	1.097	0.875	1.028
Q9LE82	RAN GTPase-activating protein 1 OS=Arabidopsis thaliana GN=RANGAP1 PE=1 SV=1	1.215	Up	RANGAP1	12.1	58.826	31.601	10	5	5	2	5	3	4	5	4	4	5	4	115180000	139910000	119920000	0.921	1.119	0.959
P17745	Elongation factor Tu, chloroplastic OS=Arabidopsis thaliana GN=TUFA PE=1 SV=1	0.814	Down	TUFA	64.9	51.63	323.31	201	25	24	72	66	63	25	25	24	24	24	23	17174000000	13983000000	15693000000	1.1	0.895	1.005
O64725	NADH dehydrogenase [ubiquinone] 1 beta subcomplex subunit 3-A OS=Arabidopsis thaliana GN=At2g02510 PE=3 SV=1	0.763	Down	At2g02510	47.2	8.0512	19.341	8	3	3	2	3	3	2	2	3	2	2	3	38935000	29704000	30716000	1.176	0.897	0.927
Q9FMF9	Nuclear protein-like OS=Arabidopsis thaliana GN=MSJ1.11 PE=1 SV=1	1.574	Up	MSJ1.11	4.3	141.45	32.134	4	4	4	1	3	0	2	4	2	2	4	2	21238000	33448000	0	0.777	1.223
Q9XI10	DPP6 N-terminal domain-like protein OS=Arabidopsis thaliana GN=At1g21680 PE=2 SV=1	0.595	Down	At1g21680	35.4	78.441	194.69	55	21	20	19	16	20	21	20	20	20	19	19	782350000	464980000	764090000	1.167	0.694	1.14
F4IFZ9	Delta-1-pyrroline-5-carboxylate synthase OS=Arabidopsis thaliana GN=P5CS1 PE=1 SV=1	0.619	Down	P5CS1	23.1	77.436	115.15	30	16	8	8	8	14	12	13	16	6	6	8	225320000	139270000	308390000	1.004	0.621	1.375
O48917	UDP-sulfoquinovose synthase, chloroplastic OS=Arabidopsis thaliana GN=SQD1 PE=1 SV=1	1.284	Up	SQD1	37.3	53.113	119.72	34	17	17	8	17	9	16	17	17	16	17	17	418830000	537390000	409310000	0.92	1.181	0.899
B3H6I9	Damaged DNA binding protein 1A OS=Arabidopsis thaliana GN=DDB1A PE=4 SV=1	1.278	Up	DDB1A	14.7	118.95	148.26	28	14	6	10	8	10	14	14	13	6	6	5	166330000	212400000	196000000	0.868	1.109	1.023
Q9FUS8	Glutathione S-transferase U17 OS=Arabidopsis thaliana GN=GSTU17 PE=2 SV=1	0.375	Down	GSTU17	23.8	25.307	44.938	9	5	5	4	2	3	4	4	5	4	4	5	90066000	33787000	92791000	1.247	0.468	1.285
Q9LHQ4	AT3g20680/F3H11_7 OS=Arabidopsis thaliana GN=At3g20680 PE=2 SV=1	0.729	Down	At3g20680	10.7	37.436	23.493	8	3	3	3	2	3	3	3	3	3	3	3	39879000	29080000	30839000	1.199	0.874	0.927
A0A1P8ANH8	Protein kinase superfamily protein OS=Arabidopsis thaliana GN=At1g66880 PE=4 SV=1	1.541	Up	At1g66880	9.6	102.11	50.425	12	6	5	4	7	1	3	6	3	2	5	2	33814000	52132000	30677000	0.87	1.341	0.789
Q0WR25	Evolutionarily conserved C-terminal region 5 OS=Arabidopsis thaliana GN=ECT5 PE=1 SV=1	1.77	Up	ECT5	13.7	69.481	53.41	9	5	5	2	5	2	5	5	5	5	5	5	32352000	57317000	28893000	0.819	1.45	0.731
Q9M2Z4	Membrane steroid-binding protein 2 OS=Arabidopsis thaliana GN=MSBP2 PE=1 SV=1	1.308	Up	MSBP2	39.5	25.382	155.87	12	6	5	4	4	4	6	6	6	5	5	5	235420000	307920000	197430000	0.953	1.247	0.8
A0A1P8B4X2	1,2-dihydroxy-3-keto-5-methylthiopentene dioxygenase OS=Arabidopsis thaliana GN=ATARD2 PE=3 SV=1	1.317	Up	ATARD2	47.3	21.365	106.47	22	10	10	7	7	8	9	10	9	9	10	9	317740000	418290000	305510000	0.915	1.205	0.88
A8MR86	Carboxypeptidase OS=Arabidopsis thaliana GN=SCPL51 PE=3 SV=1	1.585	Up	SCPL51	15.2	43.414	60.029	15	6	6	5	6	4	6	6	6	6	6	6	73492000	116560000	77219000	0.825	1.308	0.867
Q94C48	Protein WVD2-like 5 OS=Arabidopsis thaliana GN=WDL5 PE=1 SV=1	1.255	Up	WDL5	9.8	47.542	39.348	7	3	3	2	3	2	3	3	3	3	3	3	25195000	31608000	34383000	0.829	1.04	1.131
Q9LVT8	RGG repeats nuclear RNA binding protein C OS=Arabidopsis thaliana GN=RGGC PE=1 SV=1	0.771	Down	RGGC	33.9	37.999	94.745	40	11	7	14	13	13	11	11	11	7	7	7	1372000000	1058000000	1052900000	1.182	0.911	0.907
Q9LHG9	Nascent polypeptide-associated complex subunit alpha-like protein 1 OS=Arabidopsis thaliana GN=At3g12390 PE=1 SV=1	1.407	Up	At3g12390	17.7	21.982	27.105	2	2	1	0	2	0	1	2	2	1	1	1	6475300	9111300	7589900	0.838	1.179	0.982
Q1H595	Sm-like protein LSM2 OS=Arabidopsis thaliana GN=LSM2 PE=1 SV=1	1.828	Up	LSM2	43	10.694	23.79	7	3	3	1	4	2	2	3	2	2	3	2	29059000	53154000	29048000	0.784	1.433	0.783
P93654	Syntaxin-22 OS=Arabidopsis thaliana GN=SYP22 PE=1 SV=1	1.341	Up	SYP22	34.3	29.481	110.46	21	8	8	8	5	8	7	8	8	7	8	8	287400000	385400000	396940000	0.806	1.081	1.113
Q9SJZ7	Chaperone protein dnaJ A6, chloroplastic OS=Arabidopsis thaliana GN=DJA6 PE=2 SV=2	1.21	Up	DJA6	18.8	47.761	54.752	19	7	4	7	5	7	7	7	7	4	4	4	137890000	166850000	157530000	0.895	1.083	1.022
Q94B35	4-hydroxy-3-methylbut-2-enyl diphosphate reductase, chloroplastic OS=Arabidopsis thaliana GN=ISPH PE=2 SV=1	1.242	Up	ISPH	42.9	52.78	168.08	46	17	17	15	15	16	16	17	17	16	17	17	442370000	549250000	487920000	0.897	1.114	0.989
Q9ZPI5	Peroxisomal fatty acid beta-oxidation multifunctional protein MFP2 OS=Arabidopsis thaliana GN=MFP2 PE=1 SV=1	1.33	Up	MFP2	13.2	78.839	59.27	11	7	7	4	4	3	7	5	7	7	5	7	63361000	84317000	55651000	0.935	1.244	0.821
A0A178VFU5	Nuclear transport factor 2 (NTF2) family protein OS=Arabidopsis thaliana GN=At3g09250 PE=4 SV=1	0.68	Down	At3g09250	7.8	26.076	11.265	2	2	2	2	0	0	2	2	2	2	2	2	12666000	8605600	10078000	1.212	0.824	0.964
P93032	Isocitrate dehydrogenase [NAD] regulatory subunit 2, mitochondrial OS=Arabidopsis thaliana GN=IDH2 PE=1 SV=2	1.276	Up	IDH2	28.6	39.59	40.917	14	10	6	4	5	5	8	8	9	4	4	5	77885000	99401000	59675000	0.986	1.258	0.756
Q94A82	Nudix hydrolase 19, chloroplastic OS=Arabidopsis thaliana GN=NUDT19 PE=1 SV=1	1.617	Up	NUDT19	10.3	48.347	25.814	5	4	4	1	4	0	3	4	2	3	4	2	27597000	44643000	25492000	0.847	1.37	0.783
Q8VZH2	Aminopeptidase M1 OS=Arabidopsis thaliana GN=APM1 PE=1 SV=1	1.22	Up	APM1	38.9	98.178	300.81	84	34	34	23	34	27	31	32	29	31	32	29	969830000	1183500000	1037700000	0.912	1.113	0.976
A0A1P8AQX3	Myosin heavy chain, embryonic smooth protein OS=Arabidopsis thaliana GN=YUP8H12.6 PE=4 SV=1	1.302	Up	YUP8H12.6	7.2	76.499	29.977	7	4	4	2	3	2	4	4	4	4	4	4	22684000	29535000	24240000	0.89	1.159	0.951
F4K5C7	40S ribosomal protein S4 OS=Arabidopsis thaliana GN=At5g07090 PE=3 SV=1	1.274	Up	At5g07090	67.2	27.707	133.7	47	16	2	15	15	17	16	15	16	2	2	2	1179800000	1502900000	1474800000	0.851	1.084	1.064
Q9FIJ5	AT5g47860/MCA23_20 OS=Arabidopsis thaliana GN=MCA23.20 PE=2 SV=1	0.829	Down	MCA23.20	14.6	47.786	31.973	4	4	4	2	1	1	3	4	3	3	4	3	72390000	59969000	62618000	1.114	0.923	0.963
Q42112	60S acidic ribosomal protein P0-2 OS=Arabidopsis thaliana GN=RPP0B PE=1 SV=2	1.228	Up	RPP0B	31.6	34.133	102.96	22	8	8	7	7	8	8	8	7	8	8	7	367670000	451910000	440200000	0.876	1.076	1.048
Q9LVM2	NAD(P)H-quinone oxidoreductase subunit N, chloroplastic OS=Arabidopsis thaliana GN=ndhN PE=2 SV=1	0.767	Down	ndhN	39.7	23.398	58.324	14	7	7	5	5	4	6	6	6	6	6	6	272280000	208970000	263910000	1.096	0.841	1.062
Q9SSA5	Peptidyl-prolyl cis-trans isomerase CYP38, chloroplastic OS=Arabidopsis thaliana GN=CYP38 PE=1 SV=1	0.713	Down	CYP38	53.3	47.981	323.31	100	18	18	34	32	34	18	18	18	18	18	18	6963000000	4963300000	5376100000	1.207	0.861	0.932
Q9FLC0	Peroxidase 52 OS=Arabidopsis thaliana GN=PER52 PE=2 SV=1	0.457	Down	PER52	17.9	34.215	38.594	10	4	4	4	0	6	4	2	4	4	2	4	57391000	26232000	69606000	1.124	0.514	1.363
Q9SY97	Photosystem I chlorophyll a/b-binding protein 3-1, chloroplastic OS=Arabidopsis thaliana GN=LHCA3 PE=1 SV=1	0.739	Down	LHCA3	27.5	29.181	95.89	62	7	7	23	18	21	7	7	7	7	7	7	15564000000	11499000000	12463000000	1.181	0.873	0.946
Q9LPT6	F11F12.1 protein OS=Arabidopsis thaliana GN=F11F12.1 PE=1 SV=1	2.176	Up	F11F12.1	19.2	23.425	31.106	7	4	4	0	4	3	3	4	4	3	4	4	39481000	85868000	45237000	0.694	1.51	0.796
F4JCZ8	DUF1499 family protein OS=Arabidopsis thaliana GN=At3g60810 PE=4 SV=1	1.238	Up	At3g60810	22	23.955	52.113	7	4	4	1	3	3	4	3	3	4	3	3	55461000	68721000	71154000	0.852	1.055	1.093
Q9SL05	Protein PROTON GRADIENT REGULATION 5, chloroplastic OS=Arabidopsis thaliana GN=PGR5 PE=1 SV=1	0.647	Down	PGR5	18.8	14.293	26.821	9	2	2	4	3	2	2	2	2	2	2	2	298930000	193560000	249740000	1.208	0.782	1.009
O22957	Apoptosis inhibitory protein 5 (API5) OS=Arabidopsis thaliana GN=At2g34040 PE=1 SV=2	1.21	Up	At2g34040	27.1	61.644	89.864	26	13	13	7	10	9	10	12	11	10	12	11	170300000	205820000	164290000	0.945	1.143	0.912
Q9FI78	Shikimate O-hydroxycinnamoyltransferase OS=Arabidopsis thaliana GN=HST PE=1 SV=1	1.815	Up	HST	9.2	47.974	20.617	2	3	3	0	2	0	3	3	2	3	3	2	21583000	39200000	18992000	0.812	1.474	0.714
Q9S829	NAD(P)H-quinone oxidoreductase subunit O, chloroplastic OS=Arabidopsis thaliana GN=ndhO PE=2 SV=1	0.731	Down	ndhO	25.9	17.657	61.26	19	6	6	6	7	6	5	5	5	5	5	5	585820000	427770000	424110000	1.222	0.893	0.885
Q2V3X5	AT3G08780 protein OS=Arabidopsis thaliana GN=At3g08780 PE=1 SV=1	0.441	Down	At3g08780	6.4	34.281	13.291	3	2	2	1	1	1	2	2	2	2	2	2	16076000	7090800	7471300	1.574	0.694	0.732
A0A1P8AWL7	Glycosyl hydrolases family 32 protein OS=Arabidopsis thaliana GN=At1g62660 PE=3 SV=1	0.412	Down	At1g62660	24.5	53.274	58.99	12	9	7	4	2	6	8	8	9	6	6	7	260640000	107570000	390380000	1.031	0.425	1.544
Q8LBU2	Probable glutathione peroxidase 8 OS=Arabidopsis thaliana GN=GPX8 PE=2 SV=1	1.478	Up	GPX8	24	19.067	48.091	6	3	3	1	3	2	3	3	3	3	3	3	34867000	51583000	30212000	0.897	1.326	0.777
Q93VK5	Protein LUTEIN DEFICIENT 5, chloroplastic OS=Arabidopsis thaliana GN=CYP97A3 PE=1 SV=1	2.069	Up	CYP97A3	7.6	66.845	21.94	4	3	3	0	2	2	3	3	3	3	3	3	54203000	112140000	182620000	0.466	0.964	1.57
F4K7E0	Nuclear transport factor 2 (NTF2) family protein with RNA binding (RRM-RBD-RNP motifs) domain-containing protein OS=Arabidopsis thaliana GN=MRH10.6 PE=4 SV=1	1.438	Up	MRH10.6	25.8	43.484	77.958	17	8	8	6	7	4	7	8	8	7	8	8	172230000	247640000	177510000	0.865	1.244	0.891
P34789	40S ribosomal protein S28-2 OS=Arabidopsis thaliana GN=RPS28C PE=3 SV=1	0.796	Down	RPS28C	29.7	7.3404	13.058	7	2	1	2	3	2	2	2	2	1	1	1	269090000	214400000	153890000	1.267	1.009	0.724
Q93Z34	Alpha/beta-Hydrolases superfamily protein OS=Arabidopsis thaliana GN=At2g24280 PE=2 SV=1	0.73	Down	At2g24280	20.9	56.232	63.501	26	10	10	10	5	11	10	10	9	10	10	9	234470000	171100000	254140000	1.066	0.778	1.156
Q42438	Calcium-dependent protein kinase 8 OS=Arabidopsis thaliana GN=CPK8 PE=1 SV=1	2.472	Up	CPK8	6.6	59.94	11.77	2	4	2	0	2	0	4	4	3	2	2	1	6422800	15890000	0	0.576	1.424
P93042	Protein ROOT HAIR DEFECTIVE 3 OS=Arabidopsis thaliana GN=RHD3 PE=1 SV=1	1.281	Up	RHD3	20.9	89.091	118.25	21	14	14	7	7	7	14	13	13	14	13	13	234460000	300450000	275490000	0.868	1.112	1.02
Q9XI84	[Fructose-bisphosphate aldolase]-lysine N-methyltransferase, chloroplastic OS=Arabidopsis thaliana GN=LSMT-L PE=1 SV=1	1.209	Up	LSMT-L	20.5	54.611	66.542	15	10	10	4	4	7	8	7	10	8	7	10	127760000	154460000	116940000	0.96	1.161	0.879
F4I9J7	RNA-binding protein Y14 OS=Arabidopsis thaliana GN=Y14 PE=1 SV=1	2.955	Up	Y14	7.4	22.438	15.39	6	2	2	1	3	2	1	2	1	1	2	1	45832000	135270000	59081000	0.572	1.69	0.738
Q9LF37	Chaperone protein ClpB3, chloroplastic OS=Arabidopsis thaliana GN=CLPB3 PE=1 SV=1	1.267	Up	CLPB3	42.4	108.94	323.31	102	40	38	31	40	31	38	39	38	36	37	36	902980000	1143800000	868820000	0.929	1.177	0.894
Q9ZSD4	Syntaxin-121 OS=Arabidopsis thaliana GN=SYP121 PE=1 SV=1	1.433	Up	SYP121	30.6	37.956	120.94	20	8	8	5	7	8	8	8	7	8	8	7	244960000	351090000	221620000	0.899	1.288	0.813
Q9FE62	Thioredoxin-like protein YLS8 OS=Arabidopsis thaliana GN=YLS8 PE=2 SV=1	1.706	Up	YLS8	26.1	16.591	52.908	3	2	2	0	2	1	2	2	1	2	2	1	21640000	36942000	0	0.739	1.261
P24806	Xyloglucan endotransglucosylase/hydrolase protein 24 OS=Arabidopsis thaliana GN=XTH24 PE=1 SV=2	1.535	Up	XTH24	46.8	30.755	190.13	26	10	10	8	10	8	10	8	10	10	8	10	758860000	1164500000	622530000	0.894	1.372	0.734
O64517	Metacaspase-4 OS=Arabidopsis thaliana GN=AMC4 PE=1 SV=1	1.458	Up	AMC4	23	45.483	51.13	14	7	7	5	6	3	6	7	5	6	7	5	200130000	291820000	226310000	0.836	1.219	0.945
F4JPZ7	Peptidase M20/M25/M40 family protein OS=Arabidopsis thaliana GN=At4g17830 PE=4 SV=1	1.484	Up	At4g17830	28.8	48.742	105.2	17	8	8	6	7	4	7	8	7	7	8	7	192390000	285640000	177450000	0.881	1.307	0.812
Q9LJR2	Lectin-like protein LEC OS=Arabidopsis thaliana GN=LEC PE=1 SV=1	0.8	Down	LEC	59	29.749	135.76	22	11	7	8	7	7	10	11	9	6	7	5	1834200000	1467900000	1414700000	1.167	0.934	0.9
Q42560	Aconitate hydratase 1 OS=Arabidopsis thaliana GN=ACO1 PE=1 SV=2	1.206	Up	ACO1	40	98.151	161.36	66	30	19	20	25	21	28	30	28	18	19	18	771330000	930140000	859630000	0.904	1.09	1.007
Q9M8T0	Probable inactive receptor kinase At3g02880 OS=Arabidopsis thaliana GN=At3g02880 PE=1 SV=1	1.282	Up	At3g02880	20.3	67.752	147.1	17	9	8	6	6	5	9	7	8	8	6	7	139620000	178860000	168950000	0.859	1.101	1.04
O23627	Glycine--tRNA ligase, mitochondrial 1 OS=Arabidopsis thaliana GN=At1g29880 PE=1 SV=1	1.374	Up	At1g29880	35	81.943	323.31	72	26	26	22	26	24	24	26	23	24	26	23	794890000	1091900000	856020000	0.869	1.194	0.936
P57720	Chorismate synthase, chloroplastic OS=Arabidopsis thaliana GN=EMB1144 PE=2 SV=2	1.223	Up	EMB1144	31.7	47.317	108.22	26	11	11	7	11	8	11	10	10	11	10	10	321260000	393030000	382580000	0.879	1.075	1.046
P25864	50S ribosomal protein L9, chloroplastic OS=Arabidopsis thaliana GN=RPL9 PE=2 SV=1	0.831	Down	RPL9	57.4	22.134	102.82	43	13	13	16	12	15	13	13	13	13	13	13	1102100000	915990000	1012700000	1.091	0.907	1.002
F4IJM1	63 kDa inner membrane family protein OS=Arabidopsis thaliana GN=ALB3 PE=1 SV=1	1.308	Up	ALB3	8.6	47.071	21.348	6	3	3	1	2	3	3	3	3	3	3	3	58938000	77107000	80276000	0.817	1.069	1.113
Q501E6	Flotillin-like protein 1 OS=Arabidopsis thaliana GN=FLOT1 PE=2 SV=1	4.925	Up	FLOT1	38.7	52.309	118.37	20	13	6	2	16	2	10	13	8	5	6	4	244220000	1201700000	221500000	0.439	2.162	0.399
F4J270	Probable glucan endo-1,3-beta-glucosidase BG3 OS=Arabidopsis thaliana GN=BG3 PE=2 SV=1	4.273	Up	BG3	70.1	37.631	260.84	33	15	15	8	19	6	11	15	10	11	15	10	443270000	1892800000	376010000	0.49	2.094	0.416
O48782	Heme oxygenase 1, chloroplastic OS=Arabidopsis thaliana GN=HO1 PE=1 SV=2	1.613	Up	HO1	32.6	32.691	71.793	25	9	9	6	12	7	6	9	6	6	9	6	394370000	636280000	411690000	0.82	1.323	0.856
F4IAG1	Starch synthase 3 OS=Arabidopsis thaliana GN=SS3 PE=3 SV=1	0.597	Down	SS3	3.1	124.23	25.267	4	3	3	1	1	2	3	3	3	3	3	3	25670000	15325000	27319000	1.127	0.673	1.2
Q9C8K8	Putative uncharacterized protein At1g51560 OS=Arabidopsis thaliana GN=At1g51560 PE=2 SV=1	0.518	Down	At1g51560	6.4	43.582	15.191	4	2	2	2	1	1	2	2	2	2	2	2	26499000	13708000	15538000	1.426	0.738	0.836
Q9S7W1	Chlorophyll a-b binding protein CP29.3, chloroplastic OS=Arabidopsis thaliana GN=LHCB4.3 PE=2 SV=1	0.7	Down	LHCB4.3	46.7	30.211	65.55	14	7	6	6	4	4	6	7	6	5	6	5	463970000	325030000	420370000	1.151	0.806	1.043
Q9FMR9	RuvB-like protein 1 OS=Arabidopsis thaliana GN=RIN1 PE=1 SV=1	2.631	Up	RIN1	9.8	50.323	26.237	5	4	4	1	3	1	4	4	3	4	4	3	13829000	36372000	13007000	0.656	1.726	0.617
C0Z2J1	AT1G11360 protein OS=Arabidopsis thaliana GN=At1g11360 PE=1 SV=1	1.833	Up	At1g11360	19.4	26.508	27.211	6	4	4	1	3	2	2	3	3	2	3	3	16383000	30036000	16573000	0.78	1.43	0.789
Q9ZV85	Probable gamma-glutamyl hydrolase 3 OS=Arabidopsis thaliana GN=GGH3 PE=2 SV=1	0.411	Down	GGH3	21.3	39.882	36.297	6	7	6	4	0	2	7	5	7	6	4	6	78416000	32249000	52777000	1.439	0.592	0.969
Q9SYP2	Pyrophosphate--fructose 6-phosphate 1-phosphotransferase subunit alpha 1 OS=Arabidopsis thaliana GN=PFP-ALPHA1 PE=2 SV=1	0.795	Down	PFP-ALPHA1	21.3	67.118	65.26	14	10	5	5	2	7	9	7	9	4	3	4	75525000	60039000	70971000	1.097	0.872	1.031
A0A1P8ARZ0	THO2 OS=Arabidopsis thaliana GN=THO2 PE=1 SV=1	1.726	Up	THO2	1.3	184.34	11.421	4	2	2	1	2	1	2	2	2	2	2	2	14783000	25526000	13474000	0.825	1.424	0.752
Q8LGG8	Universal stress protein A-like protein OS=Arabidopsis thaliana GN=At3g01520 PE=1 SV=2	1.436	Up	At3g01520	33.1	19.568	46.028	13	6	6	6	3	4	5	6	5	5	6	5	158630000	227860000	115600000	0.948	1.361	0.691
F4IKM1	Tropinone reductase homolog At2g29340 OS=Arabidopsis thaliana GN=At2g29340 PE=2 SV=1	0.623	Down	At2g29340	30	32.899	79.338	17	6	6	5	6	6	5	6	5	5	6	5	189780000	118220000	180820000	1.165	0.726	1.11
A0A1P8ANX8	Vacuolar H+-ATPase subunit E isoform 3 OS=Arabidopsis thaliana GN=VHA-E3 PE=3 SV=1	1.686	Up	VHA-E3	46	27.181	25.925	5	11	2	1	1	3	11	11	9	2	2	2	32805000	55286000	66401000	0.637	1.074	1.289
Q93ZE8	Stromal cell-derived factor 2-like protein OS=Arabidopsis thaliana GN=SDF2 PE=1 SV=1	1.505	Up	SDF2	12.8	23.935	14.188	6	2	2	2	3	1	1	2	1	1	2	1	21770000	32778000	16156000	0.924	1.391	0.686
Q8VYF1	60S ribosomal protein L15-2 OS=Arabidopsis thaliana GN=RPL15B PE=2 SV=1	1.449	Up	RPL15B	34.8	24.239	55.096	11	7	7	3	4	4	6	7	7	6	7	7	220940000	320270000	321200000	0.769	1.114	1.117
Q9SIU0	NAD-dependent malic enzyme 1, mitochondrial OS=Arabidopsis thaliana GN=NAD-ME1 PE=1 SV=1	1.363	Up	NAD-ME1	37.2	69.655	152.22	31	19	19	11	15	5	17	19	16	17	19	16	444310000	605930000	403830000	0.917	1.25	0.833
Q9LDI9	At1g69250 OS=Arabidopsis thaliana GN=F23O10.17 PE=1 SV=1	1.5	Up	F23O10.17	13.6	46.674	58.059	3	3	3	0	2	1	3	3	3	3	3	3	16085000	24117000	14731000	0.878	1.317	0.804
Q9M1D0	Beta-glucosidase 16 OS=Arabidopsis thaliana GN=BGLU16 PE=2 SV=1	1.713	Up	BGLU16	5.6	58.042	17.602	8	3	3	2	3	3	2	3	3	2	3	3	19126000	32775000	28143000	0.717	1.228	1.055
Q9LYG2	Classical AGP protein OS=Arabidopsis thaliana GN=At5g11680 PE=2 SV=1	1.242	Up	At5g11680	11.6	23.106	18.379	6	2	2	2	2	2	2	2	2	2	2	2	58860000	73078000	58761000	0.926	1.15	0.924
O23016	Probable voltage-gated potassium channel subunit beta OS=Arabidopsis thaliana GN=KAB1 PE=1 SV=1	0.828	Down	KAB1	51.8	36.538	130.98	28	14	14	8	9	11	13	13	13	13	13	13	817310000	676910000	819990000	1.06	0.878	1.063
Q9LIS3	UDP-glucuronate 4-epimerase 6 OS=Arabidopsis thaliana GN=GAE6 PE=1 SV=1	1.324	Up	GAE6	4.8	50.569	12.005	2	2	2	2	0	0	2	2	2	2	2	2	10274000	13604000	15147000	0.79	1.046	1.164
Q9LVV5	Thylakoid lumenal 15.0 kDa protein 2, chloroplastic OS=Arabidopsis thaliana GN=At5g52970 PE=1 SV=2	0.65	Down	At5g52970	20.2	24.569	19.706	6	3	3	2	3	1	3	3	3	3	3	3	314180000	204280000	297230000	1.156	0.751	1.093
Q9S831	Photosystem I reaction center subunit IV A, chloroplastic OS=Arabidopsis thaliana GN=PSAE1 PE=1 SV=1	0.675	Down	PSAE1	55.9	14.967	97.009	100	7	4	40	23	37	7	7	7	4	4	4	24557000000	16587000000	23051000000	1.148	0.775	1.077
Q38885	Preprotein translocase subunit SCY1, chloroplastic OS=Arabidopsis thaliana GN=SCY1 PE=1 SV=2	1.24	Up	SCY1	8.3	59.492	29.913	9	4	4	4	1	4	4	4	4	4	4	4	49881000	61817000	72722000	0.811	1.006	1.183
Q9LPU8	Indole glucosinolate O-methyltransferase 4 OS=Arabidopsis thaliana GN=IGMT4 PE=1 SV=1	28.701	Up	IGMT4	26.5	40.747	106.9	9	8	8	0	9	0	2	8	2	2	8	2	8257200	236000000	10045000	0.097	2.784	0.119
Q8VZP3	Putative uncharacterized protein At2g35810 OS=Arabidopsis thaliana GN=At2g35810 PE=2 SV=1	1.842	Up	At2g35810	40.2	22.028	67.901	7	5	3	2	3	2	5	5	5	3	3	3	75930000	139900000	72160000	0.791	1.457	0.752
Q94A97	Ubiquitin-conjugating enzyme E2 35 OS=Arabidopsis thaliana GN=UBC35 PE=1 SV=1	1.664	Up	UBC35	79.7	17.192	39.92	10	10	2	3	4	3	10	10	10	2	2	2	88119000	146650000	84488000	0.828	1.378	0.794
Q9ZUF4	Serine/threonine-protein kinase RIPK OS=Arabidopsis thaliana GN=RIPK PE=1 SV=1	2.091	Up	RIPK	4.1	51.7	14.989	5	2	1	1	3	1	2	2	1	1	1	0	21312000	44587000	0	0.647	1.353
F4JJI7	PapD-like superfamily protein OS=Arabidopsis thaliana GN=At4g21450 PE=1 SV=1	1.55	Up	At4g21450	6.4	35.187	13.529	7	2	2	2	3	2	2	2	2	2	2	2	16645000	25810000	21304000	0.783	1.214	1.002
Q9C5J8	Outer envelope protein 80, chloroplastic OS=Arabidopsis thaliana GN=OEP80 PE=2 SV=1	0.603	Down	OEP80	7.5	79.935	25.146	6	4	4	5	0	1	4	3	3	4	3	3	44327000	26751000	32020000	1.29	0.778	0.932
Q9M1X0	Ribosome-recycling factor, chloroplastic OS=Arabidopsis thaliana GN=RRF PE=2 SV=2	0.77	Down	RRF	44.4	30.422	323.31	56	16	16	19	18	19	15	14	15	15	14	15	4396700000	3388600000	4298400000	1.092	0.841	1.067
Q39026	Mitogen-activated protein kinase 6 OS=Arabidopsis thaliana GN=MPK6 PE=1 SV=1	1.474	Up	MPK6	18.7	45.057	39.041	8	6	5	3	3	2	6	6	6	5	5	5	70321000	103680000	71953000	0.858	1.265	0.878
P32068	Anthranilate synthase alpha subunit 1, chloroplastic OS=Arabidopsis thaliana GN=ASA1 PE=1 SV=1	1.346	Up	ASA1	27.1	66.311	120.76	30	13	11	10	12	8	13	13	12	11	11	10	237450000	319750000	204250000	0.936	1.26	0.805
Q8LDW8	Probable hydroxyacylglutathione hydrolase 2, chloroplastic OS=Arabidopsis thaliana GN=GLX2-4 PE=2 SV=1	1.488	Up	GLX2-4	37.2	36.625	93.39	20	9	7	5	8	7	7	8	6	6	6	6	198520000	295540000	198590000	0.86	1.28	0.86
Q8L970	Probable prolyl 4-hydroxylase 7 OS=Arabidopsis thaliana GN=P4H7 PE=2 SV=1	1.975	Up	P4H7	23.7	35.57	40.498	10	5	5	2	6	2	3	5	2	3	5	2	19644000	38798000	27603000	0.685	1.353	0.962
Q9LF68	Protein BOLA4, chloroplastic/mitochondrial OS=Arabidopsis thaliana GN=BOLA4 PE=1 SV=1	1.205	Up	BOLA4	44.6	19.538	117.24	10	5	5	2	4	4	4	4	5	4	4	5	152630000	183810000	108060000	1.03	1.241	0.729
Q9C5J7	ATP-dependent 6-phosphofructokinase 7 OS=Arabidopsis thaliana GN=PFK7 PE=1 SV=1	1.339	Up	PFK7	19.2	53.481	60.254	17	8	4	5	6	6	6	8	7	4	4	4	63987000	85683000	90625000	0.799	1.07	1.131
Q9FW48	Leucine-rich repeat (LRR) family protein OS=Arabidopsis thaliana GN=At1g33600 PE=4 SV=1	0.819	Down	At1g33600	29.5	52.47	87.223	20	12	11	6	6	8	12	10	11	11	9	10	364470000	298490000	340800000	1.089	0.892	1.019
O64757	Disease resistance family protein / LRR family protein OS=Arabidopsis thaliana GN=At2g34930 PE=2 SV=1	1.21	Up	At2g34930	4.1	100.28	17.83	3	3	2	1	0	2	3	3	3	2	2	2	14464000	17493000	55683000	0.495	0.599	1.906
Q9LNJ3	Aspartyl protease family protein 2 OS=Arabidopsis thaliana GN=APF2 PE=2 SV=1	1.358	Up	APF2	15.7	52.175	48.522	13	8	7	3	5	5	7	8	7	6	7	6	1759600000	2388300000	2170600000	0.835	1.134	1.031
Q9FL69	Probable ADP-ribosylation factor GTPase-activating protein AGD5 OS=Arabidopsis thaliana GN=AGD5 PE=1 SV=1	2.25	Up	AGD5	8.7	52.592	21.021	4	3	3	2	2	0	2	3	3	2	3	3	18015000	40516000	15181000	0.733	1.649	0.618
Q9S9P1	40S ribosomal protein S12-1 OS=Arabidopsis thaliana GN=RPS12A PE=2 SV=1	1.399	Up	RPS12A	53.5	15.377	46.046	17	7	4	6	7	4	7	7	7	4	4	4	192950000	270040000	220620000	0.847	1.185	0.968
Q9S7P9	SNAP25 homologous protein SNAP33 OS=Arabidopsis thaliana GN=SNAP33 PE=1 SV=1	2.791	Up	SNAP33	20	33.644	35.242	7	4	4	1	5	1	3	4	4	3	4	4	34642000	96720000	26120000	0.66	1.842	0.498
Q9LVA4	Plant invertase/pectin methylesterase inhibitor superfamily protein OS=Arabidopsis thaliana GN=MMI9.18 PE=2 SV=1	0.736	Down	MMI9.18	20.8	22.179	41.022	12	4	4	5	2	5	4	4	4	4	4	4	81886000	60262000	128290000	0.908	0.668	1.423
O22607	WD-40 repeat-containing protein MSI4 OS=Arabidopsis thaliana GN=MSI4 PE=1 SV=3	1.287	Up	MSI4	46.5	55.758	323.31	40	14	14	13	18	9	13	14	10	13	14	10	389350000	501080000	338900000	0.95	1.223	0.827
F4IXW2	Brefeldin A-inhibited guanine nucleotide-exchange protein 5 OS=Arabidopsis thaliana GN=BIG5 PE=1 SV=2	1.283	Up	BIG5	9.5	192.88	130.64	22	12	12	7	9	6	9	10	10	9	10	10	104060000	133530000	125440000	0.86	1.103	1.037
Q9ZU23	Jacalin-related lectin 5 OS=Arabidopsis thaliana GN=JAL5 PE=2 SV=1	0.235	Down	JAL5	29.9	73.938	323.31	37	16	15	17	3	17	15	10	14	14	9	13	987900000	232370000	1250300000	1.2	0.282	1.518
A0A1P8BES4	Cleavage and polyadenylation specificity factor 160 OS=Arabidopsis thaliana GN=CPSF160 PE=4 SV=1	1.417	Up	CPSF160	3.6	135.29	26.806	4	4	4	1	1	2	4	4	4	4	4	4	19322000	27379000	24430000	0.815	1.155	1.03
P23686	S-adenosylmethionine synthase 1 OS=Arabidopsis thaliana GN=SAM1 PE=1 SV=2	1.673	Up	SAM1	46.8	43.158	75.999	22	18	3	7	7	8	18	18	18	3	3	3	318500000	533280000	344510000	0.799	1.337	0.864
A8MRP2	AIG2-like protein D OS=Arabidopsis thaliana GN=AIG2LD PE=2 SV=1	1.75	Up	AIG2LD	47.4	17.484	87.681	12	6	6	4	5	3	6	6	6	6	6	6	154220000	269890000	163180000	0.788	1.379	0.834
Q9FZA2	Non-classical arabinogalactan protein 31 OS=Arabidopsis thaliana GN=AGP31 PE=1 SV=1	1.998	Up	AGP31	6.4	38.488	12.983	6	2	2	2	2	2	2	2	2	2	2	2	14510000	29001000	36257000	0.546	1.091	1.364
Q9ZSA2	Calcium-dependent protein kinase 21 OS=Arabidopsis thaliana GN=CPK21 PE=1 SV=1	1.455	Up	CPK21	15.1	59.894	35.848	11	6	5	3	5	3	6	6	6	5	5	5	46666000	67923000	50879000	0.846	1.231	0.922
Q9FHY8	Protein HLB1 OS=Arabidopsis thaliana GN=HLB1 PE=1 SV=1	1.712	Up	HLB1	12.4	62.397	73.27	16	8	8	6	6	4	7	8	6	7	8	6	116750000	199870000	131730000	0.781	1.337	0.881
B9DH36	AT1G17890 protein OS=Arabidopsis thaliana GN=GER2 PE=2 SV=1	1.321	Up	GER2	23.4	35.421	82.001	12	7	7	5	4	3	7	5	6	7	5	6	108670000	143630000	106500000	0.909	1.201	0.89
Q8H114	Appr-1-p processing enzyme family protein OS=Arabidopsis thaliana GN=At2g40600 PE=1 SV=1	1.346	Up	At2g40600	33.5	27.478	135.21	17	6	6	7	6	4	6	4	4	6	4	4	257270000	346490000	242000000	0.913	1.229	0.858
A0A1P8AWT7	Catalase 3 OS=Arabidopsis thaliana GN=CAT3 PE=1 SV=1	1.227	Up	CAT3	50.1	63.559	286.27	98	24	18	35	36	27	24	24	22	18	18	16	6630600000	8136200000	7187600000	0.906	1.112	0.982
P42734	Probable cinnamyl alcohol dehydrogenase 9 OS=Arabidopsis thaliana GN=CAD9 PE=2 SV=2	0.824	Down	CAD9	46.4	38.933	160.15	31	13	13	11	7	13	12	11	13	12	11	13	354640000	292420000	369230000	1.047	0.863	1.09
Q9ZUT9	40S ribosomal protein S5-1 OS=Arabidopsis thaliana GN=RPS5A PE=1 SV=1	1.24	Up	RPS5A	37.7	22.99	94.294	45	10	2	16	15	14	10	10	10	2	2	2	813880000	1008600000	911100000	0.893	1.107	1
Q93XW5	Nitrile-specifier protein 5 OS=Arabidopsis thaliana GN=NSP5 PE=2 SV=1	2.193	Up	NSP5	38.7	35.853	96.304	36	12	12	11	16	9	12	12	10	12	12	10	151770000	332720000	152170000	0.715	1.568	0.717
Q8H126	Putative uncharacterized protein At5g13030 OS=Arabidopsis thaliana GN=At5g13030 PE=1 SV=1	1.266	Up	At5g13030	24.8	71.097	164.88	31	15	15	9	13	9	13	15	14	13	15	14	246650000	312140000	267170000	0.896	1.134	0.97
O82462	Glutamate--tRNA ligase, cytoplasmic OS=Arabidopsis thaliana GN=At5g26710 PE=1 SV=1	1.698	Up	At5g26710	5.3	81.064	23.587	5	4	4	1	2	2	4	4	3	4	4	3	25805000	43817000	24681000	0.821	1.394	0.785
Q9FPH2	AT5g02160 OS=Arabidopsis thaliana GN=At5g02160 PE=2 SV=1	0.57	Down	At5g02160	17.1	13.378	33.609	18	4	4	5	6	7	4	4	4	4	4	4	849480000	484380000	758740000	1.218	0.694	1.088
F4KBV2	Polyadenylate-binding protein 1 OS=Arabidopsis thaliana GN=PABN1 PE=4 SV=1	1.342	Up	PABN1	24.6	16.247	25.02	2	2	2	0	2	0	2	2	1	2	2	1	14725000	19743000	0	0.854	1.146
Q93ZC5	Allene oxide cyclase 4, chloroplastic OS=Arabidopsis thaliana GN=AOC4 PE=2 SV=1	0.543	Down	AOC4	39.8	27.809	99.478	22	8	6	9	4	9	8	8	8	6	6	6	331960000	180420000	343650000	1.163	0.632	1.204
Q9LQZ4	At1g75700 OS=Arabidopsis thaliana GN=At1g75510 PE=2 SV=1	3.208	Up	At1g75510	24.5	29.711	35.351	7	5	5	1	4	2	4	4	4	4	4	4	21395000	68642000	21049000	0.578	1.854	0.568
Q940I2	Putative uncharacterized protein MED24.18 OS=Arabidopsis thaliana GN=MED24.18 PE=2 SV=1	0.754	Down	MED24.18	37.5	37.04	74.661	18	8	8	6	6	6	8	8	8	8	8	8	385790000	291070000	419480000	1.056	0.796	1.148
A0A1R7T3A4	Zincin-like metalloproteases family protein OS=Arabidopsis thaliana GN=OOP PE=3 SV=1	1.267	Up	OOP	31.2	90.368	197.2	51	22	9	16	17	18	22	19	22	9	8	9	863460000	1093600000	1051000000	0.861	1.091	1.048
Q42044	At2g45180 OS=Arabidopsis thaliana GN=At2g45180 PE=2 SV=2	0.483	Down	At2g45180	17.9	13.955	31.852	11	3	3	4	4	3	3	2	2	3	2	2	679150000	328320000	656090000	1.225	0.592	1.183
Q9LYE7	Putative uncharacterized protein At5g11420 OS=Arabidopsis thaliana GN=At5g11420 PE=1 SV=1	0.808	Down	At5g11420	38	39.64	95.887	49	14	6	13	16	20	12	12	14	6	6	6	2910300000	2351100000	3390700000	1.009	0.815	1.176
Q93Z25	Probable pectate lyase 22 OS=Arabidopsis thaliana GN=At5g63180 PE=2 SV=1	0.726	Down	At5g63180	24.5	47.894	69.057	17	8	7	6	4	7	7	5	8	7	5	7	79912000	58025000	82596000	1.087	0.789	1.124
Q9SR70	Peptidyl-prolyl cis-trans isomerase FKBP16-4, chloroplastic OS=Arabidopsis thaliana GN=FKBP16-4 PE=1 SV=1	0.712	Down	FKBP16-4	31.7	24.504	74.533	24	7	7	7	8	9	6	7	7	6	7	7	847520000	603480000	718350000	1.172	0.835	0.993
F4I7I0	Alanine aminotransferase 1, mitochondrial OS=Arabidopsis thaliana GN=ALAAT1 PE=1 SV=1	1.325	Up	ALAAT1	45.7	59.82	293.64	76	20	14	24	28	24	20	20	20	14	14	14	2303400000	3053000000	1910200000	0.951	1.26	0.789
Q8GWV1	At1g78915 OS=Arabidopsis thaliana GN=At1g78915 PE=2 SV=1	0.736	Down	At1g78915	14	42.579	32.45	9	5	5	4	3	2	4	5	4	4	5	4	148820000	109600000	108270000	1.218	0.897	0.886
Q93Z53	Plastidial pyruvate kinase 3, chloroplastic OS=Arabidopsis thaliana GN=PKP3 PE=1 SV=1	0.664	Down	PKP3	14.4	62.614	45.002	12	7	5	3	5	4	7	7	7	5	5	5	83831000	55717000	55446000	1.29	0.857	0.853
Q9SIE1	Bifunctional aspartate aminotransferase and glutamate/aspartate-prephenate aminotransferase OS=Arabidopsis thaliana GN=PAT PE=1 SV=2	1.237	Up	PAT	18.1	50.999	48.848	14	7	7	3	5	6	6	7	6	6	7	6	72483000	89707000	81174000	0.894	1.106	1.001
Q9SRH6	Hypersensitive-induced response protein 3 OS=Arabidopsis thaliana GN=HIR3 PE=1 SV=1	3.158	Up	HIR3	42.5	31.321	82.78	24	10	8	8	9	7	9	10	9	7	8	7	457840000	1445600000	408020000	0.594	1.876	0.53
Q9LFX8	Glycine-rich protein OS=Arabidopsis thaliana GN=At1g27090 PE=1 SV=1	1.371	Up	At1g27090	26.4	46.018	115.32	20	8	8	7	8	5	6	8	6	6	8	6	229520000	314790000	259280000	0.857	1.175	0.968
Q9ZV24	Outer envelope pore protein 16-1, chloroplastic OS=Arabidopsis thaliana GN=OEP161 PE=1 SV=1	0.603	Down	OEP161	62.8	15.482	58.566	28	7	7	9	8	11	7	7	7	7	7	7	1375700000	828740000	1278200000	1.185	0.714	1.101
Q8RWN9	Dihydrolipoyllysine-residue acetyltransferase component 2 of pyruvate dehydrogenase complex, mitochondrial OS=Arabidopsis thaliana GN=At3g13930 PE=1 SV=2	0.67	Down	At3g13930	46.2	58.467	257.28	65	20	17	26	17	22	19	20	19	16	17	16	2377400000	1593100000	2107300000	1.173	0.786	1.04
P56767	Photosystem I P700 chlorophyll a apoprotein A2 OS=Arabidopsis thaliana GN=psaB PE=3 SV=1	0.697	Down	psaB	24.8	82.474	244.79	171	17	17	57	50	64	17	17	17	17	17	17	17141000000	11959000000	17075000000	1.114	0.777	1.109
P48482	Serine/threonine-protein phosphatase PP1 isozyme 2 OS=Arabidopsis thaliana GN=TOPP2 PE=1 SV=1	1.433	Up	TOPP2	24.4	35.531	46.29	10	7	2	1	6	3	6	7	4	2	2	1	75837000	108660000	81632000	0.855	1.225	0.92
Q42600	Cytochrome P450 84A1 OS=Arabidopsis thaliana GN=CYP84A1 PE=1 SV=1	1.25	Up	CYP84A1	3.5	58.72	11.439	5	2	2	1	2	2	2	2	2	2	2	2	17282000	21605000	19693000	0.885	1.106	1.009
P31265	Translationally-controlled tumor protein 1 OS=Arabidopsis thaliana GN=TCTP1 PE=1 SV=2	1.289	Up	TCTP1	66.1	18.91	116.13	38	10	10	11	14	13	10	9	10	10	9	10	4250500000	5482500000	4254100000	0.912	1.176	0.912
Q9M1G8	DJ-1 protein homolog F OS=Arabidopsis thaliana GN=DJ1F PE=1 SV=1	0.443	Down	DJ1F	12.8	43.142	34.245	9	5	4	3	1	5	3	3	5	2	2	4	168640000	74694000	202170000	1.136	0.503	1.361
Q9FIW4	Beta-glucosidase 42 OS=Arabidopsis thaliana GN=BGLU42 PE=2 SV=1	1.297	Up	BGLU42	5.1	56.076	16.42	5	3	3	1	2	2	3	2	3	3	2	3	84354000	109450000	96539000	0.872	1.131	0.997
Q8H112	PGR5-like protein 1A, chloroplastic OS=Arabidopsis thaliana GN=PGRL1A PE=1 SV=1	0.617	Down	PGRL1A	34.6	35.721	187.05	31	8	8	10	9	12	8	7	8	8	7	8	1001500000	618470000	804260000	1.239	0.765	0.995
Q9LPU1	Putative uncharacterized protein At1g21065 OS=Arabidopsis thaliana GN=T22I11.11 PE=2 SV=1	1.253	Up	T22I11.11	19.4	23.707	31.461	11	5	5	2	5	4	5	5	4	5	5	4	70231000	88049000	66876000	0.936	1.173	0.891
Q9M8L6	At1g80480 OS=Arabidopsis thaliana GN=PTAC17 PE=2 SV=1	1.249	Up	PTAC17	27	49.487	86.497	24	9	7	6	7	11	8	7	8	6	5	6	107970000	134900000	106700000	0.927	1.158	0.916
A0A1I9LMG6	Beta-1,3-glucanase 2 OS=Arabidopsis thaliana GN=BGL2 PE=3 SV=1	9.489	Up	BGL2	53	39.38	323.31	63	15	15	14	41	8	10	15	12	10	15	12	1362100000	12900000000	517290000	0.276	2.619	0.105
F4IVR2	Heat shock protein 60-2 OS=Arabidopsis thaliana GN=HSP60-2 PE=1 SV=1	0.725	Down	HSP60-2	53.4	61.477	157.32	34	25	12	9	11	14	25	24	25	12	12	12	653860000	474040000	508740000	1.199	0.869	0.933
Q8L518	Probable choline kinase 2 OS=Arabidopsis thaliana GN=At1g74320 PE=2 SV=1	1.718	Up	At1g74320	19.4	41.016	53.852	7	5	5	3	2	2	3	5	5	3	5	5	19811000	34069000	29876000	0.71	1.22	1.07
Q39222	Ras-related protein RABA1b OS=Arabidopsis thaliana GN=RABA1B PE=1 SV=1	0.693	Down	RABA1B	29.2	24.02	19.433	6	6	3	2	2	2	5	6	6	2	3	3	22912000	15888000	25938000	1.062	0.736	1.202
Q8H199	Cysteine-rich receptor-like protein kinase 14 OS=Arabidopsis thaliana GN=CRK14 PE=2 SV=2	3.436	Up	CRK14	5.5	73.937	16.571	4	3	2	1	2	1	3	2	3	2	2	2	13699000	47085000	12360000	0.562	1.931	0.507
Q949U1	Dihomomethionine N-hydroxylase OS=Arabidopsis thaliana GN=CYP79F1 PE=1 SV=1	0.47	Down	CYP79F1	5.2	61.695	17.134	2	3	3	2	0	0	3	2	3	3	2	3	18073000	8493600	11544000	1.423	0.669	0.909
Q56XR7	Rhodanese-like domain-containing protein 4A, chloroplastic OS=Arabidopsis thaliana GN=STR4A PE=2 SV=1	1.708	Up	STR4A	13.6	29.011	19.026	3	3	3	2	1	0	3	3	3	3	3	3	17490000	29855000	29654000	0.681	1.163	1.155
Q8LPR9	Protein TIC110, chloroplastic OS=Arabidopsis thaliana GN=TIC110 PE=1 SV=1	1.272	Up	TIC110	19.5	112.12	157.03	39	19	19	8	16	15	16	17	16	16	17	16	284940000	362630000	299060000	0.903	1.149	0.948
F4KE21	Chloroplastic acetylcoenzyme A carboxylase 1 OS=Arabidopsis thaliana GN=CAC1 PE=4 SV=1	0.651	Down	CAC1	22.8	26.927	114.17	11	4	4	5	4	2	4	4	3	4	4	3	358320000	233180000	174540000	1.403	0.913	0.684
F4I083	Bifunctional inhibitor/lipid-transfer protein/seed storage 2S albumin superfamily protein OS=Arabidopsis thaliana GN=LTPG6 PE=4 SV=1	1.235	Up	LTPG6	12.5	25.034	19.831	10	3	3	3	3	4	3	3	3	3	3	3	212400000	262500000	226430000	0.909	1.123	0.969
P42804	Glutamyl-tRNA reductase 1, chloroplastic OS=Arabidopsis thaliana GN=HEMA1 PE=1 SV=2	1.67	Up	HEMA1	6.6	59.515	21.835	5	3	3	1	2	2	3	3	2	3	3	2	20969000	35005000	17831000	0.852	1.423	0.725
Q8H7F6	Bifunctional monothiol glutaredoxin-S16, chloroplastic OS=Arabidopsis thaliana GN=GRXS16 PE=1 SV=2	1.243	Up	GRXS16	51.2	32.205	177.21	37	12	12	13	12	12	12	11	11	12	11	11	597770000	743290000	624990000	0.912	1.134	0.954
Q9LMQ5	F7H2.13 protein OS=Arabidopsis thaliana GN=At1g15790 PE=1 SV=1	2.651	Up	At1g15790	25.7	20.323	33.998	7	4	4	1	5	1	2	4	2	2	4	2	17735000	46987000	13954000	0.676	1.792	0.532
O49482	Cinnamyl alcohol dehydrogenase 5 OS=Arabidopsis thaliana GN=CAD5 PE=1 SV=1	0.771	Down	CAD5	25.2	38.743	62.288	11	8	8	4	5	2	7	7	6	7	7	6	90543000	69838000	63371000	1.214	0.936	0.85
Q9M336	Uracil phosphoribosyltransferase, chloroplastic OS=Arabidopsis thaliana GN=UPP PE=1 SV=1	0.758	Down	UPP	45.9	32.195	88.335	28	12	12	12	8	8	11	11	12	11	11	12	408230000	309370000	400930000	1.095	0.83	1.075
F4HRH4	Leucine-rich repeat transmembrane protein kinase OS=Arabidopsis thaliana GN=At1g53430 PE=1 SV=1	0.671	Down	At1g53430	3.8	110.23	22.327	2	4	4	1	1	0	4	3	4	4	3	4	30870000	20724000	0	1.197	0.803
Q9LXQ2	At3g44100 OS=Arabidopsis thaliana GN=F26G5_50 PE=2 SV=1	0.823	Down	F26G5_50	18.4	16.07	13.156	5	2	2	1	2	2	2	2	2	2	2	2	453470000	373140000	380710000	1.127	0.927	0.946
Q93VS8	ARM repeat superfamily protein OS=Arabidopsis thaliana GN=emb2734 PE=2 SV=1	1.625	Up	emb2734	4.5	123.82	30.284	7	5	5	1	2	4	3	3	5	3	3	5	12887000	20941000	17591000	0.752	1.222	1.026
Q9LQ55	Dynamin-2B OS=Arabidopsis thaliana GN=DRP2B PE=1 SV=2	1.214	Up	DRP2B	24.8	100.23	167.48	39	20	6	12	14	13	19	19	18	6	6	6	224150000	272160000	268990000	0.879	1.067	1.054
A0A1P8AVI3	Nucleotide-diphospho-sugar transferases superfamily protein OS=Arabidopsis thaliana GN=CKS PE=3 SV=1	0.628	Down	CKS	35.5	34.922	77.049	15	8	8	7	3	5	7	7	7	7	7	7	95771000	60099000	99419000	1.125	0.706	1.168
O82234	Translation initiation factor IF3-2, chloroplastic OS=Arabidopsis thaliana GN=IF3-2 PE=2 SV=1	1.508	Up	IF3-2	26	35.141	45.409	12	8	4	4	6	2	8	8	8	4	4	4	124350000	187530000	149410000	0.809	1.22	0.972
A4GSN8	Nuclear-pore anchor OS=Arabidopsis thaliana GN=NUA PE=1 SV=1	2.393	Up	NUA	4	237.04	49.587	12	8	8	1	8	3	2	8	3	2	8	3	12173000	29149000	26090000	0.542	1.297	1.161
O03983	Probable desiccation-related protein LEA14 OS=Arabidopsis thaliana GN=LEA14 PE=1 SV=1	0.625	Down	LEA14	37.1	16.543	36.886	7	4	4	3	2	2	4	4	4	4	4	4	77267000	48275000	79278000	1.132	0.707	1.161
F4JX83	Tetratricopeptide repeat (TPR)-like superfamily protein OS=Arabidopsis thaliana GN=MNC6.3 PE=4 SV=1	0.816	Down	MNC6.3	27.6	27.225	52.539	43	7	7	15	15	13	7	7	7	7	7	7	1990600000	1624400000	1865800000	1.09	0.889	1.021
P56801	30S ribosomal protein S8, chloroplastic OS=Arabidopsis thaliana GN=rps8 PE=3 SV=1	0.754	Down	rps8	23.9	15.479	37.01	19	4	4	7	6	6	4	4	4	4	4	4	337540000	254670000	336020000	1.091	0.823	1.086
Q9C5Y0	Phospholipase D delta OS=Arabidopsis thaliana GN=PLDDELTA PE=1 SV=2	0.557	Down	PLDDELTA	22.7	98.916	110.25	23	14	14	7	3	13	13	11	14	13	11	14	111670000	62267000	98302000	1.231	0.686	1.083
A0A1P8B9L6	Methylthioalkylmalate synthase 1 OS=Arabidopsis thaliana GN=MAM1 PE=1 SV=1	0.625	Down	MAM1	32.4	58.381	248.42	24	13	13	10	5	9	13	11	11	13	11	11	183280000	114620000	165110000	1.188	0.743	1.07
A8MQE0	P-loop containing nucleoside triphosphate hydrolases superfamily protein OS=Arabidopsis thaliana GN=At1g80380 PE=4 SV=1	0.83	Down	At1g80380	53.6	40.819	323.31	85	20	20	29	30	26	20	20	20	20	20	20	3282600000	2724900000	2987500000	1.095	0.909	0.996
P94072	Germin-like protein subfamily 3 member 3 OS=Arabidopsis thaliana GN=GER3 PE=1 SV=1	0.661	Down	GER3	36.5	21.836	67.709	23	5	5	7	9	7	5	5	5	5	5	5	2739800000	1812500000	2373300000	1.187	0.785	1.028
Q06588	1-aminocyclopropane-1-carboxylate oxidase 4 OS=Arabidopsis thaliana GN=ACO4 PE=1 SV=2	1.432	Up	ACO4	52.9	36.676	165.76	44	12	11	15	16	13	12	11	11	11	10	10	475730000	681530000	416530000	0.907	1.299	0.794
A0A1P8BGK2	Pectinesterase OS=Arabidopsis thaliana GN=PMEPCRF PE=4 SV=1	1.595	Up	PMEPCRF	11.2	68.532	58.809	13	7	6	4	7	2	7	7	6	6	6	5	89815000	143280000	76297000	0.871	1.389	0.74
Q9XFH8	Thioredoxin F1, chloroplastic OS=Arabidopsis thaliana GN=At3g02730 PE=1 SV=2	0.781	Down	At3g02730	29.2	19.325	56.681	26	5	5	9	10	7	5	5	5	5	5	5	2270600000	1773100000	1990500000	1.129	0.882	0.99
O80858	Expressed protein OS=Arabidopsis thaliana GN=At2g30930 PE=1 SV=1	0.831	Down	At2g30930	67.1	16.936	136.29	28	7	7	11	9	8	7	6	7	7	6	7	581220000	482970000	582260000	1.059	0.88	1.061
Q940Z5	Phenolic glucoside malonyltransferase 1 OS=Arabidopsis thaliana GN=PMAT1 PE=1 SV=1	3.376	Up	PMAT1	11.1	51.764	25.598	3	4	4	0	3	0	2	4	1	2	4	1	10971000	37005000	0	0.457	1.543
F4JLD2	GTP binding protein beta 1 OS=Arabidopsis thaliana GN=AGB1 PE=4 SV=1	2.119	Up	AGB1	6.6	38.127	14.341	2	2	2	0	2	0	2	2	2	2	2	2	9851300	20873000	11137000	0.706	1.496	0.798
Q9XF88	Chlorophyll a-b binding protein CP29.2, chloroplastic OS=Arabidopsis thaliana GN=LHCB4.2 PE=1 SV=1	0.654	Down	LHCB4.2	59.2	31.193	323.31	119	17	12	42	37	40	17	16	16	12	12	12	28012000000	18326000000	24854000000	1.18	0.772	1.047
Q9LZG7	Glutathione S-transferase U27 OS=Arabidopsis thaliana GN=GSTU27 PE=2 SV=1	0.669	Down	GSTU27	23.8	26.761	40.096	10	6	6	4	4	2	5	6	6	5	6	6	254290000	170330000	202810000	1.216	0.814	0.97
Q8RXK6	DEAD-box ATP-dependent RNA helicase 8 OS=Arabidopsis thaliana GN=RH8 PE=2 SV=1	0.466	Down	RH8	18.6	57.686	12.545	4	8	2	1	1	2	7	7	7	2	2	2	37489000	17472000	41096000	1.171	0.546	1.283
Q9SA78	Coatomer subunit epsilon-1 OS=Arabidopsis thaliana GN=At1g30630 PE=2 SV=1	1.804	Up	At1g30630	25.3	32.602	59.521	13	6	6	2	7	4	6	6	6	6	6	6	142580000	257240000	169680000	0.751	1.355	0.894
Q07100	Serine/threonine-protein phosphatase PP2A-3 catalytic subunit OS=Arabidopsis thaliana GN=PP2A3 PE=1 SV=2	1.668	Up	PP2A3	25.2	35.832	71.212	12	7	5	2	6	4	5	6	7	3	4	5	75160000	125320000	94205000	0.765	1.276	0.959
Q9SAL0	E3 ubiquitin-protein ligase RGLG4 OS=Arabidopsis thaliana GN=RGLG4 PE=1 SV=1	1.358	Up	RGLG4	13.7	43.73	34.324	11	5	5	2	6	3	2	5	3	2	5	3	54160000	73523000	50638000	0.911	1.237	0.852
O65258	Beta-amylase 2, chloroplastic OS=Arabidopsis thaliana GN=BAM2 PE=1 SV=2	1.631	Up	BAM2	36.7	61.397	140.35	38	15	15	14	16	8	14	15	14	14	15	14	279700000	456100000	292350000	0.816	1.331	0.853
Q9LZF5	Lectin-like protein OS=Arabidopsis thaliana GN=LLP PE=1 SV=1	2.088	Up	LLP	47.4	30.162	206.06	37	9	8	12	15	10	9	9	9	8	8	8	902150000	1883000000	973020000	0.72	1.503	0.777
Q9ZQ80	Nodulin-related protein 1 OS=Arabidopsis thaliana GN=NRP1 PE=1 SV=1	0.753	Down	NRP1	62	19.7	152.59	35	9	8	12	13	10	9	9	9	8	8	8	1301000000	979430000	1086000000	1.159	0.873	0.968
Q9ZPS7	Transmembrane 9 superfamily member 3 OS=Arabidopsis thaliana GN=TMN3 PE=2 SV=1	1.438	Up	TMN3	10.1	68.048	46.826	14	5	1	2	5	7	4	4	5	1	0	1	95767000	137690000	110490000	0.835	1.201	0.964
O48844	26S proteasome non-ATPase regulatory subunit 1 homolog A OS=Arabidopsis thaliana GN=RPN2A PE=1 SV=1	1.253	Up	RPN2A	15.2	108.98	122.61	36	14	7	10	11	15	13	13	13	6	6	6	284670000	356750000	377950000	0.838	1.05	1.112
A0A1I9LT79	KH domain-containing protein / zinc finger (CCCH type) family protein OS=Arabidopsis thaliana GN=At3g12130 PE=4 SV=1	1.43	Up	At3g12130	17.6	18.149	14.259	4	2	2	2	2	0	2	2	1	2	2	1	30596000	43712000	0	0.823	1.177
Q9M7X9	Thioredoxin-like protein CITRX, chloroplastic OS=Arabidopsis thaliana GN=CITRX PE=1 SV=1	1.276	Up	CITRX	31.7	20.67	29.438	9	4	4	4	3	2	4	4	3	4	4	3	89126000	113740000	98633000	0.887	1.132	0.981
Q9LZG0	Adenosine kinase 2 OS=Arabidopsis thaliana GN=ADK2 PE=1 SV=1	0.799	Down	ADK2	43.5	37.846	57.15	14	14	4	6	4	4	14	13	14	4	4	4	158770000	126850000	128830000	1.149	0.918	0.933
Q8H124	Uncharacterized protein At2g34460, chloroplastic OS=Arabidopsis thaliana GN=At2g34460 PE=2 SV=1	0.693	Down	At2g34460	35	30.471	80.594	34	10	10	14	10	10	9	10	10	9	10	10	570620000	395440000	535350000	1.14	0.79	1.07
F4IUJ0	Uncharacterized protein OS=Arabidopsis thaliana GN=At2g26340 PE=4 SV=1	0.743	Down	At2g26340	18.6	27.824	89.629	12	4	4	3	5	4	4	4	4	4	4	4	201120000	149370000	151490000	1.202	0.893	0.905
F4HQT8	Uncharacterized protein OS=Arabidopsis thaliana GN=At1g13470 PE=4 SV=1	1.45	Up	At1g13470	16.1	44.094	24.275	5	3	3	1	2	2	3	3	2	3	3	2	32533000	47177000	28736000	0.9	1.305	0.795
Q9SZQ5	WD repeat-containing protein VIP3 OS=Arabidopsis thaliana GN=VIP3 PE=1 SV=1	1.742	Up	VIP3	13.1	34.259	23.617	5	3	3	2	2	1	3	2	2	3	2	2	29413000	51241000	33659000	0.772	1.345	0.883
Q9S7Y7	Alpha-xylosidase 1 OS=Arabidopsis thaliana GN=XYL1 PE=1 SV=1	0.547	Down	XYL1	31.6	102.4	268.04	70	24	23	26	16	28	23	23	24	22	22	23	1812100000	991710000	1872800000	1.162	0.636	1.201
Q9SE96	GEM-like protein 1 OS=Arabidopsis thaliana GN=FIP1 PE=1 SV=1	0.69	Down	FIP1	30.9	27.958	45.895	16	7	7	4	5	7	7	7	6	7	7	6	200330000	138390000	205180000	1.105	0.763	1.132
Q94JX5	LIM domain-containing protein WLIM1 OS=Arabidopsis thaliana GN=WLIM1 PE=1 SV=1	0.812	Down	WLIM1	17.9	21.04	29.358	9	4	4	1	4	4	4	4	3	4	4	3	73443000	59623000	55856000	1.166	0.947	0.887
P57751	UTP--glucose-1-phosphate uridylyltransferase 1 OS=Arabidopsis thaliana GN=UGP1 PE=2 SV=1	0.82	Down	UGP1	50.9	51.919	138.49	37	20	9	12	12	13	20	19	19	9	8	9	440930000	361670000	451340000	1.055	0.865	1.08
Q9M314	AT3g61540/F2A19_140 OS=Arabidopsis thaliana GN=F2A19.140 PE=1 SV=1	1.2	Up	F2A19.140	15.9	57.585	73.65	14	6	6	4	5	5	6	6	5	6	6	5	55720000	66869000	76051000	0.842	1.01	1.149
Q9LD43	Acetyl-coenzyme A carboxylase carboxyl transferase subunit alpha, chloroplastic OS=Arabidopsis thaliana GN=CAC3 PE=1 SV=1	1.308	Up	CAC3	17.9	85.305	103.26	21	9	9	6	9	6	9	9	8	9	9	8	111530000	145870000	135340000	0.852	1.114	1.034
Q93XY1	At5g53620 OS=Arabidopsis thaliana GN=MNC6.16 PE=1 SV=1	1.708	Up	MNC6.16	7.3	76.316	41.311	7	4	4	5	2	0	4	4	3	4	4	3	20049000	34263000	30444000	0.71	1.213	1.078
Q9FJ95	Sorbitol dehydrogenase OS=Arabidopsis thaliana GN=SDH PE=1 SV=1	2.371	Up	SDH	57.4	39.255	162.51	40	15	15	11	19	10	13	15	13	13	15	13	386460000	916920000	438290000	0.666	1.579	0.755
Q41906	Cysteine proteinase inhibitor 3 OS=Arabidopsis thaliana GN=CYS3 PE=2 SV=2	1.749	Up	CYS3	16.8	14.421	12.55	4	2	2	1	1	2	2	2	2	2	2	2	29701000	51945000	23058000	0.851	1.488	0.661
Q9SE50	Beta-D-glucopyranosyl abscisate beta-glucosidase OS=Arabidopsis thaliana GN=BGLU18 PE=1 SV=2	0.189	Down	BGLU18	57.2	60.459	323.31	128	22	21	45	23	60	20	19	22	19	18	21	8289300000	1568700000	10930000000	1.196	0.226	1.577
Q9FV81	Glutamyl-tRNA(Gln) amidotransferase subunit B, chloroplastic/mitochondrial OS=Arabidopsis thaliana GN=GATB PE=2 SV=1	0.829	Down	GATB	37.1	60.94	153.87	44	16	16	15	14	15	16	16	16	16	16	16	357880000	296720000	338330000	1.081	0.896	1.022
Q9FG36	Thioredoxin-like 3-1, chloroplastic OS=Arabidopsis thaliana GN=WCRKC1 PE=2 SV=3	0.611	Down	WCRKC1	21.4	24.516	41.239	14	6	6	5	4	5	6	6	6	6	6	6	206300000	126070000	157630000	1.263	0.772	0.965
Q9FMH8	Probable cysteine protease RD21B OS=Arabidopsis thaliana GN=RD21B PE=1 SV=1	3.454	Up	RD21B	7.8	51.203	34.793	8	3	3	1	4	3	2	3	2	2	3	2	25995000	89702000	34753000	0.518	1.789	0.693
A0A1P8B6C5	Proton pump interactor 1 OS=Arabidopsis thaliana GN=PPI1 PE=4 SV=1	1.903	Up	PPI1	17.8	60.067	64.979	14	8	8	3	9	2	7	8	6	7	8	6	87672000	166820000	60558000	0.835	1.589	0.577
Q9M0Z6	Peptide methionine sulfoxide reductase B3 OS=Arabidopsis thaliana GN=MSRB3 PE=2 SV=2	1.541	Up	MSRB3	16.5	18.847	14.159	5	3	2	2	2	1	3	3	2	2	2	1	12037000	18563000	0	0.787	1.213
Q41969	Eukaryotic translation initiation factor 2 subunit beta OS=Arabidopsis thaliana GN=EIF2B PE=1 SV=3	1.217	Up	EIF2B	25	30.663	69.181	19	6	6	5	7	7	5	6	5	5	6	5	154370000	187830000	183990000	0.88	1.071	1.049
A0A1P8AZL4	Uroporphyrinogen-III synthase family protein OS=Arabidopsis thaliana GN=HEMD PE=4 SV=1	0.681	Down	HEMD	24	26.824	43.386	13	5	5	4	5	4	5	4	5	5	4	5	148340000	101030000	140780000	1.141	0.777	1.083
Q8H1S4	1-aminocyclopropane-1-carboxylate oxidase homolog 3 OS=Arabidopsis thaliana GN=At1g06650 PE=2 SV=1	1.375	Up	At1g06650	25.2	42.02	74.533	17	10	10	5	7	5	8	9	10	8	9	10	125310000	172290000	126730000	0.886	1.218	0.896
Q9LN62	Arabinosyltransferase RRA3 OS=Arabidopsis thaliana GN=RRA3 PE=2 SV=1	1.243	Up	RRA3	12.1	48.251	34.277	7	4	4	2	3	2	4	4	3	4	4	3	28617000	35567000	24186000	0.971	1.207	0.821
Q9M5J9	Polygalacturonase inhibitor 1 OS=Arabidopsis thaliana GN=PGIP1 PE=1 SV=1	0.495	Down	PGIP1	12.7	36.689	22.711	8	4	4	4	2	2	4	3	4	4	3	4	74552000	36888000	73764000	1.208	0.598	1.195
Q9SXS7	Bifunctional L-3-cyanoalanine synthase/cysteine synthase D2 OS=Arabidopsis thaliana GN=CYSD2 PE=1 SV=1	0.759	Down	CYSD2	39.6	34.317	83.166	16	8	6	5	4	7	8	7	8	6	5	6	272770000	206910000	270230000	1.091	0.828	1.081
Q94K76	Curculin-like (Mannose-binding) lectin family protein OS=Arabidopsis thaliana GN=At5g18470 PE=2 SV=1	3.29	Up	At5g18470	21.3	45.807	67.394	11	6	6	2	8	1	2	6	4	2	6	4	84799000	278940000	70214000	0.586	1.928	0.485
Q38906	Translocase of chloroplast 34, chloroplastic OS=Arabidopsis thaliana GN=TOC34 PE=1 SV=2	0.748	Down	TOC34	17.9	34.707	31.701	6	5	5	3	1	2	5	3	4	5	3	4	88945000	66521000	83172000	1.118	0.836	1.046
Q56WN1	Glutamine synthetase cytosolic isozyme 1-1 OS=Arabidopsis thaliana GN=GLN1-1 PE=1 SV=2	2.983	Up	GLN1-1	55.1	39.115	234.73	32	17	4	11	14	7	16	17	15	3	4	3	966380000	2883000000	998150000	0.598	1.784	0.618
P29513	Tubulin beta-5 chain OS=Arabidopsis thaliana GN=TUBB5 PE=2 SV=1	1.293	Up	TUBB5	24.3	50.342	42.36	8	9	5	3	2	3	8	8	8	4	5	4	71079000	91856000	101870000	0.805	1.041	1.154
Q8LGI2	Probable mitochondrial saccharopine dehydrogenase-like oxidoreductase At5g39410 OS=Arabidopsis thaliana GN=At5g39410 PE=1 SV=2	0.627	Down	At5g39410	17.6	49.68	63.514	14	5	5	4	3	7	5	5	5	5	5	5	135150000	84652000	200170000	0.965	0.605	1.43
F4IAX0	Amine oxidase OS=Arabidopsis thaliana GN=At1g31690 PE=3 SV=1	0.223	Down	At1g31690	18.8	76.673	82.466	13	10	10	5	0	8	9	6	10	9	6	10	238640000	53195000	280310000	1.251	0.279	1.47
Q9SEL7	Protease Do-like 5, chloroplastic OS=Arabidopsis thaliana GN=DEGP5 PE=1 SV=3	1.295	Up	DEGP5	38.7	34.923	72.532	15	9	9	5	8	2	9	9	7	9	9	7	173860000	225140000	158550000	0.935	1.211	0.853
P52420	Phosphoribosylamine--glycine ligase, chloroplastic OS=Arabidopsis thaliana GN=PUR2 PE=2 SV=2	1.637	Up	PUR2	16.2	56.473	69.003	19	7	7	6	8	5	6	7	6	6	7	6	120190000	196810000	127480000	0.811	1.328	0.86
Q9SJI8	Multiprotein-bridging factor 1a OS=Arabidopsis thaliana GN=MBF1A PE=2 SV=1	1.512	Up	MBF1A	59.2	15.62	98.874	11	6	2	3	5	3	5	6	5	2	2	2	86555000	130820000	84775000	0.859	1.299	0.842
Q9LS02	Allene oxide cyclase 2, chloroplastic OS=Arabidopsis thaliana GN=AOC2 PE=1 SV=1	0.709	Down	AOC2	45.8	27.635	118.69	43	12	7	14	13	16	12	12	12	7	7	7	2113300000	1499900000	2658600000	1.011	0.717	1.272
Q94BZ0	At1g50450/F11F12_20 OS=Arabidopsis thaliana GN=At1g50450 PE=2 SV=1	0.614	Down	At1g50450	19.6	46.559	73.011	17	8	8	5	6	6	8	7	8	8	7	8	169170000	103830000	160420000	1.171	0.719	1.11
Q96253	ATP synthase subunit epsilon, mitochondrial OS=Arabidopsis thaliana GN=At1g51650 PE=1 SV=3	0.091	Down	At1g51650	41.4	7.8319	16.613	4	3	3	3	0	1	3	2	2	3	2	2	36886000	3351500	4500100	2.473	0.225	0.302
A0A1I9LRS8	Transducin/WD40 repeat-like superfamily protein OS=Arabidopsis thaliana GN=VCS PE=1 SV=1	1.232	Up	VCS	21.7	133.68	172.91	37	22	19	12	13	12	17	20	20	14	17	17	214420000	263950000	199280000	0.949	1.169	0.882
Q41951	Aquaporin TIP2-1 OS=Arabidopsis thaliana GN=TIP2-1 PE=1 SV=2	0.372	Down	TIP2-1	7.2	25.027	13.949	6	1	1	3	2	1	1	1	1	1	1	1	223380000	83115000	131590000	1.53	0.569	0.901
Q9SS87	Protein SIEVE ELEMENT OCCLUSION B OS=Arabidopsis thaliana GN=SEOB PE=1 SV=1	0.64	Down	SEOB	10.5	85.269	42.724	10	6	6	4	2	4	4	4	5	4	4	5	35513000	22746000	51893000	0.967	0.619	1.413
A0A1P8BA79	TBP-associated factor 5 OS=Arabidopsis thaliana GN=TAF5 PE=4 SV=1	1.609	Up	TAF5	5.9	74.111	22.985	6	3	3	2	2	2	3	2	3	3	2	3	37195000	59837000	52582000	0.746	1.2	1.054
Q9M5K2	Dihydrolipoyl dehydrogenase 2, mitochondrial OS=Arabidopsis thaliana GN=LPD2 PE=1 SV=1	1.25	Up	LPD2	49.7	53.985	230.69	40	21	13	15	14	11	20	19	19	12	11	11	480980000	601750000	448230000	0.943	1.179	0.878
P43286	Aquaporin PIP2-1 OS=Arabidopsis thaliana GN=PIP2-1 PE=1 SV=1	0.603	Down	PIP2-1	18.1	30.474	41.514	29	5	3	8	9	12	5	5	5	3	3	3	1834900000	1106500000	2682300000	0.979	0.59	1.431
Q42406	Peptidyl-prolyl cis-trans isomerase CYP18-4 OS=Arabidopsis thaliana GN=CYP18-4 PE=1 SV=1	1.25	Up	CYP18-4	45.9	18.378	109.41	27	8	4	9	10	8	8	8	8	4	4	4	756220000	945200000	773330000	0.917	1.146	0.937
Q8W4S4	V-type proton ATPase subunit a3 OS=Arabidopsis thaliana GN=VHA-a3 PE=1 SV=1	0.755	Down	VHA-a3	29.2	92.832	228.82	58	21	14	18	20	20	20	21	21	14	14	14	945630000	713880000	1044500000	1.049	0.792	1.159
B9DH97	AT2G33120 protein OS=Arabidopsis thaliana GN=SAR1 PE=2 SV=1	1.241	Up	SAR1	29.7	25.812	46.159	21	6	6	7	6	8	6	6	6	6	6	6	315640000	391830000	262900000	0.976	1.211	0.813
A0A1I9LQ49	Time for coffee OS=Arabidopsis thaliana GN=TIC PE=1 SV=1	1.514	Up	TIC	4.1	164.58	44.377	9	6	6	3	4	2	5	4	5	5	4	5	23415000	35437000	20505000	0.885	1.34	0.775
Q9S7D8	ATP sulfurylase 4, chloroplastic OS=Arabidopsis thaliana GN=APS4 PE=2 SV=1	1.228	Up	APS4	30.5	52.125	55.238	14	16	6	3	7	4	15	15	14	5	6	5	75632000	92932000	81947000	0.906	1.113	0.981
F4JM05	Photosystem II reaction center Psb28 protein OS=Arabidopsis thaliana GN=PSB28 PE=3 SV=1	0.412	Down	PSB28	20.7	21.943	32.331	6	3	3	3	1	2	3	3	3	3	3	3	92559000	38083000	52255000	1.518	0.625	0.857
P25819	Catalase-2 OS=Arabidopsis thaliana GN=CAT2 PE=1 SV=3	0.759	Down	CAT2	70.7	56.931	323.31	141	27	15	47	41	53	26	27	26	15	15	15	12851000000	9747700000	11458000000	1.132	0.859	1.009
Q9SIN5	Protein COLD-REGULATED 15B, chloroplastic OS=Arabidopsis thaliana GN=COR15B PE=1 SV=1	0.588	Down	COR15B	44.7	14.961	87.277	39	12	8	12	12	15	11	12	12	7	8	8	2210000000	1299000000	2453600000	1.112	0.654	1.234
Q9FMM3	GYF domain-containing protein OS=Arabidopsis thaliana GN=MBD2.15 PE=1 SV=1	1.26	Up	MBD2.15	6.3	187.62	65.336	12	7	7	3	5	4	7	5	4	7	5	4	43574000	54922000	49268000	0.885	1.115	1
Q94AF2	ATP-dependent (S)-NAD(P)H-hydrate dehydratase OS=Arabidopsis thaliana GN=At5g19150 PE=2 SV=1	0.614	Down	At5g19150	6.6	39.269	45.225	5	2	2	2	2	1	2	2	2	2	2	2	21284000	13074000	13642000	1.33	0.817	0.853
Q9SZH4	RNA-binding KH domain-containing protein PEPPER OS=Arabidopsis thaliana GN=PEP PE=1 SV=1	1.424	Up	PEP	10.7	54.024	41.114	4	4	4	0	3	1	3	4	2	3	4	2	14397000	20506000	13298000	0.896	1.276	0.828
Q9LMG7	Probable inactive purple acid phosphatase 2 OS=Arabidopsis thaliana GN=PAP2 PE=2 SV=1	0.716	Down	PAP2	14.2	73.716	62.643	26	8	8	9	9	8	8	8	8	8	8	8	277460000	198760000	258680000	1.133	0.811	1.056
F4IQD1	Glutathione S-transferase zeta 1 OS=Arabidopsis thaliana GN=GSTZ1 PE=4 SV=1	1.423	Up	GSTZ1	28.8	21.578	60.188	15	5	5	3	7	5	5	5	5	5	5	5	171560000	244300000	152500000	0.906	1.289	0.805
Q9SYP1	DExH-box ATP-dependent RNA helicase DExH12 OS=Arabidopsis thaliana GN=BRR2A PE=1 SV=1	4.188	Up	BRR2A	1.6	247.1	22.081	3	3	3	0	3	0	3	3	3	3	3	3	9259200	38790000	9369100	0.484	2.027	0.49
Q8L9J9	Probable carbohydrate esterase At4g34215 OS=Arabidopsis thaliana GN=At4g34215 PE=1 SV=2	1.394	Up	At4g34215	15	28.358	13.946	6	2	2	2	2	2	2	2	2	2	2	2	37151000	51751000	35028000	0.899	1.253	0.848
A0A1I9LQD4	Calcium-dependent protein kinase 32 OS=Arabidopsis thaliana GN=CPK32 PE=1 SV=1	1.637	Up	CPK32	7.5	48.085	26.459	8	4	2	4	3	1	4	4	4	2	2	2	39620000	64816000	49087000	0.774	1.267	0.959
Q9SRT9	UDP-arabinopyranose mutase 1 OS=Arabidopsis thaliana GN=RGP1 PE=1 SV=1	1.377	Up	RGP1	37.5	40.629	29.445	11	13	4	3	4	4	12	13	13	4	4	4	75070000	103390000	68410000	0.912	1.256	0.831
F4JRY9	Myosin heavy chain-like protein OS=Arabidopsis thaliana GN=At4g31340 PE=4 SV=1	0.694	Down	At4g31340	13.3	47.739	31.058	8	5	5	2	3	3	4	5	4	4	5	4	67184000	46646000	53503000	1.204	0.836	0.959
Q8RU07	EMBRYO DEFECTIVE 3147 OS=Arabidopsis thaliana GN=EMB3147 PE=2 SV=1	0.745	Down	EMB3147	41	41.522	99.537	30	12	12	12	8	10	11	11	9	11	11	9	407630000	303460000	396920000	1.104	0.822	1.075
Q9CAD1	At1g63660 OS=Arabidopsis thaliana GN=At1g63660 PE=2 SV=1	1.533	Up	At1g63660	20.4	59.314	70.674	16	10	10	2	8	6	8	9	9	8	9	9	73841000	113120000	75995000	0.842	1.291	0.867
Q9SJ68	At2g35820 OS=Arabidopsis thaliana GN=At2g35820 PE=2 SV=2	1.44	Up	At2g35820	32.8	21.279	49.723	6	4	4	1	3	2	4	4	3	4	4	3	95151000	137080000	69969000	0.945	1.361	0.695
O80731	Pectin acetylesterase 3 OS=Arabidopsis thaliana GN=PAE3 PE=2 SV=1	0.814	Down	PAE3	22.8	45.944	46.548	9	6	6	2	3	4	6	6	6	6	6	6	89905000	73109000	77503000	1.121	0.912	0.967
Q9C5M0	Mitochondrial dicarboxylate/tricarboxylate transporter DTC OS=Arabidopsis thaliana GN=DTC PE=1 SV=1	0.721	Down	DTC	46.6	31.912	138.74	36	11	11	13	11	12	10	10	11	10	10	11	828250000	597480000	936380000	1.052	0.759	1.189
Q9SAV0	Myrosinase-binding protein 1 OS=Arabidopsis thaliana GN=MBP1 PE=2 SV=1	0.113	Down	MBP1	35.9	50.166	183.96	51	15	15	22	4	25	15	8	15	15	8	15	1417600000	160900000	1718000000	1.29	0.146	1.563
Q9LVM3	Putative uncharacterized protein OS=Arabidopsis thaliana GN=EMB3143 PE=4 SV=1	1.572	Up	EMB3143	36.5	24.104	90.45	21	6	6	6	7	8	5	5	6	5	5	6	607990000	955710000	833230000	0.761	1.196	1.043
P0CJ47	Actin-3 OS=Arabidopsis thaliana GN=ACT3 PE=1 SV=1	2.947	Up	ACT3	44	41.797	71.566	10	14	2	3	4	3	13	14	14	2	2	2	54080000	159560000	92155000	0.531	1.565	0.904
P42731	Polyadenylate-binding protein 2 OS=Arabidopsis thaliana GN=PAB2 PE=1 SV=1	1.342	Up	PAB2	38.6	68.672	253.41	54	20	19	20	20	14	18	20	20	17	19	19	897870000	1205400000	819800000	0.922	1.237	0.841
O24653	Guanosine nucleotide diphosphate dissociation inhibitor 2 OS=Arabidopsis thaliana GN=GDI2 PE=2 SV=1	1.61	Up	GDI2	38.1	49.538	67.391	22	12	7	6	8	8	11	11	12	6	6	7	192820000	310310000	210880000	0.81	1.304	0.886
A0A1P8ATZ7	Thioredoxin superfamily protein OS=Arabidopsis thaliana GN=At1g21350 PE=4 SV=1	0.825	Down	At1g21350	23.8	29.502	37.675	12	4	4	4	4	4	4	4	4	4	4	4	217840000	179770000	176260000	1.139	0.94	0.921
Q9ZUL7	Defensin-like protein 1 OS=Arabidopsis thaliana GN=PDF2.3 PE=2 SV=1	0.483	Down	PDF2.3	31.2	8.544	44.416	13	2	2	5	3	5	2	2	2	2	2	2	65143000	31452000	45493000	1.375	0.664	0.961
Q84VQ4	NAD(P)H-quinone oxidoreductase subunit U, chloroplastic OS=Arabidopsis thaliana GN=ndhU PE=1 SV=1	0.682	Down	ndhU	55	24.437	147.35	22	8	8	6	8	8	7	7	8	7	7	8	580120000	396080000	580220000	1.118	0.763	1.118
Q93YR3	FAM10 family protein At4g22670 OS=Arabidopsis thaliana GN=At4g22670 PE=1 SV=1	2.657	Up	At4g22670	15.9	46.621	54.521	10	6	6	2	7	1	6	6	6	6	6	6	51125000	135880000	54702000	0.635	1.687	0.679
Q84WW2	Probable 6-phosphogluconolactonase 5, chloroplastic OS=Arabidopsis thaliana GN=EMB2024 PE=2 SV=1	1.482	Up	EMB2024	23.4	35.644	47.55	13	7	7	2	6	5	7	7	6	7	7	6	128780000	190940000	138040000	0.844	1.251	0.905
A0A1P8APZ5	Peptidylprolyl isomerase OS=Arabidopsis thaliana GN=At1g20810 PE=4 SV=1	0.754	Down	At1g20810	25.3	25.477	92.083	15	6	6	5	5	5	6	5	6	6	5	6	387510000	292240000	321920000	1.161	0.875	0.964
B9DH52	Lactoylglutathione lyase OS=Arabidopsis thaliana GN=At1g08110 PE=2 SV=1	0.699	Down	At1g08110	57	26.472	253.67	45	11	11	14	14	17	11	11	11	11	11	11	1260600000	881630000	1117100000	1.16	0.811	1.028
Q56WK6	Patellin-1 OS=Arabidopsis thaliana GN=PATL1 PE=1 SV=2	0.571	Down	PATL1	59.9	64.046	323.31	140	37	36	49	38	53	37	37	37	36	36	36	4847300000	2767500000	6026800000	1.066	0.609	1.325
P18616	DNA-directed RNA polymerase II subunit 1 OS=Arabidopsis thaliana GN=NRPB1 PE=1 SV=3	1.293	Up	NRPB1	1.9	204.62	10.435	2	2	2	2	0	0	2	2	2	2	2	2	129880000	167900000	133010000	0.904	1.169	0.926
Q680P8	40S ribosomal protein S29 OS=Arabidopsis thaliana GN=RPS29A PE=3 SV=2	1.222	Up	RPS29A	37.5	6.4294	19.493	10	2	2	4	3	3	2	2	2	2	2	2	106160000	129710000	78385000	1.013	1.238	0.748
O80713	Short-chain dehydrogenase reductase 3a OS=Arabidopsis thaliana GN=SDR3a PE=2 SV=1	2.123	Up	SDR3a	33.1	26.9	72.614	18	6	6	5	8	5	6	5	4	6	5	4	112300000	238520000	110970000	0.73	1.55	0.721
O04486	Ras-related protein RABA2a OS=Arabidopsis thaliana GN=RABA2A PE=2 SV=1	0.66	Down	RABA2A	41.5	24.108	47.261	9	8	5	5	2	2	7	7	8	4	4	5	158580000	104700000	178430000	1.077	0.711	1.212
Q94JV2	AT3g27050/MOJ10_14 OS=Arabidopsis thaliana GN=At3g27050 PE=1 SV=1	1.261	Up	At3g27050	14.8	20.611	37.903	7	2	2	3	3	1	2	2	2	2	2	2	45257000	57077000	50550000	0.888	1.12	0.992
Q9T070	Cytochrome c oxidase subunit 6a, mitochondrial OS=Arabidopsis thaliana GN=COX6A PE=3 SV=1	1.265	Up	COX6A	14.7	11.235	6.8622	4	1	1	0	2	2	1	1	1	1	1	1	52464000	66381000	40852000	0.986	1.247	0.767
F4IV18	Dihydroorotate dehydrogenase (DUF3598) OS=Arabidopsis thaliana GN=At2g44760 PE=4 SV=1	0.744	Down	At2g44760	5.2	55.876	30.314	5	2	2	2	2	1	2	2	2	2	2	2	29591000	22020000	28600000	1.107	0.824	1.07
Q9FX54	Glyceraldehyde-3-phosphate dehydrogenase GAPC2, cytosolic OS=Arabidopsis thaliana GN=GAPC2 PE=1 SV=1	0.784	Down	GAPC2	78.1	36.913	323.31	206	28	3	66	71	69	25	27	27	2	3	3	24229000000	18997000000	22118000000	1.112	0.872	1.015
Q9SZP8	Eukaryotic translation initiation factor 4B3 OS=Arabidopsis thaliana GN=EIF4B3 PE=1 SV=1	1.533	Up	EIF4B3	18.1	48.987	54.022	12	5	5	4	5	3	5	5	4	5	5	4	39434000	60488000	33364000	0.888	1.361	0.751
A0A1P8AV86	LisH and RanBPM domains containing protein OS=Arabidopsis thaliana GN=At1g06060 PE=4 SV=1	1.429	Up	At1g06060	11.4	24.575	34.015	3	2	2	1	2	0	2	2	2	2	2	2	16108000	22995000	16412000	0.87	1.243	0.887
Q42566	ATsEH OS=Arabidopsis thaliana GN=ATsEH PE=2 SV=1	1.652	Up	ATsEH	28	36.423	67.567	23	7	7	7	7	9	6	7	7	6	7	7	421550000	696720000	465160000	0.799	1.32	0.881
Q42601	Carbamoyl-phosphate synthase large chain, chloroplastic OS=Arabidopsis thaliana GN=CARB PE=1 SV=1	1.205	Up	CARB	26.2	129.96	198.21	55	28	28	15	15	25	24	24	27	24	24	27	416460000	501780000	569330000	0.84	1.012	1.148
Q9SKZ3	40S ribosomal protein S12-2 OS=Arabidopsis thaliana GN=RPS12C PE=1 SV=1	1.357	Up	RPS12C	52.8	15.329	59.973	22	8	5	8	6	8	8	8	7	5	5	4	539380000	731510000	549230000	0.889	1.206	0.905
Q9C8L2	Fatty-acid-binding protein 3, chloroplastic OS=Arabidopsis thaliana GN=FAP3 PE=1 SV=1	0.509	Down	FAP3	15.7	30.729	28.813	7	4	4	2	2	3	2	3	3	2	3	3	49853000	25365000	47495000	1.219	0.62	1.161
Q8VZB9	60S ribosomal protein L10a-1 OS=Arabidopsis thaliana GN=RPL10AA PE=1 SV=1	2.011	Up	RPL10AA	34.7	24.469	46.705	7	9	2	1	4	2	8	8	7	2	2	2	52452000	105440000	81598000	0.657	1.321	1.022
Q8GXR9	Alternative NAD(P)H-ubiquinone oxidoreductase C1, chloroplastic/mitochondrial OS=Arabidopsis thaliana GN=NDC1 PE=1 SV=2	0.763	Down	NDC1	12.3	56.915	44.827	13	5	5	4	4	5	4	4	5	4	4	5	88233000	67379000	75571000	1.145	0.874	0.981
Q9SSK5	MLP-like protein 43 OS=Arabidopsis thaliana GN=MLP43 PE=1 SV=1	0.491	Down	MLP43	77.2	17.889	122.63	46	15	13	20	13	13	15	15	15	13	13	13	1867600000	916080000	1862000000	1.206	0.592	1.202
Q9LVV6	At5g52960 OS=Arabidopsis thaliana GN=MNB8.2 PE=1 SV=1	1.539	Up	MNB8.2	24.1	19.163	40.247	7	4	4	2	3	2	4	4	4	4	4	4	44172000	68063000	48867000	0.823	1.267	0.91
O64767	AICARFT/IMPCHase bienzyme family protein OS=Arabidopsis thaliana GN=At2g35040 PE=3 SV=1	0.574	Down	At2g35040	37.6	59.471	137.57	47	15	15	17	13	17	15	15	15	15	15	15	873290000	501450000	717660000	1.252	0.719	1.029
Q94K48	ARM repeat superfamily protein OS=Arabidopsis thaliana GN=At3g62530 PE=2 SV=1	0.729	Down	At3g62530	44.3	24.503	121.29	25	10	10	8	8	9	10	10	10	10	10	10	355310000	259300000	304520000	1.16	0.846	0.994
Q944K2	Dolichyl-diphosphooligosaccharide--protein glycosyltransferase 48 kDa subunit OS=Arabidopsis thaliana GN=OST48 PE=2 SV=1	1.31	Up	OST48	34.8	48.744	128.29	35	13	13	14	9	12	13	13	13	13	13	13	314670000	412510000	381230000	0.852	1.116	1.032
Q39218	Serine acetyltransferase 3, mitochondrial OS=Arabidopsis thaliana GN=SAT3 PE=1 SV=3	0.705	Down	SAT3	6.4	42.72	17.327	6	3	3	3	2	1	3	3	2	3	3	2	18945000	13355000	17831000	1.134	0.799	1.067
P42744	NEDD8-activating enzyme E1 regulatory subunit AXR1 OS=Arabidopsis thaliana GN=AXR1 PE=1 SV=1	2.521	Up	AXR1	7.6	60.034	20.834	4	3	3	0	4	0	2	3	1	2	3	1	7849700	19778000	9201300	0.639	1.611	0.75
Q9FDZ9	60S ribosomal protein L21-2 OS=Arabidopsis thaliana GN=RPL21E PE=2 SV=1	0.686	Down	RPL21E	34.1	18.709	37.101	10	4	4	4	2	4	4	3	4	4	3	4	333200000	228550000	304140000	1.154	0.792	1.054
Q9ZVL6	UPF0603 protein At1g54780, chloroplastic OS=Arabidopsis thaliana GN=At1g54780 PE=1 SV=1	0.702	Down	At1g54780	44.2	31.138	125.84	53	11	11	18	18	17	11	11	10	11	11	10	6035400000	4238500000	5095100000	1.178	0.827	0.995
P42697	Dynamin-related protein 1A OS=Arabidopsis thaliana GN=DRP1A PE=1 SV=3	1.57	Up	DRP1A	28.4	68.171	122.63	29	17	17	7	11	11	16	16	15	16	16	15	192500000	302200000	258380000	0.767	1.204	1.029
A0A1P8B770	G2484-1 protein OS=Arabidopsis thaliana GN=G2484-1 PE=4 SV=1	1.51	Up	G2484-1	10.3	214.2	121.09	16	13	13	2	11	3	10	12	9	10	12	9	100990000	152370000	86120000	0.892	1.347	0.761
Q8LPJ4	ABC transporter E family member 2 OS=Arabidopsis thaliana GN=ABCE2 PE=2 SV=1	1.474	Up	ABCE2	11.2	68.389	62.334	15	5	5	3	6	6	5	5	5	5	5	5	42018000	61951000	59361000	0.772	1.138	1.09
Q944P7	Leucine aminopeptidase 2, chloroplastic OS=Arabidopsis thaliana GN=LAP2 PE=2 SV=2	0.774	Down	LAP2	45.8	61.306	160.97	32	20	8	10	9	13	19	18	20	8	6	8	1087100000	842070000	1088500000	1.081	0.837	1.082
A0A1P8B9K8	CwfJ-like family protein / zinc finger (CCCH-type) family protein OS=Arabidopsis thaliana GN=MHM17.1 PE=4 SV=1	3.681	Up	MHM17.1	7	56.229	20.434	4	3	3	1	3	0	2	3	2	2	3	2	6552800	24133000	8039500	0.508	1.87	0.623
Q9SMU8	Peroxidase 34 OS=Arabidopsis thaliana GN=PER34 PE=1 SV=1	1.764	Up	PER34	40.2	38.832	250.36	57	11	6	15	25	17	11	11	11	6	6	6	2677400000	4727600000	2716700000	0.794	1.401	0.805
F4JBU0	Phosphoglycerate mutase family protein OS=Arabidopsis thaliana GN=At3g60440 PE=4 SV=1	1.481	Up	At3g60440	10.3	32.336	13.832	6	2	2	1	2	3	2	2	2	2	2	2	51560000	76411000	59083000	0.827	1.225	0.948
Q8L733	Putative transferase At4g12130, mitochondrial OS=Arabidopsis thaliana GN=At4g12130 PE=1 SV=1	1.261	Up	At4g12130	9.9	43.527	19.655	6	3	3	2	2	2	3	3	3	3	3	3	24976000	31488000	26660000	0.901	1.136	0.962
A0A1P8B1L4	Annexin 4 OS=Arabidopsis thaliana GN=ANNAT4 PE=4 SV=1	0.733	Down	ANNAT4	18.5	34.494	39.019	8	5	5	4	1	3	5	4	5	5	4	5	63050000	46229000	91315000	0.943	0.691	1.366
Q9C9C9	Cytosolic sulfotransferase 18 OS=Arabidopsis thaliana GN=SOT18 PE=1 SV=1	0.576	Down	SOT18	61.1	40.464	199.62	36	17	13	14	9	13	16	13	15	12	9	11	408360000	235420000	367530000	1.211	0.698	1.09
Q8RXU5	60S ribosomal protein L37a-2 OS=Arabidopsis thaliana GN=RPL37AC PE=3 SV=1	0.643	Down	RPL37AC	35.9	10.241	39.081	21	4	4	6	7	8	2	4	4	2	4	4	161420000	103850000	122820000	1.248	0.803	0.949
O03982	Heavy metal-associated isoprenylated plant protein 39 OS=Arabidopsis thaliana GN=HIPP39 PE=2 SV=1	0.725	Down	HIPP39	34.5	19.781	28.207	5	4	4	3	0	2	4	4	4	4	4	4	51264000	37154000	41324000	1.185	0.859	0.956
Q9S841	Oxygen-evolving enhancer protein 1-2, chloroplastic OS=Arabidopsis thaliana GN=PSBO2 PE=1 SV=1	0.767	Down	PSBO2	58	35.019	323.31	309	21	8	107	96	106	21	21	21	8	8	8	93355000000	71614000000	76345000000	1.161	0.89	0.949
Q93W28	Uncharacterized protein At4g15545 OS=Arabidopsis thaliana GN=At4g15545 PE=1 SV=1	1.386	Up	At4g15545	70	37.206	301.2	40	17	17	8	19	13	13	17	14	13	17	14	777320000	1076400000	813490000	0.874	1.211	0.915
A0A1P8B665	Aminopeptidase P1 OS=Arabidopsis thaliana GN=APP1 PE=1 SV=1	1.601	Up	APP1	33.4	71.696	145.79	38	16	16	12	16	10	16	16	16	16	16	16	236850000	379310000	242210000	0.828	1.326	0.847
Q9FX95	ARP protein OS=Arabidopsis thaliana GN=NQR PE=2 SV=1	0.804	Down	NQR	21	67.943	87.299	20	10	10	8	6	6	9	10	9	9	10	9	163470000	131310000	131150000	1.151	0.925	0.924
A0A1P8B8R9	Heat shock protein 70 (Hsp 70) family protein OS=Arabidopsis thaliana GN=At4g16660 PE=3 SV=1	1.476	Up	At4g16660	18.7	99.643	82.385	16	13	13	5	7	4	7	12	12	7	12	12	135000000	199110000	106430000	0.919	1.356	0.725
Q93YQ3	Formyltetrahydrofolate deformylase 1, mitochondrial OS=Arabidopsis thaliana GN=PURU1 PE=1 SV=1	0.701	Down	PURU1	6.8	36.451	13.388	3	2	2	1	1	1	2	2	2	2	2	2	13249000	9280400	11384000	1.172	0.821	1.007
F4I7X1	SKU5-similar 6 OS=Arabidopsis thaliana GN=SKS6 PE=4 SV=1	0.53	Down	SKS6	14.8	60.577	33.443	8	7	4	3	1	4	5	5	7	2	2	4	109010000	57773000	97288000	1.238	0.656	1.105
O22263	Protein disulfide-isomerase like 2-1 OS=Arabidopsis thaliana GN=PDIL2-1 PE=2 SV=1	1.322	Up	PDIL2-1	56.8	39.496	199.88	54	19	18	17	19	18	18	18	18	17	17	17	1537800000	2033800000	1301600000	0.947	1.252	0.801
Q945K9	AT4g34150/F28A23_90 OS=Arabidopsis thaliana GN=At4g34150 PE=2 SV=1	4.423	Up	At4g34150	25.1	27.052	65.562	7	5	5	1	5	1	5	5	3	5	5	3	29371000	129840000	25030000	0.478	2.114	0.408
Q8LCT3	Thioredoxin-like 2-2, chloroplastic OS=Arabidopsis thaliana GN=At4g29670 PE=2 SV=2	1.21	Up	At4g29670	19.1	26.337	28.16	10	3	3	3	3	4	3	2	3	3	2	3	97627000	118100000	94872000	0.943	1.141	0.916
Q9XI42	F9L1.21 protein OS=Arabidopsis thaliana GN=At1g15270 PE=2 SV=1	2.071	Up	At1g15270	25	6.978	20.032	6	2	2	3	2	1	2	2	2	2	2	2	66706000	138170000	72101000	0.723	1.497	0.781
O49453	Uncharacterized protein At4g28440 OS=Arabidopsis thaliana GN=At4g28440 PE=1 SV=1	0.818	Down	At4g28440	39.2	16.459	75.744	19	4	4	5	8	6	4	4	4	4	4	4	203640000	166610000	204240000	1.063	0.87	1.067
Q8RXF1	Probable splicing factor 3A subunit 1 OS=Arabidopsis thaliana GN=At1g14650 PE=1 SV=2	2.665	Up	At1g14650	8.4	87.593	37.959	5	5	4	1	3	1	4	4	4	3	3	3	19204000	51203000	20634000	0.633	1.687	0.68
P42770	Glutathione reductase, chloroplastic OS=Arabidopsis thaliana GN=EMB2360 PE=2 SV=1	0.664	Down	EMB2360	47.3	60.852	323.31	69	20	20	25	22	22	18	19	18	18	19	18	1696800000	1126500000	1702600000	1.125	0.747	1.129
Q944H0	Phosphomethylethanolamine N-methyltransferase OS=Arabidopsis thaliana GN=NMT2 PE=2 SV=2	0.573	Down	NMT2	49.7	56.045	247.87	64	20	11	24	16	24	20	19	20	11	10	11	1679900000	963290000	1500200000	1.216	0.697	1.086
Q8GXR5	Phosphopantothenate--cysteine ligase 1 OS=Arabidopsis thaliana GN=PPCS1 PE=2 SV=1	1.255	Up	PPCS1	13.6	35.368	24.593	7	3	3	2	3	2	3	3	3	3	3	3	11631000	14602000	11652000	0.921	1.156	0.923
Q9XI87	At1g14000 OS=Arabidopsis thaliana GN=VH1-interacting kinase PE=2 SV=1	1.489	Up	VH1-interacting	30.1	49.335	81.972	32	12	12	10	11	11	10	12	12	10	12	12	208050000	309600000	235280000	0.829	1.234	0.937
Q9FE68	UDP-glycosyltransferase 71C5 OS=Arabidopsis thaliana GN=UGT71C5 PE=2 SV=1	1.652	Up	UGT71C5	6	52.646	15.093	4	2	2	2	1	1	2	2	2	2	2	2	24886000	41112000	26910000	0.804	1.328	0.869
Q94JV1	Appr-1-p processing enzyme family protein OS=Arabidopsis thaliana GN=At1g69340 PE=2 SV=1	1.319	Up	At1g69340	12.1	63.304	55.528	10	5	5	3	3	4	3	5	5	3	5	5	37473000	49434000	44984000	0.852	1.124	1.023
Q9CAK8	2-C-methyl-D-erythritol 2,4-cyclodiphosphate synthase, chloroplastic OS=Arabidopsis thaliana GN=ISPF PE=1 SV=1	1.474	Up	ISPF	26.4	24.811	32.9	9	4	4	5	2	2	4	4	4	4	4	4	194560000	286920000	198220000	0.859	1.266	0.875
Q9FFP6	Pyruvate kinase OS=Arabidopsis thaliana GN=MBK5.16 PE=3 SV=1	1.336	Up	MBK5.16	23.1	55.017	38.397	15	10	3	4	8	3	10	10	10	3	3	3	87871000	117450000	90018000	0.893	1.193	0.914
P25702	Acyl carrier protein 3, chloroplastic OS=Arabidopsis thaliana GN=ACP3 PE=1 SV=2	0.625	Down	ACP3	27.9	14.65	68.597	10	3	2	2	4	4	3	3	3	2	2	2	877010000	548050000	466440000	1.391	0.869	0.74
Q93V66	Protein FATTY ACID EXPORT 1, chloroplastic OS=Arabidopsis thaliana GN=FAX1 PE=1 SV=1	1.239	Up	FAX1	25.7	24.347	32.369	9	3	3	3	3	3	3	2	3	3	2	3	26788000	33213000	46766000	0.753	0.933	1.314
Q9SGT7	At1g56110/T6H22_9 OS=Arabidopsis thaliana GN=NOP56 PE=2 SV=1	1.275	Up	NOP56	7.3	58.673	29.076	5	3	3	1	1	3	2	3	2	2	3	2	23273000	29683000	30653000	0.835	1.065	1.1
F4HUG9	Ribonuclease T2 family protein OS=Arabidopsis thaliana GN=At1g14210 PE=3 SV=1	1.243	Up	At1g14210	10.9	28.186	23.34	6	2	2	3	2	1	2	2	2	2	2	2	37182000	46225000	37446000	0.923	1.147	0.93
Q9LRS0	Peroxisomal (S)-2-hydroxy-acid oxidase GLO2 OS=Arabidopsis thaliana GN=GLO2 PE=1 SV=1	0.707	Down	GLO2	83.9	40.306	323.31	171	28	10	58	54	59	28	28	28	10	10	10	13849000000	9779000000	13520000000	1.118	0.79	1.092
Q9LZX6	4-hydroxy-tetrahydrodipicolinate synthase 1, chloroplastic OS=Arabidopsis thaliana GN=DHDPS1 PE=2 SV=2	1.237	Up	DHDPS1	27.1	40.62	123.69	15	8	4	1	9	5	6	8	7	3	4	4	113410000	140230000	150840000	0.841	1.04	1.119
A0A1P8AU99	Rhodanese homologue 2 OS=Arabidopsis thaliana GN=RDH2 PE=4 SV=1	0.804	Down	RDH2	37.2	29.451	66.808	17	7	7	7	3	7	6	5	7	6	5	7	180870000	145510000	163530000	1.108	0.891	1.001
Q9FZ27	Germin-like protein subfamily 2 member 2 OS=Arabidopsis thaliana GN=At1g02335 PE=2 SV=1	1.233	Up	At1g02335	19.6	23.441	27.446	18	4	3	5	7	6	4	4	4	3	3	3	313960000	387080000	260380000	0.98	1.208	0.812
Q8RV79	Cytosolic sulfotransferase 11 OS=Arabidopsis thaliana GN=SOT11 PE=2 SV=1	1.55	Up	SOT11	19.9	40.837	43.789	8	6	6	2	4	2	6	5	4	6	5	4	28861000	44728000	33011000	0.812	1.259	0.929
A0A1P8AY87	Protein phosphatase 5.2 OS=Arabidopsis thaliana GN=PP5.2 PE=4 SV=1	1.2	Up	PP5.2	16.2	60.226	77.431	18	9	9	4	9	5	7	9	6	7	9	6	117170000	140680000	118810000	0.933	1.12	0.946
P27140	Beta carbonic anhydrase 1, chloroplastic OS=Arabidopsis thaliana GN=BCA1 PE=1 SV=2	0.607	Down	BCA1	62	37.449	22.207	9	21	3	4	4	1	21	20	20	3	3	3	204900000	124200000	105920000	1.413	0.857	0.73
P94078	Alpha-mannosidase At3g26720 OS=Arabidopsis thaliana GN=At3g26720 PE=1 SV=1	1.279	Up	At3g26720	15.1	115.22	84.605	22	13	13	4	9	9	12	12	12	12	12	12	283660000	362970000	304380000	0.895	1.145	0.96
Q93VQ6	At1g07080/F10K1_15 OS=Arabidopsis thaliana GN=At1g07080 PE=2 SV=1	1.52	Up	At1g07080	18.9	29.698	74.883	14	5	5	4	8	2	5	5	4	5	5	4	177100000	269020000	149240000	0.892	1.356	0.752
Q9ZUU2	Thioredoxin-like protein AAED1, chloroplastic OS=Arabidopsis thaliana GN=At2g37240 PE=1 SV=2	0.823	Down	At2g37240	23.8	26.604	31.685	7	5	5	2	3	2	5	5	4	5	5	4	95940000	78967000	63698000	1.206	0.993	0.801
Q8RXD7	Alpha-taxilin-like protein OS=Arabidopsis thaliana GN=At5g50840 PE=2 SV=1	2.049	Up	At5g50840	8.7	46.795	19.919	3	3	3	1	2	0	3	3	1	3	3	1	5575300	11435000	0	0.656	1.344
Q9SHE8	Photosystem I reaction center subunit III, chloroplastic OS=Arabidopsis thaliana GN=PSAF PE=1 SV=1	0.693	Down	PSAF	42.1	24.173	124.15	56	8	8	17	16	23	8	8	8	8	8	8	25760000000	17857000000	27209000000	1.091	0.756	1.153
Q9LK22	Plant UBX domain-containing protein 1 OS=Arabidopsis thaliana GN=PUX1 PE=1 SV=1	1.211	Up	PUX1	17.1	28.502	28.437	7	2	2	2	3	2	2	2	2	2	2	2	47609000	57599000	41537000	0.973	1.178	0.849
A8MS46	Embryo defective 1303 OS=Arabidopsis thaliana GN=EMB1303 PE=4 SV=1	0.758	Down	EMB1303	8.6	15.702	6.2309	4	1	1	1	2	1	1	1	1	1	1	1	57918000	43906000	60747000	1.069	0.81	1.121
Q9SCZ8	AT3g51510/F26O13_150 OS=Arabidopsis thaliana GN=F26O13.150 PE=2 SV=1	1.36	Up	F26O13.150	19.9	19.846	52.118	11	3	3	6	3	2	3	3	3	3	3	3	85641000	116500000	76243000	0.923	1.255	0.822
F4JB05	Ribosomal protein S5/Elongation factor G/III/V family protein OS=Arabidopsis thaliana GN=MGH6.2 PE=4 SV=1	1.495	Up	MGH6.2	23.5	90.994	12.623	8	20	1	3	3	2	19	18	19	1	1	1	125360000	187480000	234670000	0.687	1.027	1.286
F4JXD5	Actin depolymerizing factor 3 OS=Arabidopsis thaliana GN=ADF3 PE=3 SV=1	1.732	Up	ADF3	50.8	14.124	143.33	26	4	3	6	11	9	3	4	4	2	3	3	1122200000	1942000000	985150000	0.831	1.439	0.73
P17597	Acetolactate synthase, chloroplastic OS=Arabidopsis thaliana GN=ALS PE=1 SV=1	1.25	Up	ALS	12.5	72.584	50.917	10	7	7	3	5	2	7	5	6	7	5	6	56118000	70142000	61539000	0.896	1.12	0.983
Q8GS60	7-hydroxymethyl chlorophyll a reductase, chloroplastic OS=Arabidopsis thaliana GN=HCAR PE=1 SV=1	0.69	Down	HCAR	9.5	51.661	40.395	8	4	4	3	2	3	3	3	4	3	3	4	72983000	50405000	68876000	1.139	0.786	1.075
Q9C865	SH3 domain-containing protein 1 OS=Arabidopsis thaliana GN=SH3P1 PE=1 SV=1	1.7	Up	SH3P1	28.9	49.258	121.91	19	11	10	3	11	5	9	11	7	8	10	6	108720000	185010000	103740000	0.821	1.396	0.783
P54609	Cell division control protein 48 homolog A OS=Arabidopsis thaliana GN=CDC48A PE=1 SV=1	1.594	Up	CDC48A	64.2	89.392	323.31	94	41	41	26	38	30	35	36	37	35	36	37	892500000	1422100000	1120500000	0.779	1.242	0.979
Q8VXY9	Ureidoglycolate hydrolase OS=Arabidopsis thaliana GN=UAH PE=1 SV=1	0.759	Down	UAH	25.2	51.486	57.239	13	9	9	3	7	3	8	9	8	8	9	8	200320000	151950000	184880000	1.119	0.849	1.033
Q9LPR4	2-isopropylmalate synthase 1, chloroplastic OS=Arabidopsis thaliana GN=IPMS1 PE=1 SV=2	0.824	Down	IPMS1	24.4	68.675	93.116	24	11	3	7	9	8	11	11	10	3	3	3	221490000	182440000	222950000	1.06	0.873	1.067
B9DGD6	Acetyl-coenzyme A synthetase, chloroplastic/glyoxysomal OS=Arabidopsis thaliana GN=ACS PE=1 SV=1	1.384	Up	ACS	34.1	81.888	159.86	48	19	19	14	19	15	16	18	16	16	18	16	432210000	597950000	437580000	0.883	1.222	0.894
Q9SJC4	Nudix hydrolase 6 OS=Arabidopsis thaliana GN=NUDT6 PE=1 SV=1	3.822	Up	NUDT6	36.4	31.913	70.08	12	10	10	1	10	1	7	10	3	7	10	3	29281000	111830000	21746000	0.539	2.06	0.401
P30187	Calmodulin-like protein 10 OS=Arabidopsis thaliana GN=CML10 PE=2 SV=1	1.938	Up	CML10	18.8	21.727	39.432	11	4	4	3	4	4	4	4	4	4	4	4	79071000	153100000	52097000	0.834	1.616	0.55
Q9FE58	60S ribosomal protein L22-3 OS=Arabidopsis thaliana GN=RPL22C PE=2 SV=1	1.501	Up	RPL22C	38.7	14.047	31.964	8	4	4	4	2	2	4	4	4	4	4	4	71861000	107870000	132440000	0.691	1.037	1.273
Q9LZQ0	Cytochrome c oxidase subunit 5C-2 OS=Arabidopsis thaliana GN=At3g62400 PE=3 SV=1	0.628	Down	At3g62400	35.9	7.0521	17.778	6	3	2	3	1	2	2	3	3	1	2	2	149540000	93807000	322070000	0.793	0.498	1.709
F4IB63	Leucine-rich repeat protein kinase family protein OS=Arabidopsis thaliana GN=At1g51805 PE=4 SV=1	0.72	Down	At1g51805	6.3	98.075	34.644	7	5	3	1	3	3	3	5	3	2	3	1	29671000	21362000	22718000	1.207	0.869	0.924
A0A1P8B021	Pyridoxal phosphate (PLP)-dependent transferases superfamily protein OS=Arabidopsis thaliana GN=AAS PE=3 SV=1	2.07	Up	AAS	11.9	51.223	42.933	5	3	3	2	2	1	2	3	3	2	3	3	27426000	56781000	29131000	0.726	1.503	0.771
A0A1P8B1E5	3-phosphoshikimate 1-carboxyvinyltransferase OS=Arabidopsis thaliana GN=At2g45300 PE=3 SV=1	1.288	Up	At2g45300	14.3	55.384	56.495	19	6	3	5	7	7	5	6	6	2	3	3	155060000	199860000	166270000	0.893	1.15	0.957
Q9SLF7	60S acidic ribosomal protein P2-2 OS=Arabidopsis thaliana GN=RPP2B PE=1 SV=1	2.086	Up	RPP2B	75.7	11.444	83.003	22	6	1	7	8	7	6	5	5	1	1	1	361820000	754640000	446920000	0.694	1.448	0.858
O81148	Proteasome subunit alpha type-4-A OS=Arabidopsis thaliana GN=PAC1 PE=1 SV=1	1.333	Up	PAC1	56.4	27.475	176.04	42	13	13	12	16	14	13	13	13	13	13	13	737730000	983360000	876840000	0.852	1.136	1.013
F4K4D5	Eukaryotic translation initiation factor 3 subunit B OS=Arabidopsis thaliana GN=TIF3B1 PE=1 SV=1	1.931	Up	TIF3B1	12.7	84.913	69.327	16	9	2	4	6	6	5	7	7	1	2	1	35099000	67805000	51290000	0.683	1.319	0.998
Q9C505	Eukaryotic translation initiation factor 5A-3 OS=Arabidopsis thaliana GN=ELF5A-3 PE=2 SV=1	1.669	Up	ELF5A-3	32.3	17.207	71.723	6	6	1	2	2	2	5	5	5	1	1	1	117290000	195810000	94718000	0.863	1.44	0.697
Q8VYJ4	AT3g25150/MJL12_9 OS=Arabidopsis thaliana GN=At3g25150 PE=2 SV=1	0.413	Down	At3g25150	9.2	52.874	24.942	5	3	3	2	1	2	2	1	2	2	1	2	24737000	10238000	0	1.415	0.585
O48963	Phototropin-1 OS=Arabidopsis thaliana GN=PHOT1 PE=1 SV=1	1.667	Up	PHOT1	20.2	111.69	75.524	13	14	11	3	6	4	13	13	12	10	10	10	82608000	137690000	122540000	0.723	1.205	1.072
P0DI79	UPF0496 protein At3g28300 OS=Arabidopsis thaliana GN=At3g28300 PE=2 SV=1	0.597	Down	At3g28300	41	42.954	89.526	21	12	12	7	4	10	9	8	11	9	8	11	191210000	114280000	280110000	0.98	0.585	1.435
P56777	Photosystem II CP47 reaction center protein OS=Arabidopsis thaliana GN=psbB PE=1 SV=1	0.67	Down	psbB	31.5	56.036	323.31	301	17	17	95	92	114	17	16	17	17	16	17	55184000000	36986000000	47090000000	1.189	0.797	1.014
F4JRE7	MutT/nudix family protein OS=Arabidopsis thaliana GN=NUDT7 PE=4 SV=1	2.428	Up	NUDT7	35.4	36.51	174.86	25	10	10	5	12	8	7	9	7	7	9	7	245380000	595380000	204320000	0.704	1.709	0.587
O82314	Probable transcriptional regulatory protein At2g25830 OS=Arabidopsis thaliana GN=At2g25830 PE=2 SV=2	2.772	Up	At2g25830	7.6	36.813	17.459	6	2	2	2	2	2	2	2	2	2	2	2	16159000	44797000	23503000	0.574	1.591	0.835
Q9LPC5	Brefeldin A-inhibited guanine nucleotide-exchange protein 3 OS=Arabidopsis thaliana GN=BIG3 PE=1 SV=1	2.161	Up	BIG3	1.3	194.94	13.92	4	2	2	0	2	2	2	2	2	2	2	2	8214700	17744000	11138000	0.664	1.435	0.901
O48773	Protein disulfide-isomerase 2-3 OS=Arabidopsis thaliana GN=PDIL2-3 PE=2 SV=1	1.723	Up	PDIL2-3	14.3	47.754	38.891	10	5	5	2	5	3	5	5	5	5	5	5	104520000	180150000	126840000	0.762	1.313	0.925
Q5XF33	Magnesium-chelatase subunit ChlI-2, chloroplastic OS=Arabidopsis thaliana GN=CHLI2 PE=1 SV=1	1.538	Up	CHLI2	36.6	46.097	40.084	11	14	6	3	5	3	13	14	13	5	6	5	82528000	126810000	106690000	0.783	1.204	1.013
O04373	IAA-amino acid hydrolase ILR1-like 4 OS=Arabidopsis thaliana GN=ILL4 PE=1 SV=2	2.079	Up	ILL4	12	48.263	67.766	12	5	5	2	6	4	5	5	5	5	5	5	42715000	88709000	44975000	0.726	1.509	0.765
P56794	50S ribosomal protein L20, chloroplastic OS=Arabidopsis thaliana GN=rpl20 PE=3 SV=1	7.889	Up	rpl20	16.2	14.163	12.962	3	2	2	0	2	1	2	2	1	2	2	1	3900500	30824000	0	0.225	1.775
Q9SIF2	Heat shock protein 90-5, chloroplastic OS=Arabidopsis thaliana GN=HSP90-5 PE=1 SV=1	1.397	Up	HSP90-5	42.6	88.662	310.08	68	26	22	15	27	26	22	25	23	19	21	20	772930000	1080200000	971340000	0.821	1.147	1.032
Q8L5Z7	Sorting nexin 2A OS=Arabidopsis thaliana GN=SNX2A PE=1 SV=1	1.576	Up	SNX2A	9.2	65.527	34.896	9	5	5	2	4	3	4	5	5	4	5	5	24306000	38294000	42591000	0.693	1.092	1.215
Q9M6N7	Ammonium transporter 2 OS=Arabidopsis thaliana GN=AMT2 PE=1 SV=2	2.395	Up	AMT2	5.3	50.768	12.505	4	2	2	0	3	1	1	2	1	1	2	1	19390000	46413000	20454000	0.674	1.614	0.711
Q9XFH9	Thioredoxin F2, chloroplastic OS=Arabidopsis thaliana GN=At5g16400 PE=2 SV=1	1.547	Up	At5g16400	17.3	19.999	30.986	13	3	3	4	5	4	3	3	3	3	3	3	362470000	560820000	290480000	0.896	1.386	0.718
O80837	Remorin OS=Arabidopsis thaliana GN=DBP PE=1 SV=1	0.645	Down	DBP	61.1	20.968	197.05	60	17	16	19	18	23	17	16	17	16	15	16	1735200000	1118700000	1875700000	1.101	0.71	1.19
O04153	Calreticulin-3 OS=Arabidopsis thaliana GN=CRT3 PE=1 SV=2	2.866	Up	CRT3	64.2	49.843	323.31	62	26	26	17	32	13	23	25	22	23	25	22	1255900000	3601200000	970710000	0.647	1.854	0.5
O48529	Rhodanese-like domain-containing protein 9, chloroplastic OS=Arabidopsis thaliana GN=STR9 PE=2 SV=1	0.795	Down	STR9	48.7	25.51	59.511	22	8	8	6	9	7	6	7	8	6	7	8	1184100000	940430000	1006900000	1.134	0.901	0.965
Q9STT2	Vacuolar protein sorting-associated protein 29 OS=Arabidopsis thaliana GN=VPS29 PE=2 SV=1	1.22	Up	VPS29	33.2	20.968	37.202	11	5	5	4	4	3	4	4	5	4	4	5	73675000	89898000	109580000	0.809	0.987	1.204
F4JQ55	Chaperone protein htpG family protein OS=Arabidopsis thaliana GN=SHD PE=1 SV=1	2.284	Up	SHD	27	94.148	151.07	41	20	18	9	21	11	17	20	15	16	18	14	305280000	697100000	296840000	0.705	1.61	0.685
Q9SA55	F10O3.3 protein OS=Arabidopsis thaliana GN=At1g03140 PE=2 SV=1	1.827	Up	At1g03140	5.7	47.881	12.788	4	2	2	2	2	0	2	2	2	2	2	2	6167100	11275000	7438600	0.744	1.359	0.897
Q8GWB3	Protein YIPF OS=Arabidopsis thaliana GN=At3g05280 PE=1 SV=1	0.445	Down	At3g05280	9.3	30.746	11.635	2	2	2	2	0	0	2	2	1	2	2	1	25441000	11331000	0	1.384	0.616
F4KHD5	A-kinase anchor-like protein OS=Arabidopsis thaliana GN=MPO12.160 PE=1 SV=1	1.942	Up	MPO12.160	30.4	323	323.31	120	58	58	23	65	32	50	58	51	50	58	51	511310000	993370000	674840000	0.704	1.367	0.929
Q9LM92	Small nuclear ribonucleoprotein SmD3b OS=Arabidopsis thaliana GN=SMD3B PE=2 SV=1	1.296	Up	SMD3B	29	14.237	16.992	5	3	2	0	3	2	3	3	2	2	2	1	35328000	45773000	31398000	0.942	1.221	0.837
Q8H0X6	Cysteine proteinase inhibitor 6 OS=Arabidopsis thaliana GN=CYS6 PE=1 SV=2	1.778	Up	CYS6	48.3	26.294	95.346	14	9	9	2	8	4	8	9	9	8	9	9	252050000	448050000	271920000	0.778	1.383	0.839
Q9SEU6	Thioredoxin M4, chloroplastic OS=Arabidopsis thaliana GN=At3g15360 PE=2 SV=2	0.828	Down	At3g15360	28	21.172	110.81	41	5	5	14	15	12	5	5	5	5	5	5	4274300000	3536600000	3625900000	1.121	0.928	0.951
Q9LVZ8	Protein LURP-one-related 12 OS=Arabidopsis thaliana GN=At3g15810 PE=2 SV=1	2.276	Up	At3g15810	36.4	24.817	49.239	11	7	7	1	8	2	5	7	3	5	7	3	46380000	105590000	46223000	0.702	1.598	0.7
Q84TE7	At5g22340 OS=Arabidopsis thaliana GN=MWD9.13 PE=2 SV=1	0.784	Down	MWD9.13	10.8	36.265	19.403	5	3	3	2	2	1	3	3	3	3	3	3	16134000	12643000	17668000	1.042	0.817	1.141
Q8LC12	At4g01897 OS=Arabidopsis thaliana GN=At4g01897 PE=1 SV=1	1.827	Up	At4g01897	44.3	14.158	27.42	5	4	4	1	3	1	4	4	3	4	4	3	43244000	78983000	44045000	0.78	1.425	0.795
Q94AU9	Chaperonin-like RBCX protein 1, chloroplastic OS=Arabidopsis thaliana GN=RBCX1 PE=1 SV=1	0.722	Down	RBCX1	45.4	20.199	40.56	6	5	5	2	2	2	5	3	4	5	3	4	51335000	37055000	43950000	1.164	0.84	0.996
F4K4C5	Kinesin-like protein KIN-14S OS=Arabidopsis thaliana GN=KIN14S PE=3 SV=1	1.459	Up	KIN14S	2.5	85.437	10.658	3	2	2	1	1	1	2	2	2	2	2	2	49437000	72095000	46766000	0.881	1.285	0.834
Q9LQ96	Polyphosphoinositide binding protein, putative OS=Arabidopsis thaliana GN=At1g01630 PE=2 SV=1	1.519	Up	At1g01630	7.5	29.216	11.675	2	2	2	0	2	0	2	2	2	2	2	2	6424200	9751700	6541600	0.848	1.288	0.864
F4HTA1	Exocyst complex component sec3A OS=Arabidopsis thaliana GN=SEC3A PE=4 SV=1	2.317	Up	SEC3A	5.5	100.16	29.73	4	5	5	0	4	0	3	5	3	3	5	3	13618000	31536000	12600000	0.707	1.638	0.655
Q9ZV06	Probable acetyltransferase NATA1-like OS=Arabidopsis thaliana GN=At2g39020 PE=2 SV=1	0.699	Down	At2g39020	11	26.44	14.628	3	2	2	0	1	2	2	2	2	2	2	2	18701000	13061000	15290000	1.192	0.833	0.975
Q9M337	40S ribosomal protein S21-1 OS=Arabidopsis thaliana GN=RPS21B PE=1 SV=1	1.326	Up	RPS21B	18.3	9.0741	61.951	10	1	1	3	3	4	1	1	1	1	1	1	33366000	44233000	28741000	0.941	1.248	0.811
P55229	Glucose-1-phosphate adenylyltransferase large subunit 1, chloroplastic OS=Arabidopsis thaliana GN=ADG2 PE=1 SV=3	0.749	Down	ADG2	58	57.673	323.31	141	29	28	51	40	50	29	29	29	28	28	28	4854600000	3632100000	4535500000	1.118	0.837	1.045
F4HS76	Actin-like ATPase superfamily protein OS=Arabidopsis thaliana GN=NHO1 PE=4 SV=1	1.459	Up	NHO1	13.1	52.483	41.384	8	6	6	2	5	1	4	6	4	4	6	4	47140000	68780000	42751000	0.891	1.3	0.808
Q8S8Q6	Tetraspanin-8 OS=Arabidopsis thaliana GN=TET8 PE=2 SV=1	2.301	Up	TET8	24.2	30.658	63.679	6	5	5	0	5	1	3	5	4	3	5	4	52076000	119750000	49022000	0.707	1.627	0.666
Q8VZQ4	Probable serine/threonine protein phosphatase 2A regulatory subunit B''gamma OS=Arabidopsis thaliana GN=B''GAMMA PE=2 SV=1	0.676	Down	B''GAMMA	5	62.018	17.099	3	3	3	0	3	0	2	3	1	2	3	1	28302000	19144000	0	1.193	0.807
Q8GYC7	PGR5-like protein 1B, chloroplastic OS=Arabidopsis thaliana GN=PGRL1B PE=1 SV=1	0.592	Down	PGRL1B	24	34.909	57.395	9	6	6	3	2	4	5	5	6	5	5	6	154170000	91241000	96058000	1.354	0.802	0.844
Q9LKR3	Mediator of RNA polymerase II transcription subunit 37a OS=Arabidopsis thaliana GN=MED37A PE=1 SV=1	2.784	Up	MED37A	47.1	73.628	92.626	4	27	2	1	2	1	26	26	24	2	2	2	76979000	214390000	104190000	0.584	1.626	0.79
F4JDC2	Evolutionarily conserved C-terminal region 2 OS=Arabidopsis thaliana GN=ECT2 PE=1 SV=1	1.271	Up	ECT2	12.2	72.196	49.407	13	6	5	5	4	4	6	6	6	5	5	5	66154000	84097000	68489000	0.907	1.153	0.939
P31169	Stress-induced protein KIN2 OS=Arabidopsis thaliana GN=KIN2 PE=2 SV=1	0.568	Down	KIN2	53	6.5512	44.695	18	4	4	8	6	4	4	3	4	4	3	4	1420800000	806980000	1213300000	1.239	0.704	1.058
O22218	Calcium-transporting ATPase 4, plasma membrane-type OS=Arabidopsis thaliana GN=ACA4 PE=1 SV=1	0.662	Down	ACA4	14	112.75	91.542	28	13	7	12	6	10	12	12	12	6	6	7	425930000	282010000	411080000	1.142	0.756	1.102
Q38871	Calcium-dependent protein kinase 5 OS=Arabidopsis thaliana GN=CPK5 PE=2 SV=1	2.12	Up	CPK5	17.1	62.127	87.143	11	6	2	2	6	3	4	6	3	1	2	1	66446000	140920000	66532000	0.728	1.543	0.729
O81884	L-galactose dehydrogenase OS=Arabidopsis thaliana GN=LGALDH PE=1 SV=1	0.77	Down	LGALDH	23.8	34.531	69.844	14	5	5	3	4	7	5	5	5	5	5	5	185970000	143300000	155960000	1.15	0.886	0.964
Q9LFL3	TOM1-like protein 1 OS=Arabidopsis thaliana GN=TOL1 PE=1 SV=1	1.927	Up	TOL1	31.7	45.31	79.8	14	7	7	3	7	4	6	7	7	6	7	7	117790000	226940000	123980000	0.754	1.453	0.794
Q93VE6	AT5g10780/T30N20_50 OS=Arabidopsis thaliana GN=At5g10780 PE=2 SV=1	1.234	Up	At5g10780	13.9	19.908	26.674	5	2	2	2	2	1	2	2	2	2	2	2	11323000	13963000	13842000	0.868	1.071	1.061
Q8LDU4	Red chlorophyll catabolite reductase, chloroplastic OS=Arabidopsis thaliana GN=RCCR PE=1 SV=2	0.72	Down	RCCR	48.3	36.448	192.76	58	17	17	18	19	21	17	16	16	17	16	16	835080000	601160000	682400000	1.182	0.851	0.966
Q9SJL8	S-adenosylmethionine synthase 3 OS=Arabidopsis thaliana GN=METK3 PE=1 SV=1	1.383	Up	METK3	44.4	42.497	73.067	38	18	7	12	11	15	18	17	18	7	6	7	361980000	500520000	400240000	0.86	1.189	0.951
Q9SX65	1,4-dihydroxy-2-naphthoyl-CoA thioesterase 1 OS=Arabidopsis thaliana GN=DHNAT1 PE=1 SV=1	3.464	Up	DHNAT1	26.3	16.712	32.195	5	3	3	1	3	1	2	3	1	2	3	1	12060000	41811000	0	0.448	1.552
Q9LYK9	40S ribosomal protein S26-3 OS=Arabidopsis thaliana GN=RPS26C PE=2 SV=1	1.366	Up	RPS26C	47.7	14.628	50.427	17	5	3	5	5	7	4	4	5	2	2	3	171850000	234760000	233010000	0.806	1.101	1.093
Q681Q7	Uncharacterized protein At1g03900 OS=Arabidopsis thaliana GN=At1g03900 PE=2 SV=1	1.522	Up	At1g03900	11.8	29.795	16.681	4	2	2	1	2	1	2	2	2	2	2	2	15508000	23613000	16815000	0.832	1.266	0.902
Q8VXZ9	Polyadenylate-binding protein RBP47B' OS=Arabidopsis thaliana GN=RBP47B' PE=2 SV=1	1.39	Up	RBP47B'	8.5	46.596	18.59	6	3	3	3	2	1	3	3	3	3	3	3	42386000	58913000	49739000	0.842	1.17	0.988
Q9SGZ5	Probable beta-D-xylosidase 7 OS=Arabidopsis thaliana GN=BXL7 PE=2 SV=2	0.699	Down	BXL7	39	83.891	212.78	32	21	21	12	4	16	19	16	21	19	16	21	355490000	248680000	417680000	1.044	0.73	1.226
Q9LIR4	Dihydroxy-acid dehydratase, chloroplastic OS=Arabidopsis thaliana GN=DHAD PE=1 SV=1	0.667	Down	DHAD	41.3	64.913	191.02	52	21	21	22	15	15	21	21	19	21	21	19	1230500000	820940000	966370000	1.223	0.816	0.961
Q9FMT1	3-isopropylmalate dehydrogenase 3, chloroplastic OS=Arabidopsis thaliana GN=IMDH3 PE=1 SV=1	0.673	Down	IMDH3	48.4	44.161	186.32	56	16	8	20	16	20	16	14	15	8	7	8	1964400000	1321700000	2130100000	1.088	0.732	1.18
Q9LMX4	Probable inactive purple acid phosphatase 1 OS=Arabidopsis thaliana GN=PAP1 PE=2 SV=1	1.294	Up	PAP1	21.9	68.241	84.182	31	12	12	11	14	6	12	11	11	12	11	11	237050000	306440000	220820000	0.93	1.203	0.867
P49243	3-oxoacyl-[acyl-carrier-protein] synthase III, chloroplastic OS=Arabidopsis thaliana GN=At1g62640 PE=2 SV=2	0.806	Down	At1g62640	12.9	42.846	36.98	11	5	5	4	3	4	5	4	4	5	4	4	105990000	85437000	93402000	1.116	0.9	0.984
Q9SE83	Dynamin-2A OS=Arabidopsis thaliana GN=DRP2A PE=1 SV=2	1.325	Up	DRP2A	21.9	99.165	37.734	5	18	4	3	2	0	17	16	16	4	3	4	17048000	22587000	17433000	0.896	1.187	0.916
Q9SSN3	Toll/interleukin-1 receptor-like protein OS=Arabidopsis thaliana GN=TIR PE=1 SV=1	5.072	Up	TIR	40.9	20.245	167.88	18	8	8	5	11	2	6	8	6	6	8	6	100420000	509130000	109110000	0.419	2.125	0.455
Q96252	ATP synthase subunit delta', mitochondrial OS=Arabidopsis thaliana GN=At5g47030 PE=1 SV=1	1.463	Up	At5g47030	30.5	21.547	35.734	12	5	5	4	6	2	5	5	3	5	5	3	244310000	357560000	305670000	0.808	1.182	1.01
Q94FY7	Tocopherol cyclase, chloroplastic OS=Arabidopsis thaliana GN=VTE1 PE=2 SV=1	0.8	Down	VTE1	15	54.72	39.275	15	6	6	6	5	4	5	6	5	5	6	5	136560000	109300000	143730000	1.052	0.842	1.107
A0A1I9LR17	Protein kinase superfamily protein OS=Arabidopsis thaliana GN=At3g61080 PE=4 SV=1	0.649	Down	At3g61080	11.4	39.542	23.436	6	3	3	2	2	2	3	3	3	3	3	3	77749000	50420000	50055000	1.309	0.849	0.843
Q9XIB5	B3 domain-containing protein REM19 OS=Arabidopsis thaliana GN=REM19 PE=1 SV=1	1.892	Up	REM19	25.2	25.85	37.385	7	5	4	2	4	1	3	5	2	2	4	1	21318000	40332000	18930000	0.794	1.502	0.705
Q39247	Serine/threonine protein phosphatase 2A 55 kDa regulatory subunit B beta isoform OS=Arabidopsis thaliana GN=PP2AB2 PE=1 SV=1	1.425	Up	PP2AB2	10.6	56.274	34.119	10	5	3	2	5	3	5	5	4	3	3	2	50455000	71875000	59716000	0.831	1.184	0.984
F4JQG2	U2 snRNP auxilliary factor, large subunit, splicing factor OS=Arabidopsis thaliana GN=ATU2AF65A PE=4 SV=1	2.319	Up	ATU2AF65A	8.2	60.665	19.328	4	3	3	1	3	0	2	3	2	2	3	2	16177000	37537000	18021000	0.677	1.57	0.754
Q9C958	Serine/threonine-protein kinase SRK2B OS=Arabidopsis thaliana GN=SRK2B PE=1 SV=1	2.497	Up	SRK2B	11.4	41.039	23.698	5	3	2	1	3	1	2	3	3	1	2	2	19704000	49159000	20647000	0.66	1.648	0.692
Q9SQZ1	40S ribosomal protein S17-3 OS=Arabidopsis thaliana GN=RPS17C PE=2 SV=3	1.271	Up	RPS17C	30.7	16.036	32.01	14	5	5	6	3	5	4	4	5	4	4	5	165160000	209950000	184400000	0.886	1.126	0.989
Q9SSB8	Cytochrome c oxidase subunit 5b-2, mitochondrial OS=Arabidopsis thaliana GN=COX5B-2 PE=2 SV=1	1.441	Up	COX5B-2	45	18.583	62.464	20	6	4	7	8	5	6	6	5	4	4	3	324450000	467520000	275160000	0.912	1.314	0.774
Q941A7	AT4g20760/F21C20_110 OS=Arabidopsis thaliana GN=At4g20750 PE=2 SV=1	0.782	Down	At4g20750	16.8	32.479	63.956	11	5	5	3	4	4	5	5	4	5	5	4	137880000	107830000	102390000	1.188	0.929	0.882
Q1KPV0	Probable transmembrane GTPase FZO-like, chloroplastic OS=Arabidopsis thaliana GN=FZL PE=1 SV=1	0.751	Down	FZL	14	100.73	66.204	14	11	11	5	3	6	11	10	10	11	10	10	111630000	83844000	118560000	1.066	0.801	1.133
Q9FX94	Probable carboxylesterase 5 OS=Arabidopsis thaliana GN=CXE5 PE=2 SV=1	1.503	Up	CXE5	22.9	35.196	69.043	10	4	4	2	4	4	4	4	4	4	4	4	56737000	85262000	72088000	0.795	1.195	1.01
Q9FN03	Ultraviolet-B receptor UVR8 OS=Arabidopsis thaliana GN=UVR8 PE=1 SV=1	1.2	Up	UVR8	29.1	47.118	151.49	30	10	10	10	10	10	10	9	10	10	9	10	368840000	442140000	422250000	0.897	1.076	1.027
Q9ZVA2	EP1-like glycoprotein 2 OS=Arabidopsis thaliana GN=At1g78830 PE=1 SV=1	1.216	Up	At1g78830	48.1	50.342	319.89	67	16	12	19	24	24	14	15	15	10	11	11	3830900000	4658500000	3515500000	0.957	1.164	0.879
Q0WP12	Thiocyanate methyltransferase 1 OS=Arabidopsis thaliana GN=HOL1 PE=1 SV=1	0.653	Down	HOL1	55.7	27.408	169.48	50	9	9	17	17	16	9	9	9	9	9	9	2690900000	1757500000	1872500000	1.277	0.834	0.889
Q84JZ4	Homoserine dehydrogenase OS=Arabidopsis thaliana GN=At5g21060 PE=2 SV=1	1.637	Up	At5g21060	20.2	40.413	58.126	17	7	7	5	8	4	6	6	5	6	6	5	72674000	119030000	91876000	0.769	1.259	0.972
Q39016	Calcium-dependent protein kinase 11 OS=Arabidopsis thaliana GN=CPK11 PE=1 SV=2	1.821	Up	CPK11	7.5	55.915	21.916	5	3	3	2	3	0	3	3	1	3	3	1	32660000	59422000	0	0.709	1.291
Q93Y09	Serine carboxypeptidase-like 45 OS=Arabidopsis thaliana GN=SCPL45 PE=2 SV=1	1.997	Up	SCPL45	7.2	51.802	19.147	3	3	3	0	3	0	3	3	2	3	3	2	16296000	32571000	13769000	0.781	1.56	0.659
A0A1P8AZR2	Neutral/alkaline non-lysosomal ceramidase OS=Arabidopsis thaliana GN=At2g38010 PE=4 SV=1	0.572	Down	At2g38010	4.9	83.207	21.345	7	3	3	2	2	3	3	3	3	3	3	3	51337000	29393000	51059000	1.169	0.669	1.162
Q8H121	Glutathione S-transferase family protein OS=Arabidopsis thaliana GN=At4g19880 PE=1 SV=1	1.686	Up	At4g19880	20.8	40.575	59.459	17	6	6	5	7	5	4	6	5	4	6	5	61381000	103500000	83820000	0.74	1.248	1.011
Q9FFD2	Probable UDP-arabinopyranose mutase 5 OS=Arabidopsis thaliana GN=RGP5 PE=1 SV=1	1.273	Up	RGP5	23	38.585	45.325	10	6	5	2	3	5	3	5	6	3	4	5	32440000	41300000	35611000	0.89	1.133	0.977
Q9SGI3	At3g1920/F28J7.25 OS=Arabidopsis thaliana GN=At3g01920 PE=2 SV=1	0.693	Down	At3g01920	11.7	33.539	19.423	3	3	3	0	0	3	2	2	3	2	2	3	22280000	15444000	19535000	1.167	0.809	1.024
P46010	Nitrilase 3 OS=Arabidopsis thaliana GN=NIT3 PE=1 SV=1	0.621	Down	NIT3	19.4	38.022	112.98	13	6	2	4	4	5	5	6	6	2	2	2	603910000	374990000	519160000	1.209	0.751	1.04
P61841	30S ribosomal protein S7, chloroplastic OS=Arabidopsis thaliana GN=rps7-A PE=1 SV=1	0.7	Down	rps7-A	46.5	17.357	44.166	21	7	7	7	8	6	7	7	7	7	7	7	506080000	354280000	519450000	1.1	0.77	1.129
Q3E902	40S ribosomal protein S21-2 OS=Arabidopsis thaliana GN=RPS21C PE=1 SV=2	1.577	Up	RPS21C	18.3	9.1131	52.292	8	1	1	3	3	2	1	1	1	1	1	1	40373000	63663000	38547000	0.849	1.339	0.811
Q0WPR4	Serine carboxypeptidase-like 34 OS=Arabidopsis thaliana GN=SCPL34 PE=2 SV=2	0.744	Down	SCPL34	23.8	56.328	73.221	21	10	10	8	7	6	10	10	10	10	10	10	189210000	140610000	186100000	1.1	0.818	1.082
P46422	Glutathione S-transferase F2 OS=Arabidopsis thaliana GN=GSTF2 PE=1 SV=3	1.306	Up	GSTF2	84	24.128	288.58	107	18	7	33	41	33	17	16	17	7	7	7	15437000000	20153000000	11612000000	0.981	1.281	0.738
Q9LIN0	Major latex protein, putative OS=Arabidopsis thaliana GN=At3g26450 PE=1 SV=1	0.675	Down	At3g26450	96.7	17.791	323.31	95	16	10	30	27	38	16	15	16	10	10	10	3430300000	2316100000	3631600000	1.097	0.741	1.162
Q9LKB2	Peptide-N4-(N-acetyl-beta-glucosaminyl)asparagine amidase A protein OS=Arabidopsis thaliana GN=At3g14920 PE=4 SV=1	1.356	Up	At3g14920	7.4	68.995	92.763	9	4	4	3	5	1	3	4	3	3	4	3	57175000	77539000	53411000	0.912	1.237	0.852
Q9SF85	Adenosine kinase 1 OS=Arabidopsis thaliana GN=ADK1 PE=1 SV=1	0.734	Down	ADK1	57.3	37.836	295.04	46	16	6	17	13	16	16	15	16	6	6	6	2182900000	1603200000	2296700000	1.077	0.791	1.133
B9DFE9	3-oxo-5-alpha-steroid 4-dehydrogenase (DUF1295) OS=Arabidopsis thaliana GN=At1g73650 PE=2 SV=1	0.803	Down	At1g73650	6.5	33.058	11.768	3	2	2	1	1	1	2	2	1	2	2	1	19554000	15695000	0	1.109	0.891
P32826	Serine carboxypeptidase-like 49 OS=Arabidopsis thaliana GN=SCPL49 PE=2 SV=2	0.772	Down	SCPL49	14	57.301	70.296	13	5	5	5	4	4	5	5	4	5	5	4	164250000	126920000	138590000	1.147	0.886	0.967
Q93WC8	Protein prenylyltransferase superfamily protein OS=Arabidopsis thaliana GN=At3g04830 PE=2 SV=1	0.823	Down	At3g04830	16.1	33.286	23.141	6	3	3	1	3	2	3	3	3	3	3	3	53417000	43924000	44807000	1.127	0.927	0.946
Q9C969	Aromatic aminotransferase ISS1 OS=Arabidopsis thaliana GN=ISS1 PE=1 SV=1	1.622	Up	ISS1	21.1	43.761	68.823	9	6	6	1	5	3	6	6	5	6	6	5	42416000	68835000	46842000	0.805	1.306	0.889
A0A1P8BF32	Heat shock protein 70 (Hsp 70) family protein OS=Arabidopsis thaliana GN=BIP2 PE=1 SV=1	2.796	Up	BIP2	48.3	74.374	323.31	79	28	3	24	31	24	26	27	25	2	3	3	1069100000	2989600000	1182200000	0.612	1.711	0.677
Q9LP77	Probable inactive receptor kinase At1g48480 OS=Arabidopsis thaliana GN=RKL1 PE=2 SV=1	3.822	Up	RKL1	18.3	71.13	108.52	9	9	8	0	9	0	4	9	5	4	8	5	26020000	99393000	25780000	0.516	1.972	0.512
A0A1I9LND6	Calcineurin-like metallo-phosphoesterase superfamily protein OS=Arabidopsis thaliana GN=At3g09970 PE=4 SV=1	1.601	Up	At3g09970	12.9	29.636	14.502	2	2	2	0	2	0	2	2	0	2	2	0	13841000	22172000	0	0.769	1.231
Q84WU8	ATP-dependent zinc metalloprotease FTSH 3, mitochondrial OS=Arabidopsis thaliana GN=FTSH3 PE=1 SV=1	1.253	Up	FTSH3	5.1	89.352	28.173	11	4	4	4	4	3	3	4	3	3	4	3	23133000	28985000	23539000	0.917	1.149	0.933
P93028	Ubiquitin-activating enzyme E1 1 OS=Arabidopsis thaliana GN=UBA1 PE=1 SV=1	1.552	Up	UBA1	25.2	120.25	196.08	54	24	22	14	22	18	20	23	20	18	21	18	429260000	666120000	449220000	0.834	1.294	0.872
Q07473	Chlorophyll a-b binding protein CP29.1, chloroplastic OS=Arabidopsis thaliana GN=LHCB4.1 PE=1 SV=1	0.703	Down	LHCB4.1	48.6	31.139	85.594	25	12	7	7	7	11	12	11	11	7	7	7	13760000000	9678400000	11368000000	1.186	0.834	0.98
Q9FN48	Calcium sensing receptor, chloroplastic OS=Arabidopsis thaliana GN=CAS PE=1 SV=1	0.595	Down	CAS	49.1	41.285	323.31	86	18	18	26	28	32	17	18	17	17	18	17	4834900000	2874500000	4845700000	1.155	0.687	1.158
F4JKH6	Protein TSS OS=Arabidopsis thaliana GN=TSS PE=1 SV=1	2.041	Up	TSS	12.1	199.11	212.05	28	20	16	4	16	8	15	19	18	12	16	14	86400000	176380000	157360000	0.617	1.259	1.124
A0A178VNS0	2-oxoglutarate (2OG) and Fe(II)-dependent oxygenase superfamily protein OS=Arabidopsis thaliana GN=JMJD5 PE=4 SV=1	0.602	Down	JMJD5	8.4	36.947	16.188	5	2	2	2	1	2	2	2	2	2	2	2	12575000	7568500	12979000	1.139	0.686	1.176
Q8GUI9	Non-lysosomal glucosylceramidase OS=Arabidopsis thaliana GN=At5g49900 PE=2 SV=1	1.481	Up	At5g49900	3.2	106.71	11.113	2	3	2	1	1	0	3	3	3	2	2	2	2589600	3838600	0	0.806	1.194
F4IX90	Phosphoinositide phospholipase C OS=Arabidopsis thaliana GN=PLC2 PE=1 SV=1	1.224	Up	PLC2	18.8	62.477	78.435	10	8	8	3	4	3	8	8	6	8	8	6	77521000	94941000	106860000	0.833	1.02	1.148
Q9LF41	Probable ubiquitin conjugation factor E4 OS=Arabidopsis thaliana GN=PUB1 PE=2 SV=1	2.146	Up	PUB1	5.3	117.53	32.931	5	5	5	0	3	2	3	4	5	3	4	5	18683000	40081000	18941000	0.721	1.547	0.731
A0A1P8B956	Amine oxidase OS=Arabidopsis thaliana GN=At4g12290 PE=3 SV=1	1.4	Up	At4g12290	28	75.318	129.42	34	15	15	10	14	10	13	15	14	13	15	14	564910000	790930000	452330000	0.937	1.312	0.75
P93031	GDP-mannose 4,6 dehydratase 2 OS=Arabidopsis thaliana GN=MUR1 PE=1 SV=3	1.514	Up	MUR1	37	41.961	88.416	28	11	11	7	11	10	8	9	11	8	9	11	232600000	352020000	264890000	0.821	1.243	0.935
Q9M5J8	Polygalacturonase inhibitor 2 OS=Arabidopsis thaliana GN=PGIP2 PE=2 SV=2	0.561	Down	PGIP2	40.9	37.067	95.956	28	11	11	11	4	13	11	10	11	11	10	11	457670000	257000000	623910000	1.026	0.576	1.398
Q38867	Peptidyl-prolyl cis-trans isomerase CYP19-3 OS=Arabidopsis thaliana GN=CYP19-3 PE=2 SV=2	1.28	Up	CYP19-3	38.1	18.92	37.509	15	6	5	4	7	4	5	6	5	4	5	4	82552000	105610000	100480000	0.858	1.098	1.044
Q9SIE3	At2g22230/T26C19.11 OS=Arabidopsis thaliana GN=At2g22230 PE=2 SV=2	0.831	Down	At2g22230	21.8	24.242	22.424	9	4	2	4	2	3	4	4	4	2	2	2	335910000	279000000	251080000	1.164	0.967	0.87
Q9FK59	Eukaryotic translation initiation factor NCBP OS=Arabidopsis thaliana GN=NCBP PE=2 SV=1	1.322	Up	NCBP	19.9	25.745	25.212	10	4	4	4	4	2	3	3	4	3	3	4	21040000	27825000	24825000	0.857	1.133	1.011
A0A1I9LN38	Phragmoplast orienting kinesin 1 OS=Arabidopsis thaliana GN=POK1 PE=3 SV=1	0.82	Down	POK1	0.9	234.81	10.514	2	2	2	1	1	0	2	2	2	2	2	2	69360000	56905000	0	1.099	0.901
Q9LUT0	Protein kinase superfamily protein OS=Arabidopsis thaliana GN=At3g17410 PE=2 SV=1	3.226	Up	At3g17410	22.3	39.562	47.805	13	7	2	2	8	3	5	6	5	1	2	0	36575000	117990000	79349000	0.469	1.513	1.018
Q76FS5	Solanesyl diphosphate synthase 2, chloroplastic OS=Arabidopsis thaliana GN=SPS2 PE=1 SV=1	0.827	Down	SPS2	16.5	46.044	46.14	12	7	5	5	3	4	7	6	6	5	4	4	118150000	97678000	87952000	1.167	0.965	0.869
B7ZWR6	Outer envelope protein 61 OS=Arabidopsis thaliana GN=OEP61 PE=1 SV=1	1.324	Up	OEP61	7.8	60.757	26.008	9	3	3	3	4	2	3	3	3	3	3	3	28085000	37202000	52883000	0.713	0.944	1.343
F4JYC0	Adenylate kinase family protein OS=Arabidopsis thaliana GN=At5g35170 PE=3 SV=1	0.756	Down	At5g35170	45.7	64.913	288.45	74	21	20	26	25	23	20	21	21	19	20	20	1884300000	1424100000	1706300000	1.127	0.852	1.021
Q9SJQ0	Pyruvate kinase OS=Arabidopsis thaliana GN=At2g36580 PE=1 SV=2	3.791	Up	At2g36580	49.5	57.508	67.86	11	20	5	3	5	3	19	20	20	4	5	5	43848000	166350000	95194000	0.431	1.634	0.935
Q9C500	WPP domain-containing protein 2 OS=Arabidopsis thaliana GN=WPP2 PE=1 SV=1	1.239	Up	WPP2	15.6	19.134	18.961	6	3	3	2	3	1	3	3	3	3	3	3	178410000	221130000	169310000	0.941	1.166	0.893
P25858	Glyceraldehyde-3-phosphate dehydrogenase GAPC1, cytosolic OS=Arabidopsis thaliana GN=GAPC1 PE=1 SV=2	3.121	Up	GAPC1	76.6	36.914	52.861	14	27	2	2	9	3	25	26	25	2	2	1	220620000	688030000	237580000	0.577	1.801	0.622
P11829	Acyl carrier protein 1, chloroplastic OS=Arabidopsis thaliana GN=ACP1 PE=1 SV=1	0.649	Down	ACP1	20.4	15.055	68.231	6	3	3	2	2	2	3	3	3	3	3	3	19364000	12553000	28754000	0.957	0.621	1.422
Q9STL1	Cytochrome P450 71A22 OS=Arabidopsis thaliana GN=CYP71A22 PE=2 SV=1	1.531	Up	CYP71A22	8.8	55.998	27.273	7	4	4	2	3	2	4	4	4	4	4	4	24353000	37291000	25752000	0.836	1.28	0.884
Q9SVG4	Berberine bridge enzyme-like 19 OS=Arabidopsis thaliana GN=At4g20830 PE=1 SV=2	1.628	Up	At4g20830	21.8	63.558	92.951	29	13	11	8	10	11	13	13	11	11	11	9	171660000	279610000	186970000	0.807	1.314	0.879
Q9C787	Putative uncharacterized protein OS=Arabidopsis thaliana GN=At1g69510 PE=1 SV=1	1.471	Up	At1g69510	40.1	15.096	24.187	5	5	4	1	3	1	4	4	4	3	4	4	85726000	126150000	76516000	0.892	1.312	0.796
F4IVN6	Calmodulin 5 OS=Arabidopsis thaliana GN=CAM5 PE=4 SV=1	1.254	Up	CAM5	52.5	20.576	55.96	13	12	2	5	4	4	12	12	12	2	2	2	899440000	1128300000	766500000	0.966	1.211	0.823
Q9LVI9	Dihydropyrimidine dehydrogenase (NADP(+)), chloroplastic OS=Arabidopsis thaliana GN=PYD1 PE=1 SV=1	1.319	Up	PYD1	33.8	46.846	128.72	30	12	12	7	13	10	11	12	11	11	12	11	426630000	562940000	330340000	0.97	1.279	0.751
Q9FJW4	NADH dehydrogenase [ubiquinone] iron-sulfur protein 4, mitochondrial OS=Arabidopsis thaliana GN=FRO1 PE=2 SV=1	1.437	Up	FRO1	43.5	17.134	53.979	14	6	6	5	5	4	6	5	5	6	5	5	243720000	349830000	241660000	0.875	1.257	0.868
O23647	1,4-alpha-glucan-branching enzyme 2-1, chloroplastic/amyloplastic OS=Arabidopsis thaliana GN=SBE2.1 PE=1 SV=1	0.716	Down	SBE2.1	15.9	97.659	108.57	18	11	11	7	4	7	10	9	11	10	9	11	206350000	147790000	178330000	1.163	0.833	1.005
Q9C5M8	Probable pectate lyase 18 OS=Arabidopsis thaliana GN=At4g24780 PE=2 SV=2	0.61	Down	At4g24780	25.7	45.013	91.344	20	10	8	8	5	7	9	8	9	8	7	7	308800000	188410000	310920000	1.146	0.699	1.154
O23264	Selenium-binding protein 1 OS=Arabidopsis thaliana GN=SBP1 PE=1 SV=1	0.741	Down	SBP1	26.9	54.056	65.899	20	9	5	7	7	6	9	7	8	5	3	4	205430000	152300000	173470000	1.16	0.86	0.98
P42745	Ubiquitin-conjugating enzyme E2 2 OS=Arabidopsis thaliana GN=UBC2 PE=2 SV=1	2.788	Up	UBC2	17.8	17.279	22.329	6	2	2	1	4	1	1	2	1	1	2	1	45530000	126920000	0	0.528	1.472
A0A1P8ARX5	Pectinesterase OS=Arabidopsis thaliana GN=PMEPCRA PE=4 SV=1	0.428	Down	PMEPCRA	12.3	64.065	58.568	12	6	5	3	2	7	5	4	6	4	3	5	114240000	48828000	145560000	1.11	0.475	1.415
Q93Y12	Alpha glucosidase-like protein OS=Arabidopsis thaliana GN=MDB19.14 PE=2 SV=1	0.79	Down	MDB19.14	7.3	110.88	57.467	13	6	6	5	3	5	6	6	5	6	6	5	55849000	44090000	58350000	1.058	0.836	1.106
A0A1P8BEB3	Vesicle-associated membrane protein 713 OS=Arabidopsis thaliana GN=VAMP713 PE=3 SV=1	0.552	Down	VAMP713	19	25.896	30.911	5	4	3	2	2	1	4	4	4	3	3	3	28564000	15768000	23346000	1.266	0.699	1.035
Q8L940	Pyridoxal 5'-phosphate synthase subunit PDX1.3 OS=Arabidopsis thaliana GN=PDX13 PE=1 SV=2	1.657	Up	PDX13	25.9	33.216	50.812	10	8	4	3	3	4	8	8	8	4	4	4	134600000	223090000	177480000	0.755	1.251	0.995
O80939	L-type lectin-domain containing receptor kinase IV.1 OS=Arabidopsis thaliana GN=LECRK41 PE=2 SV=1	1.775	Up	LECRK41	18.7	75.541	96.479	24	10	9	6	12	6	8	10	7	7	9	6	107000000	189880000	95534000	0.818	1.452	0.73
Q8LBK6	Monothiol glutaredoxin-S15, mitochondrial OS=Arabidopsis thaliana GN=GRXS15 PE=1 SV=2	1.905	Up	GRXS15	32.5	18.734	29.264	7	4	4	2	4	1	4	4	4	4	4	4	52834000	100580000	45142000	0.798	1.52	0.682
A0A1P8B3Z6	Cysteine-rich RLK (RECEPTOR-like protein kinase) 32 OS=Arabidopsis thaliana GN=CRK32 PE=4 SV=1	2.371	Up	CRK32	5.6	72.776	12.506	5	3	1	2	2	1	3	1	2	1	0	0	265640000	629810000	292030000	0.671	1.591	0.738
O65398	Lactoylglutathione lyase OS=Arabidopsis thaliana GN=ATGLX1 PE=1 SV=1	0.636	Down	ATGLX1	44.2	31.928	87.878	40	13	11	14	11	15	13	12	12	11	10	10	2248700000	1430000000	2279500000	1.132	0.72	1.148
F4JRH9	Early nodulin-like protein 19 OS=Arabidopsis thaliana GN=ENODL19 PE=4 SV=1	0.433	Down	ENODL19	38.8	12.01	38.751	12	6	6	5	2	5	6	5	6	6	5	6	305800000	132440000	319300000	1.211	0.524	1.264
Q9LEU8	Argininosuccinate lyase, chloroplastic OS=Arabidopsis thaliana GN=At5g10920 PE=2 SV=1	0.776	Down	At5g10920	45.8	57.512	173.87	53	20	20	20	16	17	19	19	17	19	19	17	620990000	482000000	582340000	1.105	0.858	1.037
Q0WVJ5	At1g09850 OS=Arabidopsis thaliana GN=XBCP3 PE=2 SV=1	0.716	Down	XBCP3	18.5	48.073	91.327	13	5	5	5	3	5	5	5	5	5	5	5	163700000	117150000	151330000	1.136	0.813	1.05
Q67Y99	Clp protease adapter protein ClpF, chloroplastic OS=Arabidopsis thaliana GN=CLPF PE=1 SV=1	1.206	Up	CLPF	30.3	37.44	105.46	14	7	7	5	6	3	7	7	6	7	7	6	83763000	101070000	90191000	0.914	1.102	0.984
Q07488	Blue copper protein OS=Arabidopsis thaliana GN=BCB PE=1 SV=2	2.204	Up	BCB	21.4	20.053	59.306	9	3	3	3	4	2	3	3	3	3	3	3	146090000	322120000	86881000	0.79	1.741	0.47
Q9LHC4	6,7-dimethyl-8-ribityllumazine synthase OS=Arabidopsis thaliana GN=At3g32930 PE=1 SV=1	1.568	Up	At3g32930	10.8	27.432	15.375	9	2	2	3	2	4	2	2	2	2	2	2	48973000	76813000	51723000	0.828	1.298	0.874
A0A1I9LRJ6	Peptidylprolyl isomerase OS=Arabidopsis thaliana GN=At3g60370 PE=4 SV=1	0.819	Down	At3g60370	31.7	30.385	85.766	21	8	8	7	5	9	7	6	8	7	6	8	229720000	188010000	211930000	1.094	0.896	1.01
Q9S7L9	Cytochrome c oxidase subunit 6b-1 OS=Arabidopsis thaliana GN=COX6B-1 PE=1 SV=1	2.037	Up	COX6B-1	30.9	21.195	48.486	13	5	5	3	6	4	4	5	4	4	5	4	40438000	82345000	49988000	0.702	1.43	0.868
Q8VXY4	TIP41-like protein OS=Arabidopsis thaliana GN=TIP41L PE=2 SV=1	2.353	Up	TIP41L	11	33.074	26.509	6	3	3	1	3	2	3	3	3	3	3	3	17483000	41107000	19071000	0.675	1.588	0.737
Q9LFR0	Alpha-mannosidase 2 OS=Arabidopsis thaliana GN=GMII PE=1 SV=1	1.202	Up	GMII	2.6	134.72	19.023	3	3	3	0	1	2	3	2	3	3	2	3	9029300	10850000	12702000	0.831	0.999	1.17
Q9SQI8	Dihydrolipoyllysine-residue acetyltransferase component 4 of pyruvate dehydrogenase complex, chloroplastic OS=Arabidopsis thaliana GN=LTA2 PE=2 SV=1	0.721	Down	LTA2	42.5	50.08	182.06	49	14	12	16	12	21	14	14	14	12	12	12	844990000	610100000	846150000	1.102	0.795	1.103
F4JHW1	Phenazine biosynthesis PhzC/PhzF protein OS=Arabidopsis thaliana GN=At4g02860 PE=4 SV=1	1.719	Up	At4g02860	10.9	34.316	26.534	10	4	4	4	4	2	4	4	3	4	4	3	38125000	65538000	38845000	0.803	1.38	0.818
Q8LG98	Ubiquitin thioesterase otubain-like OS=Arabidopsis thaliana GN=At1g28120 PE=2 SV=2	1.293	Up	At1g28120	5.9	34.434	14.364	5	2	2	2	1	2	2	2	2	2	2	2	24530000	31701000	22781000	0.931	1.204	0.865
A0A1P8B4A9	Peroxidase OS=Arabidopsis thaliana GN=At4g33420 PE=3 SV=1	0.659	Down	At4g33420	33.9	41.23	91.053	13	8	8	6	3	4	8	8	7	8	8	7	185210000	122000000	167610000	1.17	0.771	1.059
Q9C5Z3	Eukaryotic translation initiation factor 3 subunit E OS=Arabidopsis thaliana GN=TIF3E1 PE=1 SV=1	1.42	Up	TIF3E1	13.8	51.749	36.495	9	4	4	3	3	3	3	4	4	3	4	4	32028000	45481000	46206000	0.777	1.103	1.12
Q9LHA4	V-type proton ATPase subunit d2 OS=Arabidopsis thaliana GN=VHA-d2 PE=2 SV=1	1.355	Up	VHA-d2	36.8	40.787	119.56	19	10	2	5	8	6	10	10	9	2	2	2	139410000	188910000	202070000	0.789	1.069	1.143
P93819	3-isopropylmalate dehydrogenase 2, chloroplastic OS=Arabidopsis thaliana GN=IMDH2 PE=1 SV=1	0.667	Down	MDH2	45.9	43.37	125.35	20	13	6	7	6	7	12	12	12	5	6	6	395290000	263530000	250140000	1.305	0.87	0.826
Q9SYL9	50S ribosomal protein L13, chloroplastic OS=Arabidopsis thaliana GN=RPL13 PE=2 SV=1	0.795	Down	RPL13	28.6	26.788	118.76	38	7	7	13	8	17	7	7	7	7	7	7	824580000	656050000	1090800000	0.962	0.765	1.273
Q9SJQ9	Fructose-bisphosphate aldolase 6, cytosolic OS=Arabidopsis thaliana GN=FBA6 PE=1 SV=1	0.784	Down	FBA6	76.8	38.386	310.23	87	26	15	35	25	27	24	23	23	15	13	13	8839000000	6931100000	8626500000	1.087	0.852	1.061
Q9SAJ4	phosphoglycerate kinase protein OS=Arabidopsis thaliana GN=PGK3 PE=4 SV=1	0.553	Down	PGK3	9.6	41.759	21.813	5	2	2	2	1	2	2	2	2	2	2	2	68508000	37879000	53805000	1.283	0.709	1.008
Q8VZG7	Ribonuclease TUDOR 1 OS=Arabidopsis thaliana GN=TSN1 PE=1 SV=1	1.382	Up	TSN1	21.6	108.23	92.951	27	20	10	8	11	8	18	20	16	8	10	7	192810000	266500000	194530000	0.885	1.223	0.893
F4JGL5	NAD(P)H dehydrogenase B2 OS=Arabidopsis thaliana GN=NDB2 PE=4 SV=1	2.107	Up	NDB2	22	69.242	125.88	18	11	11	6	10	2	9	11	9	9	11	9	103100000	217100000	97675000	0.74	1.559	0.701
Q9M885	40S ribosomal protein S7-2 OS=Arabidopsis thaliana GN=RPS7B PE=2 SV=1	1.419	Up	RPS7B	41.9	22.196	33.842	7	6	3	2	2	3	6	6	6	3	3	3	18999000	26950000	23689000	0.818	1.161	1.021
Q9SUC6	Berberine bridge enzyme-like 22 OS=Arabidopsis thaliana GN=FAD-OXR PE=2 SV=1	1.373	Up	FAD-OXR	9.8	60.409	28.453	10	5	5	2	5	3	4	5	4	4	5	4	31244000	42919000	29554000	0.904	1.241	0.855
Q01908	ATP synthase gamma chain 1, chloroplastic OS=Arabidopsis thaliana GN=ATPC1 PE=1 SV=1	0.67	Down	ATPC1	52	40.911	323.31	124	18	18	45	37	42	18	17	18	18	17	18	14309000000	9585800000	14803000000	1.109	0.743	1.148
Q9LJG3	GDSL esterase/lipase ESM1 OS=Arabidopsis thaliana GN=ESM1 PE=1 SV=1	0.537	Down	ESM1	43.9	44.06	323.31	150	12	3	56	38	56	12	12	12	3	3	3	24322000000	13053000000	23441000000	1.2	0.644	1.156
Q9SJU4	Fructose-bisphosphate aldolase 1, chloroplastic OS=Arabidopsis thaliana GN=FBA1 PE=1 SV=2	0.736	Down	FBA1	75.2	42.93	306.88	102	22	12	37	34	31	21	21	20	11	11	10	12433000000	9146000000	12073000000	1.108	0.815	1.076
Q9FMN0	Putative uncharacterized protein OS=Arabidopsis thaliana GN=SCP2 PE=2 SV=1	2.026	Up	SCP2	30.1	13.568	26.861	8	3	3	2	3	3	3	3	3	3	3	3	58927000	119340000	50017000	0.774	1.568	0.657
Q0WRA3	ATPase E1 OS=Arabidopsis thaliana GN=ATE1 PE=1 SV=1	1.751	Up	ATE1	11.9	19.809	14.128	5	2	2	2	2	1	2	2	2	2	2	2	11437000	20032000	12092000	0.788	1.38	0.833
P43082	Hevein-like preproprotein OS=Arabidopsis thaliana GN=HEL PE=1 SV=1	0.765	Down	HEL	25.9	22.936	37.946	15	4	4	5	6	4	4	3	3	4	3	3	756390000	578490000	596140000	1.175	0.899	0.926
O23157	AT4g37300/C7A10_60 OS=Arabidopsis thaliana GN=C7A10.60 PE=1 SV=1	0.586	Down	C7A10.60	67.1	18.815	167.83	26	10	10	13	5	8	10	8	7	10	8	7	434870000	254820000	300350000	1.318	0.772	0.91
Q9ZW34	Cytosolic enolase 3 OS=Arabidopsis thaliana GN=ENO3 PE=1 SV=1	1.486	Up	ENO3	8.8	51.599	25.25	3	4	4	0	3	0	4	4	4	4	4	4	22230000	33040000	21945000	0.864	1.284	0.853
Q9M0A7	Gamma-glutamyl peptidase 1 OS=Arabidopsis thaliana GN=GGP1 PE=1 SV=1	1.709	Up	GGP1	36.8	28.385	92.121	19	7	7	4	9	6	7	7	6	7	7	6	207420000	354320000	199550000	0.817	1.396	0.786
Q9LFM4	At5g11330 OS=Arabidopsis thaliana GN=At5g11330 PE=2 SV=1	1.301	Up	At5g11330	31.1	45.764	84.696	12	8	8	7	5	0	8	7	1	8	7	1	80077000	104280000	0	0.869	1.131
Q8L831	Nudix hydrolase 3 OS=Arabidopsis thaliana GN=NUDT3 PE=1 SV=1	0.717	Down	NUDT3	24.7	86.856	246.59	32	16	16	13	7	12	16	15	15	16	15	15	447020000	320520000	510470000	1.049	0.752	1.198
Q9LTD9	Uncharacterized protein PAM68-like OS=Arabidopsis thaliana GN=At5g52780 PE=2 SV=1	1.242	Up	At5g52780	14.9	18.748	10.286	5	1	1	2	2	1	1	1	1	1	1	1	32557000	40455000	30498000	0.944	1.172	0.884
Q8H0Y9	Acyl-CoA N-acyltransferases (NAT) superfamily protein OS=Arabidopsis thaliana GN=At1g21770 PE=2 SV=1	2.155	Up	At1g21770	36.9	12.561	38.364	11	5	5	4	4	3	4	4	5	4	4	5	103150000	222070000	106120000	0.717	1.545	0.738
Q94K30	AT1G01800 protein OS=Arabidopsis thaliana GN=At1g01800 PE=2 SV=1	1.433	Up	At1g01800	24.1	31.66	50.3	16	7	6	7	6	3	7	7	7	6	6	6	146430000	209870000	133890000	0.896	1.284	0.819
Q9ZUY6	UDP-D-apiose/UDP-D-xylose synthase 1 OS=Arabidopsis thaliana GN=AXS1 PE=1 SV=1	1.418	Up	AXS1	43.7	43.637	139.67	39	15	5	9	14	16	15	15	15	5	5	5	356540000	505610000	562560000	0.751	1.065	1.185
P58684	Probable signal peptidase complex subunit 2 OS=Arabidopsis thaliana GN=At2g39960 PE=2 SV=1	1.288	Up	At2g39960	11.5	21.642	14.347	4	2	2	1	2	1	2	2	1	2	2	1	33773000	43525000	0	0.874	1.126
A0A1P8B0S6	Uncharacterized protein OS=Arabidopsis thaliana GN=At2g34510 PE=4 SV=1	1.433	Up	At2g34510	25.4	34.879	51.192	14	6	6	4	5	5	5	6	5	5	6	5	56467000	80925000	75313000	0.796	1.141	1.062
A0A1I9LP70	Plastid-lipid associated protein PAP / fibrillin family protein OS=Arabidopsis thaliana GN=At3g26080 PE=4 SV=1	1.432	Up	At3g26080	23.6	29.717	20.895	6	6	2	2	2	2	6	6	6	2	2	2	16655000	23834000	24039000	0.774	1.108	1.118
Q84WV7	Adaptin ear-binding coat-associated protein 1 NECAP-1 OS=Arabidopsis thaliana GN=At3g58600 PE=2 SV=1	1.469	Up	At3g58600	12.9	33.917	30.273	7	3	3	3	2	2	3	3	3	3	3	3	21341000	31363000	23363000	0.842	1.237	0.921
Q8LCY2	Iron-sulfur assembly protein IscA-like 2, mitochondrial OS=Arabidopsis thaliana GN=At5g03905 PE=2 SV=2	1.211	Up	At5g03905	15.2	17.414	11.415	2	2	2	0	2	0	2	2	2	2	2	2	22231000	26909000	23745000	0.915	1.108	0.977
O64733	UDP-glycosyltransferase 87A2 OS=Arabidopsis thaliana GN=UGT87A2 PE=1 SV=1	3.726	Up	UGT87A2	20	51.728	60.587	11	9	9	1	9	1	6	9	6	6	9	6	37419000	139320000	28331000	0.547	2.038	0.414
P23586	Sugar transport protein 1 OS=Arabidopsis thaliana GN=STP1 PE=1 SV=2	1.512	Up	STP1	11.5	57.61	41.596	9	6	6	2	3	4	5	5	5	5	5	5	41406000	62582000	29559000	0.93	1.406	0.664
A0A1I9LTL2	E3 UFM1-protein ligase-like protein OS=Arabidopsis thaliana GN=At3g46220 PE=1 SV=1	1.87	Up	At3g46220	3.5	86.611	13.166	4	2	2	1	2	1	2	2	2	2	2	2	8090100	15135000	8387200	0.768	1.436	0.796
Q93Z74	AT3g27570/MMJ24_12 OS=Arabidopsis thaliana GN=At3g27570 PE=1 SV=1	1.345	Up	At3g27570	19.7	37.147	65.976	15	7	7	5	4	6	7	7	6	7	7	6	183400000	246520000	205850000	0.865	1.163	0.971
Q9STG9	Amidophosphoribosyltransferase 2, chloroplastic OS=Arabidopsis thaliana GN=ASE2 PE=1 SV=1	1.218	Up	ASE2	19.8	61.03	58.64	18	9	9	4	9	5	9	9	9	9	9	9	175660000	213950000	183820000	0.919	1.119	0.962
F4IQ73	Phosphoenolpyruvate carboxylase family protein OS=Arabidopsis thaliana GN=At2g43180 PE=4 SV=1	0.75	Down	At2g43180	20.1	51.857	76.547	12	6	6	5	4	3	6	5	6	6	5	6	99023000	74225000	90519000	1.126	0.844	1.03
Q9LJ87	Protein CDC73 homolog OS=Arabidopsis thaliana GN=CDC73 PE=1 SV=1	1.809	Up	CDC73	7.2	47.543	16.911	3	2	2	0	2	1	2	2	1	2	2	1	38625000	69831000	0	0.712	1.288
Q9M1E7	Tetraspanin-3 OS=Arabidopsis thaliana GN=TET3 PE=1 SV=1	0.774	Down	TET3	7.4	31.888	11.983	5	2	2	1	1	3	2	2	2	2	2	2	26841000	20777000	41032000	0.908	0.703	1.389
F4K5T4	Probable transcription factor At5g28040 OS=Arabidopsis thaliana GN=At5g28040 PE=1 SV=1	1.979	Up	At5g28040	2.3	46.906	7.969	3	1	1	0	2	1	1	1	1	1	1	1	9698600	19203000	8942800	0.769	1.522	0.709
F4JXE3	RNA-binding (RRM/RBD/RNP motifs) family protein OS=Arabidopsis thaliana GN=MMN10.26 PE=1 SV=1	1.399	Up	MMN10.26	42	25.842	75.428	17	8	8	5	8	4	7	8	6	7	8	6	113640000	158920000	98243000	0.919	1.286	0.795
B9DG63	AT4G28030 protein OS=Arabidopsis thaliana GN=At4g28030 PE=2 SV=1	1.486	Up	At4g28030	9.5	29.2	15.733	3	2	2	1	2	0	2	2	2	2	2	2	19157000	28457000	18980000	0.863	1.282	0.855
Q9SI75	Elongation factor G, chloroplastic OS=Arabidopsis thaliana GN=CPEFG PE=1 SV=1	1.311	Up	CPEFG	47.8	86.057	323.31	106	29	29	29	40	37	28	29	28	28	29	28	1867700000	2449400000	2082500000	0.876	1.148	0.976
Q945Q5	At2g30700/T11J7.9 OS=Arabidopsis thaliana GN=At2g30695 PE=2 SV=1	0.784	Down	At2g30695	39.2	22.26	107.5	34	10	10	11	12	11	10	10	10	10	10	10	641420000	502830000	559970000	1.129	0.885	0.986
Q94K85	Cathepsin B-like protease 3 OS=Arabidopsis thaliana GN=CATHB3 PE=1 SV=1	1.445	Up	CATHB3	29.5	39.417	133.48	28	8	8	9	10	9	8	8	7	8	8	7	672810000	972430000	616070000	0.893	1.29	0.817
Q9SCT5	AT3g51730/T18N14_110 OS=Arabidopsis thaliana GN=T18N14.110 PE=2 SV=1	1.721	Up	T18N14.110	11.3	24.098	21.228	6	2	2	2	3	1	2	2	2	2	2	2	27233000	46846000	58928000	0.614	1.057	1.329
P36428	Alanine--tRNA ligase OS=Arabidopsis thaliana GN=ALATS PE=1 SV=3	1.223	Up	ALATS	34.7	110.49	313.66	85	31	31	27	32	26	29	30	30	29	30	30	930280000	1138100000	1018500000	0.904	1.106	0.99
Q43125	Cryptochrome-1 OS=Arabidopsis thaliana GN=CRY1 PE=1 SV=2	0.52	Down	CRY1	8.8	76.694	58.499	9	5	5	3	2	4	4	3	5	4	3	5	60839000	31642000	38750000	1.391	0.723	0.886
Q9M9Q6	Serine carboxypeptidase-like 50 OS=Arabidopsis thaliana GN=SCPL50 PE=2 SV=1	0.428	Down	SCPL50	13.3	49.222	39.026	9	5	5	5	1	3	5	3	5	5	3	5	82029000	35101000	87405000	1.203	0.515	1.282
Q84JW0	3-dehydroquinate synthase OS=Arabidopsis thaliana GN=At3g28760 PE=2 SV=1	0.281	Down	At3g28760	23.9	47.047	46.908	10	6	6	3	1	6	6	4	6	6	4	6	95761000	26885000	52971000	1.636	0.459	0.905
Q9MBH2	Protein AIG2 B OS=Arabidopsis thaliana GN=AIG2B PE=2 SV=1	0.821	Down	AIG2B	74	19.465	249.95	58	11	11	19	21	18	11	11	11	11	11	11	2027200000	1664900000	1736600000	1.12	0.92	0.96
O64768	Kinase superfamily with octicosapeptide/Phox/Bem1p domain-containing protein OS=Arabidopsis thaliana GN=At2g35050 PE=1 SV=1	1.224	Up	At2g35050	6.1	139.7	38.8	6	6	6	0	4	2	5	6	2	5	6	2	40845000	49985000	43042000	0.915	1.12	0.965
O80988	Glycine dehydrogenase (decarboxylating) 2, mitochondrial OS=Arabidopsis thaliana GN=GLDP2 PE=1 SV=1	1.357	Up	GLDP2	46.6	113.77	257.7	50	35	15	15	20	15	35	35	35	15	15	15	1052800000	1429100000	1274200000	0.841	1.141	1.018
P16180	30S ribosomal protein S17, chloroplastic OS=Arabidopsis thaliana GN=RPS17 PE=1 SV=1	0.726	Down	RPS17	38.9	16.282	43.622	26	6	6	8	9	9	6	6	6	6	6	6	664430000	482240000	607960000	1.136	0.825	1.039
P42795	60S ribosomal protein L11-1 OS=Arabidopsis thaliana GN=RPL11A PE=2 SV=2	0.736	Down	RPL11A	26.4	20.831	49.736	14	5	5	7	4	3	5	5	5	5	5	5	906590000	667420000	956290000	1.075	0.791	1.134
Q9SLC8	ESSS subunit of NADH:ubiquinone oxidoreductase (Complex I) protein OS=Arabidopsis thaliana GN=MHK10.3 PE=2 SV=1	1.467	Up	MHK10.3	17.5	12.632	13.326	6	2	1	1	2	3	2	2	2	1	1	1	59173000	86876000	54376000	0.886	1.3	0.814
P55217	Cystathionine gamma-synthase 1, chloroplastic OS=Arabidopsis thaliana GN=CGS1 PE=1 SV=3	0.83	Down	CGS1	16.3	59.918	54.225	13	8	8	4	5	4	8	7	8	8	7	8	151290000	125490000	169350000	1.017	0.844	1.139
F4KBV0	Transcriptional coactivator/pterin dehydratase OS=Arabidopsis thaliana GN=MWD22.5 PE=4 SV=1	1.427	Up	MWD22.5	28.5	20.908	33.452	6	4	4	1	4	1	2	4	3	2	4	3	17898000	25543000	20795000	0.836	1.193	0.971
Q9LYR4	Aldolase-type TIM barrel family protein OS=Arabidopsis thaliana GN=TRA2 PE=2 SV=1	1.596	Up	TRA2	40	47.698	190.5	46	18	18	15	14	17	14	17	17	14	17	17	483330000	771940000	562510000	0.798	1.274	0.928
Q9SKI0	At2g10940/F15K19.1 OS=Arabidopsis thaliana GN=At2g10940 PE=2 SV=1	0.676	Down	At2g10940	10	29.648	19.801	9	3	3	4	2	3	2	3	2	2	3	2	536350000	362540000	741820000	0.981	0.663	1.356
Q9FGE4	Putative uncharacterized protein OS=Arabidopsis thaliana GN=At5g24460 PE=2 SV=1	1.209	Up	At5g24460	40.3	33.448	71.24	15	8	8	5	8	2	8	7	7	8	7	7	139140000	168190000	111910000	0.996	1.204	0.801
A2RVV4	At5g57700 OS=Arabidopsis thaliana GN=MRI1.6 PE=2 SV=1	0.773	Down	MRI1.6	11.5	38.478	20.782	6	3	3	1	3	2	3	3	3	3	3	3	53926000	41668000	51997000	1.096	0.847	1.057
Q8L9X1	Alpha/beta-Hydrolases superfamily protein OS=Arabidopsis thaliana GN=At5g20060 PE=1 SV=1	1.886	Up	At5g20060	4.8	26.727	7.2756	7	1	1	2	2	3	1	1	1	1	1	1	15839000	29888000	29852000	0.629	1.186	1.185
Q8LFC0	Isocitrate dehydrogenase [NAD] regulatory subunit 1, mitochondrial OS=Arabidopsis thaliana GN=IDH1 PE=1 SV=2	1.268	Up	IDH1	32.4	39.626	183.91	41	10	6	16	9	16	10	10	10	6	6	6	784990000	995870000	752230000	0.93	1.179	0.891
Q9XFS9	1-deoxy-D-xylulose 5-phosphate reductoisomerase, chloroplastic OS=Arabidopsis thaliana GN=DXR PE=2 SV=2	1.351	Up	DXR	61.4	51.963	277.82	55	24	24	15	20	20	20	23	23	20	23	23	449660000	607130000	585590000	0.821	1.109	1.07
O23290	60S ribosomal protein L36a OS=Arabidopsis thaliana GN=RPL36AA PE=3 SV=3	0.649	Down	RPL36AA	25.7	12.125	21.102	9	3	3	1	5	3	3	3	3	3	3	3	258760000	167880000	305600000	1.06	0.688	1.252
Q9SQR4	NADPH-dependent aldehyde reductase-like protein, chloroplastic OS=Arabidopsis thaliana GN=At3g03980 PE=3 SV=1	0.77	Down	At3g03980	38.5	28.146	83.018	17	7	7	6	6	5	7	7	7	7	7	7	147640000	113810000	120830000	1.159	0.893	0.948
Q9LQ04	Bifunctional dTDP-4-dehydrorhamnose 3,5-epimerase/dTDP-4-dehydrorhamnose reductase OS=Arabidopsis thaliana GN=NRS/ER PE=1 SV=1	1.803	Up	NRS/ER	19.3	33.597	27.689	8	5	4	1	3	4	3	5	4	2	4	3	39459000	71156000	81006000	0.618	1.114	1.268
Q39258	V-type proton ATPase subunit E1 OS=Arabidopsis thaliana GN=VHA-E1 PE=1 SV=2	0.821	Down	VHA-E1	72.6	26.06	192.29	93	19	10	33	33	27	18	19	16	9	10	9	5429700000	4456000000	4641400000	1.121	0.92	0.958
Q9SHP0	Phosphoserine aminotransferase 2, chloroplastic OS=Arabidopsis thaliana GN=PSAT2 PE=1 SV=1	0.645	Down	PSAT2	25.8	46.633	13.962	3	9	2	1	1	1	9	9	9	2	2	2	19328000	12470000	20698000	1.105	0.713	1.183
F4JHE9	K+ efflux antiporter 2 OS=Arabidopsis thaliana GN=KEA2 PE=1 SV=1	1.485	Up	KEA2	7.4	127.6	41.723	8	7	5	2	3	3	7	5	7	5	3	5	36102000	53606000	49920000	0.776	1.152	1.073
F4JHS4	Adenine nucleotide transporter 1 OS=Arabidopsis thaliana GN=ADNT1 PE=1 SV=1	0.797	Down	ADNT1	24.6	39.978	89.054	13	9	9	6	2	5	8	7	8	8	7	8	145820000	116210000	164880000	1.025	0.817	1.159
Q93ZK1	AT3g56060/F18O21_20 OS=Arabidopsis thaliana GN=At3g56060 PE=2 SV=1	0.657	Down	At3g56060	11.1	63.357	37.25	7	5	5	4	1	2	5	2	3	5	2	3	50270000	33006000	70257000	0.982	0.645	1.373
P19366	ATP synthase subunit beta, chloroplastic OS=Arabidopsis thaliana GN=atpB PE=1 SV=2	0.734	Down	atpB	92.2	53.933	323.31	757	39	38	260	232	265	38	38	39	37	37	38	142620000000	104590000000	118690000000	1.169	0.858	0.973
Q9LPU3	DNAJ heat shock N-terminal domain-containing protein OS=Arabidopsis thaliana GN=At1g21080 PE=2 SV=1	1.344	Up	At1g21080	12.5	43.923	24.351	8	3	3	3	3	2	3	3	3	3	3	3	51109000	68694000	44392000	0.934	1.255	0.811
A0A1P8ATS2	Plastid transcriptionally active 4 OS=Arabidopsis thaliana GN=PTAC4 PE=4 SV=1	1.25	Up	PTAC4	58.7	28.912	193.3	58	14	14	19	21	18	13	13	13	13	13	13	813180000	1016400000	681860000	0.971	1.214	0.815
Q05212	DNA damage-repair/toleration protein DRT102 OS=Arabidopsis thaliana GN=DRT102 PE=1 SV=2	0.649	Down	DRT102	27.1	33.233	56.034	17	7	7	6	4	7	7	7	6	7	7	6	139640000	90694000	115650000	1.211	0.786	1.003
P56774	Cytochrome b6-f complex subunit 4 OS=Arabidopsis thaliana GN=petD PE=3 SV=1	0.722	Down	petD	6.2	17.431	8.6494	14	1	1	5	4	5	1	1	1	1	1	1	236890000	171100000	230300000	1.113	0.804	1.082
Q9SSC1	MAPK kinase substrate protein At1g80180 OS=Arabidopsis thaliana GN=At1g80180 PE=1 SV=1	1.711	Up	At1g80180	34.8	15.106	34.484	5	3	3	2	2	1	3	3	3	3	3	3	39897000	68222000	30844000	0.861	1.473	0.666
Q9SJF3	mRNA-decapping enzyme-like protein OS=Arabidopsis thaliana GN=At1g08370 PE=1 SV=2	2.94	Up	At1g08370	15.5	40.61	36.853	6	5	5	0	5	1	2	5	4	2	5	4	12816000	37700000	10252000	0.633	1.861	0.506
Q9FG38	Sorting nexin 1 OS=Arabidopsis thaliana GN=SNX1 PE=1 SV=1	1.306	Up	SNX1	26.1	46.523	79.699	21	11	11	4	8	9	8	9	10	8	9	10	60287000	78789000	67629000	0.875	1.143	0.982
Q9MAU6	Protein disulfide-isomerase like 2-2 OS=Arabidopsis thaliana GN=PDIL2-2 PE=2 SV=2	3.15	Up	PDIL2-2	8.5	48.403	19.742	4	3	3	1	3	0	3	3	2	3	3	2	18571000	58464000	14677000	0.607	1.912	0.48
Q9FE65	60S ribosomal protein L34-2 OS=Arabidopsis thaliana GN=RPL34B PE=3 SV=1	1.708	Up	RPL34B	34.5	13.65	32.165	10	5	3	3	3	4	3	4	3	1	3	1	174340000	297500000	315480000	0.664	1.134	1.202
Q8RXK8	Isoleucine--tRNA ligase, chloroplastic/mitochondrial OS=Arabidopsis thaliana GN=OVA2 PE=2 SV=1	1.524	Up	OVA2	14.3	123.01	71.491	20	11	11	6	9	5	10	11	11	10	11	11	136780000	208580000	182200000	0.778	1.186	1.036
O23249	Cyclin-dependent kinases regulatory subunit 1 OS=Arabidopsis thaliana GN=CKS1 PE=1 SV=1	3.055	Up	CKS1	31	10.521	18.535	5	3	3	1	3	1	2	3	2	2	3	2	11746000	35885000	10906000	0.602	1.839	0.559
A8MRC4	Translation elongation factor EF1B/ribosomal protein S6 family protein OS=Arabidopsis thaliana GN=eEF-1Bb1 PE=1 SV=1	1.26	Up	eEF-1Bb1	62.7	28.776	172.02	32	11	7	11	12	9	9	11	9	6	7	5	1143400000	1440300000	1003000000	0.956	1.205	0.839
P27521	Chlorophyll a-b binding protein 4, chloroplastic OS=Arabidopsis thaliana GN=LHCA4 PE=1 SV=1	1.408	Up	LHCA4	31.5	27.733	184.56	23	5	5	7	8	8	5	5	5	5	5	5	562750000	792510000	660370000	0.838	1.18	0.983
Q9ZRW8	Glutathione S-transferase U19 OS=Arabidopsis thaliana GN=GSTU19 PE=1 SV=1	0.8	Down	GSTU19	53	25.65	146.68	78	17	16	26	24	28	17	16	17	16	15	16	5650500000	4518400000	5755900000	1.064	0.851	1.084
Q39173	NADP-dependent alkenal double bond reductase P2 OS=Arabidopsis thaliana GN=P2 PE=2 SV=2	0.793	Down	P2	32.7	37.988	41.127	12	10	3	4	3	5	10	9	9	3	3	2	129580000	102830000	107900000	1.142	0.906	0.951
Q8VYC9	Coiled-coil protein OS=Arabidopsis thaliana GN=At1g16210 PE=2 SV=1	1.78	Up	At1g16210	36.8	26.826	58.458	18	8	8	7	7	4	7	7	7	7	7	7	156810000	279100000	141910000	0.814	1.449	0.737
A0A178V7F9	Glucan synthase-like 10 OS=Arabidopsis thaliana GN=GSL10 PE=4 SV=1	0.75	Down	GSL10	3	217.38	24.643	4	4	4	2	1	1	3	3	3	3	3	3	15921000	11946000	0	1.143	0.857
F4I2Z0	Tetratricopeptide repeat (TPR)-like superfamily protein OS=Arabidopsis thaliana GN=At1g22700 PE=4 SV=1	1.223	Up	At1g22700	24.2	23.811	32.696	10	5	5	3	5	2	4	5	3	4	5	3	73861000	90321000	86561000	0.884	1.081	1.036
Q9S720	PsbP domain-containing protein 3, chloroplastic OS=Arabidopsis thaliana GN=PPD3 PE=1 SV=2	0.825	Down	PPD3	24.3	27.489	94.831	19	4	4	6	7	6	4	4	4	4	4	4	850730000	702120000	572040000	1.201	0.991	0.808
Q9SD66	Putative uncharacterized protein OS=Arabidopsis thaliana GN=F13I12.120 PE=1 SV=1	0.81	Down	F13I12.120	70	10.53	144.78	39	8	8	12	13	14	8	8	7	8	8	7	2368300000	1919300000	1621100000	1.202	0.974	0.823
Q9SUR6	Cystine lyase CORI3 OS=Arabidopsis thaliana GN=CORI3 PE=1 SV=1	0.371	Down	CORI3	67.1	47.038	323.31	99	24	24	35	23	41	22	20	24	22	20	24	5924200000	2196700000	6433800000	1.221	0.453	1.326
A0A1P8ATZ4	GT-2-like 1 OS=Arabidopsis thaliana GN=GTL1 PE=4 SV=1	2.422	Up	GTL1	2.9	65.442	11.678	3	2	2	0	2	1	2	2	2	2	2	2	9785500	23725000	9123200	0.689	1.669	0.642
Q03251	Glycine-rich RNA-binding protein 8 OS=Arabidopsis thaliana GN=RBG8 PE=1 SV=1	0.723	Down	RBG8	49.7	16.578	198.72	28	7	5	8	10	10	7	7	7	5	5	5	2135600000	1545000000	1472900000	1.243	0.899	0.857
Q9LJN4	Probable beta-D-xylosidase 5 OS=Arabidopsis thaliana GN=BXL5 PE=2 SV=2	0.587	Down	BXL5	7.4	85.499	31.296	7	5	5	3	1	3	4	2	5	4	2	5	27306000	16019000	46352000	0.913	0.536	1.551
Q94JS1	AT4g26860/F10M23_200 OS=Arabidopsis thaliana GN=At4g26860 PE=1 SV=1	1.294	Up	At4g26860	11.1	26.638	12.565	4	2	2	1	2	1	2	2	1	2	2	1	17973000	23266000	0	0.872	1.128
O80653	SNW/SKI-interacting protein OS=Arabidopsis thaliana GN=SKIP PE=1 SV=1	1.745	Up	SKIP	8.6	69.422	32.941	5	4	4	2	3	0	4	4	3	4	4	3	32757000	57186000	32345000	0.804	1.403	0.793
F4I116	Leucine--tRNA ligase, cytoplasmic OS=Arabidopsis thaliana GN=At1g09620 PE=1 SV=1	1.611	Up	At1g09620	8	123.45	50.608	14	7	7	6	6	2	6	6	4	6	6	4	38229000	61637000	45344000	0.79	1.273	0.937
Q9C7S3	Inner membrane localized protein OS=Arabidopsis thaliana GN=At1g42960 PE=2 SV=1	0.386	Down	At1g42960	13.7	17.829	13.582	7	2	2	2	2	3	2	2	2	2	2	2	499510000	193050000	209070000	1.662	0.642	0.696
O04420	Uricase OS=Arabidopsis thaliana GN=At2g26230 PE=1 SV=2	0.799	Down	At2g26230	12.9	34.88	25.467	8	4	4	3	3	2	3	4	4	3	4	4	39813000	31838000	33160000	1.14	0.911	0.949
O24603	Endochitinase CHI OS=Arabidopsis thaliana GN=CHI PE=2 SV=1	5.41	Up	CHI	34.7	29.775	158.09	18	7	7	4	11	3	6	7	4	6	7	4	112990000	612090000	65952000	0.429	2.321	0.25
Q9SGZ8	F28K19.24 OS=Arabidopsis thaliana GN=At1g78020 PE=1 SV=1	0.633	Down	At1g78020	14.2	17.687	15.2	3	2	2	2	0	1	2	2	2	2	2	2	25841000	16367000	18539000	1.276	0.808	0.916
Q9C8E6	Protein PLASTID MOVEMENT IMPAIRED 1 OS=Arabidopsis thaliana GN=PMI1 PE=1 SV=1	1.369	Up	PMI1	19.8	93.874	153.13	27	12	12	7	13	7	10	12	9	10	12	9	155090000	212220000	180730000	0.849	1.162	0.989
A8MRL0	Histone superfamily protein OS=Arabidopsis thaliana GN=H3.3 PE=3 SV=1	0.818	Down	H3.3	33.5	18.702	46.528	9	4	2	4	2	3	4	4	4	2	2	2	689050000	563230000	623560000	1.102	0.901	0.997
Q6NQM0	At3g01800 OS=Arabidopsis thaliana GN=At3g01800 PE=2 SV=1	1.639	Up	At3g01800	18.7	29.172	23.606	6	3	3	2	2	2	3	3	2	3	3	2	22420000	36748000	20334000	0.846	1.387	0.767
Q8LCW9	60S acidic ribosomal protein P1-1 OS=Arabidopsis thaliana GN=RPP1A PE=3 SV=2	2.049	Up	RPP1A	72.3	11.162	51.544	5	3	2	0	4	1	2	3	3	2	2	2	35116000	72016000	36290000	0.735	1.506	0.759
A0A1P8B6K2	Modifier of snc1 OS=Arabidopsis thaliana GN=MOS1 PE=1 SV=1	1.212	Up	MOS1	4.9	151.21	42.724	13	6	6	4	6	3	5	6	5	5	6	5	38625000	46821000	55742000	0.821	0.995	1.184
Q9S713	Serine/threonine-protein kinase STN7, chloroplastic OS=Arabidopsis thaliana GN=STN7 PE=1 SV=1	0.79	Down	STN7	15.1	63.251	54.175	13	8	8	5	5	3	7	8	8	7	8	8	133350000	105490000	124320000	1.102	0.871	1.027
Q9S7W4	AT3g07720/F17A17_6 OS=Arabidopsis thaliana GN=F17A17.6 PE=2 SV=1	2.192	Up	F17A17.6	61.4	35.685	229.55	38	13	13	12	19	7	12	13	10	12	13	10	325900000	714150000	358710000	0.699	1.532	0.769
Q38936	Peptidyl-prolyl cis-trans isomerase FKBP15-2 OS=Arabidopsis thaliana GN=FKBP15-2 PE=2 SV=2	1.251	Up	FKBP15-2	33.7	17.658	39.69	13	6	4	4	4	5	5	5	5	3	3	3	179580000	224560000	201110000	0.89	1.113	0.997
Q9SJZ2	Peroxidase 17 OS=Arabidopsis thaliana GN=PER17 PE=2 SV=1	1.307	Up	PER17	16.7	36.67	30.426	8	4	4	2	2	4	4	4	4	4	4	4	51200000	66862000	59827000	0.863	1.128	1.009
Q8VZ90	Putative uncharacterized protein OS=Arabidopsis thaliana GN=HBP5 PE=2 SV=1	0.607	Down	HBP5	15.3	43.159	35.06	14	5	5	7	2	5	5	4	5	5	4	5	191530000	116170000	188290000	1.158	0.703	1.139
Q9T0I8	5'-methylthioadenosine/S-adenosylhomocysteine nucleosidase 1 OS=Arabidopsis thaliana GN=MTN1 PE=1 SV=1	1.976	Up	MTN1	7.5	28.45	11.993	2	2	2	0	2	0	2	2	1	2	2	1	13706000	27079000	0	0.672	1.328
P61845	50S ribosomal protein L23, chloroplastic OS=Arabidopsis thaliana GN=rpl23-A PE=3 SV=1	0.592	Down	rpl23-A	36.6	10.789	24.77	11	3	3	5	3	3	3	2	3	3	2	3	152540000	90270000	161930000	1.131	0.669	1.2
Q9SW33	Thylakoid lumenal 17.9 kDa protein, chloroplastic OS=Arabidopsis thaliana GN=At4g24930 PE=1 SV=1	1.485	Up	At4g24930	42.2	24.695	67.443	7	6	6	3	3	1	5	5	5	5	5	5	270040000	400780000	219310000	0.91	1.351	0.739
Q9ZUJ3	AT1G60000 protein OS=Arabidopsis thaliana GN=At1g60000 PE=2 SV=1	1.9	Up	At1g60000	15.9	28.498	67.043	5	2	2	1	3	1	2	2	2	2	2	2	21161000	40211000	9419800	0.897	1.704	0.399
A0A1P8B4I4	Plastid transcriptionally active 5 OS=Arabidopsis thaliana GN=PTAC5 PE=4 SV=1	1.491	Up	PTAC5	31.7	31.986	104.47	15	7	7	3	6	6	7	7	7	7	7	7	113030000	168590000	124570000	0.835	1.245	0.92
O64816	Casein kinase II subunit alpha-4, chloroplastic OS=Arabidopsis thaliana GN=CKA4 PE=2 SV=1	1.854	Up	CKA4	15.7	50.236	33.137	7	5	3	3	2	2	5	5	4	3	3	2	57517000	106690000	54595000	0.789	1.463	0.749
Q9SZA3	Eukaryotic translation initiation factor 3 subunit K OS=Arabidopsis thaliana GN=TIF3K1 PE=2 SV=1	1.413	Up	TIF3K1	12.4	25.728	13.918	4	2	2	1	2	1	2	2	2	2	2	2	28244000	39898000	26126000	0.899	1.27	0.831
P42792	Cytochrome b OS=Arabidopsis thaliana GN=MT-CYB PE=2 SV=2	1.859	Up	MT-CYB	5.6	44.29	20.123	9	2	2	3	3	3	2	2	2	2	2	2	39974000	74306000	33946000	0.809	1.504	0.687
Q9T0A4	NAD(P)H-quinone oxidoreductase subunit S, chloroplastic OS=Arabidopsis thaliana GN=ndhS PE=1 SV=1	0.695	Down	ndhS	50.8	27.726	158.49	36	12	12	12	11	13	10	10	11	10	10	11	394950000	274560000	325590000	1.191	0.828	0.982
Q9M1H3	ABC transporter F family member 4 OS=Arabidopsis thaliana GN=ABCF4 PE=2 SV=1	2.405	Up	ABCF4	5.5	80.48	19.618	5	3	3	1	3	1	2	3	3	2	3	3	15402000	37065000	14640000	0.689	1.657	0.654
Q9M2L4	Putative calcium-transporting ATPase 11, plasma membrane-type OS=Arabidopsis thaliana GN=ACA11 PE=1 SV=1	1.414	Up	ACA11	14	111.94	59.459	9	12	6	2	5	2	11	12	10	5	6	5	34358000	48597000	38622000	0.848	1.199	0.953
P11035	Nitrate reductase [NADH] 2 OS=Arabidopsis thaliana GN=NIA2 PE=1 SV=1	1.763	Up	NIA2	14.7	102.84	86.935	19	10	10	7	9	3	10	9	9	10	9	9	92095000	162540000	98867000	0.782	1.379	0.839
Q945K7	Isocitrate dehydrogenase [NAD] catalytic subunit 5, mitochondrial OS=Arabidopsis thaliana GN=IDH5 PE=1 SV=1	1.203	Up	IDH5	36.9	40.624	197.89	39	11	6	12	14	13	11	10	11	6	5	6	1075000000	1293700000	1062300000	0.94	1.131	0.929
Q9SCY0	Phosphoglucomutase, chloroplastic OS=Arabidopsis thaliana GN=PGMP PE=1 SV=2	0.792	Down	PGMP	34	67.988	173.27	51	18	18	18	16	17	18	18	18	18	18	18	1551000000	1227700000	1565000000	1.071	0.848	1.081
Q9ZVI9	Ethanolamine-phosphate cytidylyltransferase OS=Arabidopsis thaliana GN=PECT1 PE=1 SV=1	1.229	Up	PECT1	7.4	46.977	25.181	5	3	3	1	2	2	2	2	3	2	2	3	9419000	11577000	8938900	0.944	1.16	0.896
Q9S7H1	Photosystem I reaction center subunit II-1, chloroplastic OS=Arabidopsis thaliana GN=psaD1 PE=1 SV=1	0.67	Down	psaD1	65.9	22.598	323.31	223	13	2	84	57	82	13	12	13	2	2	2	60691000000	40671000000	45730000000	1.238	0.83	0.933
Q94A65	Rhodanese-like domain-containing protein 14, chloroplastic OS=Arabidopsis thaliana GN=At4g27700 PE=2 SV=1	0.682	Down	At4g27700	52.2	24.872	143.1	30	8	8	11	9	10	8	8	6	8	8	6	710580000	485080000	639120000	1.162	0.793	1.045
Q8RWV0	Transketolase-1, chloroplastic OS=Arabidopsis thaliana GN=TKL-1 PE=1 SV=1	0.82	Down	TKL-1	71.7	79.967	323.31	316	35	35	104	104	108	35	35	35	35	35	35	38454000000	31549000000	34104000000	1.108	0.909	0.983
Q9ZW19	Tropinone reductase homolog At2g29360 OS=Arabidopsis thaliana GN=SDR PE=1 SV=1	1.318	Up	SDR	22.9	29.185	74.169	13	5	2	3	5	5	5	5	5	2	2	2	85391000	112570000	103840000	0.849	1.119	1.032
Q9ASY9	Bifunctional TENA-E protein OS=Arabidopsis thaliana GN=TENA_E PE=1 SV=3	1.484	Up	TENA_E	12.2	25.07	12.675	4	2	2	1	2	1	2	2	2	2	2	2	11069000	16413000	8515500	0.922	1.368	0.71
Q8S9J1	Protoporphyrinogen oxidase 2, chloroplastic/mitochondrial OS=Arabidopsis thaliana GN=PPOX2 PE=1 SV=1	0.83	Down	PPOX2	31.5	55.63	138.74	26	12	12	9	9	8	12	11	11	12	11	11	235330000	195470000	219900000	1.085	0.901	1.014
F4J9A0	Nodulin/glutamine synthase-like protein OS=Arabidopsis thaliana GN=NodGS PE=1 SV=1	1.418	Up	NodGS	12.3	94.384	82.183	13	9	9	2	5	6	7	9	7	7	9	7	45223000	64168000	58828000	0.807	1.144	1.049
Q9FEF8	Probable mediator of RNA polymerase II transcription subunit 36b OS=Arabidopsis thaliana GN=MED36B PE=1 SV=1	1.299	Up	MED36B	30.5	32.829	54.289	11	8	8	2	6	3	6	7	7	6	7	7	61606000	80046000	65159000	0.894	1.161	0.945
P24636	Tubulin beta-4 chain OS=Arabidopsis thaliana GN=TUBB4 PE=2 SV=2	1.644	Up	TUBB4	30.9	49.823	146.23	25	10	3	3	11	11	9	9	10	2	3	3	151940000	249990000	260000000	0.689	1.133	1.178
Q0WLB5	Clathrin heavy chain 2 OS=Arabidopsis thaliana GN=CHC2 PE=1 SV=1	1.261	Up	CHC2	23.5	193.27	311.48	72	31	4	21	26	25	28	31	31	2	4	4	488720000	615920000	676040000	0.823	1.038	1.139
F4IUQ7	Beta-galactosidase OS=Arabidopsis thaliana GN=BGAL9 PE=3 SV=1	0.825	Down	BGAL9	23.3	96.513	173.05	32	16	15	9	9	14	12	14	15	11	13	14	316070000	260580000	298010000	1.084	0.894	1.022
Q9SW43	AT4g34920/F11I11_160 OS=Arabidopsis thaliana GN=T11I11.160 PE=1 SV=1	0.808	Down	T11I11.160	32.1	36.4	69.227	24	8	8	9	8	7	8	8	8	8	8	8	430090000	347460000	373590000	1.121	0.906	0.974
Q9M9K1	Probable 2,3-bisphosphoglycerate-independent phosphoglycerate mutase 2 OS=Arabidopsis thaliana GN=At3g08590 PE=1 SV=1	1.291	Up	At3g08590	52	60.763	174.18	34	26	15	11	14	9	23	26	23	13	15	12	763110000	985530000	712130000	0.93	1.201	0.868
Q9LV09	Protein BOBBER 1 OS=Arabidopsis thaliana GN=BOB1 PE=1 SV=1	1.525	Up	BOB1	35.5	34.506	56.574	17	9	9	4	9	4	9	9	9	9	9	9	157540000	240260000	121350000	0.91	1.388	0.701
Q9C9U8	Probable calcium-binding protein CML26 OS=Arabidopsis thaliana GN=CML26 PE=1 SV=1	0.657	Down	CML26	11.7	18.002	11.273	3	2	2	2	1	0	2	2	2	2	2	2	13696000	8994900	11520000	1.201	0.789	1.01
F4IZ56	Initiation factor 4F subunit (DUF1350) OS=Arabidopsis thaliana GN=At3g43540 PE=4 SV=1	0.743	Down	At3g43540	12.3	33.35	40.231	5	2	2	2	2	1	2	2	2	2	2	2	74162000	55113000	64377000	1.149	0.854	0.997
Q9FKA5	Uncharacterized protein At5g39570 OS=Arabidopsis thaliana GN=At5g39570 PE=1 SV=1	1.915	Up	At5g39570	45.4	43.526	193.31	31	9	9	8	14	9	9	9	9	9	9	9	485480000	929320000	516130000	0.754	1.444	0.802
Q42522	Glutamate-1-semialdehyde 2,1-aminomutase 2, chloroplastic OS=Arabidopsis thaliana GN=GSA2 PE=2 SV=2	1.323	Up	GSA2	51.5	50.141	192.72	61	14	7	18	24	19	13	14	12	6	7	5	1804800000	2387000000	2635300000	0.793	1.049	1.158
Q9SV71	Cytochrome b561 and DOMON domain-containing protein At4g12980 OS=Arabidopsis thaliana GN=At4g12980 PE=2 SV=1	0.471	Down	At4g12980	8.4	42.228	21.23	10	3	3	4	2	4	3	3	3	3	3	3	83801000	39482000	74825000	1.269	0.598	1.133
Q8W1B3	At4g21445 OS=Arabidopsis thaliana GN=PRIP PE=2 SV=1	0.752	Down	PRIP	31.2	17.618	56.43	7	3	3	2	2	3	3	3	3	3	3	3	116400000	87489000	69925000	1.275	0.959	0.766
Q9M0V6	Ferredoxin--NADP reductase, root isozyme 1, chloroplastic OS=Arabidopsis thaliana GN=RFNR1 PE=2 SV=2	0.832	Down	RFNR1	44.2	42.396	89.999	26	13	6	7	10	9	11	13	11	6	6	5	262310000	218180000	238300000	1.095	0.911	0.995
O82628	V-type proton ATPase subunit G1 OS=Arabidopsis thaliana GN=VHA-G1 PE=1 SV=1	1.425	Up	VHA-G1	81.8	12.397	234.83	40	13	13	11	16	13	12	13	12	12	13	12	2197100000	3132400000	2028000000	0.896	1.277	0.827
P93836	4-hydroxyphenylpyruvate dioxygenase OS=Arabidopsis thaliana GN=HPD PE=1 SV=2	1.219	Up	HPD	13.7	48.815	29.716	9	4	4	2	4	3	4	4	3	4	4	3	19523000	23792000	27852000	0.823	1.003	1.174
P92959	50S ribosomal protein L24, chloroplastic OS=Arabidopsis thaliana GN=RPL24 PE=2 SV=2	0.681	Down	RPL24	40.9	21.976	69.363	32	7	7	11	10	11	7	7	7	7	7	7	1063700000	724200000	1044800000	1.127	0.767	1.107
P25873	50S ribosomal protein L15, chloroplastic OS=Arabidopsis thaliana GN=RPL15 PE=1 SV=2	0.799	Down	RPL15	46.2	29.707	108.26	47	14	14	15	15	17	13	13	14	13	13	14	1043300000	834570000	1087100000	1.056	0.844	1.1
P57752	Acyl-CoA-binding domain-containing protein 6 OS=Arabidopsis thaliana GN=ACBP6 PE=1 SV=1	1.79	Up	ACBP6	65.2	10.386	54.39	21	4	4	7	6	8	4	4	4	4	4	4	326960000	585360000	400890000	0.747	1.337	0.916
A0A1I9LP19	Protein-L-isoaspartate O-methyltransferase OS=Arabidopsis thaliana GN=PIMT1 PE=3 SV=1	1.398	Up	PIMT1	12.6	22.866	13.449	4	2	2	1	2	1	2	2	1	2	2	1	18921000	26436000	0	0.834	1.166
Q9C8L4	Persulfide dioxygenase ETHE1 homolog, mitochondrial OS=Arabidopsis thaliana GN=GLY3 PE=1 SV=3	1.222	Up	GLY3	57.8	32.332	131.92	34	10	10	12	10	12	10	10	9	10	10	9	552340000	674960000	591530000	0.911	1.113	0.976
Q9C9C4	Enolase 1, chloroplastic OS=Arabidopsis thaliana GN=ENO1 PE=1 SV=1	0.801	Down	ENO1	8.2	51.474	23.015	6	3	3	1	2	3	3	3	3	3	3	3	29101000	23331000	27913000	1.087	0.871	1.042
P56761	Photosystem II D2 protein OS=Arabidopsis thaliana GN=psbD PE=1 SV=3	0.803	Down	psbD	25.2	39.547	323.31	143	8	8	47	44	52	8	8	8	8	8	8	27090000000	21747000000	22309000000	1.142	0.917	0.941
O65782	Cytochrome P450 83B1 OS=Arabidopsis thaliana GN=CYP83B1 PE=1 SV=1	0.804	Down	CYP83B1	14.2	56.846	77.877	8	7	7	4	2	2	6	4	7	6	4	7	81856000	65804000	86239000	1.05	0.844	1.106
O04209	Clathrin light chain 2 OS=Arabidopsis thaliana GN=CLC2 PE=1 SV=1	1.216	Up	CLC2	36.4	28.837	93.507	21	11	11	7	6	8	10	10	11	10	10	11	298080000	362360000	293830000	0.937	1.139	0.924
Q8RY25	Nuclear pore complex protein NUP98A OS=Arabidopsis thaliana GN=NUP98A PE=1 SV=1	1.353	Up	NUP98A	6.5	106.31	41.845	7	5	5	2	4	1	4	5	2	4	5	2	28032000	37938000	17739000	1.005	1.36	0.636
Q9MAB2	At3g05070 OS=Arabidopsis thaliana GN=At3g05070 PE=1 SV=1	2.1	Up	At3g05070	25	16.396	22.137	3	2	2	1	2	0	2	2	2	2	2	2	16078000	33774000	15981000	0.733	1.539	0.728
Q6NL08	At1g29530 OS=Arabidopsis thaliana GN=At1g29530 PE=1 SV=1	0.69	Down	At1g29530	23.7	24.886	41.248	3	3	3	2	1	0	3	3	3	3	3	3	34005000	23451000	29734000	1.17	0.807	1.023
Q8LDV3	Uncharacterized protein At4g13200, chloroplastic OS=Arabidopsis thaliana GN=At4g13200 PE=2 SV=2	1.311	Up	At4g13200	11.9	20.429	17.602	3	2	2	0	1	2	2	2	2	2	2	2	9953100	13044000	12322000	0.845	1.108	1.047
O22707	Probable aldo-keto reductase 3 OS=Arabidopsis thaliana GN=At1g60690 PE=3 SV=1	0.769	Down	At1g60690	17.7	38.16	22.312	5	6	2	3	0	2	4	4	4	2	2	2	15193000	11688000	16279000	1.056	0.812	1.132
F4JXW2	Coiled-coil protein OS=Arabidopsis thaliana GN=At5g11500 PE=4 SV=1	3.376	Up	At5g11500	21	24.971	28.501	3	3	3	0	3	0	3	3	1	3	3	1	18260000	61712000	0	0.457	1.543
Q94B78	Glycine dehydrogenase (decarboxylating) 1, mitochondrial OS=Arabidopsis thaliana GN=GLDP1 PE=1 SV=2	1.475	Up	GLDP1	53.4	112.92	323.31	224	42	22	76	77	71	42	42	41	22	22	21	8332400000	12286000000	8984500000	0.844	1.245	0.911
F4IQ05	Peroxidase OS=Arabidopsis thaliana GN=At2g37130 PE=3 SV=1	0.527	Down	At2g37130	14.2	33.272	24.556	7	3	3	2	2	3	3	2	3	3	2	3	34354000	18091000	25091000	1.329	0.7	0.971
O65502	AT4g35250/F23E12_190 OS=Arabidopsis thaliana GN=HCF244 PE=1 SV=1	0.833	Down	HCF244	43.8	43.723	131.9	51	16	16	18	14	19	16	14	16	16	14	16	1121900000	934580000	1283200000	1.008	0.84	1.153
O80477	Methylesterase 3 OS=Arabidopsis thaliana GN=MES3 PE=2 SV=1	0.512	Down	MES3	22.8	29.823	40.737	13	5	5	4	5	4	5	5	5	5	5	5	237710000	121610000	217390000	1.237	0.633	1.131
Q93VR4	MLP-like protein 423 OS=Arabidopsis thaliana GN=MLP423 PE=2 SV=1	1.363	Up	MLP423	56.8	17.054	74.544	24	9	9	7	6	11	8	9	9	8	9	9	237940000	324450000	387420000	0.752	1.025	1.224
O23722	Diphosphomevalonate decarboxylase MVD1, peroxisomal OS=Arabidopsis thaliana GN=MVD1 PE=1 SV=1	1.432	Up	MVD1	11.9	45.585	22.95	6	3	3	0	2	4	3	3	3	3	3	3	25429000	36437000	28459000	0.845	1.21	0.945
Q56Y85	Methionine aminopeptidase 2B OS=Arabidopsis thaliana GN=MAP2B PE=2 SV=2	1.529	Up	MAP2B	8	49.059	53.72	4	2	2	2	2	0	2	2	2	2	2	2	23134000	35363000	23414000	0.847	1.295	0.858
A8MS49	Phototropin 2 OS=Arabidopsis thaliana GN=PHOT2 PE=1 SV=1	0.832	Down	PHOT2	24.5	100.79	269.19	38	16	13	15	9	14	16	15	14	13	12	12	495670000	411850000	506800000	1.051	0.874	1.075
Q8VZT6	Thioredoxin-like 3-2, chloroplastic OS=Arabidopsis thaliana GN=WCRKC2 PE=2 SV=1	1.51	Up	WCRKC2	19.8	21.836	22.485	4	4	4	1	1	2	3	3	4	3	3	4	35966000	54296000	34855000	0.862	1.302	0.836
F4JKR7	RAB GTPase homolog G3A OS=Arabidopsis thaliana GN=RABG3A PE=4 SV=1	0.82	Down	RABG3A	46.4	23.368	55.91	13	7	6	4	4	5	6	7	6	5	6	5	128140000	105210000	113730000	1.108	0.909	0.983
Q42523	Methylcrotonoyl-CoA carboxylase subunit alpha, mitochondrial OS=Arabidopsis thaliana GN=MCCA PE=1 SV=2	0.743	Down	MCCA	12.3	80.45	68.956	13	7	7	4	5	4	6	6	6	6	6	6	107540000	79928000	105610000	1.101	0.818	1.081
Q8L7C9	Glutathione S-transferase U20 OS=Arabidopsis thaliana GN=GSTU20 PE=1 SV=1	0.708	Down	GSTU20	42.9	25.006	94.921	30	11	10	8	10	12	11	11	11	10	10	10	2982400000	2111300000	2895900000	1.12	0.793	1.087
Q8L5Y8	Putative uncharacterized protein At5g65840 OS=Arabidopsis thaliana GN=At5g65840 PE=1 SV=1	0.417	Down	At5g65840	18.9	29.883	30.256	6	4	4	2	1	3	3	3	4	3	3	4	103470000	43190000	72429000	1.417	0.591	0.992
Q9LYL4	Potassium transporter OS=Arabidopsis thaliana GN=F18O21_250 PE=2 SV=1	0.814	Down	F18O21_250	17.3	19.922	13.497	4	2	2	1	1	2	2	2	2	2	2	2	29746000	24233000	29636000	1.067	0.869	1.063
F4HS98	Tetratricopeptide repeat (TPR)-like superfamily protein OS=Arabidopsis thaliana GN=At1g01320 PE=1 SV=1	2.066	Up	At1g01320	6.2	197.5	71.386	10	10	6	1	7	2	7	9	8	4	6	4	23670000	48934000	30064000	0.692	1.43	0.878
A0A1I9LLF2	Two-component response regulator OS=Arabidopsis thaliana GN=RR1 PE=4 SV=1	2.988	Up	RR1	4.4	67.749	14.802	3	2	2	1	2	0	2	2	2	2	2	2	4555500	13618000	5571700	0.576	1.721	0.704
Q9LQU2	Protein PLANT CADMIUM RESISTANCE 1 OS=Arabidopsis thaliana GN=PCR1 PE=1 SV=1	11.579	Up	PCR1	37.7	16.503	47.779	10	4	4	0	10	0	2	4	0	2	4	0	8564900	99352000	0	0.159	1.841
Q42553	Isopentenyl-diphosphate Delta-isomerase II, chloroplastic OS=Arabidopsis thaliana GN=IPP2 PE=1 SV=1	1.372	Up	IPP2	52.1	32.607	111.79	22	12	9	8	9	5	10	12	11	7	9	8	401380000	551040000	350960000	0.924	1.268	0.808
P93017	Dormancy-associated protein homolog 1 OS=Arabidopsis thaliana GN=DRMH1 PE=1 SV=1	0.514	Down	DRMH1	37	11.656	28.57	7	3	3	2	2	3	3	2	3	3	2	3	126330000	64869000	102780000	1.289	0.662	1.049
Q8RWC3	Aminopeptidase (DUF3754) OS=Arabidopsis thaliana GN=At3g19340 PE=2 SV=1	0.441	Down	At3g19340	10.7	56.787	29.198	8	4	4	3	2	3	4	3	3	4	3	3	37067000	16317000	36842000	1.232	0.543	1.225
Q9LX65	V-type proton ATPase subunit H OS=Arabidopsis thaliana GN=VHA-H PE=1 SV=1	0.686	Down	VHA-H	26.1	50.284	181.87	23	9	9	8	7	8	8	7	9	8	7	9	180370000	123620000	161950000	1.161	0.796	1.043
Q9MAB3	Probable nucleolar protein 5-2 OS=Arabidopsis thaliana GN=NOP5-2 PE=1 SV=1	1.349	Up	NOP5-2	5.1	59.002	14.143	6	2	2	2	2	2	2	2	2	2	2	2	12482000	16843000	13234000	0.88	1.187	0.933
Q9SR73	40S ribosomal protein S28-1 OS=Arabidopsis thaliana GN=RPS28A PE=3 SV=1	2.253	Up	RPS28A	29.7	7.3705	7.1994	4	2	1	1	2	1	2	2	2	1	1	1	100590000	226780000	90154000	0.723	1.629	0.648
O65202	Peroxisomal acyl-coenzyme A oxidase 1 OS=Arabidopsis thaliana GN=ACX1 PE=1 SV=1	1.492	Up	ACX1	34	74.301	135.92	37	17	17	11	15	11	16	15	14	16	15	14	280390000	418250000	323430000	0.823	1.228	0.949
Q9ZNT1	NADH--cytochrome b5 reductase 1 OS=Arabidopsis thaliana GN=CBR1 PE=1 SV=1	0.747	Down	CBR1	24.9	31.49	42.743	13	5	5	3	4	6	3	3	5	3	3	5	57060000	42669000	72488000	0.994	0.743	1.263
Q9XI93	At1g13930/F16A14.27 OS=Arabidopsis thaliana GN=F7A19.2 PE=1 SV=1	0.545	Down	F7A19.2	89	16.163	243.27	74	13	12	27	21	26	13	12	13	12	11	12	10262000000	5584000000	9092200000	1.234	0.672	1.094
O82491	FACT complex subunit SPT16 OS=Arabidopsis thaliana GN=SPT16 PE=1 SV=1	3.175	Up	SPT16	2.2	120.58	14.64	2	2	2	0	2	0	2	2	1	2	2	1	7017900	22260000	0	0.479	1.521
Q38820	Mitochondrial import inner membrane translocase subunit TIM23-2 OS=Arabidopsis thaliana GN=TIM23-2 PE=1 SV=1	0.808	Down	TIM23-2	18.1	19.878	24.562	5	3	3	2	2	1	3	3	2	3	3	2	20864000	16853000	15829000	1.169	0.944	0.887
Q9SL42	Peptidyl-prolyl cis-trans isomerase Pin1 OS=Arabidopsis thaliana GN=PIN1 PE=1 SV=1	1.251	Up	PIN1	64.7	13.015	50.272	17	7	7	5	7	5	7	5	5	7	5	5	153800000	192440000	97012000	1.041	1.302	0.657
Q8RWV9	Putative uncharacterized protein At5g08450 OS=Arabidopsis thaliana GN=HDC1 PE=2 SV=1	2.628	Up	HDC1	11.7	104.15	63.302	11	8	8	2	9	0	6	8	4	6	8	4	34360000	90276000	28286000	0.674	1.771	0.555
F4J5S0	Clustered mitochondria protein homolog OS=Arabidopsis thaliana GN=NOXY38 PE=3 SV=1	1.234	Up	NOXY38	2.8	152.52	24.844	4	3	3	1	1	2	3	2	3	3	2	3	22901000	28252000	21908000	0.94	1.16	0.9
P49107	Photosystem I reaction center subunit N, chloroplastic OS=Arabidopsis thaliana GN=PSAN PE=1 SV=2	0.706	Down	PSAN	36.3	18.429	204.49	70	10	10	22	21	27	10	10	9	10	10	9	12415000000	8766800000	9197100000	1.226	0.866	0.908
Q9LYN2	Ferritin-3, chloroplastic OS=Arabidopsis thaliana GN=FER3 PE=2 SV=1	2.31	Up	FER3	32.4	28.836	41.114	10	6	5	1	7	2	4	6	3	3	5	2	69648000	160980000	68335000	0.699	1.615	0.686
A0A1P8AYH5	Phospholipase-like protein (PEARLI 4) family protein OS=Arabidopsis thaliana GN=pEARLI4 PE=1 SV=1	1.307	Up	pEARLI4	3.1	80.907	15.09	6	2	2	2	3	1	2	2	2	2	2	2	33777000	44148000	30479000	0.935	1.222	0.843
A8MRX0	Flavin-containing monooxygenase FMO GS-OX5 OS=Arabidopsis thaliana GN=FMOGS-OX5 PE=2 SV=2	1.927	Up	FMOGS-OX5	8.1	52.103	19.841	4	3	3	1	2	1	3	3	3	3	3	3	17618000	33942000	13915000	0.807	1.555	0.638
Q9LW17	Expressed protein OS=Arabidopsis thaliana GN=At3g15610 PE=2 SV=1	1.257	Up	At3g15610	26.7	37.355	12.603	2	7	2	1	1	0	7	7	7	2	2	2	12740000	16019000	0	0.886	1.114
Q940S9	AT3g57890/T10K17_100 OS=Arabidopsis thaliana GN=At3g57890 PE=2 SV=1	1.53	Up	At3g57890	19.7	62.778	61.474	10	8	8	3	6	1	7	8	7	7	8	7	74188000	113510000	81088000	0.828	1.267	0.905
O64740	Protein transport protein SEC13 homolog B OS=Arabidopsis thaliana GN=SEC13B PE=1 SV=1	1.291	Up	SEC13B	10.3	32.642	18.926	4	3	3	2	1	1	2	2	3	2	2	3	18137000	23405000	24619000	0.822	1.061	1.116
O24496	Hydroxyacylglutathione hydrolase cytoplasmic OS=Arabidopsis thaliana GN=GLX2-2 PE=1 SV=2	1.283	Up	GLX2-2	34.9	28.791	133.62	29	7	7	9	11	9	6	7	6	6	7	6	302710000	388020000	373320000	0.853	1.094	1.053
Q9SF53	60S ribosomal protein L35-1 OS=Arabidopsis thaliana GN=RPL35A PE=2 SV=1	1.411	Up	RPL35A	22	14.285	26.608	9	4	1	3	4	2	4	3	4	1	1	1	109680000	154780000	110400000	0.878	1.239	0.884
Q9SKL6	At2g15220/F15A23.4 OS=Arabidopsis thaliana GN=At2g15220 PE=2 SV=1	0.566	Down	At2g15220	26.2	25.164	33.3	11	5	5	4	2	5	5	5	4	5	5	4	86628000	49055000	114880000	1.037	0.587	1.375
Q38882	Phospholipase D alpha 1 OS=Arabidopsis thaliana GN=PLDALPHA1 PE=1 SV=2	0.802	Down	PLDALPHA1	61.4	91.847	323.31	173	37	31	53	58	62	37	37	36	31	31	30	4671800000	3749000000	4224200000	1.108	0.889	1.002
Q9FL44	Proline-rich family protein OS=Arabidopsis thaliana GN=MOJ9.19 PE=2 SV=1	0.769	Down	MOJ9.19	13.2	24.395	27.234	34	3	3	13	10	11	3	3	3	3	3	3	1131800000	869840000	940930000	1.154	0.887	0.959
Q84K82	2-oxoglutarate (2OG) and Fe(II)-dependent oxygenase superfamily protein OS=Arabidopsis thaliana GN=At5g20400 PE=2 SV=1	2.194	Up	At5g20400	7.2	39.677	22.961	4	2	2	2	2	0	2	2	2	2	2	2	10500000	23046000	5407500	0.809	1.775	0.416
Q9SSR2	Signal peptidase I OS=Arabidopsis thaliana GN=At1g52600 PE=2 SV=1	1.445	Up	At1g52600	12.8	20.021	13.704	5	2	2	2	2	1	2	2	2	2	2	2	18991000	27440000	25855000	0.788	1.139	1.073
P92981	5'-adenylylsulfate reductase 2, chloroplastic OS=Arabidopsis thaliana GN=APR2 PE=1 SV=2	0.615	Down	APR2	14.1	50.655	59.787	18	5	3	5	5	8	4	4	5	2	2	3	120440000	74080000	133430000	1.102	0.678	1.221
Q8LA96	Putative RRM-containing protein OS=Arabidopsis thaliana GN=At4g17720 PE=1 SV=1	1.886	Up	At4g17720	12.8	33.547	38.518	11	5	3	3	5	3	5	5	5	3	3	3	143910000	271280000	172730000	0.734	1.384	0.881
Q9C901	DNA-binding enhancer protein-like protein OS=Arabidopsis thaliana GN=At3g06610 PE=1 SV=1	5.456	Up	At3g06610	25.2	12.795	22.055	10	2	2	3	3	4	2	2	2	2	2	2	20620000	112470000	14501000	0.419	2.286	0.295
Q9SKU1	Clathrin light chain 1 OS=Arabidopsis thaliana GN=At2g20760 PE=2 SV=1	1.353	Up	At2g20760	27.8	37.225	93.8	24	10	9	7	10	7	9	10	9	8	9	8	221120000	299030000	239350000	0.873	1.181	0.945
P10796	Ribulose bisphosphate carboxylase small chain 1B, chloroplastic OS=Arabidopsis thaliana GN=RBCS-1B PE=1 SV=1	0.749	Down	RBCS-1B	64.6	20.286	323.31	63	16	5	22	20	21	16	16	16	5	5	5	21168000000	15849000000	14094000000	1.242	0.93	0.827
Q0WWE3	Cytochrome b-c1 complex subunit 6 OS=Arabidopsis thaliana GN=At1g15120 PE=1 SV=1	2.058	Up	At1g15120	55.1	7.9832	56.695	15	4	4	5	6	4	4	4	3	4	4	3	137040000	282120000	173370000	0.694	1.428	0.878
P28493	Pathogenesis-related protein 5 OS=Arabidopsis thaliana GN=At1g75040 PE=1 SV=1	7.162	Up	At1g75040	55.6	25.252	155.81	66	10	10	16	33	17	9	10	9	9	10	9	2003300000	14343000000	1377400000	0.339	2.428	0.233
Q9LZV4	Serine/threonine-protein kinase STN8, chloroplastic OS=Arabidopsis thaliana GN=STN8 PE=2 SV=1	0.83	Down	STN8	9.7	54.978	29.283	7	5	5	2	3	2	5	5	5	5	5	5	59040000	49002000	74371000	0.971	0.806	1.223
Q9SCW1	Beta-galactosidase 1 OS=Arabidopsis thaliana GN=BGAL1 PE=2 SV=1	1.406	Up	BGAL1	22.2	93.658	135.06	34	12	12	11	11	12	11	11	12	11	11	12	216030000	303730000	306840000	0.784	1.102	1.114
Q9LZ08	Protein MODIFIER OF SNC1 11 OS=Arabidopsis thaliana GN=MOS11 PE=1 SV=1	1.243	Up	MOS11	18.7	22.779	26.867	7	3	3	2	3	2	2	3	2	2	3	2	43098000	53577000	55080000	0.852	1.059	1.089
P56780	Photosystem II reaction center protein H OS=Arabidopsis thaliana GN=psbH PE=1 SV=2	0.766	Down	psbH	28.8	7.7018	16.905	17	2	2	6	5	6	2	2	2	2	2	2	8539100000	6547900000	6754900000	1.173	0.899	0.928
P56755	NAD(P)H-quinone oxidoreductase subunit I, chloroplastic OS=Arabidopsis thaliana GN=ndhI PE=3 SV=1	0.715	Down	ndhI	37.8	20.086	39.715	12	6	6	4	2	6	5	5	6	5	5	6	181600000	129970000	177600000	1.114	0.797	1.089
Q6R3K6	Probable metal-nicotianamine transporter YSL6 OS=Arabidopsis thaliana GN=YSL6 PE=2 SV=2	0.588	Down	YSL6	7.5	73.573	27.582	6	3	3	2	2	2	3	3	2	3	3	2	48691000	28616000	57940000	1.08	0.635	1.285
Q84VZ5	Uncharacterized GPI-anchored protein At5g19240 OS=Arabidopsis thaliana GN=At5g19240 PE=2 SV=2	2.325	Up	At5g19240	18.6	21.335	26.991	6	3	3	2	2	2	3	3	3	3	3	3	205280000	477010000	213960000	0.687	1.597	0.716
O80840	Phosphomannomutase OS=Arabidopsis thaliana GN=PMM PE=1 SV=1	1.474	Up	PMM	55.7	27.761	146.02	46	14	14	15	17	14	12	14	13	12	14	13	516020000	760720000	576430000	0.835	1.231	0.933
O65581	Fructose-bisphosphate aldolase 5, cytosolic OS=Arabidopsis thaliana GN=FBA5 PE=1 SV=1	0.688	Down	FBA5	50.6	38.293	172.56	40	14	11	14	15	11	11	10	13	10	8	10	2225300000	1530600000	1843900000	1.192	0.82	0.988
A0A1P8ARZ3	FAM91 carboxy-terminus protein OS=Arabidopsis thaliana GN=At1g35220 PE=1 SV=1	0.34	Down	At1g35220	1.6	99.813	10.866	5	2	2	2	1	2	2	2	2	2	2	2	921120000	313360000	626110000	1.485	0.505	1.01
O65719	Heat shock 70 kDa protein 3 OS=Arabidopsis thaliana GN=HSP70-3 PE=1 SV=1	1.246	Up	HSP70-3	63.6	71.147	268.79	69	39	14	22	25	22	38	37	36	14	14	14	1707500000	2128200000	1442100000	0.971	1.21	0.82
Q8GXB1	UPF0548 protein At2g17695 OS=Arabidopsis thaliana GN=At2g17695 PE=2 SV=1	0.696	Down	At2g17695	22.9	23.245	104.4	15	4	4	7	5	3	4	4	4	4	4	4	323440000	225140000	303420000	1.139	0.793	1.068
O22467	Histone-binding protein MSI1 OS=Arabidopsis thaliana GN=MSI1 PE=1 SV=1	4.2	Up	MSI1	8.7	48.194	25.008	5	3	3	0	5	0	2	3	1	2	3	1	9797500	41113000	12379000	0.464	1.949	0.587
Q2V4Q4	AT1G07320 protein OS=Arabidopsis thaliana GN=RPL4 PE=2 SV=1	1.855	Up	RPL4	25.2	30.142	55.294	21	7	7	4	9	8	6	7	7	6	7	7	139840000	259540000	232380000	0.664	1.232	1.103
Q0WV25	Tubulin alpha-4 chain OS=Arabidopsis thaliana GN=TUBA4 PE=2 SV=2	2.164	Up	TUBA4	30.7	49.54	128.89	30	12	4	7	13	10	9	12	10	3	4	3	231760000	501380000	407860000	0.609	1.318	1.072
O22827	Molybdopterin synthase catalytic subunit OS=Arabidopsis thaliana GN=MOCS2 PE=2 SV=1	1.657	Up	MOCS2	16.7	22.216	32.74	7	4	4	1	5	1	4	4	2	4	4	2	26898000	44579000	32136000	0.779	1.291	0.93
O82384	FAD/NAD(P)-binding oxidoreductase family protein OS=Arabidopsis thaliana GN=CTF2B PE=2 SV=2	2.294	Up	CTF2B	14.1	46.884	34.063	9	5	3	2	5	2	2	5	2	1	3	1	31010000	71153000	43444000	0.639	1.466	0.895
P54970	IAA-amino acid hydrolase ILR1-like 2 OS=Arabidopsis thaliana GN=ILL2 PE=1 SV=2	1.5	Up	ILL2	8.2	47.855	22.524	2	3	3	0	2	0	3	3	2	3	3	2	43013000	64485000	0	0.8	1.2
Q9FFJ2	Putative uncharacterized protein OS=Arabidopsis thaliana GN=ENH1 PE=2 SV=1	0.751	Down	ENH1	41.7	28.458	97.879	32	8	8	8	10	14	8	8	8	8	8	8	1084800000	814980000	1315500000	1.012	0.76	1.227
O23365	Cytochrome P450 97B3, chloroplastic OS=Arabidopsis thaliana GN=CYP97B3 PE=1 SV=2	0.606	Down	CYP97B3	15.2	65.174	61.839	16	8	8	5	4	7	7	7	8	7	7	8	133680000	80936000	106620000	1.248	0.756	0.996
F4J7I2	Ubiquitin-specific protease 13 OS=Arabidopsis thaliana GN=UBP13 PE=3 SV=1	1.442	Up	UBP13	25.9	130.52	63.102	14	25	9	3	8	3	20	24	21	7	9	7	54628000	78764000	63572000	0.832	1.2	0.968
Q9LY15	Peptide methionine sulfoxide reductase A2 OS=Arabidopsis thaliana GN=MRSA2 PE=1 SV=1	0.651	Down	MRSA2	36.2	24.434	42.988	11	6	5	4	4	3	6	6	6	5	5	5	257770000	167570000	214640000	1.208	0.786	1.006
Q9ZVC6	At2g27140 OS=Arabidopsis thaliana GN=At2g27140 PE=2 SV=1	0.536	Down	At2g27140	9.8	25.117	13.722	5	2	2	2	1	2	2	2	2	2	2	2	34538000	18534000	34309000	1.186	0.636	1.178
Q9LS94	Ras-related protein RABG3f OS=Arabidopsis thaliana GN=RABG3F PE=1 SV=1	1.446	Up	RABG3F	37.9	23.102	16.783	4	8	1	2	1	1	8	8	8	1	1	1	198780000	287320000	226380000	0.837	1.21	0.953
Q9ZVA1	EP1-like glycoprotein 1 OS=Arabidopsis thaliana GN=At1g78820 PE=2 SV=1	1.483	Up	At1g78820	31	50.594	147.63	23	10	6	6	8	9	9	10	9	5	6	5	228840000	339390000	286620000	0.803	1.191	1.006
P93026	Vacuolar-sorting receptor 1 OS=Arabidopsis thaliana GN=VSR1 PE=1 SV=2	1.348	Up	VSR1	8.7	68.991	24.439	5	4	3	1	3	1	4	3	3	3	3	2	14144000	19070000	17853000	0.831	1.12	1.049
P25856	Glyceraldehyde-3-phosphate dehydrogenase GAPA1, chloroplastic OS=Arabidopsis thaliana GN=GAPA1 PE=1 SV=3	0.802	Down	GAPA1	62.9	42.489	251.41	41	20	8	12	14	15	19	19	20	7	7	8	6134200000	4917300000	5948800000	1.082	0.868	1.05
Q9LSC4	AT3G27110 protein OS=Arabidopsis thaliana GN=At3g27110 PE=2 SV=1	1.342	Up	At3g27110	6.7	37.948	14.058	6	2	2	2	3	1	2	2	2	2	2	2	16567000	22230000	17238000	0.887	1.19	0.923
Q6NQA8	Probable apyrase 5 OS=Arabidopsis thaliana GN=APY5 PE=2 SV=1	1.556	Up	APY5	14.1	53.504	84.928	13	5	5	2	4	7	5	5	5	5	5	5	133660000	208140000	303240000	0.622	0.968	1.41
P43255	COP9 signalosome complex subunit 8 OS=Arabidopsis thaliana GN=CSN8 PE=1 SV=1	1.621	Up	CSN8	16.2	22.546	18.261	3	3	3	1	1	1	3	3	2	3	3	2	13181000	21370000	14446000	0.807	1.308	0.885
Q9SJ62	Protein WVD2-like 4 OS=Arabidopsis thaliana GN=WDL4 PE=1 SV=2	1.444	Up	WDL4	20.1	46.696	67.37	13	8	8	4	5	4	5	7	5	5	7	5	67302000	97128000	101530000	0.759	1.096	1.145
Q9C666	Acyl-CoA N-acyltransferases (NAT) superfamily protein OS=Arabidopsis thaliana GN=At1g26220 PE=2 SV=1	1.408	Up	At1g26220	22.8	21.851	22.525	7	3	3	2	3	2	3	3	3	3	3	3	78190000	110030000	71746000	0.902	1.27	0.828
P42760	Glutathione S-transferase F6 OS=Arabidopsis thaliana GN=GSTF6 PE=2 SV=2	4.751	Up	GSTF6	88	23.486	323.31	87	19	9	26	42	19	16	19	16	8	9	8	3020300000	14357000000	2118800000	0.465	2.209	0.326
Q9SCX8	Purple acid phosphatase 17 OS=Arabidopsis thaliana GN=PAP17 PE=2 SV=1	1.658	Up	PAP17	18	38.297	34.075	10	5	5	2	5	3	5	5	4	5	5	4	32973000	54709000	28202000	0.854	1.416	0.73
F4IFM7	Synaptotagmin A OS=Arabidopsis thaliana GN=SYTA PE=4 SV=1	0.719	Down	SYTA	30.1	64.49	145.18	36	14	14	14	6	16	14	11	14	14	11	14	302310000	217500000	356650000	1.035	0.744	1.221
Q8LCU7	Enoyl-[acyl-carrier-protein] reductase, mitochondrial OS=Arabidopsis thaliana GN=At3g45770 PE=1 SV=1	0.725	Down	At3g45770	13.3	40.823	76.486	10	4	4	4	3	3	4	4	4	4	4	4	99182000	71879000	85853000	1.158	0.839	1.003
Q9FJH6	ABC transporter F family member 1 OS=Arabidopsis thaliana GN=ABCF1 PE=2 SV=1	1.824	Up	ABCF1	12.6	66.885	64.493	18	8	8	4	9	5	7	8	6	7	8	6	41036000	74914000	54437000	0.723	1.319	0.958
P55228	Glucose-1-phosphate adenylyltransferase small subunit, chloroplastic OS=Arabidopsis thaliana GN=APS1 PE=2 SV=2	0.747	Down	APS1	48.8	56.65	323.31	86	21	21	32	30	24	21	20	19	21	20	19	4467300000	3336600000	3791600000	1.156	0.863	0.981
Q9LIN5	Eukaryotic translation initiation factor 4B1 OS=Arabidopsis thaliana GN=EIF4B1 PE=1 SV=1	1.283	Up	EIF4B1	37.8	57.719	112.66	26	20	16	11	10	5	18	20	17	14	16	13	213790000	274430000	221950000	0.903	1.159	0.938
P37702	Myrosinase 1 OS=Arabidopsis thaliana GN=TGG1 PE=1 SV=1	0.697	Down	TGG1	46.2	61.132	323.31	135	23	22	44	40	51	19	20	23	18	19	22	10856000000	7559000000	13048000000	1.035	0.721	1.244
Q8GXY9	At5g38980 OS=Arabidopsis thaliana GN=At5g38980 PE=2 SV=1	0.783	Down	At5g38980	34.8	10.35	37.022	3	2	2	2	0	1	2	2	2	2	2	2	257960000	201800000	250380000	1.09	0.853	1.058
Q9ZU38	Probable ribose-5-phosphate isomerase 2 OS=Arabidopsis thaliana GN=RPI2 PE=1 SV=1	0.726	Down	RPI2	9.8	28.516	13.631	4	2	2	1	1	2	2	2	2	2	2	2	19066000	13834000	14751000	1.2	0.871	0.929
P34790	Peptidyl-prolyl cis-trans isomerase CYP18-3 OS=Arabidopsis thaliana GN=CYP18-3 PE=1 SV=1	0.559	Down	CYP18-3	55.8	18.373	87.697	38	9	4	15	10	13	9	9	9	4	4	4	1537400000	859410000	1736800000	1.116	0.624	1.26
Q9C9B9	At1g73980/F2P9_15 OS=Arabidopsis thaliana GN=AtTTM1 PE=1 SV=1	1.522	Up	AtTTM1	4.5	72.407	16.869	4	3	3	1	1	2	3	3	3	3	3	3	7575200	11534000	0	0.793	1.207
Q9LFE4	WEB family protein At5g16730, chloroplastic OS=Arabidopsis thaliana GN=At5g16730 PE=1 SV=1	1.21	Up	At5g16730	4.8	96.207	21.365	4	3	3	0	3	1	3	3	3	3	3	3	14508000	17563000	17641000	0.876	1.06	1.065
Q6AWU6	Probable thiol methyltransferase 2 OS=Arabidopsis thaliana GN=HOL3 PE=1 SV=1	1.603	Up	HOL3	20.4	25.042	22.331	6	3	3	2	2	2	3	3	3	3	3	3	41722000	66877000	39692000	0.844	1.353	0.803
Q9LFE0	SART-1 family protein DOT2 OS=Arabidopsis thaliana GN=DOT2 PE=1 SV=1	2.214	Up	DOT2	6.5	94.141	29.419	6	4	4	1	4	1	3	4	4	3	4	4	28691000	63516000	24940000	0.735	1.627	0.639
Q9SR59	Monodehydroascorbate reductase 3 OS=Arabidopsis thaliana GN=MDAR3 PE=2 SV=1	9.955	Up	MDAR3	31.1	48.362	120.42	16	9	9	2	12	2	4	9	2	4	9	2	48394000	482410000	65100000	0.244	2.429	0.328
Q9SGE0	UDP-D-apiose/UDP-D-xylose synthase 2 OS=Arabidopsis thaliana GN=AXS2 PE=2 SV=1	0.778	Down	AXS2	41.4	43.79	44.543	16	14	4	4	5	7	14	14	14	4	4	4	93077000	72439000	122650000	0.969	0.754	1.277
F4KJA1	Monofunctional riboflavin biosynthesis protein RIBA 3 OS=Arabidopsis thaliana GN=RIBA3 PE=3 SV=1	1.463	Up	RIBA3	10.1	60.176	31.075	6	5	4	2	4	0	5	5	5	4	4	4	41709000	61027000	42271000	0.863	1.263	0.875
P57106	Malate dehydrogenase 2, cytoplasmic OS=Arabidopsis thaliana GN=MDH2 PE=1 SV=1	1.279	Up	MDH2	35.5	35.675	21.977	8	10	2	3	3	2	10	10	10	2	2	2	44138000	56496000	47990000	0.891	1.14	0.969
P52839	Cytosolic sulfotransferase 12 OS=Arabidopsis thaliana GN=SOT12 PE=1 SV=2	1.755	Up	SOT12	25.8	37.139	53.279	7	7	7	0	5	2	3	6	4	3	6	4	28583000	50142000	31858000	0.775	1.36	0.864
O04147	Cyclic phosphodiesterase OS=Arabidopsis thaliana GN=At4g18930 PE=1 SV=1	1.23	Up	At4g18930	21.5	20.514	37.007	8	4	4	4	3	1	4	4	4	4	4	4	103720000	127680000	111760000	0.907	1.116	0.977
O64745	Berberine bridge enzyme-like 16 OS=Arabidopsis thaliana GN=At2g34810 PE=2 SV=1	0.442	Down	At2g34810	20.4	61.306	69.17	17	10	10	7	1	9	9	9	10	9	9	10	120650000	53401000	232180000	0.891	0.394	1.715
P56796	50S ribosomal protein L33, chloroplastic OS=Arabidopsis thaliana GN=rpl33 PE=3 SV=1	0.821	Down	rpl33	25.8	7.692	18.94	5	3	3	0	2	3	2	2	3	2	2	3	66636000	54742000	69730000	1.046	0.859	1.095
Q9SJT7	V-type proton ATPase subunit a2 OS=Arabidopsis thaliana GN=VHA-a2 PE=1 SV=1	0.758	Down	VHA-a2	20.2	93.105	70.686	14	13	6	5	3	6	12	13	13	6	6	6	95782000	72619000	97182000	1.082	0.82	1.098
A0A1P8BFI1	UDP-glucuronic acid decarboxylase 3 OS=Arabidopsis thaliana GN=UXS3 PE=4 SV=1	1.283	Up	UXS3	52.1	35.429	110.62	28	13	3	5	12	11	11	12	12	3	2	3	374950000	481210000	482450000	0.84	1.078	1.081
P24100	Cyclin-dependent kinase A-1 OS=Arabidopsis thaliana GN=CDKA-1 PE=1 SV=1	1.427	Up	CDKA-1	14.3	34.03	32.161	10	5	4	3	4	3	5	5	4	4	4	3	36960000	52734000	43214000	0.834	1.19	0.975
Q56WH1	Tubulin alpha-3 chain OS=Arabidopsis thaliana GN=TUBA3 PE=1 SV=2	1.858	Up	TUBA3	26.9	49.654	21.826	8	11	3	2	3	3	9	10	9	3	2	2	41373000	76864000	66949000	0.67	1.245	1.085
Q8VYM4	Putative uncharacterized protein At3g52150 OS=Arabidopsis thaliana GN=PSRP2 PE=2 SV=1	1.394	Up	PSRP2	34	27.748	95.392	28	7	7	10	10	8	7	7	6	7	7	6	2167300000	3021100000	2254100000	0.874	1.218	0.909
Q9XI01	Protein disulfide isomerase-like 1-1 OS=Arabidopsis thaliana GN=PDIL1-1 PE=1 SV=1	1.46	Up	PDIL1-1	60.3	55.601	317.93	129	31	26	42	48	39	31	31	31	26	26	26	2897400000	4230600000	2696600000	0.885	1.292	0.823
Q9XI73	Photosynthetic NDH subunit of lumenal location 2, chloroplastic OS=Arabidopsis thaliana GN=PNSL2 PE=1 SV=1	0.606	Down	PNSL2	25.8	22.157	32.965	16	5	5	5	5	6	5	5	5	5	5	5	338170000	205150000	340770000	1.148	0.696	1.156
Q96262	Plasma membrane-associated cation-binding protein 1 OS=Arabidopsis thaliana GN=PCAP1 PE=1 SV=1	0.819	Down	PCAP1	74.2	24.584	323.31	129	25	25	46	45	38	25	24	23	25	24	23	14753000000	12077000000	15117000000	1.055	0.864	1.081
Q9S714	Photosystem I reaction center subunit IV B, chloroplastic OS=Arabidopsis thaliana GN=PSAE2 PE=2 SV=1	0.555	Down	PSAE2	53.8	15.189	137.04	20	6	3	5	4	11	5	6	6	2	3	3	3310400000	1835200000	2336200000	1.327	0.736	0.937
Q9SVC2	Syntaxin-122 OS=Arabidopsis thaliana GN=SYP122 PE=1 SV=1	3.245	Up	SYP122	15.5	37.836	55.154	5	5	5	0	4	1	3	5	3	3	5	3	31124000	100950000	23739000	0.599	1.944	0.457
Q8S8R1	Expressed protein OS=Arabidopsis thaliana GN=At2g23120 PE=2 SV=1	1.79	Up	At2g23120	89.2	8.4821	65.86	8	3	3	2	5	1	3	3	3	3	3	3	98291000	176020000	54925000	0.896	1.604	0.5
Q9LKR8	Rubisco accumulation factor 1.1, chloroplastic OS=Arabidopsis thaliana GN=RAF1.1 PE=1 SV=1	1.511	Up	RAF1.1	25.3	48.236	114.45	18	7	7	3	8	7	7	7	7	7	7	7	177090000	267540000	293220000	0.72	1.088	1.192
A0A1I9LM56	Beta-galactosidase OS=Arabidopsis thaliana GN=BGAL2 PE=3 SV=1	0.685	Down	BGAL2	11.7	88.405	64.814	10	8	5	4	1	5	8	6	7	5	3	4	140650000	96287000	164950000	1.05	0.719	1.231
O22941	Insulin-degrading enzyme-like 1, peroxisomal OS=Arabidopsis thaliana GN=PXM16 PE=2 SV=1	1.992	Up	PXM16	15.8	110.99	74.813	18	12	12	3	11	4	8	12	9	8	12	9	59947000	119430000	68822000	0.725	1.444	0.832
Q9AT00	Protein TRIGALACTOSYLDIACYLGLYCEROL 3, chloroplastic OS=Arabidopsis thaliana GN=TGD3 PE=1 SV=1	1.297	Up	TGD3	15.9	37.518	24.828	3	4	4	0	3	0	4	4	3	4	4	3	24751000	32088000	17850000	0.994	1.289	0.717
Q29Q34	At5g19440 OS=Arabidopsis thaliana GN=At5g19440 PE=2 SV=1	1.395	Up	At5g19440	23.9	35.593	67.244	16	8	8	6	8	2	8	8	8	8	8	8	154420000	215420000	134440000	0.919	1.282	0.8
Q9LXT3	Multiprotein-bridging factor 1b OS=Arabidopsis thaliana GN=MBF1B PE=2 SV=1	2.421	Up	MBF1B	59.2	15.582	19.862	3	6	2	1	2	0	5	6	5	2	2	2	14727000	35657000	14878000	0.677	1.639	0.684
O65378	1-aminocyclopropane-1-carboxylate oxidase 3 OS=Arabidopsis thaliana GN=At1g12010 PE=2 SV=1	1.247	Up	At1g12010	7.5	36.531	119.36	12	3	2	4	4	4	3	3	3	2	2	2	280400000	349590000	231060000	0.977	1.218	0.805
A0A1P8B6G3	Proteasome component (PCI) domain protein OS=Arabidopsis thaliana GN=At4g19006 PE=1 SV=1	2.236	Up	At4g19006	10	50.187	12.387	2	4	2	1	1	0	4	4	3	2	2	1	19336000	43229000	0	0.618	1.382
O22867	Defensin-like protein 194 OS=Arabidopsis thaliana GN=ATTI3 PE=3 SV=2	0.781	Down	ATTI3	25.3	9.4081	14.43	9	2	2	3	3	3	2	2	2	2	2	2	179510000	140140000	182780000	1.072	0.837	1.091
Q8LEU3	Chlorophyll(ide) b reductase NOL, chloroplastic OS=Arabidopsis thaliana GN=NOL PE=1 SV=1	0.788	Down	NOL	19.3	38.149	42.308	13	5	5	5	2	6	4	4	5	4	4	5	113150000	89106000	91898000	1.154	0.909	0.937
Q03250	Glycine-rich RNA-binding protein 7 OS=Arabidopsis thaliana GN=RBG7 PE=1 SV=1	1.231	Up	RBG7	72.7	16.89	111.46	66	11	9	21	22	23	10	10	10	8	8	8	4860900000	5986600000	4420600000	0.955	1.176	0.869
Q39119	Vacuolar-processing enzyme gamma-isozyme OS=Arabidopsis thaliana GN=At4g32940 PE=2 SV=2	0.672	Down	At4g32940	9.9	54.335	40.713	10	4	4	5	1	4	3	3	4	3	3	4	312070000	209760000	298160000	1.142	0.767	1.091
Q9FLI7	CDGSH iron-sulfur domain-containing protein NEET OS=Arabidopsis thaliana GN=NEET PE=1 SV=1	0.786	Down	NEET	34.3	11.626	24.692	8	3	3	3	3	2	3	3	3	3	3	3	103430000	81291000	146690000	0.936	0.736	1.328
F4JEJ0	Glycosyl hydrolases family 32 protein OS=Arabidopsis thaliana GN=ATBFRUCT1 PE=3 SV=1	1.588	Up	ATBFRUCT1	12.9	65.953	42.697	7	5	5	1	5	1	2	5	3	2	5	3	43161000	68535000	39061000	0.859	1.364	0.777
F4IUA0	DUF2996 family protein OS=Arabidopsis thaliana GN=At2g04039 PE=4 SV=1	0.728	Down	At2g04039	55.2	18.335	270.51	37	7	7	13	13	11	7	7	7	7	7	7	1419800000	1033700000	1211900000	1.162	0.846	0.992
Q9LD47	Copper chaperone for superoxide dismutase, chloroplastic/cytosolic OS=Arabidopsis thaliana GN=CCS PE=1 SV=1	1.771	Up	CCS	7.2	33.851	15.829	4	2	2	1	2	1	2	2	2	2	2	2	17417000	30842000	14386000	0.834	1.477	0.689
Q9XIP8	Protein CDI OS=Arabidopsis thaliana GN=CDI PE=2 SV=1	2.358	Up	CDI	17	30.216	20.537	6	3	3	1	4	1	3	3	3	3	3	3	31170000	73433000	34044000	0.674	1.589	0.737
P23321	Oxygen-evolving enhancer protein 1-1, chloroplastic OS=Arabidopsis thaliana GN=PSBO1 PE=1 SV=2	0.709	Down	PSBO1	54.8	35.142	274.21	149	21	8	57	41	51	21	21	21	8	8	8	56044000000	39727000000	43089000000	1.211	0.858	0.931
Q93ZC2	ARM repeat superfamily protein OS=Arabidopsis thaliana GN=At5g36230 PE=2 SV=1	1.693	Up	At5g36230	8.3	47.215	56.76	6	3	3	2	3	1	2	3	3	2	3	3	16302000	27594000	16412000	0.811	1.373	0.816
O04904	Dihydroorotase, mitochondrial OS=Arabidopsis thaliana GN=PYR4 PE=1 SV=1	0.75	Down	PYR4	37.4	41.949	107.73	23	10	10	7	7	9	9	10	9	9	10	9	207580000	155770000	206890000	1.092	0.819	1.088
O04551	Plant/protein OS=Arabidopsis thaliana GN=At1g27020 PE=2 SV=1	0.72	Down	At1g27020	11.7	35.079	17.526	3	3	3	2	1	0	3	2	2	3	2	2	33473000	24110000	0	1.163	0.837
F4K9L9	Serine/threonine protein kinase 3 OS=Arabidopsis thaliana GN=PK3 PE=4 SV=1	1.74	Up	PK3	6.8	35.046	13.781	3	2	2	0	2	1	2	2	1	2	2	1	5848500	10176000	0	0.73	1.27
Q9SZP6	AT4g38690/F20M13_250 OS=Arabidopsis thaliana GN=F20M13.250 PE=2 SV=1	0.604	Down	F20M13.250	24.5	36.289	51.992	13	6	6	3	4	6	6	5	6	6	5	6	201070000	121460000	297610000	0.973	0.588	1.44
Q94A52	Eukaryotic initiation factor 4A-III homolog OS=Arabidopsis thaliana GN=EIF4A3 PE=1 SV=2	1.568	Up	EIF4A3	30.9	45.844	79.423	17	13	11	3	8	6	11	12	12	9	10	10	108950000	170760000	121920000	0.814	1.276	0.911
Q94JS0	Cytochrome b-c1 complex subunit Rieske, mitochondrial OS=Arabidopsis thaliana GN=At5g13430 PE=2 SV=1	0.753	Down	At5g13430	21	29.607	178.44	24	5	5	8	6	10	5	5	5	5	5	5	637150000	479440000	406210000	1.255	0.945	0.8
Q94II3	Probable methyltransferase PMT21 OS=Arabidopsis thaliana GN=ERD3 PE=2 SV=1	1.622	Up	ERD3	3.3	68.33	10.891	2	2	2	0	0	2	2	2	2	2	2	2	7100500	11511000	19224000	0.563	0.913	1.524
A0A1P8B8V4	ENTH/VHS/GAT family protein OS=Arabidopsis thaliana GN=At4g32760 PE=4 SV=1	1.312	Up	At4g32760	15.8	53.994	44.36	5	4	4	1	3	1	3	4	3	3	4	3	61783000	81127000	60331000	0.912	1.197	0.891
F4JY76	Eukaryotic translation initiation factor 3 subunit L OS=Arabidopsis thaliana GN=At5g25754 PE=1 SV=1	1.523	Up	At5g25754	9.9	60.182	39.31	6	4	4	1	3	2	3	4	3	3	4	3	12032000	18337000	15937000	0.78	1.188	1.033
Q9SGH4	Photosynthetic NDH subunit of lumenal location 3, chloroplastic OS=Arabidopsis thaliana GN=PNSL3 PE=1 SV=1	0.611	Down	PNSL3	34.1	24.781	160.75	29	7	7	12	7	10	7	7	7	7	7	7	601330000	367620000	556590000	1.183	0.723	1.095
Q8VZK2	Translation machinery-associated protein 22 OS=Arabidopsis thaliana GN=At5g11900 PE=2 SV=1	1.94	Up	At5g11900	13.6	21.591	17.952	8	3	3	2	4	2	3	3	3	3	3	3	23117000	44822000	26501000	0.734	1.424	0.842
Q9SMM7	HXXXD-type acyl-transferase family protein OS=Arabidopsis thaliana GN=T8P19.230 PE=2 SV=1	1.298	Up	T8P19.230	9.5	48.004	25.187	6	4	4	1	1	4	2	3	4	2	3	4	27129000	35218000	29129000	0.89	1.155	0.955
Q9FMD7	Probable inactive receptor kinase At5g16590 OS=Arabidopsis thaliana GN=At5g16590 PE=1 SV=1	1.599	Up	At5g16590	8	67.463	24.902	6	5	4	1	3	2	3	5	3	2	4	2	29181000	46664000	34355000	0.794	1.27	0.935
Q42564	L-ascorbate peroxidase 3 OS=Arabidopsis thaliana GN=APX3 PE=1 SV=1	1.217	Up	APX3	53.3	31.571	237.67	55	18	16	17	22	16	18	17	17	16	15	15	1159800000	1411700000	1106600000	0.946	1.151	0.903
Q9SSS9	ATP synthase subunit delta, chloroplastic OS=Arabidopsis thaliana GN=ATPD PE=1 SV=1	0.762	Down	ATPD	61.5	25.668	323.31	53	14	14	17	19	17	13	14	14	13	14	14	5547000000	4229000000	5091500000	1.119	0.853	1.027
Q2V3E2	Protein yippee-like At4g27740 OS=Arabidopsis thaliana GN=At4g27740 PE=3 SV=1	1.525	Up	At4g27740	21.9	11.781	26.177	5	2	2	2	3	0	2	2	2	2	2	2	28199000	43019000	25379000	0.876	1.336	0.788
Q9LV03	Glutamate synthase 1 [NADH], chloroplastic OS=Arabidopsis thaliana GN=GLT1 PE=1 SV=2	1.281	Up	GLT1	8.2	241.9	103.25	20	14	14	4	7	9	13	11	12	13	11	12	79211000	101480000	107060000	0.826	1.058	1.116
Q9C5H4	VHS domain-containing protein At3g16270 OS=Arabidopsis thaliana GN=At3g16270 PE=1 SV=1	1.405	Up	At3g16270	7.8	74.891	26.115	5	4	4	2	2	1	3	4	3	3	4	3	24171000	33953000	22975000	0.894	1.256	0.85
Q9SA73	Obg-like ATPase 1 OS=Arabidopsis thaliana GN=YchF1 PE=1 SV=1	1.294	Up	YchF1	68.5	44.471	223.64	71	23	23	25	28	18	20	22	21	20	22	21	1393100000	1802400000	1406600000	0.908	1.175	0.917
Q9ZSA8	Protein DMR6-LIKE OXYGENASE 1 OS=Arabidopsis thaliana GN=DLO1 PE=1 SV=1	5.27	Up	DLO1	11.5	39.234	37.116	4	4	4	0	4	0	2	4	0	2	4	0	11339000	59738000	0	0.319	1.681
Q8VZ87	Chlorophyll a-b binding protein 3, chloroplastic OS=Arabidopsis thaliana GN=LHCB1.2 PE=1 SV=2	0.499	Down	LHCB1.2	61	28.227	66.79	23	11	2	9	6	8	9	11	10	1	2	2	6120900000	3056000000	1458000000	1.727	0.862	0.411
Q9SEU8	Thioredoxin M2, chloroplastic OS=Arabidopsis thaliana GN=At4g03520 PE=1 SV=2	1.211	Up	At4g03520	47.3	20.312	99.147	45	9	9	13	18	14	8	9	9	8	9	9	3200200000	3874100000	3307200000	0.925	1.12	0.956
Q9FLT0	Ribonuclease TUDOR 2 OS=Arabidopsis thaliana GN=TSN2 PE=1 SV=1	1.294	Up	TSN2	28.1	107.74	234.02	62	26	16	18	23	21	26	24	24	16	14	15	807300000	1044400000	878610000	0.887	1.148	0.965
Q9LS48	protein SLOW GREEN 1, chloroplastic OS=Arabidopsis thaliana GN=SG1 PE=1 SV=1	1.336	Up	SG1	31.6	35.63	158.03	24	9	9	9	8	7	9	9	9	9	9	9	168680000	225320000	184910000	0.874	1.168	0.958
Q9SMW7	Basic transcription factor 3 OS=Arabidopsis thaliana GN=BTF3 PE=1 SV=1	1.285	Up	BTF3	45.5	17.946	77.692	8	5	3	2	4	2	5	5	4	3	3	2	72745000	93471000	57176000	0.977	1.255	0.768
O23406	UDP-glycosyltransferase 75D1 OS=Arabidopsis thaliana GN=UGT75D1 PE=2 SV=2	0.715	Down	UGT75D1	3.8	53.866	11.237	3	2	2	1	1	1	2	2	2	2	2	2	10500000	7513300	9661700	1.138	0.814	1.047
A8MRF4	Peroxidase OS=Arabidopsis thaliana GN=At4g37530 PE=3 SV=1	2.327	Up	At4g37530	22.3	30.937	38.091	6	4	4	2	3	1	3	4	2	3	4	2	15816000	36796000	16872000	0.683	1.589	0.728
Q39172	NADPH-dependent oxidoreductase 2-alkenal reductase OS=Arabidopsis thaliana GN=AER PE=1 SV=1	0.513	Down	AER	46.7	38.133	139.62	44	14	10	19	10	15	14	13	14	10	9	10	699420000	358700000	514350000	1.334	0.684	0.981
Q9SJ13	At2g21860/F7D8.18 OS=Arabidopsis thaliana GN=At2g21860 PE=2 SV=1	0.731	Down	At2g21860	9	59.287	23.354	5	4	4	2	1	2	4	4	4	4	4	4	40157000	29375000	22248000	1.313	0.96	0.727
Q04836	31 kDa ribonucleoprotein, chloroplastic OS=Arabidopsis thaliana GN=CP31A PE=1 SV=1	2.429	Up	CP31A	5.2	35.787	18.383	8	2	2	3	3	2	1	1	2	1	1	2	49175000	119510000	54938000	0.66	1.603	0.737
Q06738	Low-temperature-induced 78 kDa protein OS=Arabidopsis thaliana GN=RD29A PE=1 SV=2	0.719	Down	RD29A	64.8	77.855	323.31	125	32	32	41	33	51	31	27	32	31	27	32	2067100000	1487700000	2387000000	1.044	0.751	1.205
F4I420	Eukaryotic translation initiation factor 2 (eIF-2) family protein OS=Arabidopsis thaliana GN=At1g76810 PE=1 SV=1	1.673	Up	At1g76810	10	142.11	99.012	9	7	7	2	4	3	5	7	6	5	7	6	43441000	72683000	53222000	0.77	1.288	0.943
Q8VZ56	Alpha-amylase 1 OS=Arabidopsis thaliana GN=AMY1 PE=1 SV=1	4.113	Up	AMY1	10.4	47.377	46.708	3	3	3	0	3	0	2	3	2	2	3	2	6662300	27424000	4983100	0.512	2.106	0.383
O22791	Putative RNA-binding protein OS=Arabidopsis thaliana GN=At2g33410 PE=2 SV=1	1.287	Up	At2g33410	11.9	41.328	21.459	4	3	3	1	1	2	3	3	3	3	3	3	117250000	150910000	88801000	0.985	1.268	0.746
Q9FIZ7	5-oxoprolinase OS=Arabidopsis thaliana GN=OXP1 PE=1 SV=1	1.319	Up	OXP1	7.6	137.53	57.491	17	8	8	6	4	7	8	6	8	8	6	8	67212000	88637000	81553000	0.849	1.12	1.031
F4J9G2	Rhodanese/Cell cycle control phosphatase superfamily protein OS=Arabidopsis thaliana GN=At3g59780 PE=4 SV=1	0.788	Down	At3g59780	35.4	73.934	205.17	53	21	21	17	15	21	19	21	20	19	21	20	752730000	593450000	737740000	1.084	0.854	1.062
Q9LPL6	TOM1-like protein 3 OS=Arabidopsis thaliana GN=TOL3 PE=1 SV=1	1.216	Up	TOL3	10.3	55.791	35.745	9	4	3	4	2	3	4	4	4	3	3	3	156880000	190700000	136600000	0.972	1.182	0.846
Q9ZNV4	Cytochrome B5 isoform C OS=Arabidopsis thaliana GN=CYTB5-C PE=1 SV=1	0.581	Down	CYTB5-C	36.4	14.873	30.301	7	3	3	3	1	3	3	3	3	3	3	3	52987000	30796000	57514000	1.125	0.654	1.221
O04130	D-3-phosphoglycerate dehydrogenase 2, chloroplastic OS=Arabidopsis thaliana GN=PGDH2 PE=1 SV=2	0.774	Down	PGDH2	10.7	66.453	37.053	8	5	4	3	3	2	5	5	3	4	4	2	43585000	33758000	60214000	0.951	0.736	1.313
Q38879	Thioredoxin H2 OS=Arabidopsis thaliana GN=TRX2 PE=2 SV=2	1.713	Up	TRX2	17.3	14.676	12.676	4	2	2	2	1	1	2	2	2	2	2	2	36313000	62164000	49065000	0.738	1.264	0.998
Q9LSQ5	NAD(P)H dehydrogenase (quinone) FQR1 OS=Arabidopsis thaliana GN=FQR1 PE=1 SV=1	1.584	Up	FQR1	63.2	21.796	173.48	53	10	10	14	24	15	10	10	9	10	10	9	1387800000	2198300000	1734500000	0.783	1.24	0.978
Q94AF6	AT5g20160/F5O24_50 OS=Arabidopsis thaliana GN=At5g20160 PE=2 SV=1	2.466	Up	At5g20160	35.9	13.897	37.992	7	2	1	2	3	2	2	2	1	1	1	1	35998000	88818000	0	0.577	1.423
O49203	Nucleoside diphosphate kinase III, chloroplastic/mitochondrial OS=Arabidopsis thaliana GN=NDPK3 PE=1 SV=1	0.779	Down	NDPK3	38.7	25.734	128.11	43	9	9	13	14	16	9	9	8	9	9	8	3937000000	3068700000	3631200000	1.11	0.865	1.024
Q9SKZ0	At2g32090/F22D22.16 OS=Arabidopsis thaliana GN=At2g32090 PE=2 SV=2	0.573	Down	At2g32090	19.3	14.996	29.199	6	2	2	2	2	2	2	2	2	2	2	2	159370000	91306000	130340000	1.255	0.719	1.026
P56798	30S ribosomal protein S3, chloroplastic OS=Arabidopsis thaliana GN=rps3 PE=3 SV=1	0.79	Down	rps3	50.5	25.188	121.01	46	13	13	14	15	17	13	13	13	13	13	13	709280000	560360000	816180000	1.02	0.806	1.174
Q9FI47	Putative uncharacterized protein OS=Arabidopsis thaliana GN=At5g51010 PE=2 SV=1	0.802	Down	At5g51010	23.4	17.23	31.261	11	4	4	4	4	3	4	4	4	4	4	4	162820000	130590000	150310000	1.101	0.883	1.016
A0A1P8B661	Gamma-soluble NSF attachment protein OS=Arabidopsis thaliana GN=GSNAP PE=4 SV=1	3.326	Up	GSNAP	13.1	33.241	22.126	4	3	3	1	2	1	3	3	2	3	3	2	24846000	82619000	28296000	0.549	1.826	0.625
A0A1I9LTS5	Sterile alpha motif (SAM) domain-containing protein OS=Arabidopsis thaliana GN=At3g07170 PE=4 SV=1	2.785	Up	At3g07170	15.1	20.735	62.543	3	2	2	1	2	0	2	2	2	2	2	2	32967000	91774000	19175000	0.687	1.913	0.4
Q9LTB2	Methionine S-methyltransferase OS=Arabidopsis thaliana GN=MMT1 PE=1 SV=1	2.079	Up	MMT1	3.6	118.71	19.979	6	3	3	1	3	2	3	3	2	3	3	2	19814000	41193000	32585000	0.635	1.32	1.044
Q56YU0	Aldehyde dehydrogenase family 2 member C4 OS=Arabidopsis thaliana GN=ALDH2C4 PE=1 SV=2	1.574	Up	ALDH2C4	53.1	54.36	309.81	78	28	28	22	34	22	23	26	23	23	26	23	1102100000	1733200000	874140000	0.891	1.402	0.707
P0DKI3	Tropinone reductase homolog At1g07440 OS=Arabidopsis thaliana GN=At1g07440 PE=1 SV=1	0.644	Down	At1g07440	21.1	28.332	60.086	12	5	4	3	3	6	5	5	5	4	4	4	130750000	84245000	105600000	1.224	0.788	0.988
Q9SF91	Ras-related protein RABE1e OS=Arabidopsis thaliana GN=RABE1E PE=1 SV=1	0.682	Down	RABE1E	22.5	24.294	15.938	4	5	0	2	0	2	5	4	5	0	0	0	47851000	32647000	58525000	1.033	0.704	1.263
Q9S850	Sulfite oxidase OS=Arabidopsis thaliana GN=SOX PE=1 SV=1	0.642	Down	SOX	42.2	43.329	211.47	49	15	15	19	12	18	14	14	14	14	14	14	613440000	393790000	490330000	1.229	0.789	0.982
Q8LB10	ATP-dependent Clp protease proteolytic subunit-related protein 4, chloroplastic OS=Arabidopsis thaliana GN=CLPR4 PE=1 SV=1	1.301	Up	CLPR4	17.4	33.44	47.834	20	4	4	7	6	7	4	4	4	4	4	4	459730000	598430000	492160000	0.89	1.158	0.952
F4JW56	Peptidylprolyl isomerase OS=Arabidopsis thaliana GN=PnsL4 PE=4 SV=1	0.827	Down	PnsL4	42.9	19.113	65.924	26	6	6	8	10	8	6	6	6	6	6	6	744450000	615910000	731070000	1.068	0.883	1.049
Q8RWN5	Glycine-rich RNA-binding protein RZ1C OS=Arabidopsis thaliana GN=RZ1C PE=1 SV=1	1.764	Up	RZ1C	14.5	33.486	26.647	10	4	4	3	4	3	4	4	3	4	4	3	66379000	117150000	61508000	0.813	1.434	0.753
Q9FEA2	Glutamate--tRNA ligase, chloroplastic/mitochondrial OS=Arabidopsis thaliana GN=OVA3 PE=1 SV=1	1.559	Up	OVA3	20	63.465	95.909	18	9	9	4	10	4	8	9	7	8	9	7	123990000	193360000	190200000	0.733	1.143	1.124
Q9M1X8	Nucleic acid-binding, OB-fold-like protein OS=Arabidopsis thaliana GN=F24G16.250 PE=2 SV=1	0.811	Down	F24G16.250	39.6	29.745	110.82	17	7	7	6	6	5	6	6	4	6	6	4	268990000	218180000	228490000	1.128	0.915	0.958
Q501F7	At1g21440 OS=Arabidopsis thaliana GN=At1g21440 PE=2 SV=1	0.711	Down	At1g21440	33.9	36.306	157.63	33	10	9	13	9	11	9	10	9	8	9	8	728240000	518120000	590000000	1.19	0.846	0.964
Q94K74	Putative uncharacterized protein At3g25805 OS=Arabidopsis thaliana GN=At3g25805 PE=2 SV=1	0.832	Down	At3g25805	3.9	38.755	7.6113	4	1	1	1	1	2	1	1	1	1	1	1	23200000	19298000	33989000	0.91	0.757	1.333
Q9M8R4	Protein DJ-1 homolog D OS=Arabidopsis thaliana GN=DJ1D PE=1 SV=1	0.469	Down	DJ1D	15.5	41.645	27.877	6	4	4	2	2	2	3	2	3	3	2	3	59416000	27874000	45666000	1.341	0.629	1.03
O49303	Protein C2-DOMAIN ABA-RELATED 8 OS=Arabidopsis thaliana GN=CAR8 PE=2 SV=1	1.514	Up	CAR8	24.2	18.569	26.709	5	4	3	2	2	1	4	4	3	3	3	2	280040000	424090000	285830000	0.849	1.285	0.866
A0A1P8APR6	Glyceraldehyde-3-phosphate dehydrogenase OS=Arabidopsis thaliana GN=GAPA-2 PE=3 SV=1	0.782	Down	GAPA-2	52.8	47.604	323.31	127	21	9	44	42	41	20	20	19	8	8	7	16236000000	12689000000	15959000000	1.085	0.848	1.067
Q39129	Thiosulfate sulfurtransferase 16, chloroplastic OS=Arabidopsis thaliana GN=STR16 PE=1 SV=2	0.614	Down	STR16	76.7	12.676	148.22	20	5	5	9	5	6	5	5	5	5	5	5	612860000	376240000	378620000	1.344	0.825	0.83
Q9FKB0	Sm-like protein LSM5 OS=Arabidopsis thaliana GN=LSM5 PE=1 SV=1	1.604	Up	LSM5	28.4	9.658	12.273	3	2	2	1	2	0	2	2	1	2	2	1	20824000	33427000	0	0.768	1.232
Q9ZW18	Senescence-associated protein 13 OS=Arabidopsis thaliana GN=SAG13 PE=1 SV=1	2.992	Up	SAG13	21.9	28.819	20.238	6	5	2	1	5	0	4	5	4	1	2	1	24286000	72688000	24493000	0.6	1.795	0.605
Q9FK35	Adenylate kinase 3 OS=Arabidopsis thaliana GN=ADK2 PE=1 SV=1	0.831	Down	ADK2	37.9	27.335	54.292	13	9	8	6	3	4	9	8	8	8	7	7	162460000	134930000	176740000	1.028	0.854	1.118
O23717	Proteasome subunit beta type-5-A OS=Arabidopsis thaliana GN=PBE1 PE=1 SV=1	1.2	Up	PBE1	51.5	29.667	193.4	26	11	11	10	9	7	10	10	8	10	10	8	277080000	332830000	316190000	0.898	1.078	1.024
F4K329	Plasma membrane fusion protein OS=Arabidopsis thaliana GN=At5g42765 PE=4 SV=1	1.311	Up	At5g42765	26.6	25.098	102.64	12	5	5	4	6	2	5	5	5	5	5	5	674640000	884560000	580580000	0.946	1.24	0.814
Q8RY94	Adenylosuccinate lyase OS=Arabidopsis thaliana GN=At4g18440 PE=1 SV=1	0.8	Down	At4g18440	51.1	59.757	291.92	84	25	17	25	25	34	25	24	24	17	17	17	2867200000	2293900000	4242300000	0.915	0.732	1.353
Q9LZ66	Assimilatory sulfite reductase (ferredoxin), chloroplastic OS=Arabidopsis thaliana GN=SIR PE=1 SV=1	0.707	Down	SIR	32.2	71.949	238.47	75	20	20	25	22	28	20	19	20	20	19	20	2489800000	1762400000	2255300000	1.148	0.812	1.04
A0A1P8AS55	Beta-carotene isomerase D27 OS=Arabidopsis thaliana GN=At1g64680 PE=4 SV=1	0.552	Down	At1g64680	12.7	23.173	16.731	3	3	3	0	0	3	3	3	3	3	3	3	58391000	32275000	85572000	0.994	0.549	1.457
Q38942	Protein RAE1 OS=Arabidopsis thaliana GN=RAE1 PE=1 SV=2	1.564	Up	RAE1	12	38.268	20.018	7	3	3	2	3	2	2	3	3	2	3	3	24739000	38662000	31819000	0.779	1.218	1.002
F4JW69	Phenylalanine ammonia-lyase OS=Arabidopsis thaliana GN=PAL3 PE=3 SV=1	0.76	Down	PAL3	10.3	76.673	44.484	7	6	5	3	1	3	5	4	5	4	3	4	21541000	16372000	34434000	0.893	0.679	1.428
F4JHJ0	HSP20-like chaperones superfamily protein OS=Arabidopsis thaliana GN=At4g02450 PE=1 SV=1	1.701	Up	At4g02450	30	25.341	74.76	23	7	7	6	8	9	7	7	7	7	7	7	356180000	605850000	394120000	0.788	1.34	0.872
Q8GZ87	At1g14380 OS=Arabidopsis thaliana GN=IQD28 PE=1 SV=1	1.793	Up	IQD28	10.8	72.848	37.36	7	5	5	2	3	2	5	5	4	5	5	4	30433000	54591000	36125000	0.754	1.352	0.895
Q9XH75	Sec-independent protein translocase protein TATB, chloroplastic OS=Arabidopsis thaliana GN=TATB PE=1 SV=1	1.391	Up	TATB	13.1	28.231	22.378	8	4	4	3	3	2	4	4	4	4	4	4	247530000	344500000	217830000	0.917	1.276	0.807
Q0WNW0	Glycosyl hydrolase family protein OS=Arabidopsis thaliana GN=At5g04885 PE=2 SV=1	1.255	Up	At5g04885	6.5	72.303	27.805	6	4	4	3	2	1	4	2	3	4	2	3	47782000	59977000	45412000	0.936	1.175	0.889
Q42418	Profilin-2 OS=Arabidopsis thaliana GN=PRO2 PE=2 SV=1	1.316	Up	PRO2	58.8	13.998	208.04	41	7	5	14	12	15	7	7	7	5	5	5	1047800000	1378700000	928000000	0.937	1.233	0.83
Q9FM19	Hypersensitive-induced response protein 1 OS=Arabidopsis thaliana GN=HIR1 PE=1 SV=1	1.303	Up	HIR1	19.9	31.431	19.204	9	6	3	2	4	3	6	6	6	3	3	3	95187000	124050000	78334000	0.96	1.251	0.79
Q9SN68	Ras-related protein RABF2b OS=Arabidopsis thaliana GN=RABF2B PE=1 SV=1	1.259	Up	RABF2B	15	21.873	18.135	5	3	3	0	2	3	3	3	3	3	3	3	23202000	29208000	22332000	0.931	1.172	0.896
P46032	Protein NRT1/ PTR FAMILY 8.3 OS=Arabidopsis thaliana GN=NPF8.3 PE=1 SV=1	1.264	Up	NPF8.3	14.7	64.421	72.319	17	7	7	6	6	5	7	7	7	7	7	7	60307000	76179000	61370000	0.914	1.155	0.931
F4JB71	Cysteine proteinases superfamily protein OS=Arabidopsis thaliana GN=At3g19400 PE=3 SV=1	1.29	Up	At3g19400	13.1	32.611	36.687	9	2	2	2	3	4	2	2	2	2	2	2	81359000	104960000	81950000	0.91	1.174	0.916
Q93V62	AT4g27450/F27G19_50 OS=Arabidopsis thaliana GN=At4g27450 PE=1 SV=1	1.312	Up	At4g27450	24	27.622	37	7	4	4	4	2	1	4	4	3	4	4	3	42739000	56041000	47854000	0.874	1.147	0.979
Q9SDM9	Nitrile-specifier protein 1 OS=Arabidopsis thaliana GN=NSP1 PE=2 SV=2	0.563	Down	NSP1	38.9	51.669	162.42	45	15	4	14	10	21	15	14	15	4	3	4	581330000	327550000	861050000	0.985	0.555	1.459
Q9FN08	Beta-galactosidase 10 OS=Arabidopsis thaliana GN=BGAL10 PE=2 SV=1	0.443	Down	BGAL10	8.2	83.101	28.996	8	5	4	3	2	3	5	4	4	4	3	3	50941000	22579000	45800000	1.281	0.568	1.152
Q94C74	Serine hydroxymethyltransferase 2, mitochondrial OS=Arabidopsis thaliana GN=SHM2 PE=1 SV=2	1.377	Up	SHM2	42.4	57.341	58.043	14	20	8	4	5	5	19	19	20	7	7	8	100250000	138110000	108560000	0.867	1.194	0.939
Q9LV60	Cysteine-rich repeat secretory protein 55 OS=Arabidopsis thaliana GN=CRRSP55 PE=2 SV=1	1.517	Up	CRRSP55	25.1	28.995	54.838	18	7	7	6	8	4	6	7	7	6	7	7	304100000	461510000	243950000	0.904	1.371	0.725
Q84WJ9	At5g19680 OS=Arabidopsis thaliana GN=At5g19680 PE=2 SV=1	0.439	Down	At5g19680	8.8	36.985	19.039	5	3	3	1	1	3	2	2	3	2	2	3	170670000	75011000	45398000	1.759	0.773	0.468
Q9FM47	RNA-binding (RRM/RBD/RNP motifs) family protein OS=Arabidopsis thaliana GN=MNF13.1 PE=2 SV=1	1.453	Up	MNF13.1	18	42.407	48.11	9	6	6	3	4	2	4	6	5	4	6	5	43746000	63567000	45236000	0.86	1.25	0.89
O49653	Probable tRNA N6-adenosine threonylcarbamoyltransferase OS=Arabidopsis thaliana GN=GCP2 PE=2 SV=1	1.793	Up	GCP2	8.5	38.767	14.569	2	2	2	0	2	0	2	2	1	2	2	1	17594000	31576000	0	0.716	1.284
Q8LGE7	NADH dehydrogenase [ubiquinone] 1 alpha subcomplex subunit 8-B OS=Arabidopsis thaliana GN=At5g18800 PE=1 SV=1	2.401	Up	At5g18800	27.4	11.968	45.94	5	2	2	1	3	1	2	2	2	2	2	2	22650000	54362000	16268000	0.728	1.748	0.523
Q9T0H1	At4g13500 OS=Arabidopsis thaliana GN=At4g13500 PE=2 SV=1	1.412	Up	At4g13500	23.2	13.817	28.46	6	3	2	2	2	2	3	3	3	2	2	2	43235000	61019000	55121000	0.814	1.149	1.038
Q42525	Hexokinase-1 OS=Arabidopsis thaliana GN=HXK1 PE=1 SV=2	0.712	Down	HXK1	31.7	53.706	125.91	28	11	8	10	8	10	10	11	11	7	8	8	600360000	427070000	630530000	1.086	0.773	1.141
Q39023	Mitogen-activated protein kinase 3 OS=Arabidopsis thaliana GN=MPK3 PE=1 SV=2	1.879	Up	MPK3	31.9	42.716	75.579	15	9	8	4	8	3	9	9	7	8	8	6	168980000	317620000	121570000	0.834	1.567	0.6
Q9LW88	Nuclear pore complex protein NUP50B OS=Arabidopsis thaliana GN=NUP50B PE=1 SV=1	1.809	Up	NUP50B	9.5	49.108	33.751	6	4	4	1	4	1	2	4	2	2	4	2	8387900	15164000	8903400	0.775	1.402	0.823
Q9SKU8	At2g20690/F5H14.34 OS=Arabidopsis thaliana GN=At2g20690 PE=2 SV=2	0.745	Down	At2g20690	17	29.639	39.201	17	6	6	5	6	6	6	6	5	6	6	5	485030000	360920000	486410000	1.092	0.813	1.095
Q944G9	Fructose-bisphosphate aldolase 2, chloroplastic OS=Arabidopsis thaliana GN=FBA2 PE=1 SV=2	0.689	Down	FBA2	77.1	42.987	323.31	263	26	17	90	84	89	26	26	26	17	17	17	64686000000	44518000000	48559000000	1.23	0.847	0.923
O22527	Chlorophyllase-1 OS=Arabidopsis thaliana GN=CLH1 PE=1 SV=1	0.772	Down	CLH1	36.1	34.854	100.7	28	8	8	10	7	11	8	8	8	8	8	8	561790000	433150000	778350000	0.95	0.733	1.317
P25851	Fructose-1,6-bisphosphatase 1, chloroplastic OS=Arabidopsis thaliana GN=CFBP1 PE=1 SV=2	0.745	Down	CFBP1	49.4	45.161	323.31	131	18	18	48	41	42	18	17	18	18	17	18	13316000000	9912900000	12403000000	1.121	0.835	1.044
P54150	Peptide methionine sulfoxide reductase A4, chloroplastic OS=Arabidopsis thaliana GN=MSR4 PE=1 SV=2	0.807	Down	MSR4	34.1	28.644	148.42	29	7	7	9	11	9	7	7	7	7	7	7	1638900000	1322400000	1526400000	1.096	0.884	1.02
Q9LUG8	AT3g23600/MDB19_9 OS=Arabidopsis thaliana GN=At3g23600 PE=2 SV=1	0.833	Down	At3g23600	65.3	25.861	203.17	42	10	10	17	12	13	10	10	10	10	10	10	1168100000	973300000	1206300000	1.047	0.872	1.081
F4HR88	Leucine-rich repeat (LRR) family protein OS=Arabidopsis thaliana GN=At1g33590 PE=4 SV=1	0.699	Down	At1g33590	48.4	51.741	228.81	36	16	15	15	7	14	15	13	16	14	12	15	959180000	670200000	1095700000	1.056	0.738	1.206
A0A1P8ASL8	GDSL-like Lipase/Acylhydrolase superfamily protein OS=Arabidopsis thaliana GN=At1g29670 PE=4 SV=1	0.799	Down	At1g29670	46.2	47.73	323.31	59	15	15	19	20	20	15	13	15	15	13	15	1558900000	1244500000	1948900000	0.984	0.786	1.23
Q93VT9	60S ribosomal protein L10-1 OS=Arabidopsis thaliana GN=RPL10A PE=1 SV=1	1.315	Up	RPL10A	36.8	24.917	75.598	30	10	5	10	9	11	9	6	10	4	3	5	264920000	348250000	395000000	0.788	1.036	1.175
Q9FR37	Amidase 1 OS=Arabidopsis thaliana GN=AMI1 PE=1 SV=1	0.679	Down	AMI1	26.1	45.056	60.513	12	6	6	5	2	5	6	6	6	6	6	6	258390000	175480000	186940000	1.249	0.848	0.903
Q9LRR9	Peroxisomal (S)-2-hydroxy-acid oxidase GLO1 OS=Arabidopsis thaliana GN=GLO1 PE=1 SV=1	0.756	Down	GLO1	79.6	40.341	102.67	42	26	8	11	15	16	26	26	26	8	8	8	4213200000	3183500000	3784000000	1.13	0.854	1.015
A0A1I9LRK5	DnaJ (DUF3353) OS=Arabidopsis thaliana GN=At3g51140 PE=1 SV=1	0.699	Down	At3g51140	22.3	26.099	32.334	7	4	4	0	3	4	3	4	3	3	4	3	199780000	139600000	147680000	1.231	0.86	0.91
F4I035	RNA 3'-terminal phosphate cyclase/enolpyruvate transferase, alpha/beta OS=Arabidopsis thaliana GN=At1g48860 PE=3 SV=1	1.267	Up	At1g48860	14.9	52.407	29.055	10	6	3	4	2	4	6	6	5	3	3	2	42893000	54341000	62752000	0.804	1.019	1.177
Q7XA74	Inactive GDSL esterase/lipase-like protein 25 OS=Arabidopsis thaliana GN=MVP1 PE=1 SV=1	0.817	Down	MVP1	14.1	46.082	33.59	11	5	5	4	4	3	5	4	5	5	4	5	131040000	107120000	97302000	1.172	0.958	0.87
Q9LVJ1	Subtilisin-like protease SBT1.4 OS=Arabidopsis thaliana GN=SBT1.4 PE=2 SV=1	0.692	Down	SBT1.4	31	81.816	191.09	49	14	13	18	14	17	14	13	13	13	12	12	2195800000	1519900000	2431600000	1.072	0.742	1.187
Q38842	AT0ZI1 protein OS=Arabidopsis thaliana GN=ATOZI1 PE=2 SV=1	1.425	Up	ATOZI1	51.2	8.6058	28.023	8	4	4	3	3	2	4	4	4	4	4	4	103920000	148190000	117360000	0.844	1.203	0.953
Q9S7B5	Threonine synthase 1, chloroplastic OS=Arabidopsis thaliana GN=TS1 PE=1 SV=1	0.743	Down	TS1	33.7	57.776	192.97	50	15	13	17	16	17	15	15	15	13	13	13	615100000	457490000	701800000	1.04	0.773	1.187
Q9ZTZ7	K(+) efflux antiporter 1, chloroplastic OS=Arabidopsis thaliana GN=KEA1 PE=1 SV=2	1.216	Up	KEA1	14.9	128.03	141.3	28	14	12	8	11	9	12	12	13	10	10	11	213470000	259460000	219140000	0.925	1.125	0.95
A0A1P8AVX3	EMS-MUTAGENIZED BRI1 SUPPRESSOR 1 OS=Arabidopsis thaliana GN=EBS1 PE=4 SV=1	1.247	Up	EBS1	7.3	186.41	75.591	18	10	10	5	7	6	8	10	10	8	10	10	75571000	94214000	85530000	0.888	1.107	1.005
F4J6A8	DnaJ and Myb-like DNA-binding domain-containing protein OS=Arabidopsis thaliana GN=At3g11450 PE=4 SV=1	1.458	Up	At3g11450	10	73.989	36.135	10	6	6	3	5	2	4	6	6	4	6	6	40673000	59274000	35410000	0.901	1.314	0.785
Q42403	Thioredoxin H3 OS=Arabidopsis thaliana GN=TRX3 PE=1 SV=1	1.805	Up	TRX3	62.7	13.109	210.52	24	8	8	6	10	8	8	8	8	8	8	8	156700000	282680000	266180000	0.666	1.202	1.132
P56754	NAD(P)H-quinone oxidoreductase subunit J, chloroplastic OS=Arabidopsis thaliana GN=ndhJ PE=3 SV=1	0.653	Down	ndhJ	44.9	18.558	53.734	18	7	7	6	6	6	6	7	7	6	7	7	298510000	195030000	292590000	1.139	0.744	1.117
A0A1P8AV66	Translation elongation factor EF1B/ribosomal protein S6 family protein OS=Arabidopsis thaliana GN=At1g64510 PE=3 SV=1	1.355	Up	At1g64510	7.4	25.46	30.147	11	1	1	4	4	3	1	1	1	1	1	1	116350000	157740000	108790000	0.912	1.236	0.852
P59230	60S ribosomal protein L10a-2 OS=Arabidopsis thaliana GN=RPL10AB PE=1 SV=1	1.322	Up	RPL10AB	38	24.425	80.06	29	9	4	9	8	12	6	7	7	2	3	4	546760000	722850000	616470000	0.87	1.15	0.981
Q8VWF1	SH3 domain-containing protein 2 OS=Arabidopsis thaliana GN=SH3P2 PE=1 SV=1	1.571	Up	SH3P2	12.8	40.925	32.469	5	4	3	0	3	2	3	4	3	2	3	2	11224000	17638000	16813000	0.737	1.158	1.104
Q9LNC4	Transcription factor GTE4 OS=Arabidopsis thaliana GN=GTE4 PE=2 SV=1	2.604	Up	GTE4	2.9	84.094	11.172	2	2	2	0	2	0	2	2	1	2	2	1	3902400	10159000	0	0.555	1.445
Q501F4	At3g19990 OS=Arabidopsis thaliana GN=At3g19990 PE=2 SV=1	1.554	Up	At3g19990	11.3	48.415	28.865	5	5	5	0	3	2	4	5	4	4	5	4	15886000	24660000	21957000	0.762	1.184	1.054
A0A1P8AVY5	Alpha/beta-Hydrolases superfamily protein OS=Arabidopsis thaliana GN=At1g35420 PE=4 SV=1	1.28	Up	At1g35420	32.8	30.586	57.948	17	7	7	4	7	6	5	7	6	5	7	6	189150000	242310000	233950000	0.853	1.092	1.055
F4JKW0	Thioredoxin family protein OS=Arabidopsis thaliana GN=At4g10000 PE=4 SV=1	0.674	Down	At4g10000	21	37.056	51.377	8	5	5	3	2	3	5	5	5	5	5	5	65398000	44022000	60825000	1.152	0.776	1.072
Q9M390	Protein NRT1/ PTR FAMILY 8.1 OS=Arabidopsis thaliana GN=NPF8.1 PE=1 SV=1	0.751	Down	NPF8.1	3.3	64.033	12.15	5	2	2	2	1	2	2	2	2	2	2	2	23293000	17492000	36100000	0.909	0.683	1.409
Q8RX71	BAG family molecular chaperone regulator 4 OS=Arabidopsis thaliana GN=BAG4 PE=1 SV=1	1.201	Up	BAG4	13.8	29.21	31.333	6	4	4	1	3	2	3	4	3	3	4	3	30028000	36065000	24814000	0.991	1.19	0.819
O24457	Pyruvate dehydrogenase E1 component subunit alpha-3, chloroplastic OS=Arabidopsis thaliana GN=PDH-E1 ALPHA PE=2 SV=1	1.41	Up	PDH-E1	29.2	47.173	100.4	29	10	10	7	12	10	9	10	10	9	10	10	197170000	277940000	231680000	0.837	1.18	0.983
F4JV80	Glutamyl-tRNA(Gln) amidotransferase subunit C, chloroplastic/mitochondrial OS=Arabidopsis thaliana GN=GATC PE=2 SV=1	2.412	Up	GATC	16.8	17.518	23.942	4	2	2	1	2	1	2	2	2	2	2	2	32097000	77425000	35311000	0.665	1.604	0.731
Q9ZSK3	Actin-depolymerizing factor 4 OS=Arabidopsis thaliana GN=ADF4 PE=1 SV=2	2.004	Up	ADF4	45.3	16.034	48.385	5	4	3	0	4	1	3	4	3	2	3	2	22308000	44726000	25813000	0.721	1.445	0.834
Q9C909	Glycine-rich RNA-binding protein 5, mitochondrial OS=Arabidopsis thaliana GN=RBG5 PE=1 SV=1	1.616	Up	RBG5	23.2	28.728	91.906	17	5	5	4	8	5	5	5	4	5	5	4	366890000	592940000	281740000	0.887	1.433	0.681
P49599	Protein phosphatase 2C 57 OS=Arabidopsis thaliana GN=PPH1 PE=1 SV=2	0.828	Down	PPH1	28.4	42.719	64.314	23	8	8	7	7	9	7	8	8	7	8	8	236200000	195660000	239430000	1.056	0.874	1.07
Q56YP1	Chorismate synthase OS=Arabidopsis thaliana GN=At4g01290 PE=1 SV=1	1.449	Up	At4g01290	11.7	108.49	79.091	12	7	7	3	7	2	4	7	4	4	7	4	42309000	61302000	42800000	0.867	1.256	0.877
O23049	50S ribosomal protein L6, chloroplastic OS=Arabidopsis thaliana GN=RPL6 PE=2 SV=1	0.736	Down	RPL6	60.1	24.705	127.79	42	16	16	14	11	17	16	16	16	16	16	16	1109100000	816170000	1298100000	1.032	0.76	1.208
Q84Y95	Monothiol glutaredoxin-S14, chloroplastic OS=Arabidopsis thaliana GN=GRXS14 PE=1 SV=2	0.578	Down	GRXS14	19.7	19.309	21.686	10	2	2	3	3	4	2	2	2	2	2	2	194690000	112490000	166200000	1.234	0.713	1.053
F4HXZ1	Vacuolar-sorting protein BRO1 OS=Arabidopsis thaliana GN=BRO1 PE=1 SV=1	1.302	Up	BRO1	11.2	95.208	59.647	16	9	9	5	6	5	7	8	9	7	8	9	117410000	152900000	116530000	0.911	1.186	0.904
Q9FIM2	ATP-dependent zinc metalloprotease FTSH 9, chloroplastic OS=Arabidopsis thaliana GN=FTSH9 PE=2 SV=1	1.959	Up	FTSH9	6.8	87.837	28.208	8	4	4	3	3	2	4	3	4	4	3	4	10680000	20930000	14848000	0.69	1.352	0.959
Q9LV33	Beta-glucosidase 44 OS=Arabidopsis thaliana GN=BGLU44 PE=2 SV=1	0.775	Down	BGLU44	45.3	58.983	323.31	94	23	23	31	31	32	23	23	23	23	23	23	2535600000	1964100000	2637100000	1.066	0.826	1.109
Q9ZW85	3-isopropylmalate dehydratase small subunit 3 OS=Arabidopsis thaliana GN=At2g43090 PE=1 SV=1	1.572	Up	At2g43090	38.2	26.79	74.278	23	7	5	7	11	5	7	7	7	5	5	5	316920000	498300000	424010000	0.767	1.206	1.026
Q9C9M1	Protein-lysine N-methyltransferase At1g66680 OS=Arabidopsis thaliana GN=AR401 PE=1 SV=1	1.708	Up	AR401	11.5	39.229	19.84	4	3	3	0	3	1	3	3	3	3	3	3	15274000	26106000	14383000	0.822	1.404	0.774
O04202	Eukaryotic translation initiation factor 3 subunit F OS=Arabidopsis thaliana GN=TIF3F1 PE=1 SV=1	1.278	Up	TIF3F1	56.3	31.862	172.63	25	10	10	7	9	9	10	10	10	10	10	10	351130000	448760000	423730000	0.861	1.1	1.039
Q9LJH8	Oligouridylate-binding protein 1C OS=Arabidopsis thaliana GN=UBP1C PE=1 SV=1	1.211	Up	UBP1C	11.9	47.088	28.477	10	5	1	3	4	3	4	5	4	0	1	0	47865000	58019000	48915000	0.928	1.124	0.948
F4HRB4	Triacylglycerol lipase-like 1 OS=Arabidopsis thaliana GN=TLL1 PE=4 SV=1	0.408	Down	TLL1	38.8	44.118	144.65	41	13	13	12	12	17	13	12	13	13	12	13	1013200000	412840000	1752300000	0.956	0.39	1.654
O22869	Defensin-like protein 197 OS=Arabidopsis thaliana GN=ATTI6 PE=3 SV=1	0.712	Down	ATTI6	29.2	10.192	30.329	4	2	2	1	1	2	2	2	2	2	2	2	94643000	67439000	159430000	0.883	0.629	1.488
Q9LVM5	Uric acid degradation bifunctional protein TTL OS=Arabidopsis thaliana GN=TTL PE=1 SV=1	1.219	Up	TTL	29.9	35.564	70.095	13	7	7	6	6	1	7	7	7	7	7	7	60003000	73184000	48710000	0.99	1.207	0.803
Q9SS48	Glycerol-3-phosphate dehydrogenase SDP6, mitochondrial OS=Arabidopsis thaliana GN=SDP6 PE=1 SV=1	0.768	Down	SDP6	21.9	68.45	79.686	20	11	11	8	6	6	10	9	11	10	9	11	147840000	113510000	124430000	1.15	0.883	0.968
Q9M084	Aspartate--tRNA ligase 2, cytoplasmic OS=Arabidopsis thaliana GN=IBI1 PE=1 SV=1	1.209	Up	IBI1	28	62.917	142.44	30	13	11	7	11	12	10	13	11	9	11	9	194060000	234460000	242590000	0.867	1.048	1.084
Q9SID0	Probable fructokinase-1 OS=Arabidopsis thaliana GN=At2g31390 PE=2 SV=1	1.848	Up	At2g31390	39.7	35.275	85.969	21	9	8	7	9	5	8	9	7	7	8	6	253520000	468800000	217080000	0.81	1.497	0.693
F4J3D0	Calcium-dependent phosphotriesterase superfamily protein OS=Arabidopsis thaliana GN=YLS2 PE=4 SV=1	1.417	Up	YLS2	6.5	41.455	21.661	10	3	3	3	4	3	3	3	2	3	3	2	60393000	85597000	58824000	0.885	1.254	0.862
Q9C6W4	Beta-galactosidase 15 OS=Arabidopsis thaliana GN=BGAL15 PE=2 SV=1	0.451	Down	BGAL15	1.4	86.341	7.0471	7	1	1	2	2	3	1	1	1	1	1	1	25358000	11419000	20444000	1.329	0.599	1.072
Q9FK60	Superoxide dismutase [Cu-Zn] 3 OS=Arabidopsis thaliana GN=CSD3 PE=1 SV=1	0.805	Down	CSD3	50.6	16.941	55.836	22	7	6	8	6	8	7	6	7	6	5	6	1436200000	1156900000	1198200000	1.136	0.915	0.948
Q9ZST4	Nitrogen regulatory protein P-II homolog OS=Arabidopsis thaliana GN=GLB1 PE=1 SV=1	0.786	Down	GLB1	36.2	21.275	148.34	33	8	8	11	10	12	7	7	8	7	7	8	1165300000	915580000	1067300000	1.11	0.872	1.017
Q9LSK7	At3g18035 OS=Arabidopsis thaliana GN=HON4 PE=1 SV=1	0.804	Down	HON4	8.3	51.524	22.582	4	3	3	2	1	1	3	3	2	3	3	2	41296000	33219000	33652000	1.145	0.921	0.933
A0A1P8BG37	Photosystem II stability/assembly factor, chloroplast (HCF136) OS=Arabidopsis thaliana GN=HCF136 PE=4 SV=1	0.776	Down	HCF136	62.4	46.913	323.31	140	25	25	47	47	46	24	24	25	24	24	25	8404000000	6521600000	6372000000	1.184	0.919	0.898
Q9LDV4	Alanine aminotransferase 2, mitochondrial OS=Arabidopsis thaliana GN=ALAAT2 PE=2 SV=1	3.077	Up	ALAAT2	17.6	59.51	23.154	3	9	4	0	3	0	9	9	8	4	4	3	25650000	78926000	24721000	0.595	1.831	0.574
A0A1P8AVD8	Ketose-bisphosphate aldolase class-II family protein OS=Arabidopsis thaliana GN=At1g18270 PE=4 SV=1	1.542	Up	At1g18270	6.8	140.72	52.123	11	8	8	1	8	2	5	8	7	5	8	7	84688000	130530000	70253000	0.89	1.372	0.738
Q93WL3	ATP-dependent Clp protease ATP-binding subunit CLPT1, chloroplastic OS=Arabidopsis thaliana GN=CLPT1 PE=1 SV=1	1.665	Up	CLPT1	31.5	26.05	84.16	19	5	5	6	8	5	5	5	5	5	5	5	352750000	587230000	322810000	0.838	1.395	0.767
Q8VZ95	Vesicle-associated protein 1-1 OS=Arabidopsis thaliana GN=PVA11 PE=1 SV=1	1.865	Up	PVA11	9.8	28.472	16.68	3	3	3	0	3	0	2	3	2	2	3	2	8651300	16122000	9003600	0.768	1.432	0.8
F4IFA9	Pyridoxamine 5'-phosphate oxidase family protein OS=Arabidopsis thaliana GN=At2g04690 PE=4 SV=1	0.81	Down	At2g04690	45.8	22.821	65.638	19	8	8	6	6	7	6	8	6	6	8	6	415990000	336770000	325630000	1.157	0.937	0.906
O04023	Protein SRC2 homolog OS=Arabidopsis thaliana GN=SRC2 PE=1 SV=1	2.18	Up	SRC2	18.8	34.189	50.057	15	5	5	5	6	4	5	5	5	5	5	5	168160000	366290000	122880000	0.767	1.672	0.561
Q84WM9	Elongation factor 1-beta 1 OS=Arabidopsis thaliana GN=At5g12110 PE=2 SV=2	0.812	Down	At5g12110	27.6	24.788	35.252	9	5	4	2	4	3	4	5	5	3	4	4	89215000	72474000	102650000	1.013	0.823	1.165
Q94JQ3	Serine hydroxymethyltransferase 3, chloroplastic OS=Arabidopsis thaliana GN=SHM3 PE=1 SV=2	1.381	Up	SHM3	30.1	57.982	163.7	26	16	16	7	8	11	15	15	14	15	15	14	171970000	237590000	215300000	0.826	1.141	1.034
Q9FVC8	4-hydroxy-tetrahydrodipicolinate synthase 2, chloroplastic OS=Arabidopsis thaliana GN=DHDPS2 PE=1 SV=2	2.208	Up	DHDPS2	18.9	40.292	42.157	6	7	3	1	4	1	6	7	5	3	3	2	23604000	52079000	25989000	0.696	1.537	0.767
Q9S7U9	Mitogen-activated protein kinase kinase 2 OS=Arabidopsis thaliana GN=MKK2 PE=1 SV=2	1.433	Up	MKK2	15.4	39.848	36.025	8	5	5	1	4	3	4	4	4	4	4	4	51331000	73572000	52994000	0.866	1.241	0.894
Q9T080	UDP-glycosyltransferase 79B2 OS=Arabidopsis thaliana GN=UGT79B2 PE=2 SV=1	0.8	Down	UGT79B2	7	50.615	19.562	7	3	3	2	2	3	2	2	3	2	2	3	19759000	15811000	35803000	0.831	0.665	1.505
Q9FLH8	Probable fructokinase-7 OS=Arabidopsis thaliana GN=At5g51830 PE=1 SV=1	2.125	Up	At5g51830	20.7	37.028	33.039	4	7	5	0	4	0	4	7	3	2	5	1	16228000	34500000	0	0.64	1.36
Q8W4F3	Glutamine--tRNA ligase, cytoplasmic OS=Arabidopsis thaliana GN=OVA9 PE=2 SV=1	1.46	Up	OVA9	14.3	91.246	55.412	16	9	9	2	7	7	7	9	8	7	9	8	72721000	106170000	102110000	0.776	1.133	1.09
Q9M1J1	Mitochondrial fission 1 protein A OS=Arabidopsis thaliana GN=FIS1A PE=1 SV=1	1.47	Up	FIS1A	30.6	18.698	43.667	7	4	4	2	3	2	3	4	4	3	4	4	38111000	56005000	46094000	0.815	1.198	0.986
Q9FYK3	F21J9.27 OS=Arabidopsis thaliana GN=At1g24610 PE=4 SV=1	1.255	Up	At1g24610	8.2	52.589	21.387	5	3	3	1	2	2	3	2	2	3	2	2	12114000	15199000	11389000	0.939	1.178	0.883
P46283	Sedoheptulose-1,7-bisphosphatase, chloroplastic OS=Arabidopsis thaliana GN=At3g55800 PE=2 SV=1	0.733	Down	At3g55800	57	42.414	323.31	145	21	21	49	44	52	20	21	20	20	21	20	20482000000	15021000000	18937000000	1.129	0.828	1.044
Q9MAH0	Phosphoenolpyruvate carboxylase 1 OS=Arabidopsis thaliana GN=PPC1 PE=1 SV=1	0.26	Up	PPC1	55.8	110.28	300.12	73	46	14	23	27	23	42	43	44	14	14	14	767010000	966690000	867290000	0.885	1.115	1
Q9SMU7	Signal recognition particle 9 kDa protein OS=Arabidopsis thaliana GN=SRP9 PE=3 SV=1	1.554	Up	SRP9	41.7	12.023	26.96	6	4	4	2	4	0	3	4	3	3	4	3	52563000	81623000	52380000	0.845	1.313	0.842
Q9SN82	Alpha/beta-Hydrolases superfamily protein OS=Arabidopsis thaliana GN=F1P2.110 PE=1 SV=1	1.247	Up	F1P2.110	27.5	29.869	65.654	19	7	6	5	8	6	6	7	7	5	6	6	133400000	166470000	171780000	0.849	1.059	1.093
Q9SL48	SEC1 family transport protein SLY1 OS=Arabidopsis thaliana GN=SLY1 PE=1 SV=1	1.474	Up	SLY1	17.7	69.15	65.456	14	10	10	5	7	2	8	10	6	8	10	6	80094000	118050000	74373000	0.882	1.3	0.819
F4INU4	Phototropic-responsive NPH3 family protein OS=Arabidopsis thaliana GN=RPT2 PE=3 SV=1	2.759	Up	RPT2	13.9	60.6	48.099	11	8	8	2	7	2	4	8	3	4	8	3	27190000	74999000	39144000	0.577	1.592	0.831
F4I982	GYF domain-containing protein OS=Arabidopsis thaliana GN=At1g24300 PE=1 SV=1	0.809	Down	At1g24300	2.5	165.68	14.062	4	2	1	1	1	2	2	2	2	1	1	1	18520000	14978000	19639000	1.046	0.846	1.109
O04310	Jacalin-related lectin 34 OS=Arabidopsis thaliana GN=JAL34 PE=1 SV=1	0.673	Down	JAL34	21.1	72.473	104.21	23	11	11	10	4	9	10	8	10	10	8	10	259700000	174690000	229750000	1.173	0.789	1.038
Q8RWT8	Serine--tRNA ligase, chloroplastic/mitochondrial OS=Arabidopsis thaliana GN=OVA7 PE=2 SV=1	0.82	Down	OVA7	28.4	57.351	79.259	21	10	10	9	5	7	10	8	10	10	8	10	152650000	125110000	142760000	1.089	0.893	1.018
Q8L4B2	Nuclear transcription factor Y subunit C-9 OS=Arabidopsis thaliana GN=NFYC9 PE=1 SV=1	1.723	Up	NFYC9	19.9	25.639	33.004	11	4	3	4	4	3	4	4	4	3	3	3	58025000	100010000	56386000	0.812	1.399	0.789
Q8GYJ9	HISTIDINE TRIAD NUCLEOTIDE-BINDING 2 OS=Arabidopsis thaliana GN=HINT 2 PE=2 SV=1	1.375	Up	HINT	21.9	20.4	29.803	6	3	3	2	3	1	1	2	2	1	2	2	24289000	33408000	18707000	0.954	1.312	0.735
Q9LTR2	Protein TRIGALACTOSYLDIACYLGLYCEROL 2, chloroplastic OS=Arabidopsis thaliana GN=TGD2 PE=1 SV=1	0.824	Down	TGD2	24.1	41.63	86.632	19	8	8	6	6	7	8	8	8	8	8	8	141890000	116850000	165620000	1.003	0.826	1.171
Q9LS03	Allene oxide cyclase 1, chloroplastic OS=Arabidopsis thaliana GN=AOC1 PE=1 SV=1	0.594	Down	AOC1	37.8	27.801	45.393	10	8	3	4	4	2	8	8	8	3	3	3	406450000	241090000	471030000	1.09	0.647	1.263
Q9FFW8	Tryptophan synthase beta chain OS=Arabidopsis thaliana GN=TSBtype2 PE=2 SV=1	2.061	Up	TSBtype2	11.7	55.741	33.48	10	4	4	4	4	2	4	4	4	4	4	4	38333000	79038000	45365000	0.707	1.457	0.836
Q8LB02	Succinate dehydrogenase [ubiquinone] iron-sulfur subunit 2, mitochondrial OS=Arabidopsis thaliana GN=SDH2-2 PE=1 SV=2	1.514	Up	SDH2-2	26.1	31.141	50.728	21	7	1	8	6	7	7	7	6	1	1	1	103860000	157190000	140860000	0.775	1.173	1.051
Q9FRL3	Sugar transporter ERD6-like 6 OS=Arabidopsis thaliana GN=At1g75220 PE=1 SV=1	0.753	Down	At1g75220	4.1	52.901	18.284	6	2	2	2	2	2	2	2	2	2	2	2	20977000	15783000	30032000	0.942	0.709	1.349
Q9FZH0	60S ribosomal protein L35a-2 OS=Arabidopsis thaliana GN=RPL35AB PE=3 SV=1	1.368	Up	RPL35AB	18	12.799	21.607	6	2	2	1	3	2	2	2	2	2	2	2	122270000	167370000	275780000	0.649	0.888	1.463
P48001	Homeobox protein knotted-1-like 4 OS=Arabidopsis thaliana GN=KNAT4 PE=1 SV=3	1.448	Up	KNAT4	8.4	44.385	22.746	7	3	3	2	2	3	2	3	3	2	3	3	22169000	32088000	19806000	0.898	1.3	0.802
Q94AR8	3-isopropylmalate dehydratase large subunit, chloroplastic OS=Arabidopsis thaliana GN=IIL1 PE=1 SV=1	1.244	Up	IIL1	36.3	55.013	123.12	29	13	13	9	10	10	12	12	11	12	12	11	179950000	224000000	242110000	0.836	1.04	1.124
Q9C891	Dirigent protein 20 OS=Arabidopsis thaliana GN=DIR20 PE=2 SV=1	1.692	Up	DIR20	12.3	20.618	14.103	4	2	2	1	1	2	2	2	2	2	2	2	124430000	210430000	131190000	0.801	1.355	0.844
Q9FMF1	AT5g64380/MSJ1_22 OS=Arabidopsis thaliana GN=MSJ1.22 PE=2 SV=1	0.749	Down	MSJ1.22	29	43.975	67.756	14	9	9	7	3	4	8	9	9	8	9	9	121390000	90925000	114890000	1.113	0.834	1.053
P21216	Soluble inorganic pyrophosphatase 2 OS=Arabidopsis thaliana GN=PPA2 PE=2 SV=2	0.619	Down	PPA2	40.4	24.671	51.517	16	7	5	5	5	6	7	6	7	5	4	5	360640000	223500000	296400000	1.229	0.761	1.01
Q9C9W5	Glycerate dehydrogenase HPR, peroxisomal OS=Arabidopsis thaliana GN=HPR PE=1 SV=1	0.562	Down	HPR	92.7	42.247	323.31	190	34	34	68	62	60	32	33	32	32	33	32	15659000000	8804300000	12439000000	1.273	0.716	1.011
Q9SWG0	Isovaleryl-CoA dehydrogenase, mitochondrial OS=Arabidopsis thaliana GN=IVD PE=1 SV=2	0.738	Down	IVD	34.2	44.773	103.48	28	11	11	11	9	8	11	10	10	11	10	10	387260000	285910000	305490000	1.187	0.876	0.936
P34066	Proteasome subunit alpha type-1-A OS=Arabidopsis thaliana GN=PAF1 PE=1 SV=3	1.302	Up	PAF1	58.6	30.476	203.65	53	13	4	19	16	18	13	13	12	4	4	4	772900000	1006200000	841230000	0.885	1.152	0.963
Q8GW48	At4g15810 OS=Arabidopsis thaliana GN=HSBP PE=2 SV=1	2.189	Up	HSBP	29.1	9.3472	13.741	8	2	2	3	3	2	2	2	2	2	2	2	43313000	94844000	54094000	0.676	1.48	0.844
Q9LYW9	DnaJ protein P58IPK homolog OS=Arabidopsis thaliana GN=P58IPK PE=1 SV=1	1.899	Up	P58IPK	12	53.689	41.22	6	5	5	1	4	1	3	5	2	3	5	2	15278000	29004000	13651000	0.791	1.502	0.707
F4JF64	Clp ATPase OS=Arabidopsis thaliana GN=HSP93-III PE=3 SV=1	1.598	Up	HSP93-III	36.6	102.24	17.27	5	30	3	1	2	2	29	30	29	2	3	3	8792500	14060000	16120000	0.677	1.082	1.241
Q93ZS6	AT3g05090/T12H1_5 OS=Arabidopsis thaliana GN=LRS1 PE=1 SV=1	1.416	Up	LRS1	4.4	82.196	21.912	6	3	3	2	3	1	3	3	2	3	3	2	9949200	14080000	9007500	0.903	1.279	0.818
Q6NMZ4	At4g34412 OS=Arabidopsis thaliana GN=At4g34412 PE=2 SV=1	2.9	Up	At4g34412	20.3	18.826	19.325	5	3	3	1	3	1	2	3	2	2	3	2	10122000	29349000	13051000	0.578	1.676	0.745
Q7XA63	At5g19860 OS=Arabidopsis thaliana GN=At5g19860 PE=2 SV=1	1.668	Up	At5g19860	33.1	20.443	68.037	10	4	4	3	5	2	4	4	4	4	4	4	152610000	254490000	159270000	0.808	1.348	0.844
P43287	Aquaporin PIP2-2 OS=Arabidopsis thaliana GN=PIP2-2 PE=1 SV=2	0.469	Down	PIP2-2	17.5	30.453	31.611	8	5	4	2	1	5	4	4	5	3	3	4	156610000	73376000	196900000	1.101	0.516	1.384
Q9XIN6	At2g27290 OS=Arabidopsis thaliana GN=At2g27290 PE=2 SV=1	1.446	Up	At2g27290	13.9	21.76	16.577	4	2	2	1	3	0	2	2	1	2	2	1	12222000	17683000	11446000	0.887	1.283	0.83
F4INW2	Winged-helix DNA-binding transcription factor family protein OS=Arabidopsis thaliana GN=At2g30620 PE=1 SV=1	0.715	Down	At2g30620	28.7	21.549	54.264	15	6	6	6	4	5	5	4	5	5	4	5	162990000	116570000	157590000	1.119	0.8	1.081
Q9FIX1	AIG2-like protein B OS=Arabidopsis thaliana GN=AIG2LB PE=1 SV=1	2.116	Up	AIG2LB	67.4	20.017	167.39	22	9	9	6	10	6	7	9	7	7	9	7	617080000	1306400000	469370000	0.774	1.638	0.588
Q8VZ57	Alpha/beta-Hydrolases superfamily protein OS=Arabidopsis thaliana GN=At1g52510 PE=2 SV=1	0.799	Down	At1g52510	43.9	41.839	225.48	40	13	13	14	13	13	12	12	13	12	12	13	808580000	645280000	787850000	1.082	0.864	1.054
Q8H183	Beta-ureidopropionase OS=Arabidopsis thaliana GN=PYD3 PE=1 SV=1	1.684	Up	PYD3	25	45.552	67.919	16	7	7	4	7	5	5	7	5	5	7	5	80368000	135350000	96656000	0.772	1.3	0.928
P56805	30S ribosomal protein S15, chloroplastic OS=Arabidopsis thaliana GN=rps15 PE=3 SV=1	0.817	Down	rps15	51.1	10.718	33.836	13	5	5	4	4	5	5	5	5	5	5	5	136120000	111100000	168590000	0.982	0.802	1.216
Q9FLP6	Small ubiquitin-related modifier 2 OS=Arabidopsis thaliana GN=SUMO2 PE=1 SV=1	1.648	Up	SUMO2	53.4	11.654	57.691	21	6	2	6	9	6	6	6	6	2	2	2	500160000	824150000	485580000	0.829	1.366	0.805
Q9LJ94	Putative uncharacterized protein At3g22520 OS=Arabidopsis thaliana GN=At3g22520 PE=1 SV=1	2.003	Up	At3g22520	18.5	67.57	70.665	17	10	10	3	10	4	7	10	9	7	10	9	50952000	101980000	55529000	0.733	1.468	0.799
F4JPR7	Plant UBX domain-containing protein 8 OS=Arabidopsis thaliana GN=PUX8 PE=1 SV=1	1.572	Up	PUX8	19.5	62.349	74.949	16	9	8	4	8	4	8	8	9	7	7	8	97537000	153400000	85895000	0.869	1.366	0.765
Q9S834	ATP-dependent Clp protease proteolytic subunit 5, chloroplastic OS=Arabidopsis thaliana GN=CLPP5 PE=1 SV=1	1.216	Up	CLPP5	25.2	32.356	57.351	16	5	5	4	6	6	5	5	5	5	5	5	272130000	330920000	345740000	0.86	1.046	1.093
Q93VC9	Cathepsin B-like protease 2 OS=Arabidopsis thaliana GN=CATHB2 PE=2 SV=1	0.775	Down	CATHB2	28.7	40.033	72.227	22	8	8	7	8	7	8	8	7	8	8	7	278240000	215520000	280010000	1.079	0.836	1.086
Q9LHA6	AT3g28220/T19D11_3 OS=Arabidopsis thaliana GN=At3g28220 PE=2 SV=1	0.248	Down	At3g28220	25.9	42.886	124.76	21	10	10	9	1	11	10	8	10	10	8	10	612340000	152180000	869950000	1.124	0.279	1.597
Q9LV48	Proline-rich receptor-like protein kinase PERK1 OS=Arabidopsis thaliana GN=PERK1 PE=2 SV=1	2.039	Up	PERK1	8.4	69.271	34.488	5	4	4	0	3	2	3	4	4	3	4	4	25210000	51373000	27521000	0.726	1.48	0.793
Q9SRI1	Protein transport protein SEC13 homolog A OS=Arabidopsis thaliana GN=SEC13A PE=1 SV=1	1.227	Up	SEC13A	29.8	32.63	67.548	18	7	7	5	7	6	5	7	7	5	7	7	153620000	188470000	144120000	0.948	1.163	0.889
Q8L637	Putative uncharacterized protein At3g21140 OS=Arabidopsis thaliana GN=At3g21140 PE=2 SV=1	0.81	Down	At3g21140	4.1	42.851	12.753	3	2	2	1	0	2	2	2	2	2	2	2	25981000	21040000	30841000	1.001	0.811	1.188
Q9LEW3	Aspartyl protease AED1 OS=Arabidopsis thaliana GN=AED1 PE=2 SV=1	4.837	Up	AED1	19.6	49.473	70.887	9	6	6	2	6	1	3	6	3	3	6	3	104550000	505360000	88123000	0.449	2.172	0.379
Q05758	Ketol-acid reductoisomerase, chloroplastic OS=Arabidopsis thaliana GN=At3g58610 PE=1 SV=2	1.539	Up	At3g58610	31	63.812	175.46	51	16	16	14	18	19	16	16	15	16	16	15	1022200000	1573400000	1341700000	0.779	1.199	1.022
Q9ZQ26	AT2G24420 protein OS=Arabidopsis thaliana GN=At2g24420 PE=2 SV=2	0.749	Down	At2g24420	16.1	50.351	58.002	13	7	7	3	4	6	7	7	7	7	7	7	182340000	136390000	196250000	1.062	0.795	1.143
Q9FZC4	Berberine bridge enzyme-like 3 OS=Arabidopsis thaliana GN=FOX1 PE=2 SV=1	1.946	Up	FOX1	6.7	59.817	29.276	2	3	2	0	2	0	2	3	1	2	2	1	39003000	75857000	0	0.679	1.321
Q8LPK4	AP-2 complex subunit alpha-2 OS=Arabidopsis thaliana GN=ALPHAC-AD PE=1 SV=1	1.277	Up	ALPHAC-AD	8.4	112.3	69.862	10	6	6	4	4	2	6	6	6	6	6	6	78044000	99636000	70602000	0.943	1.204	0.853
Q9LSA3	60S ribosomal protein L30-3 OS=Arabidopsis thaliana GN=RPL30C PE=3 SV=1	0.81	Down	RPL30C	35.7	12.279	34.876	12	5	2	4	4	4	5	5	5	2	2	2	317280000	256890000	314540000	1.071	0.867	1.062
Q9FFE6	Probable acyl-activating enzyme 5, peroxisomal OS=Arabidopsis thaliana GN=AAE5 PE=2 SV=1	1.39	Up	AAE5	12.3	60.769	39.786	7	4	4	1	4	2	3	4	3	3	4	3	42138000	58535000	39586000	0.901	1.252	0.847
Q94AK9	2Fe-2S ferredoxin-like superfamily protein OS=Arabidopsis thaliana GN=At4g32590 PE=2 SV=1	0.819	Down	At4g32590	8.7	18.663	14.471	4	2	2	2	1	1	2	2	2	2	2	2	42262000	34600000	31754000	1.167	0.956	0.877
Q9S9P8	Ferredoxin--NADP reductase, root isozyme 2, chloroplastic OS=Arabidopsis thaliana GN=RFNR2 PE=1 SV=1	1.241	Up	RFNR2	31.7	42.789	37.963	8	13	6	1	5	2	9	12	10	4	5	4	63177000	78364000	61291000	0.934	1.159	0.907
Q9SIQ8	AT2G31490 protein OS=Arabidopsis thaliana GN=At2g31490 PE=2 SV=1	1.396	Up	At2g31490	43.7	8.2914	17.68	3	3	3	1	1	1	3	3	3	3	3	3	43001000	59985000	45551000	0.868	1.212	0.92
Q94K71	CBBY-like protein OS=Arabidopsis thaliana GN=CBBY PE=1 SV=1	0.595	Down	CBBY	44.2	34.245	126.59	48	14	14	18	14	16	14	13	13	14	13	13	2396900000	1425000000	1901900000	1.256	0.747	0.997
Q8L4N1	Universal stress protein PHOS34 OS=Arabidopsis thaliana GN=PHOS34 PE=1 SV=1	1.443	Up	PHOS34	40	28.106	77.417	17	8	6	4	8	5	8	7	7	6	5	5	113190000	163270000	111170000	0.876	1.264	0.86
Q9ZP06	Malate dehydrogenase 1, mitochondrial OS=Arabidopsis thaliana GN=At1g53240 PE=1 SV=1	0.815	Down	At1g53240	44.6	35.804	323.31	72	14	6	23	25	24	13	13	14	5	5	6	5812800000	4733000000	5060700000	1.117	0.91	0.973
Q9FWR5	Gamma carbonic anhydrase 1, mitochondrial OS=Arabidopsis thaliana GN=GAMMACA1 PE=1 SV=1	0.712	Down	GAMMACA1	37.1	29.971	47.042	14	7	5	6	4	4	7	7	7	5	5	5	198320000	141220000	158810000	1.194	0.85	0.956
F4ISU2	Early endosome antigen OS=Arabidopsis thaliana GN=At2g32240 PE=1 SV=1	1.374	Up	At2g32240	47.7	148.61	323.31	132	57	57	44	53	35	55	55	51	55	55	51	1057600000	1453200000	1097100000	0.879	1.208	0.912
Q8LAS7	Calcineurin B-like protein 2 OS=Arabidopsis thaliana GN=CBL2 PE=1 SV=2	0.764	Down	CBL2	13.7	25.809	18.859	7	3	3	2	2	3	3	3	3	3	3	3	16973000	12957000	19783000	1.024	0.782	1.194
Q43127	Glutamine synthetase, chloroplastic/mitochondrial OS=Arabidopsis thaliana GN=GLN2 PE=1 SV=1	0.825	Down	GLN2	68.4	47.41	323.31	224	27	25	77	71	76	27	26	26	25	24	24	43163000000	35603000000	33482000000	1.154	0.952	0.895
O64750	Protein EMBRYO SAC DEVELOPMENT ARREST 3, chloroplastic OS=Arabidopsis thaliana GN=EDA3 PE=1 SV=1	1.522	Up	EDA3	18.3	19.942	68.176	9	2	2	3	4	2	2	2	1	2	2	1	39231000	59690000	0	0.793	1.207
Q9SD45	AT3g51000/F24M12_40 OS=Arabidopsis thaliana GN=F24M12.40 PE=2 SV=1	1.485	Up	F24M12.40	21.4	36.701	39.194	6	5	5	2	3	1	5	5	4	5	5	4	84865000	125960000	80980000	0.872	1.295	0.833
Q9FNH6	NDR1/HIN1-like protein 3 OS=Arabidopsis thaliana GN=NHL3 PE=1 SV=1	3.346	Up	NHL3	21.2	25.947	28.823	7	4	4	2	4	1	3	4	2	3	4	2	97357000	325930000	63053000	0.601	2.011	0.389
Q94A94	Diaminopimelate decarboxylase 2, chloroplastic OS=Arabidopsis thaliana GN=LYSA2 PE=1 SV=1	1.249	Up	LYSA2	26.6	54.163	114.32	23	12	12	7	8	8	12	12	11	12	12	11	194870000	243470000	234640000	0.869	1.085	1.046
Q42605	Bifunctional UDP-glucose 4-epimerase and UDP-xylose 4-epimerase 1 OS=Arabidopsis thaliana GN=UGE1 PE=1 SV=2	1.952	Up	UGE1	28.8	39.157	91.706	15	8	6	2	11	2	7	8	7	5	6	5	70374000	137380000	79113000	0.736	1.437	0.827
Q93Z10	AT5g11580/F15N18_170 OS=Arabidopsis thaliana GN=At5g11580 PE=2 SV=1	0.711	Down	At5g11580	8	60.542	23.91	3	3	3	1	1	1	2	2	2	2	2	2	14175000	10086000	0	1.169	0.831
Q94F20	At5g25460 OS=Arabidopsis thaliana GN=DGR2 PE=2 SV=1	0.615	Down	DGR2	37.9	39.978	47.271	22	12	6	7	6	9	9	9	12	5	5	6	400600000	246260000	478010000	1.068	0.657	1.275
F4JKZ9	Uncharacterized protein OS=Arabidopsis thaliana GN=At4g16060 PE=1 SV=1	0.649	Down	At4g16060	28.7	32.725	56.036	15	8	8	5	6	4	8	8	8	8	8	8	271930000	176580000	239060000	1.186	0.77	1.043
Q9LKU2	Sec-independent protein translocase protein TATA, chloroplastic OS=Arabidopsis thaliana GN=TATA PE=1 SV=1	1.261	Up	TATA	24.5	15.713	170.98	9	3	3	3	4	2	3	3	2	3	3	2	125620000	158410000	112170000	0.951	1.199	0.849
Q7XJE6	Metacaspase-1 OS=Arabidopsis thaliana GN=AMC1 PE=1 SV=1	2.417	Up	AMC1	5.2	39.792	11.168	2	2	2	0	2	0	2	2	2	2	2	2	10560000	25536000	7076100	0.734	1.774	0.492
Q9LNU4	26S proteasome non-ATPase regulatory subunit 3 homolog A OS=Arabidopsis thaliana GN=RPN3A PE=1 SV=3	1.231	Up	RPN3A	17.6	55.582	63.987	15	7	2	3	6	6	6	7	7	2	2	2	62574000	77029000	80204000	0.854	1.051	1.095
O04487	Probable elongation factor 1-gamma 1 OS=Arabidopsis thaliana GN=At1g09640 PE=1 SV=1	0.8	Down	At1g09640	51.2	46.66	118.17	38	20	10	12	13	13	20	20	19	10	10	10	1407300000	1126000000	1280900000	1.107	0.886	1.007
O65469	Putative cysteine-rich receptor-like protein kinase 9 OS=Arabidopsis thaliana GN=CRK9 PE=5 SV=1	1.39	Up	CRK9	32.8	29.722	188.7	21	6	3	8	7	6	6	6	6	3	3	3	880930000	1224300000	811810000	0.906	1.259	0.835
Q9FN42	ATP-dependent Clp protease proteolytic subunit 2, mitochondrial OS=Arabidopsis thaliana GN=CLPP2 PE=1 SV=1	1.381	Up	CLPP2	25.3	26.283	98.981	12	4	4	4	4	4	4	4	4	4	4	4	195420000	269700000	227530000	0.846	1.168	0.985
O23255	Adenosylhomocysteinase 1 OS=Arabidopsis thaliana GN=SAHH1 PE=1 SV=1	1.622	Up	SAHH1	61	53.378	207.17	65	25	9	17	28	20	22	25	24	9	9	9	2027800000	3290400000	2927300000	0.738	1.197	1.065
Q9LVI6	Probable inactive receptor kinase RLK902 OS=Arabidopsis thaliana GN=RLK902 PE=1 SV=1	1.342	Up	RLK902	8.2	70.405	25.798	6	5	4	1	4	1	4	5	3	4	4	3	17149000	23030000	19514000	0.862	1.157	0.981
O64835	At2g23670/F26B6.32 OS=Arabidopsis thaliana GN=YCF37 PE=2 SV=1	1.269	Up	YCF37	11.4	17.078	46.792	12	3	3	4	4	4	3	3	3	3	3	3	107980000	136980000	113650000	0.903	1.146	0.951
O04309	Jacalin-related lectin 35 OS=Arabidopsis thaliana GN=JAL35 PE=1 SV=1	0.47	Down	JAL35	77.8	48.496	323.31	83	24	23	34	20	29	23	22	23	22	21	22	2649600000	1244500000	3113600000	1.134	0.533	1.333
Q9SKC9	NADH dehydrogenase [ubiquinone] 1 beta subcomplex subunit 7 OS=Arabidopsis thaliana GN=At2g02050 PE=3 SV=1	1.819	Up	At2g02050	52.4	11.74	30.152	6	5	5	1	4	1	3	4	4	3	4	4	14874000	27083000	14415000	0.792	1.441	0.767
O04663	Eukaryotic translation initiation factor isoform 4E OS=Arabidopsis thaliana GN=EIF(ISO)4E PE=1 SV=2	1.389	Up	EIF(ISO)4E	47	22.514	85.687	18	9	9	7	9	2	7	8	6	7	8	6	106860000	148540000	89390000	0.93	1.292	0.778
A8MS55	Nuclear transport factor 2B OS=Arabidopsis thaliana GN=NTF2B PE=1 SV=1	1.663	Up	NTF2B	32.8	15.004	27.12	12	4	4	4	5	3	4	4	4	4	4	4	122930000	204400000	131950000	0.803	1.335	0.862
Q9FI53	Fumarate hydratase 2, chloroplastic OS=Arabidopsis thaliana GN=FUM2 PE=2 SV=1	0.465	Down	FUM2	56.1	54.083	238.64	47	21	11	21	10	16	21	17	18	11	11	11	1005000000	467340000	926090000	1.257	0.585	1.158
Q9SLV3	At1g58270/F19C14_8 OS=Arabidopsis thaliana GN=ZW9 PE=2 SV=1	0.255	Down	ZW9	19.4	45.035	104.9	21	8	8	8	5	8	7	6	8	7	6	8	554070000	141610000	787340000	1.121	0.286	1.593
Q9M9S3	Single-stranded DNA-binding protein WHY1, chloroplastic OS=Arabidopsis thaliana GN=WHY1 PE=1 SV=1	1.475	Up	WHY1	19.8	29.058	15.314	6	4	2	2	2	2	4	4	4	2	2	2	46366000	68374000	41688000	0.889	1.311	0.799
Q5XEP2	Hsp70-Hsp90 organizing protein 2 OS=Arabidopsis thaliana GN=HOP2 PE=1 SV=1	1.474	Up	HOP2	45.7	64.519	284.06	55	24	20	18	25	12	22	24	23	18	20	19	531330000	782630000	509560000	0.874	1.288	0.838
Q5GM68	Phosphoenolpyruvate carboxylase 2 OS=Arabidopsis thaliana GN=PPC2 PE=1 SV=2	1.23	Up	PPC2	63.3	109.75	323.31	202	55	33	64	74	64	52	54	51	31	33	31	4938100000	6074900000	5433100000	0.901	1.108	0.991
Q9LUV2	Stress-response A/B barrel domain-containing protein HS1 OS=Arabidopsis thaliana GN=HS1 PE=1 SV=1	1.361	Up	HS1	74.3	12.184	97.453	13	5	5	4	5	4	5	5	4	5	5	4	230150000	313260000	249680000	0.871	1.185	0.944
Q8GUM2	Heat shock 70 kDa protein 9, mitochondrial OS=Arabidopsis thaliana GN=HSP70-9 PE=2 SV=1	1.204	Up	HSP70-9	28.9	73.074	168.29	34	20	14	11	14	9	18	20	18	12	14	13	329010000	396320000	286170000	0.976	1.175	0.849
Q9ZVS4	Eukaryotic aspartyl protease family protein OS=Arabidopsis thaliana GN=At1g03220 PE=2 SV=1	0.714	Down	At1g03220	29.8	45.717	49.481	6	10	6	3	1	2	9	8	9	5	4	5	116100000	82893000	141260000	1.024	0.731	1.245
Q93WG3	Chloroplast J-like domain 1 OS=Arabidopsis thaliana GN=CJD1 PE=1 SV=1	0.811	Down	CJD1	11.6	32.902	22.681	11	3	3	4	4	3	3	3	3	3	3	3	95956000	77798000	92331000	1.082	0.877	1.041
P56772	Chloroplastic ATP-dependent Clp protease proteolytic subunit 1 OS=Arabidopsis thaliana GN=clpP1 PE=1 SV=2	1.291	Up	clpP1	32.1	22.123	116.06	18	4	4	6	6	6	4	4	4	4	4	4	291820000	376970000	350730000	0.859	1.109	1.032
Q94JQ7	At1g07830/F24B9_7 OS=Arabidopsis thaliana GN=At1g07830 PE=1 SV=1	0.809	Down	At1g07830	18.1	16.886	15.922	4	2	2	1	2	1	2	2	2	2	2	2	10674000	8624600	12779000	0.998	0.807	1.195
A0A1P8B1B5	Glycine-rich protein 3 short isoform OS=Arabidopsis thaliana GN=GRP3S PE=4 SV=1	0.185	Down	GRP3S	22.7	13.363	82.422	18	2	2	5	4	9	2	2	2	2	2	2	259260000	47482000	3116500000	0.227	0.042	2.731
Q53YF3	Signal peptidase complex subunit 3B OS=Arabidopsis thaliana GN=At5g27430 PE=2 SV=1	1.223	Up	At5g27430	9.6	19.218	11.931	5	2	2	2	1	2	2	2	2	2	2	2	10438000	12765000	10544000	0.928	1.135	0.937
Q9C9Z6	AT3g08600/F17O14_7 OS=Arabidopsis thaliana GN=F17O14.7 PE=2 SV=1	0.545	Down	F17O14.7	14.6	34.732	37.849	11	5	5	5	3	3	5	4	4	5	4	4	101100000	55098000	95693000	1.204	0.656	1.14
O80480	Importin subunit alpha-4 OS=Arabidopsis thaliana GN=IMPA4 PE=1 SV=1	1.438	Up	IMPA4	20.6	59.445	52.817	11	8	5	3	4	4	6	7	8	4	5	5	61615000	88625000	55360000	0.899	1.293	0.808
Q9SPE6	Alpha-soluble NSF attachment protein 2 OS=Arabidopsis thaliana GN=ASNAP2 PE=1 SV=1	1.622	Up	ASNAP2	48.4	32.755	103.42	26	11	11	7	12	7	8	11	11	8	11	11	140040000	227020000	147080000	0.817	1.325	0.858
A0A1P8B2S3	UDP-glucosyl transferase 74D1 OS=Arabidopsis thaliana GN=UGT74D1 PE=4 SV=1	0.773	Down	UGT74D1	16.1	54.919	53.235	12	5	5	4	2	6	5	5	5	5	5	5	54456000	42073000	53612000	1.088	0.841	1.071
Q94C86	Pectin lyase-like superfamily protein OS=Arabidopsis thaliana GN=At3g16850 PE=2 SV=1	0.784	Down	At3g16850	21.8	49.124	110.29	28	9	9	10	9	9	8	7	8	8	7	8	308220000	241560000	316870000	1.067	0.836	1.097
Q0WNJ6	Clathrin heavy chain 1 OS=Arabidopsis thaliana GN=CHC1 PE=1 SV=1	1.444	Up	CHC1	22.4	193.24	22.326	5	30	3	1	2	2	29	30	30	3	3	3	33225000	47959000	46538000	0.78	1.126	1.093
Q94AI7	Protein TOPLESS OS=Arabidopsis thaliana GN=TPL PE=1 SV=1	1.938	Up	TPL	17.8	124.3	136.28	35	18	3	12	13	10	15	18	15	3	3	3	160160000	310160000	203180000	0.713	1.382	0.905
Q9SX77	Succinate dehydrogenase subunit 5, mitochondrial OS=Arabidopsis thaliana GN=SDH5 PE=1 SV=1	1.215	Up	SDH5	44	28.106	112.17	33	9	9	10	13	10	8	9	9	8	9	9	645840000	784560000	609230000	0.95	1.154	0.896
Q9SMN1	Gamma carbonic anhydrase-like 2, mitochondrial OS=Arabidopsis thaliana GN=GAMMACAL2 PE=1 SV=1	0.564	Down	GAMMACAL2	37.1	27.956	19.199	6	7	2	1	3	2	7	7	6	2	2	2	96010000	54215000	87767000	1.21	0.683	1.106
Q9SCL7	Acetylglutamate kinase, chloroplastic OS=Arabidopsis thaliana GN=NAGK PE=1 SV=1	0.815	Down	NAGK	36.6	36.595	87.71	19	8	8	6	6	7	7	8	8	7	8	8	415820000	339010000	321040000	1.159	0.945	0.895
Q9SZE1	Probable 3-hydroxyisobutyrate dehydrogenase-like 1, mitochondrial OS=Arabidopsis thaliana GN=At4g29120 PE=1 SV=1	0.688	Down	At4g29120	32	35.371	129.29	20	10	10	8	5	7	9	8	9	9	8	9	192860000	132730000	189700000	1.123	0.773	1.104
Q8H107	Dihydrolipoyllysine-residue succinyltransferase component of 2-oxoglutarate dehydrogenase complex 2, mitochondrial OS=Arabidopsis thaliana GN=At4g26910 PE=1 SV=2	0.776	Down	At4g26910	27.8	50.059	103.57	20	11	5	7	7	6	11	11	11	5	5	5	538850000	418000000	473490000	1.13	0.877	0.993
Q4V3D1	At1g48620 OS=Arabidopsis thaliana GN=HON5 PE=1 SV=1	2.009	Up	HON5	18.6	51.391	84.346	8	5	5	3	3	2	4	4	3	4	4	3	29961000	60143000	19577000	0.819	1.645	0.535
Q9SIM4	60S ribosomal protein L14-1 OS=Arabidopsis thaliana GN=RPL14A PE=2 SV=1	0.784	Down	RPL14A	43.3	15.506	12.089	5	7	2	2	2	1	7	7	7	2	2	2	68467000	53650000	63135000	1.109	0.869	1.022
Q9FKK1	Protein transport protein Sec61 subunit beta OS=Arabidopsis thaliana GN=MUF9.9 PE=2 SV=1	0.462	Down	MUF9.9	31.2	10.865	39.016	6	3	3	3	2	1	3	3	3	3	3	3	50315000	23223000	58977000	1.139	0.526	1.335
Q9XGX9	Mitochondrial import inner membrane translocase subunit TIM9 OS=Arabidopsis thaliana GN=TIM9 PE=1 SV=2	1.371	Up	TIM9	65.6	10.715	70.385	15	5	5	4	7	4	5	5	5	5	5	5	118900000	162960000	129350000	0.867	1.189	0.944
F4JD96	Ribosomal protein L13 family protein OS=Arabidopsis thaliana GN=At3g07110 PE=3 SV=1	1.434	Up	At3g07110	36.2	23.594	25.575	6	7	2	2	2	2	6	5	7	1	1	2	90848000	130270000	155500000	0.724	1.038	1.239
Q96242	Allene oxide synthase, chloroplastic OS=Arabidopsis thaliana GN=CYP74A PE=1 SV=3	0.696	Down	CYP74A	69.7	58.196	323.31	129	34	34	47	37	45	34	33	33	34	33	33	6689600000	4657500000	7320700000	1.075	0.748	1.176
Q9SEI3	26S proteasome regulatory subunit 10B homolog A OS=Arabidopsis thaliana GN=RPT4A PE=1 SV=1	1.244	Up	RPT4A	52.4	44.816	167.07	42	18	1	11	17	14	18	18	17	1	1	1	368160000	457770000	407830000	0.895	1.113	0.992
F4HVV7	Transcription regulator OS=Arabidopsis thaliana GN=At1g02080 PE=4 SV=1	1.367	Up	At1g02080	1.4	263.76	19.147	5	3	3	1	3	1	3	3	1	3	3	1	14408000	19702000	0	0.845	1.155
A0A178VI02	Eukaryotic aspartyl protease family protein OS=Arabidopsis thaliana GN=At3g02740 PE=3 SV=1	1.379	Up	At3g02740	12.1	44.659	29.733	12	4	4	6	3	3	4	4	4	4	4	4	68306000	94178000	77363000	0.854	1.178	0.968
P46645	Aspartate aminotransferase, cytoplasmic isozyme 1 OS=Arabidopsis thaliana GN=ASP2 PE=1 SV=2	1.394	Up	ASP2	36.8	44.266	106.08	36	13	11	12	14	10	12	13	12	10	11	10	292190000	407600000	334320000	0.848	1.182	0.97
A0A1I9LR04	Nascent polypeptide-associated complex subunit alpha-like protein 2 OS=Arabidopsis thaliana GN=NACA2 PE=1 SV=1	3.083	Up	NACA2	36.2	25.399	94.149	6	5	4	0	6	0	2	5	5	1	4	4	19315000	59576000	21212000	0.579	1.785	0.636
F4KDA6	Protein LOW PSII ACCUMULATION 2, chloroplastic OS=Arabidopsis thaliana GN=LPA2 PE=1 SV=1	0.636	Down	LPA2	20	20.213	31.744	7	3	3	1	2	4	3	3	3	3	3	3	123940000	78822000	134880000	1.101	0.7	1.198
Q9C907	Glycerophosphodiester phosphodiesterase GDPD5 OS=Arabidopsis thaliana GN=GDPD5 PE=2 SV=1	2.489	Up	GDPD5	28.3	45.021	115.68	21	10	9	3	12	6	9	10	9	8	9	8	168080000	418480000	129910000	0.704	1.752	0.544
Q94K97	30S ribosomal protein OS=Arabidopsis thaliana GN=At5g24490 PE=1 SV=1	1.218	Up	At5g24490	16.6	34.856	135.92	29	7	7	9	12	8	6	7	7	6	7	7	655120000	797740000	779480000	0.88	1.072	1.048
Q9FR44	Phosphoethanolamine N-methyltransferase 1 OS=Arabidopsis thaliana GN=NMT1 PE=1 SV=1	0.536	Down	NMT1	22.6	56.102	33.222	9	9	1	3	3	3	9	9	9	1	1	1	106360000	56964000	106780000	1.181	0.633	1.186
O49485	D-3-phosphoglycerate dehydrogenase 1, chloroplastic OS=Arabidopsis thaliana GN=PGDH1 PE=1 SV=1	0.742	Down	PGDH1	43.1	63.324	188.8	57	20	17	20	18	19	20	20	19	17	17	16	1119600000	830350000	1072200000	1.111	0.824	1.064
Q9LX13	(3R)-hydroxymyristoyl-[acyl carrier protein] dehydratase-like protein OS=Arabidopsis thaliana GN=At5g10160 PE=2 SV=1	0.644	Down	At5g10160	38.8	24.123	60.495	19	7	5	6	4	9	7	7	7	5	5	5	501630000	322990000	457100000	1.174	0.756	1.07
Q9FH02	ATP-dependent zinc metalloprotease FTSH 5, chloroplastic OS=Arabidopsis thaliana GN=FTSH5 PE=1 SV=1	0.83	Down	FTSH5	59.9	75.231	164.46	63	36	11	22	18	23	36	35	36	11	11	11	1022700000	848290000	923030000	1.098	0.911	0.991
O80439	30S ribosomal protein S31, chloroplastic OS=Arabidopsis thaliana GN=RPS31 PE=1 SV=1	1.26	Up	RPS31	15.3	12.783	12.64	13	2	2	4	4	5	2	2	2	2	2	2	91643000	115410000	95312000	0.909	1.145	0.946
Q93WN0	Selenium-binding protein 2 OS=Arabidopsis thaliana GN=SBP2 PE=1 SV=1	0.745	Down	SBP2	23.8	53.937	50.815	8	8	4	3	2	3	8	8	8	4	4	4	94234000	70215000	99871000	1.07	0.797	1.134
F4K9Y6	Phosphoglycerate/bisphosphoglycerate mutase family protein OS=Arabidopsis thaliana GN=MDJ22.4 PE=4 SV=1	0.746	Down	MDJ22.4	33.5	50.805	116.85	26	12	12	7	9	10	11	12	12	11	12	12	222560000	166100000	210150000	1.115	0.832	1.053
A0A1P8AXX8	Uncharacterized protein OS=Arabidopsis thaliana GN=At2g34310 PE=1 SV=1	0.807	Down	At2g34310	20.9	25.295	52.958	12	5	5	5	4	3	5	5	4	5	5	4	35536000	28690000	47074000	0.958	0.773	1.269
Q9LF79	Calcium-transporting ATPase 8, plasma membrane-type OS=Arabidopsis thaliana GN=ACA8 PE=1 SV=1	0.573	Down	ACA8	4.2	116.17	33.248	6	4	4	2	0	4	3	2	3	3	2	3	37002000	21190000	44483000	1.081	0.619	1.3
P57681	Farnesylcysteine lyase OS=Arabidopsis thaliana GN=FLCY PE=1 SV=1	1.234	Up	FLCY	13.8	55.297	40.473	11	5	5	4	4	3	4	5	4	4	5	4	36008000	44423000	38894000	0.905	1.117	0.978
A0A1P8AZB4	Beta-galactosidase OS=Arabidopsis thaliana GN=BGAL8 PE=3 SV=1	0.686	Down	BGAL8	32.2	77.06	182	31	15	14	11	8	12	14	13	14	13	12	13	262510000	180050000	254610000	1.13	0.775	1.096
B3H4S6	Dicarboxylate transporter 1 OS=Arabidopsis thaliana GN=DiT1 PE=4 SV=1	0.82	Down	DiT1	6.1	59.026	20.364	9	3	3	3	3	3	3	3	3	3	3	3	160120000	131330000	101960000	1.221	1.001	0.778
F4HWU0	Protein kinase superfamily protein OS=Arabidopsis thaliana GN=At1g48210 PE=3 SV=1	2.339	Up	At1g48210	19.8	39.589	23.748	4	7	2	0	3	1	5	6	5	1	2	0	15857000	37081000	0	0.599	1.401
Q9FE18	Peptidyl-prolyl cis-trans isomerase OS=Arabidopsis thaliana GN=At1g26550 PE=2 SV=1	1.55	Up	At1g26550	23.9	14.857	28.029	11	4	4	4	4	3	4	4	4	4	4	4	105110000	162840000	99962000	0.857	1.328	0.815
Q9LRX8	60S ribosomal protein L13a-2 OS=Arabidopsis thaliana GN=RPL13AB PE=2 SV=1	1.26	Up	RPL13AB	36.9	23.459	51.524	21	8	3	8	6	7	8	7	7	3	2	3	320140000	403490000	557530000	0.75	0.945	1.306
Q9MAH3	Protein DJ-1 homolog B OS=Arabidopsis thaliana GN=DJ1B PE=1 SV=1	0.814	Down	DJ1B	38.4	46.99	150.61	32	13	13	10	10	12	12	13	12	12	13	12	679210000	552760000	586750000	1.12	0.912	0.968
O23710	Proteasome subunit beta type-7-A OS=Arabidopsis thaliana GN=PBB1 PE=1 SV=2	1.342	Up	PBB1	20.5	29.555	44.478	20	7	7	9	5	6	7	7	7	7	7	7	344210000	461700000	401990000	0.855	1.147	0.998
A0A1P8B7H0	Beta-amylase OS=Arabidopsis thaliana GN=BAM5 PE=3 SV=1	1.956	Up	BAM5	9.9	50.142	23.223	6	3	3	1	3	2	2	3	3	2	3	3	5187800	10145000	12154000	0.566	1.107	1.327
Q9C658	Protein decapping 5 OS=Arabidopsis thaliana GN=DCP5 PE=1 SV=1	1.342	Up	DCP5	21.9	64.369	175.69	21	9	9	7	9	5	9	9	8	9	9	8	211290000	283600000	211990000	0.897	1.204	0.9
Q96500	A.thaliana mRNA (orf19) from chromosome III OS=Arabidopsis thaliana GN=CCL PE=2 SV=1	0.741	Down	CCL	33.3	15.314	140.56	25	6	6	9	8	8	6	5	5	6	5	5	681820000	505450000	879730000	0.99	0.734	1.277
A0A1P8AQY7	Golgin Putative 5 OS=Arabidopsis thaliana GN=GC5 PE=1 SV=1	1.924	Up	GC5	6.9	109.76	40.973	9	5	5	2	5	2	4	5	3	4	5	3	16833000	32393000	15523000	0.78	1.501	0.719
O22795	50S ribosomal protein L28, chloroplastic OS=Arabidopsis thaliana GN=RPL28 PE=2 SV=2	0.826	Down	RPL28	21	16.033	22.399	9	4	4	1	3	5	3	4	4	3	4	4	95629000	79035000	128890000	0.945	0.781	1.274
Q94K52	Polyketide cyclase/dehydrase and lipid transport superfamily protein OS=Arabidopsis thaliana GN=At1g02475 PE=2 SV=1	0.828	Down	At1g02475	11.9	25.037	16.595	3	3	3	2	0	1	3	3	3	3	3	3	156430000	129500000	155480000	1.063	0.88	1.057
P41377	Eukaryotic initiation factor 4A-2 OS=Arabidopsis thaliana GN=TIF4A-2 PE=1 SV=1	0.714	Down	TIF4A-2	50.5	46.762	14.215	3	18	2	1	1	1	18	17	17	2	2	1	72153000	51549000	0	1.167	0.833
Q9STY6	40S ribosomal protein S20-2 OS=Arabidopsis thaliana GN=RPS20B PE=2 SV=1	1.654	Up	RPS20B	47.5	13.693	47.967	19	6	2	6	8	5	6	6	6	2	2	2	341270000	564360000	382280000	0.795	1.315	0.89
Q9LPN5	Vacuolar protein sorting-associated protein 60.1 OS=Arabidopsis thaliana GN=VPS60-1 PE=1 SV=1	2.469	Up	VPS60-1	4.7	26.17	8.0694	4	1	1	1	2	1	1	1	1	1	1	1	5635500	13913000	4923100	0.691	1.706	0.604
Q9LFR3	Gibberellin-regulated protein 14 OS=Arabidopsis thaliana GN=GASA14 PE=1 SV=1	0.657	Down	GASA14	6.5	29.138	12.556	5	2	2	1	2	2	2	2	2	2	2	2	175350000	115210000	166940000	1.15	0.755	1.095
F4IAW5	Anthranilate synthase beta subunit 1 OS=Arabidopsis thaliana GN=ASB1 PE=4 SV=1	1.455	Up	ASB1	10	32.152	21.247	6	2	2	3	2	1	2	2	2	2	2	2	49511000	72036000	52148000	0.855	1.244	0.901
Q8L7B2	Serine carboxypeptidase-like 20 OS=Arabidopsis thaliana GN=SCPL20 PE=2 SV=2	0.556	Down	SCPL20	11.3	55.832	41.39	13	5	5	6	3	4	5	5	5	5	5	5	98138000	54537000	79080000	1.27	0.706	1.024
F4KEX3	Malate dehydrogenase OS=Arabidopsis thaliana GN=MCK7.20 PE=3 SV=1	0.818	Down	MCK7.20	46.4	36.39	276.44	57	14	14	21	19	17	13	14	13	13	14	13	3120000000	2550900000	3210600000	1.054	0.862	1.084
Q9S9N6	Photosynthetic NDH subunit of subcomplex B 1, chloroplastic OS=Arabidopsis thaliana GN=PNSB1 PE=2 SV=1	0.705	Down	PNSB1	29.5	51.022	89.975	28	11	11	8	8	12	10	10	11	10	10	11	597640000	421120000	515910000	1.168	0.823	1.009
O23207	Probable NAD(P)H dehydrogenase (quinone) FQR1-like 2 OS=Arabidopsis thaliana GN=At4g36750 PE=1 SV=1	0.748	Down	At4g36750	39.6	28.754	84.769	10	5	5	4	3	3	4	4	4	4	4	4	115790000	86594000	112210000	1.104	0.826	1.07
Q9C9P4	3-oxoacyl-[acyl-carrier-protein] synthase II, chloroplastic OS=Arabidopsis thaliana GN=KAS2 PE=1 SV=1	0.503	Down	KAS2	11.3	57.599	29.957	10	4	4	3	5	2	4	4	4	4	4	4	61212000	30767000	45186000	1.339	0.673	0.988
O49304	At1g23130/T26J12_10 OS=Arabidopsis thaliana GN=At1g23130 PE=2 SV=1	0.732	Down	At1g23130	55.6	17.859	87.52	32	9	9	12	11	9	9	9	8	9	9	8	614770000	450290000	579450000	1.121	0.821	1.057
Q84W11	At5g04750 OS=Arabidopsis thaliana GN=MUK11.3 PE=2 SV=1	1.652	Up	MUK11.3	19.1	10.703	12.488	5	2	1	2	2	1	1	2	2	1	1	1	66074000	109090000	49005000	0.884	1.46	0.656
Q8L7W0	SH3 domain-containing protein 3 OS=Arabidopsis thaliana GN=SH3P3 PE=1 SV=1	2.307	Up	SH3P3	5.1	39.533	14.543	3	2	2	0	2	1	2	2	2	2	2	2	12370000	28531000	14409000	0.671	1.548	0.782
Q9LK94	Monodehydroascorbate reductase 4, peroxisomal OS=Arabidopsis thaliana GN=MDAR4 PE=1 SV=1	1.241	Up	MDAR4	31.1	53.526	83.554	17	10	10	4	4	9	8	8	10	8	8	10	139980000	173680000	179260000	0.852	1.057	1.091
Q38799	Pyruvate dehydrogenase E1 component subunit beta-1, mitochondrial OS=Arabidopsis thaliana GN=PDH2 PE=1 SV=2	1.223	Up	PDH2	30.9	39.175	137.77	34	9	9	11	9	14	9	9	9	9	9	9	731430000	894950000	807150000	0.902	1.103	0.995
A0A1P8BCY0	PsbP domain protein (Mog1/PsbP/DUF1795-like photosystem II reaction center PsbP family protein) OS=Arabidopsis thaliana GN=PPD5 PE=4 SV=1	0.705	Down	PPD5	24.1	35.328	47.147	27	7	7	9	10	8	7	6	7	7	6	7	1357500000	956110000	1139700000	1.179	0.831	0.99
Q9C6K5	Sm-like protein LSM3B OS=Arabidopsis thaliana GN=LSM3B PE=1 SV=1	1.376	Up	LSM3B	36.7	11.286	34.078	12	4	4	4	4	4	4	4	4	4	4	4	114260000	157340000	88896000	0.951	1.309	0.74
Q93Z16	Dolichyl-diphosphooligosaccharide--protein glycosyltransferase subunit 2 OS=Arabidopsis thaliana GN=RPN2 PE=1 SV=1	1.32	Up	RPN2	31.4	74.667	172.05	44	18	18	11	18	15	14	17	14	14	17	14	322360000	425690000	350150000	0.881	1.163	0.957
Q94AZ2	Sugar transport protein 13 OS=Arabidopsis thaliana GN=STP13 PE=1 SV=2	0.793	Down	STP13	3.2	57.419	14.586	4	1	1	2	1	1	1	1	1	1	1	1	7397100	5868900	7637800	1.062	0.842	1.096
O04157	Ras-related protein RABG3b OS=Arabidopsis thaliana GN=RABG3B PE=1 SV=1	0.506	Down	RABG3B	34.5	22.945	44.396	8	6	4	3	2	3	5	4	5	3	2	3	29720000	15058000	26456000	1.252	0.634	1.114
P0CZ23	Acyl-coenzyme A oxidase 3, peroxisomal OS=Arabidopsis thaliana GN=ACX3 PE=1 SV=1	1.866	Up	ACX3	8.1	75.675	35.217	8	5	5	1	5	2	3	5	4	3	5	4	31667000	59072000	35754000	0.751	1.401	0.848
Q84MC2	Cytokinin riboside 5'-monophosphate phosphoribohydrolase LOG8 OS=Arabidopsis thaliana GN=LOG8 PE=1 SV=1	1.249	Up	LOG8	33.8	23.831	40.201	17	5	5	7	7	3	5	5	5	5	5	5	99758000	124570000	60650000	1.05	1.311	0.638
Q42134	Proteasome subunit alpha type-5-B OS=Arabidopsis thaliana GN=PAE2 PE=1 SV=2	1.245	Up	PAE2	68.8	25.977	280.67	37	12	2	9	15	13	11	12	12	2	2	2	794990000	989880000	849560000	0.905	1.127	0.967
O23676	Protein mago nashi homolog OS=Arabidopsis thaliana GN=MAGO PE=1 SV=1	1.434	Up	MAGO	38	17.458	41.628	6	5	5	2	2	2	4	5	5	4	5	5	36825000	52865000	66657000	0.707	1.014	1.279
Q8L7S6	Beta-hexosaminidase 3 OS=Arabidopsis thaliana GN=HEXO3 PE=1 SV=1	0.665	Down	HEXO3	21.7	60.013	63.175	18	9	8	7	3	8	9	9	9	8	8	8	262070000	174230000	270150000	1.113	0.74	1.147
Q9LZQ3	Heme binding protein OS=Arabidopsis thaliana GN=T12C14_70 PE=2 SV=1	1.239	Up	T12C14_70	8	39.852	14.781	4	2	2	1	1	2	2	2	2	2	2	2	38398000	47563000	40172000	0.913	1.131	0.955
Q8VYW6	Gamma-glutamyltranspeptidase 1 OS=Arabidopsis thaliana GN=GGT1 PE=2 SV=1	0.829	Down	GGT1	22.9	61.189	78.109	21	9	9	6	6	9	8	7	9	8	7	9	284850000	236190000	331720000	1.002	0.831	1.167
Q9FX45	Organelle RRM domain-containing protein 6, chloroplastic OS=Arabidopsis thaliana GN=ORRM6 PE=1 SV=1	1.431	Up	ORRM6	9.9	20.063	13.334	5	2	2	1	2	2	2	2	2	2	2	2	31111000	44520000	34587000	0.847	1.212	0.941
Q0WW26	Coatomer subunit gamma OS=Arabidopsis thaliana GN=At4g34450 PE=1 SV=2	2.159	Up	At4g34450	10.4	98.49	97.65	17	6	6	4	5	8	4	4	6	4	4	6	33373000	72043000	45110000	0.665	1.436	0.899
F4J9K9	Neurofilament protein-like protein OS=Arabidopsis thaliana GN=At3g05900 PE=1 SV=1	0.718	Down	At3g05900	48.3	73.453	323.31	78	25	25	25	20	33	23	25	25	23	25	25	979630000	703430000	1045400000	1.077	0.773	1.149
Q9FKL6	Calmodulin-binding protein 60 B OS=Arabidopsis thaliana GN=CBP60B PE=2 SV=1	2.359	Up	CBP60B	3.4	72.363	19.164	3	3	3	0	3	0	2	3	2	2	3	2	13329000	31448000	14806000	0.671	1.583	0.745
A0A1P8BAW5	Protein kinase superfamily protein OS=Arabidopsis thaliana GN=MPF21.1 PE=4 SV=1	1.677	Up	MPF21.1	10.9	36.613	19.478	6	4	3	1	3	2	3	4	3	2	3	2	19383000	32482000	0	0.747	1.253
P0DH96	Calmodulin-4 OS=Arabidopsis thaliana GN=CAM4 PE=1 SV=1	1.293	Up	CAM4	63.8	16.862	323.31	81	12	2	25	31	25	12	12	12	2	2	2	4760500000	6155100000	4691600000	0.915	1.183	0.902
A0A1P8BAU8	GPI-anchored adhesin-like protein OS=Arabidopsis thaliana GN=MRO11.7 PE=1 SV=1	1.552	Up	MRO11.7	13.9	90.749	78.955	16	8	8	4	9	3	6	8	7	6	8	7	48969000	75982000	74889000	0.735	1.141	1.124
Q42479	Calcium-dependent protein kinase 3 OS=Arabidopsis thaliana GN=CPK3 PE=1 SV=1	1.257	Up	CPK3	35.5	59.336	152.81	34	13	13	9	11	14	11	12	12	11	12	12	276730000	347830000	282460000	0.915	1.15	0.934
Q94EH8	THO complex subunit 4C OS=Arabidopsis thaliana GN=ALY3 PE=1 SV=1	2.147	Up	ALY3	16.6	31.318	44.67	13	5	5	3	6	4	5	5	4	5	5	4	53420000	114610000	64804000	0.688	1.477	0.835
A0A1P8AYB1	Senescence/dehydration-associated protein-like protein OS=Arabidopsis thaliana GN=ERD7 PE=1 SV=1	1.283	Up	ERD7	21.8	43.055	82.735	14	7	7	6	5	3	7	7	7	7	7	7	86282000	110710000	99707000	0.872	1.119	1.008
Q9SLA8	Enoyl-[acyl-carrier-protein] reductase [NADH], chloroplastic OS=Arabidopsis thaliana GN=MOD1 PE=1 SV=1	0.766	Down	MOD1	33.8	41.213	244.74	39	11	11	11	12	16	11	9	9	11	9	9	1443300000	1105500000	1460800000	1.08	0.827	1.093
Q8LPL3	Ascorbate oxidase-like protein OS=Arabidopsis thaliana GN=At5g21100 PE=2 SV=1	0.485	Down	At5g21100	10.1	64.265	42.969	9	4	4	4	1	4	4	4	4	4	4	4	127020000	61598000	171120000	1.059	0.514	1.427
Q24JN5	Prolyl 4-hydroxylase 5 OS=Arabidopsis thaliana GN=P4H5 PE=2 SV=1	1.577	Up	P4H5	15.5	32.691	35.226	10	5	5	3	5	2	3	5	4	3	5	4	48273000	76074000	46777000	0.846	1.334	0.82
Q9SIB9	Aconitate hydratase 3, mitochondrial OS=Arabidopsis thaliana GN=ACO3 PE=1 SV=2	1.249	Up	ACO3	49.9	108.2	323.31	115	37	25	35	45	35	36	36	33	25	24	22	3094500000	3863600000	3308100000	0.904	1.129	0.967
F4IR82	Nucleic acid binding/RNA binding protein OS=Arabidopsis thaliana GN=At2g02570 PE=4 SV=1	1.218	Up	At2g02570	5.2	32.034	10.81	4	2	2	1	1	2	2	2	2	2	2	2	17950000	21858000	10465000	1.071	1.304	0.624
Q9M156	UDP-glycosyltransferase 72B1 OS=Arabidopsis thaliana GN=UGT72B1 PE=1 SV=1	1.647	Up	UGT72B1	18.1	52.929	51.034	12	8	6	3	5	4	7	8	7	5	6	5	59659000	98215000	60854000	0.818	1.347	0.835
F4JEN1	CTC-interacting domain 4 OS=Arabidopsis thaliana GN=CID4 PE=4 SV=1	1.201	Up	CID4	9.1	60.194	43.645	8	4	4	3	3	2	4	4	4	4	4	4	53947000	64788000	57318000	0.919	1.104	0.977
Q9FME9	CHCH domain protein OS=Arabidopsis thaliana GN=MSJ1.24 PE=2 SV=1	1.326	Up	MSJ1.24	22.9	14.404	24.133	3	3	3	1	2	0	3	3	3	3	3	3	61545000	81659000	62241000	0.899	1.192	0.909
P49201	40S ribosomal protein S23-2 OS=Arabidopsis thaliana GN=RPS23B PE=2 SV=2	1.273	Up	RPS23B	41.5	15.735	35.691	10	4	4	3	5	2	4	4	4	4	4	4	119760000	152590000	102770000	0.958	1.22	0.822
Q9FKU8	Berberine bridge enzyme-like 26 OS=Arabidopsis thaliana GN=At5g44400 PE=2 SV=1	0.694	Down	At5g44400	16.2	60.345	59.87	17	9	9	7	3	7	9	8	9	9	8	9	104810000	72743000	108630000	1.099	0.763	1.139
Q9M1X3	AT3g63160/F16M2_10 OS=Arabidopsis thaliana GN=F16M2_10 PE=1 SV=1	0.464	Down	F16M2_10	46.4	7.2563	25.915	13	4	4	6	4	3	4	3	3	4	3	3	825420000	382420000	1060900000	1.091	0.506	1.403
O04379	Protein argonaute 1 OS=Arabidopsis thaliana GN=AGO1 PE=1 SV=1	1.239	Up	AGO1	3.2	116.19	26.37	5	4	4	1	3	1	3	4	4	3	4	4	24556000	30418000	26864000	0.9	1.115	0.985
Q9SU40	Monocopper oxidase-like protein SKU5 OS=Arabidopsis thaliana GN=SKU5 PE=1 SV=1	0.616	Down	SKU5	19.8	65.637	123.99	25	11	11	10	6	9	8	9	10	8	9	10	591430000	364440000	610150000	1.133	0.698	1.169
Q9LSE4	Protein COFACTOR ASSEMBLY OF COMPLEX C SUBUNIT B CCB1, chloroplastic OS=Arabidopsis thaliana GN=CCB1 PE=1 SV=1	0.467	Down	CCB1	13.5	30.101	26.779	6	4	4	3	1	2	4	4	3	4	4	3	159060000	74212000	110540000	1.388	0.648	0.965
Q94BY7	AT3g17930/MEB5_15 OS=Arabidopsis thaliana GN=DAC PE=1 SV=1	1.409	Up	DAC	15.8	20.913	51.925	7	2	2	3	3	1	2	2	2	2	2	2	49571000	69851000	48579000	0.885	1.247	0.867
Q8GRX2	Eukaryotic translation initiation factor 3 subunit J OS=Arabidopsis thaliana GN=At5g37475 PE=1 SV=1	1.882	Up	At5g37475	16.4	25.168	59.002	6	3	3	2	2	2	3	3	3	3	3	3	21255000	39986000	26429000	0.727	1.368	0.904
Q9SHC8	Vesicle-associated protein 1-2 OS=Arabidopsis thaliana GN=PVA12 PE=1 SV=1	1.401	Up	PVA12	25.5	26.442	79.26	11	7	7	3	5	3	6	6	5	6	6	5	43886000	61524000	42590000	0.89	1.247	0.863
Q9XGM1	V-type proton ATPase subunit D OS=Arabidopsis thaliana GN=VHA-D PE=1 SV=2	0.76	Down	VHA-D	39.5	29.058	98.412	37	12	12	12	11	14	11	10	12	11	10	12	646810000	491620000	720440000	1.044	0.793	1.163
Q9FZK4	F17L21.10 OS=Arabidopsis thaliana GN=NTF2A PE=1 SV=1	1.46	Up	NTF2A	16.4	13.527	14.848	5	2	2	2	2	1	2	2	2	2	2	2	60403000	88195000	68484000	0.835	1.219	0.946
Q9FJD4	Importin subunit beta-1 OS=Arabidopsis thaliana GN=KPNB1 PE=1 SV=1	1.626	Up	KPNB1	9.8	96.258	41.093	10	7	7	3	5	2	6	7	6	6	7	6	56394000	91626000	67919000	0.783	1.273	0.944
P42762	Chaperone protein ClpD, chloroplastic OS=Arabidopsis thaliana GN=CLPD PE=1 SV=1	1.735	Up	CLPD	10.4	103.23	46.244	6	9	7	0	6	0	6	9	6	4	7	4	27456000	47635000	27737000	0.801	1.39	0.809
Q9XI36	Methyl-CpG-binding domain-containing protein 10 OS=Arabidopsis thaliana GN=MBD10 PE=1 SV=1	1.311	Up	MBD10	28.1	42.357	61.241	19	7	6	6	7	6	7	7	6	6	6	5	261320000	342580000	285890000	0.881	1.155	0.964
P29402	Calnexin homolog 1 OS=Arabidopsis thaliana GN=CNX1 PE=1 SV=1	2.145	Up	CNX1	37	60.485	167.45	50	16	11	15	19	16	15	16	15	11	11	10	475880000	1020800000	480400000	0.722	1.549	0.729
A0A1P8B2X5	Regulatory particle non-ATPase 13 OS=Arabidopsis thaliana GN=RPN13 PE=4 SV=1	0.79	Down	RPN13	19.3	32.771	26.665	6	4	4	2	2	2	3	4	3	3	4	3	39255000	31011000	24958000	1.237	0.977	0.786
Q9SGS4	Thioredoxin-like protein CDSP32, chloroplastic OS=Arabidopsis thaliana GN=CDSP32 PE=1 SV=1	1.345	Up	CDSP32	53	33.684	105.97	44	12	12	12	17	15	12	12	12	12	12	12	936240000	1259800000	1069300000	0.86	1.157	0.982
P56753	NAD(P)H-quinone oxidoreductase subunit H, chloroplastic OS=Arabidopsis thaliana GN=ndhH PE=1 SV=1	0.617	Down	ndhH	35.4	45.502	116.83	29	10	10	9	10	10	10	10	10	10	10	10	602840000	372410000	542300000	1.192	0.736	1.072
A8MQN5	LisH and RanBPM domains containing protein OS=Arabidopsis thaliana GN=At1g61150 PE=4 SV=1	1.447	Up	At1g61150	30.5	25.042	55.436	13	4	4	5	4	4	4	3	4	4	3	4	73586000	106480000	78076000	0.855	1.237	0.907
A0A1P8B252	Peptidylprolyl isomerase OS=Arabidopsis thaliana GN=At2g43560 PE=4 SV=1	0.687	Down	At2g43560	43.1	17.632	74.047	26	8	8	9	8	9	8	7	7	8	7	7	1696200000	1165600000	1226900000	1.245	0.855	0.9
Q9FVT2	Probable elongation factor 1-gamma 2 OS=Arabidopsis thaliana GN=At1g57720 PE=1 SV=1	0.817	Down	At1g57720	54.5	46.4	277.52	106	21	11	39	29	38	21	21	20	11	11	11	3207400000	2619700000	3261300000	1.059	0.865	1.077
O81146	Proteasome subunit alpha type-6-A OS=Arabidopsis thaliana GN=PAA1 PE=1 SV=2	1.435	Up	PAA1	65.4	27.294	199.9	16	15	6	5	6	5	13	15	14	5	6	6	357210000	512500000	406930000	0.839	1.204	0.956
Q94K59	Phosphorylase superfamily protein OS=Arabidopsis thaliana GN=At4g24350 PE=2 SV=1	0.504	Down	At4g24350	24.7	36.696	61.987	18	6	6	6	6	6	5	6	6	5	6	6	263460000	132830000	284370000	1.161	0.585	1.253
Q9SI20	Elongation factor 1-delta 2 OS=Arabidopsis thaliana GN=At2g18110 PE=1 SV=1	1.942	Up	At2g18110	25.5	25.266	21.102	6	6	2	2	2	2	5	6	6	2	2	2	30468000	59174000	27966000	0.777	1.509	0.713
Q9LSI9	Inactive LRR receptor-like serine/threonine-protein kinase BIR2 OS=Arabidopsis thaliana GN=BIR2 PE=1 SV=1	1.378	Up	BIR2	3.3	66.944	12.701	3	2	2	1	2	0	2	2	1	2	2	1	14532000	20012000	0	0.841	1.159
Q940J9	Probable methyltransferase PMT8 OS=Arabidopsis thaliana GN=At1g04430 PE=2 SV=1	1.249	Up	At1g04430	8.8	70.507	32.827	8	3	3	2	3	3	3	3	3	3	3	3	38291000	47840000	59894000	0.787	0.983	1.23
O23553	Beta-amylase 3, chloroplastic OS=Arabidopsis thaliana GN=BAM3 PE=1 SV=3	1.528	Up	BAM3	45.1	61.352	167.9	52	22	22	18	20	14	21	21	20	21	21	20	407970000	623460000	395730000	0.858	1.311	0.832
Q9C8P0	Dihydrolipoyllysine-residue acetyltransferase component 5 of pyruvate dehydrogenase complex, chloroplastic OS=Arabidopsis thaliana GN=EMB3003 PE=2 SV=1	0.796	Down	EMB3003	31.4	48.306	115.64	23	10	8	8	5	10	9	8	9	7	6	7	443480000	352910000	434940000	1.08	0.86	1.06
Q9LS40	Protein ASPARTIC PROTEASE IN GUARD CELL 1 OS=Arabidopsis thaliana GN=ASPG1 PE=1 SV=1	0.768	Down	ASPG1	27.8	53.233	202.03	36	12	12	14	12	10	12	12	11	12	12	11	934180000	717560000	958200000	1.074	0.825	1.101
Q94AW8	Chaperone protein dnaJ 3 OS=Arabidopsis thaliana GN=ATJ3 PE=1 SV=2	2.634	Up	ATJ3	26.4	46.444	78.7	21	10	3	4	13	4	8	10	6	2	3	0	226380000	596160000	251710000	0.632	1.665	0.703
Q0WWT7	Rhodanese-like domain-containing protein 11, chloroplastic OS=Arabidopsis thaliana GN=STR11 PE=2 SV=1	1.809	Up	STR11	18.2	32.113	61.241	14	3	3	4	5	5	3	3	3	3	3	3	252440000	456920000	387090000	0.691	1.25	1.059
Q56Y42	Pyridoxal reductase, chloroplastic OS=Arabidopsis thaliana GN=PLR1 PE=1 SV=1	0.71	Down	PLR1	11.8	40.576	31.666	5	4	4	2	1	2	4	4	4	4	4	4	51760000	36689000	63891000	1.019	0.723	1.258
A0A1P8B8I3	Plant intracellular ras group-related LRR 4 OS=Arabidopsis thaliana GN=PIRL4 PE=1 SV=1	0.748	Down	PIRL4	8.3	59.881	40.132	9	3	3	2	3	4	2	3	3	2	3	3	37709000	28206000	34995000	1.121	0.839	1.04
Q9FPF0	Protein DJ-1 homolog A OS=Arabidopsis thaliana GN=DJ1A PE=1 SV=1	0.803	Down	DJ1A	37	41.857	214.26	50	11	11	19	15	16	10	10	11	10	10	11	1220600000	979860000	1086100000	1.114	0.894	0.991
F4IHB2	Glycine-rich protein 3 OS=Arabidopsis thaliana GN=GRP-3 PE=4 SV=1	0.794	Down	GRP-3	31.5	11.193	31.497	18	3	3	9	6	3	3	3	3	3	3	3	1521400000	1209100000	1681000000	1.035	0.822	1.143
Q9SNB5	DCL protein (DUF3223) OS=Arabidopsis thaliana GN=F12A12.150 PE=2 SV=1	1.302	Up	F12A12.150	16.4	24.191	22.337	5	4	4	0	3	2	4	4	3	4	4	3	45686000	59509000	52975000	0.867	1.129	1.005
Q42472	Glutamate decarboxylase 2 OS=Arabidopsis thaliana GN=GAD2 PE=1 SV=1	0.553	Down	GAD2	59.3	56.14	323.31	81	23	23	30	21	30	22	21	20	22	21	20	1817000000	1005300000	1824800000	1.173	0.649	1.178
O24658	Endochitinase At2g43590 OS=Arabidopsis thaliana GN=At2g43590 PE=2 SV=1	1.628	Up	At2g43590	24.6	28.353	43.136	7	4	4	1	2	4	3	3	4	3	3	4	44172000	71853000	83432000	0.664	1.081	1.255
Q9SIE7	PLAT domain-containing protein 2 OS=Arabidopsis thaliana GN=PLAT2 PE=2 SV=1	0.442	Down	PLAT2	35.5	20.129	57.519	11	5	4	4	2	5	5	4	5	4	3	4	789950000	349220000	655220000	1.321	0.584	1.095
Q39054	Molybdopterin biosynthesis protein CNX1 OS=Arabidopsis thaliana GN=CNX1 PE=1 SV=2	0.815	Down	CNX1	16	71.278	56.665	11	8	8	3	4	4	8	8	8	8	8	8	77859000	63414000	82001000	1.046	0.852	1.102
Q9LV35	Actin-interacting protein 1-2 OS=Arabidopsis thaliana GN=AIP1-2 PE=2 SV=1	1.65	Up	AIP1-2	36	66.041	164.15	36	17	17	9	16	11	15	17	16	15	17	16	217950000	359330000	261660000	0.779	1.285	0.936
Q93VR3	GDP-mannose 3,5-epimerase OS=Arabidopsis thaliana GN=At5g28840 PE=1 SV=1	1.369	Up	At5g28840	58.1	42.758	180.87	61	20	20	18	24	19	19	20	18	19	20	18	801790000	1098300000	903370000	0.858	1.175	0.967
Q8GWP6	Putative uncharacterized protein At1g05720 OS=Arabidopsis thaliana GN=At1g05720 PE=2 SV=1	1.553	Up	At1g05720	31.9	18.573	29.898	7	4	4	2	3	2	4	3	4	4	3	4	46308000	71844000	50141000	0.825	1.281	0.894
Q38954	Inorganic phosphate transporter 2-1, chloroplastic OS=Arabidopsis thaliana GN=PHT2-1 PE=1 SV=1	0.547	Down	PHT2-1	3.4	61.418	20.222	4	3	3	2	1	1	3	2	1	3	2	1	26977000	14752000	0	1.293	0.707
F4KG92	RabGAP/TBC domain-containing protein OS=Arabidopsis thaliana GN=At5g52580 PE=1 SV=1	1.285	Up	At5g52580	5.2	77.67	19.743	9	3	3	4	3	2	3	3	3	3	3	3	12683000	16302000	16056000	0.845	1.086	1.069
F4K3A9	HAD-superfamily hydrolase, subfamily IG, 5'-nucleotidase OS=Arabidopsis thaliana GN=At5g48960 PE=4 SV=1	0.702	Down	At5g48960	26.3	72.892	197.06	29	12	12	8	10	11	11	11	12	11	11	12	250990000	176310000	218710000	1.166	0.819	1.016
P35614	Eukaryotic peptide chain release factor subunit 1-3 OS=Arabidopsis thaliana GN=ERF1-3 PE=1 SV=1	1.984	Up	ERF1-3	10.3	49.007	40.561	6	4	4	2	3	1	4	4	4	4	4	4	18269000	36236000	22778000	0.709	1.407	0.884
Q9SU72	Protein EDS1 OS=Arabidopsis thaliana GN=EDS1 PE=1 SV=1	6.429	Up	EDS1	6.4	71.689	22.626	4	4	4	0	4	0	2	4	2	2	4	2	5597700	35966000	7085900	0.345	2.218	0.437
Q9LPK9	F24J8.11 protein OS=Arabidopsis thaliana GN=At1g21500 PE=2 SV=1	0.682	Down	At1g21500	16.7	13.258	19.321	14	3	3	4	7	3	3	3	3	3	3	3	680340000	464260000	522500000	1.224	0.835	0.94
P34802	Heterodimeric geranylgeranyl pyrophosphate synthase large subunit 1, chloroplastic OS=Arabidopsis thaliana GN=GGPPS1 PE=1 SV=2	1.358	Up	GGPPS1	19.4	40.174	103.22	17	4	4	7	5	5	4	4	3	4	4	3	172310000	233940000	171240000	0.895	1.215	0.89
O82089	Copper transport protein CCH OS=Arabidopsis thaliana GN=CCH PE=1 SV=1	0.548	Down	CCH	76	12.971	105.61	52	11	11	21	15	16	11	11	10	11	11	10	2901800000	1589800000	2234900000	1.294	0.709	0.997
F4JLP5	Dihydrolipoyl dehydrogenase 2, chloroplastic OS=Arabidopsis thaliana GN=LPD2 PE=2 SV=2	0.799	Down	LPD2	27.2	60.144	93.176	31	12	4	11	9	11	11	12	12	4	4	4	322890000	257820000	348060000	1.043	0.833	1.124
Q9FZ80	Cytosolic sulfotransferase 17 OS=Arabidopsis thaliana GN=SOT17 PE=1 SV=1	0.741	Down	SOT17	35	39.912	53.849	14	10	7	6	2	6	10	9	9	7	6	6	134290000	99472000	128750000	1.111	0.823	1.065
P52577	Isoflavone reductase homolog P3 OS=Arabidopsis thaliana GN=At1g75280 PE=2 SV=1	0.523	Down	At1g75280	34.2	33.736	126.51	31	10	10	10	10	11	10	10	10	10	10	10	817800000	427340000	898970000	1.144	0.598	1.258
Q8W4Q1	At4g35360/F23E12_80 OS=Arabidopsis thaliana GN=At4g35360 PE=1 SV=1	0.646	Down	At4g35360	22.6	41.001	48.145	14	7	6	7	2	5	6	6	7	5	5	6	112790000	72901000	89384000	1.23	0.795	0.975
Q9FWR4	Glutathione S-transferase DHAR1, mitochondrial OS=Arabidopsis thaliana GN=DHAR1 PE=1 SV=1	0.536	Down	DHAR1	86.4	23.641	323.31	101	18	18	36	29	36	18	18	18	18	18	18	6585100000	3530800000	7351500000	1.131	0.606	1.263
Q9SIU2	Nuclear cap-binding protein subunit 1 OS=Arabidopsis thaliana GN=ABH1 PE=1 SV=2	2.515	Up	ABH1	6.1	96.547	27.42	3	4	4	1	2	0	2	4	2	2	4	2	16781000	42202000	0	0.569	1.431
Q9LJ65	2-oxoglutarate (2OG) and Fe(II)-dependent oxygenase superfamily protein OS=Arabidopsis thaliana GN=At3g19010 PE=2 SV=1	1.848	Up	At3g19010	49.3	40.696	305.95	54	14	14	16	25	13	14	13	13	14	13	13	421270000	778870000	395850000	0.792	1.464	0.744
Q9LVS0	Transcription factor KUA1 OS=Arabidopsis thaliana GN=KUA1 PE=1 SV=1	1.729	Up	KUA1	8.8	39.67	48.78	8	3	2	2	4	2	2	3	2	1	2	1	68131000	117720000	72191000	0.792	1.369	0.839
Q9SSM4	ESCRT-related protein CHMP1B OS=Arabidopsis thaliana GN=CHMP1B PE=1 SV=1	2.802	Up	CHMP1B	21.7	22.691	30.374	5	4	4	0	5	0	3	4	3	3	4	3	21632000	60599000	23119000	0.616	1.726	0.658
Q9XFT3	Oxygen-evolving enhancer protein 3-1, chloroplastic OS=Arabidopsis thaliana GN=PSBQ1 PE=1 SV=3	0.826	Down	PSBQ1	41.1	23.866	137.18	195	14	12	70	59	66	14	14	14	12	12	12	53215000000	43965000000	39250000000	1.17	0.967	0.863
F4JM22	LOW PSII ACCUMULATION-like protein OS=Arabidopsis thaliana GN=At4g28740 PE=1 SV=1	0.66	Down	At4g28740	18.2	38.887	44.813	10	6	6	4	3	3	6	5	5	6	5	5	105670000	69743000	89851000	1.195	0.789	1.016
Q9SZ63	Nudix hydrolase 14, chloroplastic OS=Arabidopsis thaliana GN=NUDT14 PE=1 SV=2	0.59	Down	NUDT14	24.3	34.253	50.454	8	5	5	5	1	2	5	5	4	5	5	4	116710000	68945000	114410000	1.167	0.689	1.144
Q5YDB6	RNA polymerase II C-terminal domain phosphatase-like 1 OS=Arabidopsis thaliana GN=CPL1 PE=1 SV=1	1.745	Up	CPL1	2.1	108.42	15.941	6	2	2	1	3	2	2	2	2	2	2	2	4963700	8657000	4708400	0.812	1.417	0.771
F4IY75	Biotin/lipoyl attachment domain-containing protein OS=Arabidopsis thaliana GN=At3g56130 PE=4 SV=1	0.537	Down	At3g56130	22.9	29.542	43.573	11	4	4	4	3	4	3	4	4	3	4	4	68492000	36728000	63839000	1.215	0.652	1.133
P25857	Glyceraldehyde-3-phosphate dehydrogenase GAPB, chloroplastic OS=Arabidopsis thaliana GN=GAPB PE=1 SV=2	0.628	Down	GAPB	58.6	47.659	323.31	159	25	21	54	49	56	24	24	24	20	20	20	23655000000	14856000000	26200000000	1.097	0.689	1.215
A0A1I9LS90	Photosystem II subunit T OS=Arabidopsis thaliana GN=PSBTN PE=4 SV=1	1.396	Up	PSBTN	9.1	15.633	14.828	15	2	2	6	4	5	2	2	2	2	2	2	282160000	394320000	509550000	0.714	0.997	1.289
Q93W22	60S ribosomal protein L10-3 OS=Arabidopsis thaliana GN=RPL10C PE=2 SV=1	2.009	Up	RPL10C	25.8	24.929	6.8463	5	6	1	1	2	2	6	4	6	1	1	1	13291000	26698000	21349000	0.65	1.306	1.044
Q8W4S6	Beta-fructofuranosidase, insoluble isoenzyme CWINV6 OS=Arabidopsis thaliana GN=CWINV6 PE=2 SV=1	29.423	Up	CWINV6	17.6	62.097	96.877	12	9	9	1	11	0	2	9	2	2	9	2	8368900	245010000	4175000	0.097	2.854	0.049
Q8L475	Alpha/beta-Hydrolases superfamily protein OS=Arabidopsis thaliana GN=At1g74640 PE=2 SV=1	1.319	Up	At1g74640	7.6	41.058	13.109	3	2	2	2	0	1	2	2	2	2	2	2	16214000	21394000	17987000	0.875	1.154	0.971
F4IFC5	Threonine--tRNA ligase, chloroplastic/mitochondrial 2 OS=Arabidopsis thaliana GN=EMB2761 PE=2 SV=1	1.425	Up	EMB2761	12.6	74.784	51.505	16	7	7	3	7	6	7	7	7	7	7	7	62771000	89371000	87319000	0.786	1.12	1.094
O49006	Pectinesterase/pectinesterase inhibitor 3 OS=Arabidopsis thaliana GN=PME3 PE=1 SV=2	0.702	Down	PME3	38.9	64.255	323.31	97	20	19	37	27	33	18	17	16	17	16	15	5243600000	3678700000	5084500000	1.123	0.788	1.089
A0A1P8AXD8	Tubulin/FtsZ family protein OS=Arabidopsis thaliana GN=FTSZ2-1 PE=3 SV=1	0.807	Down	FTSZ2-1	48.4	41.583	152.19	33	13	8	9	9	15	12	12	12	7	7	7	690920000	557930000	720010000	1.053	0.85	1.097
Q9SFT9	PPPDE putative thiol peptidase family protein OS=Arabidopsis thaliana GN=T1B9.26 PE=2 SV=1	2.209	Up	T1B9.26	19.6	28.846	31.862	8	5	5	2	4	2	3	5	3	3	5	3	21345000	47167000	23890000	0.693	1.531	0.776
Q8VY84	Probable UMP-CMP kinase 1 OS=Arabidopsis thaliana GN=UMK1 PE=2 SV=1	0.813	Down	UMK1	28.4	23.047	37.392	6	6	5	3	2	1	6	5	5	5	4	4	2269900000	1844400000	1766900000	1.158	0.941	0.901
Q9MA79	Fructose-1,6-bisphosphatase, cytosolic OS=Arabidopsis thaliana GN=CYFBP PE=1 SV=1	1.261	Up	CYFBP	54.3	37.287	323.31	66	17	17	18	24	24	16	17	16	16	17	16	1667100000	2103400000	1743500000	0.907	1.144	0.949
Q9S744	Calmodulin-like protein 9 OS=Arabidopsis thaliana GN=CML9 PE=1 SV=1	2.082	Up	CML9	18.5	17.036	18.514	7	2	2	2	3	2	2	2	2	2	2	2	33504000	69727000	26928000	0.772	1.607	0.621
Q42351	60S ribosomal protein L34-1 OS=Arabidopsis thaliana GN=RPL34A PE=2 SV=1	0.761	Down	RPL34A	33.3	13.705	12.316	8	4	2	3	1	4	4	3	4	2	2	2	64987000	49454000	83806000	0.983	0.748	1.268
Q9LZD8	UDP-glycosyltransferase 89A2 OS=Arabidopsis thaliana GN=UGT89A2 PE=2 SV=1	1.528	Up	UGT89A2	11	50.942	29.466	6	4	4	2	1	3	3	3	3	3	3	3	11670000	17846000	17806000	0.74	1.131	1.129
Q9LE06	Methionine aminotransferase BCAT4 OS=Arabidopsis thaliana GN=BCAT4 PE=1 SV=1	0.534	Down	BCAT4	33.6	39.018	61.506	15	8	8	4	5	6	8	8	7	8	8	7	236810000	126560000	181840000	1.303	0.696	1.001
Q67XD6	At2g32500 OS=Arabidopsis thaliana GN=At2g32500 PE=2 SV=1	0.69	Down	At2g32500	9.1	31.598	12.886	4	2	2	2	1	1	2	2	2	2	2	2	24421000	16860000	17806000	1.24	0.856	0.904
A0A1I9LPN8	Alpha-L-arabinofuranosidase 1 OS=Arabidopsis thaliana GN=ASD1 PE=4 SV=1	1.324	Up	ASD1	25.1	77.329	144.31	27	13	13	8	10	9	11	13	12	11	13	12	343260000	454330000	280330000	0.955	1.264	0.78
Q8RWG8	Ran-binding protein 1 homolog b OS=Arabidopsis thaliana GN=RANBP1B PE=1 SV=2	1.544	Up	RANBP1B	46.1	24.389	96.018	16	7	5	5	7	4	6	7	6	4	5	4	76774000	118540000	92842000	0.799	1.234	0.967
A0A1P8ART2	Molecular chaperone Hsp40/DnaJ family protein OS=Arabidopsis thaliana GN=DJA7 PE=3 SV=1	0.777	Down	DJA7	23.5	52.281	67.929	18	9	9	9	6	3	9	8	7	9	8	7	163280000	126910000	150080000	1.113	0.865	1.023
P92948	Cell division cycle 5-like protein OS=Arabidopsis thaliana GN=CDC5 PE=1 SV=2	1.713	Up	CDC5	7.9	95.766	37.851	10	5	5	5	5	0	5	5	5	5	5	5	29934000	51281000	20948000	0.879	1.506	0.615
Q9C685	At1g51100 OS=Arabidopsis thaliana GN=CHLORORESPIRATORY REDUCTION 41 PE=2 SV=1	0.677	Down	CHLORORESPIRATORY	53.6	24.161	77.439	22	10	10	8	7	7	10	10	10	10	10	10	420340000	284290000	319710000	1.231	0.833	0.936
P25697	Phosphoribulokinase, chloroplastic OS=Arabidopsis thaliana GN=At1g32060 PE=2 SV=1	0.73	Down	At1g32060	63.8	44.463	323.31	177	19	19	62	55	60	19	19	19	19	19	19	22916000000	16737000000	21336000000	1.127	0.823	1.05
O81852	Bifunctional aspartokinase/homoserine dehydrogenase 2, chloroplastic OS=Arabidopsis thaliana GN=AKHSDH2 PE=1 SV=1	0.758	Down	AKHSDH2	6.7	100.25	20.83	6	6	3	1	2	3	5	6	6	2	3	3	6883300	5216000	8817700	0.987	0.748	1.265
Q8RX86	Alpha-galactosidase 2 OS=Arabidopsis thaliana GN=AGAL2 PE=1 SV=1	0.814	Down	AGAL2	30.8	44.037	71.943	23	10	10	8	7	8	10	10	8	10	10	8	322000000	261820000	273100000	1.127	0.917	0.956
O64883	Beta-glucosidase 26, peroxisomal OS=Arabidopsis thaliana GN=BGLU26 PE=1 SV=1	2.168	Up	BGLU26	15.5	63.915	53.696	10	7	6	2	6	2	6	7	5	5	6	4	62326000	135000000	79973000	0.674	1.461	0.865
Q93Z11	AT5g37360/MNJ8_150 OS=Arabidopsis thaliana GN=MNJ8.18 PE=2 SV=1	0.82	Down	MNJ8.18	32	33.439	89.286	33	10	10	9	13	11	10	10	10	10	10	10	551980000	452420000	534730000	1.076	0.882	1.042
Q9S756	Ferritin-4, chloroplastic OS=Arabidopsis thaliana GN=FER4 PE=2 SV=1	1.46	Up	FER4	39.4	29.029	71.254	25	7	6	8	10	7	7	7	6	6	6	5	357960000	522610000	415510000	0.829	1.21	0.962
Q9SEH3	Ras-related protein RABD2c OS=Arabidopsis thaliana GN=RABD2C PE=1 SV=1	1.388	Up	RABD2C	54	22.318	69.378	19	8	2	6	7	6	8	8	6	2	2	2	304750000	423030000	306750000	0.884	1.227	0.89
Q940P0	AT5g03660/F17C15_80 OS=Arabidopsis thaliana GN=At5g03660 PE=1 SV=1	1.363	Up	At5g03660	43.9	20.186	98.078	12	7	6	5	5	2	7	7	7	6	6	6	113060000	154140000	101800000	0.919	1.253	0.828
Q9FID2	Acyltransferase-like protein OS=Arabidopsis thaliana GN=MXF12.90 PE=2 SV=1	1.277	Up	MXF12.90	8.4	51.484	26.803	11	4	4	4	5	2	4	4	4	4	4	4	75369000	96255000	70763000	0.933	1.191	0.876
Q9FY50	50S ribosomal protein L10, chloroplastic OS=Arabidopsis thaliana GN=RPL10 PE=2 SV=1	0.674	Down	RPL10	50	24.736	148.05	31	8	8	12	8	11	8	8	8	8	8	8	1347400000	907980000	1441900000	1.093	0.737	1.17
Q9S7Z8	Auxin efflux carrier component 3 OS=Arabidopsis thaliana GN=PIN3 PE=1 SV=1	1.392	Up	PIN3	4.2	69.465	17.567	3	2	2	2	1	0	2	2	1	2	2	1	9753800	13587000	0	0.836	1.164
Q8LG56	At1g05205 OS=Arabidopsis thaliana GN=At1g05205 PE=2 SV=1	1.201	Up	At1g05205	22	10.676	11.847	4	2	2	2	1	1	2	2	2	2	2	2	9280200	11142000	8544000	0.961	1.154	0.885
Q96528	Catalase-1 OS=Arabidopsis thaliana GN=CAT1 PE=1 SV=3	2.711	Up	CAT1	31.9	56.761	33.51	15	16	5	4	7	4	13	16	14	3	5	4	76446000	207290000	81024000	0.629	1.705	0.666
Q9SSS7	AT1G52730 protein OS=Arabidopsis thaliana GN=At1g52730 PE=2 SV=1	1.961	Up	At1g52730	23.6	37.754	53.602	10	7	2	1	6	3	7	7	6	2	2	1	42636000	83572000	57263000	0.697	1.367	0.936
Q9M8R9	Putative 4-hydroxy-4-methyl-2-oxoglutarate aldolase 1 OS=Arabidopsis thaliana GN=At3g02770 PE=2 SV=1	1.45	Up	At3g02770	42.2	17.836	28.946	4	6	3	1	3	0	6	6	4	3	3	3	132380000	191990000	99301000	0.937	1.359	0.703
P93008	DEAD-box ATP-dependent RNA helicase 21 OS=Arabidopsis thaliana GN=RH21 PE=2 SV=1	1.82	Up	RH21	3.8	85.276	27.784	5	2	2	2	2	1	2	2	2	2	2	2	9441400	17185000	11092000	0.751	1.367	0.882
Q9SII9	Ubiquitin domain-containing protein DSK2a OS=Arabidopsis thaliana GN=DSK2A PE=1 SV=2	1.509	Up	DSK2A	15.4	57.285	43.077	5	6	3	1	3	1	4	6	5	2	3	3	37435000	56496000	38497000	0.848	1.28	0.872
Q9C8D3	NAD(P)-binding Rossmann-fold superfamily protein OS=Arabidopsis thaliana GN=At1g66130 PE=4 SV=1	0.675	Down	At1g66130	26.1	40.097	120.38	13	9	9	5	5	3	7	7	8	7	7	8	113230000	76507000	100710000	1.17	0.79	1.04
Q9SUR9	Protein SGT1 homolog A OS=Arabidopsis thaliana GN=SGT1A PE=1 SV=1	1.497	Up	SGT1A	42	39.224	75.608	15	11	10	4	10	1	9	11	9	8	10	8	174840000	261730000	137270000	0.914	1.368	0.718
Q8H156	GTP-binding nuclear protein Ran-3 OS=Arabidopsis thaliana GN=RAN3 PE=1 SV=2	1.545	Up	RAN3	45.7	25.079	73.987	25	9	9	6	11	8	7	9	9	7	9	9	580700000	896840000	669730000	0.811	1.253	0.936
O82264	NPL4-like protein 2 OS=Arabidopsis thaliana GN=At2g47970 PE=1 SV=1	1.753	Up	At2g47970	12.8	46.169	31.537	9	4	4	3	4	2	4	4	4	4	4	4	36846000	64589000	38239000	0.791	1.387	0.821
Q9XI05	Proteasome subunit beta type-3-A OS=Arabidopsis thaliana GN=PBC1 PE=1 SV=2	1.335	Up	PBC1	34.3	22.798	62.377	11	5	5	2	4	5	3	4	5	3	4	5	76973000	102690000	100080000	0.825	1.101	1.073
Q8RX79	Peptide chain release factor APG3, chloroplastic OS=Arabidopsis thaliana GN=APG3 PE=2 SV=1	1.221	Up	APG3	6.4	47.529	27.318	5	2	2	1	2	2	2	2	2	2	2	2	28050000	34234000	33742000	0.876	1.07	1.054
Q9SJ44	Ubiquitin-conjugating enzyme E2 variant 1C OS=Arabidopsis thaliana GN=UEV1C PE=1 SV=1	1.361	Up	UEV1C	62.8	16.481	93.907	33	8	4	10	12	11	7	7	8	4	4	4	418320000	569740000	382060000	0.916	1.247	0.837
Q9SFV3	At3g07230 OS=Arabidopsis thaliana GN=T1B9.10 PE=2 SV=1	1.445	Up	T1B9.10	45.7	5.3049	17.795	6	2	2	2	2	2	2	2	2	2	2	2	86667000	125230000	70968000	0.919	1.328	0.753
Q9STS1	Betaine aldehyde dehydrogenase 2, mitochondrial OS=Arabidopsis thaliana GN=ALDH10A9 PE=2 SV=1	0.801	Down	ALDH10A9	20.9	54.918	43.475	11	6	6	4	3	4	6	6	5	6	6	5	95043000	76053000	88258000	1.099	0.88	1.021
B3H658	Branched-chain-amino-acid aminotransferase OS=Arabidopsis thaliana GN=BCAT3 PE=3 SV=1	0.667	Down	BCAT3	23.4	44.731	56.443	15	8	5	3	5	7	7	7	8	5	4	5	360340000	240390000	377260000	1.105	0.737	1.157
Q9FZ48	Ubiquitin-conjugating enzyme E2 36 OS=Arabidopsis thaliana GN=UBC36 PE=1 SV=1	1.623	Up	UBC36	79.7	17.22	127.06	29	10	2	10	12	7	10	10	10	2	2	2	463520000	752540000	395580000	0.863	1.401	0.736
Q9LZ23	ACT domain-containing protein ACR12 OS=Arabidopsis thaliana GN=ACR12 PE=2 SV=1	0.798	Down	ACR12	24.9	33.242	95.353	27	10	10	9	12	6	10	10	9	10	10	9	466060000	371850000	336120000	1.191	0.95	0.859
Q93Y31	ADP-ribosylation factor-like protein 8b OS=Arabidopsis thaliana GN=ARL8B PE=2 SV=1	0.746	Down	ARL8B	29.9	20.403	12.038	6	4	2	3	2	1	4	4	4	2	2	2	56422000	42076000	48991000	1.148	0.856	0.997
Q9SJB9	Nucleic acid-binding, OB-fold-like protein OS=Arabidopsis thaliana GN=At2g04520 PE=2 SV=1	2.07	Up	At2g04520	22.8	16.637	16.555	3	3	3	0	2	1	3	3	3	3	3	3	23032000	47654000	20081000	0.761	1.575	0.664
O82413	Histidine--tRNA ligase, chloroplastic/mitochondrial OS=Arabidopsis thaliana GN=At3g46100 PE=2 SV=1	0.771	Down	At3g46100	14.6	54.558	37.596	7	5	5	2	3	2	4	4	4	4	4	4	46133000	35568000	46336000	1.081	0.833	1.086
F4J5M9	Clathrin light chain 3 OS=Arabidopsis thaliana GN=At3g51890 PE=1 SV=1	1.57	Up	At3g51890	39.5	29.183	134.02	15	8	7	4	7	4	7	8	5	6	7	4	86570000	135950000	77151000	0.867	1.361	0.772
Q9LMK7	Ran-binding protein 1 homolog a OS=Arabidopsis thaliana GN=RANBP1A PE=1 SV=1	1.471	Up	RANBP1A	54.8	25.601	153.34	38	11	8	11	14	13	11	10	11	8	7	8	509030000	748330000	503980000	0.867	1.275	0.858
F4IBT7	Gamma-glutamyl hydrolase 2 OS=Arabidopsis thaliana GN=GGH2 PE=4 SV=1	0.662	Down	GGH2	35.7	36.957	114.8	31	9	8	11	9	11	9	9	8	8	8	7	645590000	427290000	809500000	1.029	0.681	1.29
O04496	Aspartyl protease AED3 OS=Arabidopsis thaliana GN=AED3 PE=1 SV=1	1.536	Up	AED3	28.1	47.661	304.52	56	11	11	17	21	18	10	11	11	10	11	11	1665300000	2557600000	1837200000	0.824	1.266	0.909
O22793	Multiple organellar RNA editing factor 2, chloroplastic OS=Arabidopsis thaliana GN=MORF2 PE=1 SV=1	1.23	Up	MORF2	24.2	24.715	31.292	11	5	4	4	4	3	5	5	5	4	4	4	208480000	256410000	186480000	0.96	1.181	0.859
A0A1P8B6J0	NAD(P)H dehydrogenase B1 OS=Arabidopsis thaliana GN=NDB1 PE=4 SV=1	1.609	Up	NDB1	6.5	55.783	35.157	4	3	3	1	2	1	3	3	3	3	3	3	22562000	36291000	21605000	0.841	1.353	0.806
Q9C829	Nuclear pore complex protein NUP50A OS=Arabidopsis thaliana GN=NUP50A PE=1 SV=1	1.758	Up	NUP50A	18	46.592	62.233	9	7	7	1	7	1	7	7	6	7	7	6	61819000	108650000	70597000	0.769	1.352	0.879
O80517	Uclacyanin-2 OS=Arabidopsis thaliana GN=At2g44790 PE=1 SV=1	1.356	Up	At2g44790	28.2	20.354	77.996	14	4	4	4	5	5	4	4	4	4	4	4	161740000	219190000	247420000	0.772	1.047	1.181
Q9SIY3	Triphosphate tunel metalloenzyme 3 OS=Arabidopsis thaliana GN=TTM3 PE=1 SV=1	1.609	Up	TTM3	12.9	24.162	18.246	5	2	2	1	3	1	2	2	2	2	2	2	13082000	21036000	12924000	0.834	1.342	0.824
P56771	Cytochrome f OS=Arabidopsis thaliana GN=petA PE=3 SV=1	0.776	Down	petA	60.3	35.356	322.83	116	19	19	38	37	41	18	18	19	18	18	19	14145000000	10967000000	13700000000	1.093	0.848	1.059
A0A1P8ASY3	Photosystem II 11 kDa protein-like protein OS=Arabidopsis thaliana GN=LPA19 PE=3 SV=1	0.733	Down	LPA19	19.3	16.203	12.844	5	2	2	2	1	2	2	2	2	2	2	2	10570000	7744400	9050400	1.159	0.849	0.992
Q43870	ATP sulfurylase 2 OS=Arabidopsis thaliana GN=APS2 PE=1 SV=1	0.722	Down	APS2	29.4	53.638	48.214	14	13	8	3	6	5	12	13	11	7	8	6	211080000	152360000	146660000	1.241	0.896	0.863
Q9ZVA4	EP1-like glycoprotein 3 OS=Arabidopsis thaliana GN=At1g78850 PE=1 SV=1	1.515	Up	At1g78850	35.6	49.051	184.11	55	16	6	16	21	18	15	16	16	5	6	6	1475700000	2235800000	1650200000	0.826	1.251	0.923
Q93W05	At1g10590/F20B24_1 OS=Arabidopsis thaliana GN=At1g10590 PE=1 SV=1	1.309	Up	At1g10590	34.5	15.455	33.182	14	5	5	5	5	4	5	5	5	5	5	5	189080000	247520000	155970000	0.957	1.253	0.79
Q39024	Mitogen-activated protein kinase 4 OS=Arabidopsis thaliana GN=MPK4 PE=1 SV=2	1.292	Up	MPK4	33	42.851	71.684	8	9	7	1	5	2	9	9	8	7	7	6	77373000	99973000	42555000	1.056	1.364	0.581
A0A1P8B3H0	S-adenosyl-L-methionine-dependent methyltransferases superfamily protein OS=Arabidopsis thaliana GN=CCoAOMT1 PE=1 SV=1	1.745	Up	CCoAOMT1	40.2	32.473	173.03	31	7	7	10	14	7	7	7	6	7	7	6	397230000	693400000	350620000	0.827	1.443	0.73
Q9SRY5	Glutathione S-transferase F7 OS=Arabidopsis thaliana GN=GSTF7 PE=2 SV=3	4.533	Up	GSTF7	77	23.598	108.98	23	18	8	6	14	3	15	18	14	7	8	6	499990000	2266300000	319340000	0.486	2.203	0.31
A8MRE8	Triosephosphate isomerase OS=Arabidopsis thaliana GN=TIM PE=1 SV=1	0.679	Down	TIM	60.8	32.306	179.53	64	14	14	23	21	20	13	13	14	13	13	14	5963500000	4051300000	5136500000	1.181	0.802	1.017
Q8L604	Putative uncharacterized protein At1g65230 OS=Arabidopsis thaliana GN=At1g65230 PE=2 SV=1	0.689	Down	At1g65230	21	32.736	45.582	11	5	5	4	2	5	5	4	5	5	4	5	103730000	71455000	139810000	0.988	0.681	1.332
A0A178VL84	Pumilio 5 OS=Arabidopsis thaliana GN=PUM5 PE=4 SV=1	1.207	Up	PUM5	5.4	105.63	35.187	6	4	4	3	2	1	4	4	3	4	4	3	22698000	27388000	15562000	1.037	1.252	0.711
Q9LRQ8	Phenolic glucoside malonyltransferase 2 OS=Arabidopsis thaliana GN=PMAT2 PE=1 SV=1	0.339	Down	PMAT2	5.8	50.217	12.356	4	2	2	2	0	2	2	2	2	2	2	2	14627000	4963300	19958000	1.11	0.376	1.514
O49607	Subtilisin-like protease SBT1.6 OS=Arabidopsis thaliana GN=SBT1.6 PE=2 SV=1	0.425	Down	SBT1.6	19.5	81.045	110.46	27	11	11	12	4	11	11	7	11	11	7	11	209240000	88929000	223270000	1.204	0.512	1.285
Q9FLV0	Protein DOWNY MILDEW RESISTANCE 6 OS=Arabidopsis thaliana GN=DMR6 PE=1 SV=1	4.919	Up	DMR6	34.9	39.363	66.212	12	10	10	2	10	0	4	10	4	4	10	4	57439000	282680000	47241000	0.445	2.189	0.366
Q8GYD1	Protein disulfide-isomerase 5-1 OS=Arabidopsis thaliana GN=PDIL5-1 PE=2 SV=1	1.239	Up	PDIL5-1	19.2	16.565	31.71	3	2	2	0	2	1	2	2	2	2	2	2	23047000	28548000	25157000	0.901	1.116	0.983
O22914	Calvin cycle protein CP12-1, chloroplastic OS=Arabidopsis thaliana GN=CP12-1 PE=1 SV=1	2.152	Up	CP12-1	55.6	13.487	191.35	27	6	6	9	10	8	5	6	5	5	6	5	870980000	1873300000	1119200000	0.676	1.455	0.869
O82629	V-type proton ATPase subunit G2 OS=Arabidopsis thaliana GN=VHA-G2 PE=1 SV=2	1.249	Up	VHA-G2	44.3	11.742	49.823	9	4	4	3	3	3	3	3	2	3	3	2	109460000	136820000	127900000	0.878	1.097	1.025
Q9C9I7	Putative uncharacterized protein OS=Arabidopsis thaliana GN=PSB33 PE=2 SV=1	0.731	Down	PSB33	54.4	31.727	164.73	53	14	14	18	19	16	14	14	14	14	14	14	2133900000	1559400000	1720900000	1.182	0.864	0.954
A0A1P8B6D0	Photosystem I subunit l OS=Arabidopsis thaliana GN=PSAL PE=4 SV=1	0.819	Down	PSAL	19.9	30.441	143.72	47	6	6	15	15	17	6	6	6	6	6	6	5046900000	4131000000	5075100000	1.062	0.87	1.068
Q9FI15	Small nuclear ribonucleoprotein-associated protein OS=Arabidopsis thaliana GN=MFC16.13 PE=2 SV=1	0.769	Down	MFC16.13	5.9	26.999	11.656	4	2	2	2	1	1	2	2	2	2	2	2	49832000	38321000	18463000	1.402	1.078	0.52
Q9FF10	Heparanase-like protein 1 OS=Arabidopsis thaliana GN=At5g07830 PE=2 SV=1	1.281	Up	At5g07830	9	60.25	32.636	8	3	3	2	3	3	3	3	3	3	3	3	87351000	111860000	78681000	0.943	1.208	0.849
Q94F00	Phosphatase IMPL1, chloroplastic OS=Arabidopsis thaliana GN=IMPL1 PE=1 SV=2	0.675	Down	IMPL1	35.6	40.445	208.52	34	12	12	12	10	12	12	12	11	12	12	11	742850000	501830000	650810000	1.176	0.794	1.03
Q29Q26	Ankyrin repeat domain-containing protein 2B OS=Arabidopsis thaliana GN=AKR2B PE=1 SV=1	1.722	Up	AKR2B	26.2	36.899	77.776	24	7	5	8	10	6	7	7	7	5	5	5	163370000	281430000	162820000	0.807	1.39	0.804
Q9FKW6	Ferredoxin--NADP reductase, leaf isozyme 1, chloroplastic OS=Arabidopsis thaliana GN=LFNR1 PE=1 SV=1	0.787	Down	LFNR1	55.8	40.326	323.31	147	20	18	52	45	50	20	20	20	18	18	18	14129000000	11117000000	12712000000	1.117	0.879	1.005
Q94CD8	Glucan endo-1,3-beta-glucosidase 4 OS=Arabidopsis thaliana GN=At3g13560 PE=1 SV=1	1.551	Up	At3g13560	8.3	54.415	28.915	10	4	4	3	4	3	4	4	3	4	4	3	28073000	43546000	34871000	0.791	1.227	0.982
Q9LHT0	Tropinone reductase homolog At5g06060 OS=Arabidopsis thaliana GN=At5g06060 PE=2 SV=1	0.713	Down	At5g06060	37.5	28.292	63.417	22	9	8	8	6	8	9	8	9	8	7	8	518670000	370290000	509320000	1.113	0.794	1.093
Q9SF20	F26K24.7 protein OS=Arabidopsis thaliana GN=F26K24.7 PE=2 SV=1	10.352	Up	F26K24.7	21.6	16.805	19.334	5	3	3	1	3	1	2	3	2	2	3	2	51240000	530550000	69611000	0.236	2.443	0.321
Q84M92	Actin-related protein 4 OS=Arabidopsis thaliana GN=ARP4 PE=1 SV=1	1.625	Up	ARP4	13.2	48.936	52.243	10	4	4	3	4	3	4	4	3	4	4	3	53238000	86542000	50093000	0.841	1.367	0.791
Q8RWQ2	At3g54435 OS=Arabidopsis thaliana GN=At3g54440 PE=2 SV=1	1.655	Up	At3g54440	5.2	125.41	36.437	6	6	6	1	3	2	5	5	6	5	5	6	27447000	45422000	73370000	0.563	0.932	1.505
F4ICX9	TSK-associating protein 1 OS=Arabidopsis thaliana GN=TSA1 PE=1 SV=1	0.276	Down	TSA1	34.8	84.375	233.46	42	19	19	16	4	22	15	12	18	15	12	18	385140000	106240000	730700000	0.945	0.261	1.794
Q8LPS1	Long chain acyl-CoA synthetase 6, peroxisomal OS=Arabidopsis thaliana GN=LACS6 PE=1 SV=1	1.354	Up	LACS6	7.8	76.603	31.998	8	4	4	2	4	2	3	4	3	3	4	3	39236000	53116000	49986000	0.827	1.12	1.054
A0A1P8AWY5	Sirohydrochlorin ferrochelatase B OS=Arabidopsis thaliana GN=SIRB PE=4 SV=1	1.479	Up	SIRB	49.1	24.103	70.048	13	6	6	4	5	4	5	6	5	5	6	5	48071000	71125000	42910000	0.89	1.316	0.794
Q96319	Enhancer of rudimentary homolog OS=Arabidopsis thaliana GN=At5g10810 PE=3 SV=1	2.604	Up	At5g10810	11	12.502	10.405	3	1	1	1	2	0	1	1	1	1	1	1	7859600	20473000	7571700	0.657	1.711	0.633
F4IPY6	Translin family protein OS=Arabidopsis thaliana GN=At2g37020 PE=4 SV=1	0.832	Down	At2g37020	14.3	35.053	29.461	9	4	4	3	3	3	3	4	4	3	4	4	41455000	34541000	36702000	1.104	0.919	0.977
O04499	2,3-bisphosphoglycerate-independent phosphoglycerate mutase 1 OS=Arabidopsis thaliana GN=PGM1 PE=2 SV=3	3.717	Up	PGM1	54.8	60.579	323.31	76	29	18	15	34	27	22	28	28	12	17	17	517250000	1923500000	1308200000	0.414	1.539	1.047
Q9SPK5	Formate--tetrahydrofolate ligase OS=Arabidopsis thaliana GN=THFS PE=2 SV=1	0.792	Down	THFS	31.1	67.801	145.84	44	16	16	14	15	15	14	15	15	14	15	15	522640000	414060000	540140000	1.062	0.841	1.097
P20431	ATPase 3, plasma membrane-type OS=Arabidopsis thaliana GN=AHA3 PE=1 SV=2	0.64	Down	AHA3	31.4	104.45	107.33	33	25	11	12	11	10	24	23	24	10	10	10	240950000	154210000	253230000	1.115	0.714	1.172
P42758	Dehydrin Xero 2 OS=Arabidopsis thaliana GN=XERO2 PE=2 SV=1	0.811	Down	XERO2	19.7	20.909	14.657	3	2	2	0	2	1	1	1	2	1	1	2	14773000	11981000	12092000	1.141	0.925	0.934
Q9ZUS6	At2g37400 OS=Arabidopsis thaliana GN=At2g37400 PE=2 SV=1	1.233	Up	At2g37400	25.5	38.155	37.73	9	7	6	4	4	1	7	7	7	6	6	6	99295000	122480000	90575000	0.954	1.176	0.87
Q9LIG6	NifU-like protein 4, mitochondrial OS=Arabidopsis thaliana GN=NIFU4 PE=2 SV=1	1.63	Up	NIFU4	22.3	30.504	32.049	5	4	3	1	4	0	4	4	4	3	3	3	44332000	72255000	38205000	0.859	1.4	0.74
Q9FK81	Stress-response A/B barrel domain-containing protein At5g22580 OS=Arabidopsis thaliana GN=At5g22580 PE=1 SV=1	0.767	Down	At5g22580	59.5	12.349	49.756	23	6	6	9	6	8	6	6	6	6	6	6	438710000	336520000	687170000	0.9	0.69	1.41
O82663	Succinate dehydrogenase [ubiquinone] flavoprotein subunit 1, mitochondrial OS=Arabidopsis thaliana GN=SDH1-1 PE=1 SV=1	1.368	Up	SDH1-1	32.8	69.656	170.6	46	16	16	14	19	13	16	15	15	16	15	15	514650000	704000000	590590000	0.853	1.167	0.979
P82869	Peptidyl-prolyl cis-trans isomerase CYP37, chloroplastic OS=Arabidopsis thaliana GN=CYP37 PE=1 SV=3	0.683	Down	CYP37	41.2	50.482	271.06	61	19	19	20	20	21	19	17	18	19	17	18	1541500000	1052800000	1248100000	1.204	0.822	0.974
C0LGN2	Probable leucine-rich repeat receptor-like serine/threonine-protein kinase At3g14840 OS=Arabidopsis thaliana GN=LRR-RLK PE=2 SV=1	0.762	Down	LRR-RLK	3.9	112.28	27.023	5	3	3	3	1	1	3	3	3	3	3	3	45535000	34676000	35278000	1.183	0.901	0.916
A0A1P8AUM8	3-isopropylmalate dehydrogenase OS=Arabidopsis thaliana GN=IMD3 PE=3 SV=1	0.772	Down	IMD3	45.6	45.77	125.64	32	14	6	11	11	10	14	13	13	6	6	6	837890000	646420000	795470000	1.103	0.851	1.047
Q9FK25	Flavone 3'-O-methyltransferase 1 OS=Arabidopsis thaliana GN=OMT1 PE=1 SV=1	1.275	Up	OMT1	18.2	39.618	36.834	7	6	6	1	4	2	5	6	5	5	6	5	36087000	45976000	54550000	0.792	1.01	1.198
Q84QC1	Gamma-glutamylcyclotransferase 2-3 OS=Arabidopsis thaliana GN=GGCT2;3 PE=1 SV=1	1.456	Up	GGCT2;3	27.1	22.229	80.711	4	4	4	0	4	0	3	4	2	3	4	2	38674000	56305000	36011000	0.886	1.29	0.825
Q8LAJ9	At1g22520 OS=Arabidopsis thaliana GN=At1g22520 PE=2 SV=1	0.685	Down	At1g22520	29.3	10.357	19.483	4	2	2	1	2	1	2	2	2	2	2	2	49991000	34232000	49750000	1.119	0.767	1.114
Q93WX6	Cysteine desulfurase 1, chloroplastic OS=Arabidopsis thaliana GN=NFS2 PE=1 SV=1	1.811	Up	NFS2	9.3	50.485	29.68	9	4	4	2	3	4	3	3	4	3	3	4	32115000	58189000	34349000	0.773	1.4	0.827
Q94BU8	AT5g28050/F15F15_120 OS=Arabidopsis thaliana GN=GSDA PE=2 SV=1	1.614	Up	GSDA	25.9	20.001	21.689	8	3	3	1	4	3	3	3	3	3	3	3	58092000	93715000	114910000	0.653	1.054	1.292
Q9SX52	Phytochrome-associated serine/threonine-protein phosphatase 1 OS=Arabidopsis thaliana GN=FYPP1 PE=1 SV=1	1.722	Up	FYPP1	19.5	34.819	54.518	13	5	5	3	6	4	5	5	5	5	5	5	39602000	68189000	41434000	0.796	1.371	0.833
Q8H0U5	Protein TIC 62, chloroplastic OS=Arabidopsis thaliana GN=TIC62 PE=1 SV=1	0.689	Down	TIC62	65.8	68.341	323.31	96	30	30	37	24	35	29	30	30	29	30	30	3266500000	2249800000	3816800000	1.05	0.723	1.227
F4KBP5	Protein CHROMATIN REMODELING 4 OS=Arabidopsis thaliana GN=CHR4 PE=2 SV=1	1.324	Up	CHR4	1.4	247.92	11.534	4	2	2	2	1	1	2	2	2	2	2	2	39146000	51803000	53594000	0.812	1.075	1.112
Q9ZWJ3	UDP-glycosyltransferase 85A2 OS=Arabidopsis thaliana GN=UGT85A2 PE=2 SV=1	2.866	Up	UGT85A2	3.7	54.364	13.725	5	2	2	2	2	1	2	2	2	2	2	2	8915500	25561000	10410000	0.596	1.708	0.696
Q9LT39	Leucine-rich repeat (LRR) family protein OS=Arabidopsis thaliana GN=At3g20820 PE=2 SV=1	0.522	Down	At3g20820	49.6	39.862	261.23	48	15	15	15	14	19	12	14	14	12	14	14	1907900000	995030000	2141500000	1.135	0.592	1.274
Q9SFF6	Pectin acetylesterase 12 OS=Arabidopsis thaliana GN=PAE12 PE=2 SV=1	0.833	Down	PAE12	14.9	46.326	44.201	13	5	5	3	4	6	5	5	5	5	5	5	69346000	57689000	77897000	1.015	0.845	1.14
Q9LIN3	Glycine-rich RNA-binding protein RZ1A OS=Arabidopsis thaliana GN=RZ1A PE=1 SV=1	1.376	Up	RZ1A	21.6	26.923	30.643	10	5	5	4	4	2	5	4	3	5	4	3	90442000	124430000	93057000	0.881	1.212	0.907
P25071	Calmodulin-like protein 12 OS=Arabidopsis thaliana GN=CML12 PE=1 SV=3	4.778	Up	CML12	24.4	36.807	88.117	11	8	8	1	9	1	4	8	4	4	8	4	118620000	566500000	105470000	0.45	2.15	0.4
Q39141	Chlorophyll a-b binding protein, chloroplastic OS=Arabidopsis thaliana GN=Lhb1B2 PE=2 SV=1	0.593	Down	Lhb1B2	85.3	28.054	35.54	100	13	1	34	33	33	12	13	12	1	1	1	16080000000	9541800000	12119000000	1.278	0.758	0.963
Q9FIJ4	DNA repair RAD52-like protein 2, chloroplastic OS=Arabidopsis thaliana GN=RAD52-2 PE=1 SV=1	1.269	Up	RAD52-2	36.7	21.409	60.591	16	6	6	5	7	4	6	6	5	6	6	5	303690000	385270000	269600000	0.95	1.206	0.844
Q9FKM2	Mitochondrial outer membrane protein porin 4 OS=Arabidopsis thaliana GN=VDAC4 PE=1 SV=1	0.677	Down	VDAC4	20.4	29.505	42.669	9	5	5	4	2	3	5	5	5	5	5	5	194500000	131830000	234430000	1.041	0.705	1.254
Q8GW78	ATP-dependent Clp protease ATP-binding subunit CLPT2, chloroplastic OS=Arabidopsis thaliana GN=CLPT2 PE=1 SV=1	1.368	Up	CLPT2	40.2	26.56	100.11	17	6	6	4	7	6	5	6	6	5	6	6	399700000	546540000	411610000	0.883	1.208	0.909
Q9C9P3	ADP-glucose pyrophosphorylase family protein OS=Arabidopsis thaliana GN=F9E10.24 PE=1 SV=1	0.735	Down	F9E10.24	19.8	45.563	47.999	25	7	7	10	6	9	7	7	7	7	7	7	301690000	221540000	314010000	1.081	0.794	1.125
Q9LST0	AT5g60160/f15l12_20 OS=Arabidopsis thaliana GN=At5g60160 PE=2 SV=1	1.293	Up	At5g60160	18.7	52.425	76.167	16	6	6	5	6	5	6	6	6	6	6	6	126640000	163840000	131790000	0.9	1.164	0.936
Q940J8	Pectin acetylesterase 7 OS=Arabidopsis thaliana GN=PAE7 PE=2 SV=1	0.723	Down	PAE7	54.5	42.125	241.6	53	16	13	17	14	22	15	15	16	12	12	13	1547600000	1119500000	1704400000	1.062	0.768	1.17
O82230	Nucleoid-associated protein At2g24020, chloroplastic OS=Arabidopsis thaliana GN=At2g24020 PE=2 SV=2	1.225	Up	At2g24020	37.4	19.811	59.364	17	6	4	5	6	6	6	6	6	4	4	4	231400000	283420000	190570000	0.984	1.205	0.81
Q9M2D8	Uncharacterized protein At3g61260 OS=Arabidopsis thaliana GN=At3g61260 PE=1 SV=1	0.607	Down	At3g61260	66.5	23.144	155.55	44	14	13	16	14	14	13	12	12	12	11	11	1506100000	914720000	1394000000	1.184	0.719	1.096
Q9SUR0	AT4G23670 protein OS=Arabidopsis thaliana GN=At4g23670 PE=2 SV=1	0.381	Down	At4g23670	89.4	17.518	234.48	95	16	14	33	28	34	16	16	16	14	14	14	11023000000	4201100000	10989000000	1.262	0.481	1.258
Q9LE22	Probable calcium-binding protein CML27 OS=Arabidopsis thaliana GN=CML27 PE=1 SV=1	1.463	Up	CML27	67.1	18.35	154.38	28	7	7	9	10	9	7	7	7	7	7	7	315700000	461790000	280790000	0.895	1.309	0.796
A0A1I9LR27	Thioredoxin superfamily protein OS=Arabidopsis thaliana GN=PRXQ PE=4 SV=1	0.708	Down	PRXQ	72.7	17.028	197.37	69	13	13	24	22	23	13	13	13	13	13	13	10593000000	7501200000	8154500000	1.211	0.857	0.932
Q8RYC3	Expressed protein OS=Arabidopsis thaliana GN=At2g33845 PE=2 SV=1	1.319	Up	At2g33845	43.4	20.122	41.895	14	5	5	4	6	4	5	4	5	5	4	5	131850000	173850000	87056000	1.007	1.328	0.665
Q9C4Z6	Receptor for activated C kinase 1B OS=Arabidopsis thaliana GN=RACK1B PE=1 SV=1	0.731	Down	RACK1B	32.2	35.8	42.403	6	9	2	3	2	1	8	7	6	1	2	2	34696000	25373000	30720000	1.146	0.838	1.015
Q8GXU7	At4g13612 OS=Arabidopsis thaliana GN=At4g13615 PE=2 SV=1	0.54	Down	At4g13615	38	7.1778	29.853	4	2	2	2	1	1	2	2	1	2	2	1	16079000	8677100	0	1.299	0.701
Q9FFV1	At5g54760 OS=Arabidopsis thaliana GN=MBG8.2 PE=1 SV=1	1.968	Up	MBG8.2	44.2	12.62	38.985	6	4	1	1	5	0	4	4	3	1	1	0	57356000	112870000	56078000	0.76	1.496	0.743
Q9SJ03	Expressed protein OS=Arabidopsis thaliana GN=At2g21960 PE=2 SV=2	0.731	Down	At2g21960	29.2	35.806	70.128	24	10	10	10	8	6	9	9	10	9	9	10	279300000	204200000	282580000	1.094	0.8	1.107
Q9LFH5	60S ribosomal protein L12-2 OS=Arabidopsis thaliana GN=RPL12B PE=1 SV=1	1.448	Up	RPL12B	53	17.97	106.5	23	8	2	6	11	6	7	8	7	1	2	1	1293500000	1871600000	1542300000	0.824	1.193	0.983
Q9LFG2	Diaminopimelate epimerase, chloroplastic OS=Arabidopsis thaliana GN=DAPF PE=1 SV=1	1.205	Up	DAPF	21	38.984	63.86	15	8	8	4	5	6	8	7	8	8	7	8	251910000	303480000	319510000	0.864	1.041	1.096
F4KDZ4	Malate dehydrogenase OS=Arabidopsis thaliana GN=PMDH2 PE=3 SV=1	0.67	Down	PMDH2	60.1	34.975	323.31	116	14	13	42	38	36	14	13	14	13	12	13	8391900000	5619000000	7744200000	1.157	0.775	1.068
A0A1P8B7K5	Costars family protein OS=Arabidopsis thaliana GN=At4g33640 PE=1 SV=1	1.803	Up	At4g33640	28	18.337	53.11	5	3	3	2	2	1	3	3	3	3	3	3	58010000	104550000	63357000	0.77	1.388	0.841
Q9SRR8	2Fe-2S ferredoxin-like superfamily protein OS=Arabidopsis thaliana GN=F21O3.19 PE=2 SV=1	1.212	Up	F21O3.19	29.6	17.602	35.65	13	5	5	5	2	6	3	4	5	3	4	5	107050000	129780000	100780000	0.951	1.153	0.896
Q93VP3	Eukaryotic translation initiation factor 5A-2 OS=Arabidopsis thaliana GN=ELF5A-2 PE=1 SV=1	1.431	Up	ELF5A-2	87.4	17.14	254.9	55	14	9	17	25	13	10	13	10	6	9	6	2507300000	3588500000	1892800000	0.942	1.348	0.711
Q2V2S7	NAD(P)H-quinone oxidoreductase subunit M, chloroplastic OS=Arabidopsis thaliana GN=ndhM PE=2 SV=1	0.827	Down	ndhM	57.1	24.795	112.25	26	8	8	9	9	8	8	8	7	8	8	7	676030000	558940000	663310000	1.068	0.883	1.048
Q9ZSI6	At4g01700 OS=Arabidopsis thaliana GN=At4g01700 PE=2 SV=1	1.485	Up	At4g01700	22.1	31.464	53.784	12	5	5	6	3	3	5	5	4	5	5	4	75758000	112450000	70509000	0.878	1.304	0.818
Q8GUK4	Subtilisin-like protease SBT3.13 OS=Arabidopsis thaliana GN=SBT3.13 PE=2 SV=1	0.549	Down	SBT3.13	10.2	81.479	62.508	12	6	5	4	2	6	5	4	6	4	3	5	81050000	44471000	115420000	1.009	0.554	1.437
Q9ZNT0	Protein SUPPRESSOR OF K(+) TRANSPORT GROWTH DEFECT 1 OS=Arabidopsis thaliana GN=SKD1 PE=1 SV=1	2.621	Up	SKD1	22.5	48.592	77.495	13	8	8	3	7	3	5	8	7	5	8	7	49433000	129420000	67737000	0.601	1.575	0.824
Q9SYI5	Putative uncharacterized protein AT4g01870 OS=Arabidopsis thaliana GN=At4g01870 PE=2 SV=1	2.717	Up	At4g01870	11	72.814	50.524	10	6	6	2	7	1	6	6	4	6	6	4	35233000	95740000	38701000	0.623	1.693	0.684
Q9SKB2	Leucine-rich repeat receptor-like serine/threonine/tyrosine-protein kinase SOBIR1 OS=Arabidopsis thaliana GN=SOBIR1 PE=1 SV=1	6.316	Up	SOBIR1	7.6	71.111	30.207	5	4	4	1	4	0	3	4	3	3	4	3	12208000	77036000	11271000	0.364	2.299	0.336
Q84J81	Fes1A OS=Arabidopsis thaliana GN=Fes1A PE=2 SV=1	1.296	Up	Fes1A	21.2	40.395	42.066	11	7	7	3	6	2	7	7	6	7	7	6	79696000	103250000	57512000	0.994	1.288	0.718
O65660	PLAT domain-containing protein 1 OS=Arabidopsis thaliana GN=PLAT1 PE=1 SV=1	0.583	Down	PLAT1	27.1	20.136	73.876	18	4	3	6	6	6	4	4	4	3	3	3	1552500000	905090000	1433900000	1.197	0.698	1.105
Q9LFJ9	UDP-glycosyltransferase 78D4 OS=Arabidopsis thaliana GN=UGT78D4 PE=2 SV=2	1.237	Up	UGT78D4	9.5	48.546	11.274	2	2	2	0	2	0	2	2	2	2	2	2	34074000	42146000	33838000	0.929	1.149	0.922
Q9FPT1	Ubiquitin carboxyl-terminal hydrolase 12 OS=Arabidopsis thaliana GN=UBP12 PE=2 SV=2	1.416	Up	UBP12	31.5	130.61	238.07	65	31	15	14	33	18	25	30	26	12	15	12	416200000	589720000	497200000	0.831	1.177	0.992
Q500U9	At1g03030 OS=Arabidopsis thaliana GN=At1g03030 PE=2 SV=1	0.75	Down	At1g03030	12.6	34.057	18.613	5	3	3	2	1	2	2	2	3	2	2	3	24726000	18538000	19588000	1.18	0.885	0.935
A0A1P8ATH2	Tetratricopeptide repeat (TPR)-like superfamily protein OS=Arabidopsis thaliana GN=PRP39 PE=1 SV=1	2.459	Up	PRP39	3.8	60.958	14.344	4	2	2	1	2	1	2	2	2	2	2	2	6193800	15214000	16642000	0.488	1.2	1.312
Q9SZB2	Protein TIC 22, chloroplastic OS=Arabidopsis thaliana GN=TIC22 PE=1 SV=1	0.721	Down	TIC22	28.7	30.105	52.284	18	7	7	6	6	6	7	6	7	7	6	7	222070000	160160000	212380000	1.12	0.808	1.072
Q43295	Adenylyl-sulfate kinase 1, chloroplastic OS=Arabidopsis thaliana GN=APK1 PE=1 SV=1	1.378	Up	APK1	25	29.787	69.745	6	5	5	2	1	3	5	4	5	5	4	5	83381000	114940000	84068000	0.886	1.221	0.893
Q9M9M9	Probable NADH dehydrogenase [ubiquinone] 1 alpha subcomplex subunit 12 OS=Arabidopsis thaliana GN=At3g03100 PE=1 SV=1	1.202	Up	At3g03100	18.2	18.316	20.276	7	3	3	2	3	2	3	3	3	3	3	3	118440000	142530000	138890000	0.889	1.069	1.042
Q8L719	THO complex subunit 4B OS=Arabidopsis thaliana GN=ALY2 PE=1 SV=1	1.443	Up	ALY2	15.8	30.78	55.326	11	5	5	3	4	4	5	5	5	5	5	5	84770000	122390000	119750000	0.778	1.123	1.099
Q9MAT3	F13M7.16 protein OS=Arabidopsis thaliana GN=At1g04850 PE=2 SV=1	1.251	Up	At1g04850	26.4	46.603	66.69	17	10	10	5	7	5	9	10	9	9	10	9	121160000	151570000	127070000	0.909	1.137	0.954
P42763	Dehydrin ERD14 OS=Arabidopsis thaliana GN=ERD14 PE=1 SV=1	1.488	Up	ERD14	53	20.786	92.367	32	8	7	9	12	11	7	8	8	6	7	7	703020000	1045700000	1063000000	0.75	1.116	1.134
Q9LPE9	At1g44820 OS=Arabidopsis thaliana GN=At1g44820 PE=2 SV=1	0.803	Down	At1g44820	25.8	48.958	64.124	19	10	10	7	7	5	9	8	9	9	8	9	135890000	109190000	138940000	1.062	0.853	1.085
Q9FT52	ATP synthase subunit d, mitochondrial OS=Arabidopsis thaliana GN=At3g52300 PE=1 SV=3	1.203	Up	At3g52300	83.3	19.586	204.4	74	24	24	26	27	21	24	24	23	24	24	23	2058200000	2477200000	1932600000	0.955	1.149	0.896
Q9SXP7	Octanoyltransferase OS=Arabidopsis thaliana GN=LIP2 PE=2 SV=1	1.228	Up	LIP2	62.6	26.421	122.09	25	11	11	10	7	8	9	11	11	9	11	11	349710000	429510000	327670000	0.948	1.164	0.888
O80634	Photosynthetic NDH subunit of lumenal location 1, chloroplastic OS=Arabidopsis thaliana GN=PNSL1 PE=1 SV=2	0.795	Down	PNSL1	52.5	26.962	269.25	61	14	14	18	21	22	12	13	14	12	13	14	1181200000	940000000	1100000000	1.1	0.875	1.024
Q9SRV5	5-methyltetrahydropteroyltriglutamate--homocysteine methyltransferase 2 OS=Arabidopsis thaliana GN=MS2 PE=1 SV=1	0.748	Down	MS2	46.4	84.583	130.87	25	29	9	8	8	9	29	29	29	9	9	9	571680000	427410000	608710000	1.067	0.798	1.136
Q8L7E3	Vacuolar-sorting receptor 7 OS=Arabidopsis thaliana GN=VSR7 PE=2 SV=2	3.324	Up	VSR7	6.2	69.799	24.755	4	4	3	0	3	1	3	4	4	2	3	3	16310000	54258000	21113000	0.534	1.775	0.691
Q949Y0	Ubiquitin carboxyl-terminal hydrolase 6 OS=Arabidopsis thaliana GN=UBP6 PE=1 SV=1	1.46	Up	UBP6	23.7	53.695	57.244	11	9	9	3	7	1	8	9	8	8	9	8	71840000	104920000	61065000	0.906	1.323	0.77
Q9ZVU4	At1g55450/T5A14_14 OS=Arabidopsis thaliana GN=At1g55450 PE=2 SV=1	1.525	Up	At1g55450	28	34.475	62.627	16	9	9	3	8	5	6	9	6	6	9	6	142350000	217030000	108230000	0.913	1.392	0.694
Q9FK88	Alkaline/neutral invertase E, chloroplastic OS=Arabidopsis thaliana GN=INVE PE=1 SV=1	1.738	Up	INVE	7.9	69.239	32.783	7	4	4	2	3	2	4	4	3	4	4	3	36825000	63972000	39673000	0.786	1.366	0.847
Q8W457	Cysteine proteinases superfamily protein OS=Arabidopsis thaliana GN=T20O10_40 PE=2 SV=1	1.729	Up	T20O10_40	13	35.672	27.462	3	2	2	1	2	0	2	2	1	2	2	1	13848000	23957000	0	0.733	1.267
Q94JY3	Alpha/beta-Hydrolases superfamily protein OS=Arabidopsis thaliana GN=MDB19.5 PE=2 SV=1	1.442	Up	MDB19.5	56.1	26.53	87.242	26	8	8	9	9	8	8	8	8	8	8	8	180250000	259770000	204170000	0.839	1.21	0.951
Q43387	Peroxidase 71 OS=Arabidopsis thaliana GN=PER71 PE=1 SV=1	3.411	Up	PER71	17.7	34.889	82.657	7	4	4	2	3	2	3	4	3	3	4	3	21218000	72304000	23177000	0.545	1.859	0.596
Q9C6Z3	Pyruvate dehydrogenase E1 component subunit beta-2, chloroplastic OS=Arabidopsis thaliana GN=PDH-E1 BETA PE=2 SV=1	1.283	Up	PDH-E1	16.7	44.244	44.163	14	6	6	5	3	6	6	6	5	6	6	5	87806000	112680000	158360000	0.734	0.942	1.324
Q8L719	Ubiquitin carboxyl-terminal hydrolase 26 OS=Arabidopsis thaliana GN=UBP26 PE=1 SV=1	1.211	Up	UBP26	21.3	54.79	58.233	10	9	9	3	8	5	6	9	6	6	9	6	142350000	217030000	108230000	0.913	1.392	0.694
