# Supplementary material for: Ubiquitome profiling reveals a regulatory pattern of UPL3 with UBP12 on metabolic-leaf senescence
Source: Life Sci Alliance. 2022 Aug 4;5(12):e202201492. doi: 10.26508/lsa.202201492 (PMC9354775; doi:10.26508/lsa.202201492)
Supplement: Supplementary file 7 [file LSA-2022-01492_Supplemental_Data_6.xlsx]

## Sheet: 工作表1
Supplementary dataset S6 The differentional display expression targets of upl3/wt transcriptome dataset
Gene ID	FC ([upl3-1-Ctrl] vs [Col-0-Ctrl])	Log FC ([upl3-1-Ctrl] vs [Col-0-Ctrl])	Regulation ([upl3-1-Ctrl] vs [Col-0-Ctrl])	Gene Symbol	Description
AT2G35980	2.38872	1.25624	up	NHL10	late embryogenesis abundant hydroxyproline-rich glycoprotein [Source:EMBL;Acc:AEC09185.1]
AT2G14620	4.24024	2.08415	up	XTH10	xyloglucan:xyloglucosyl transferase [Source:EMBL;Acc:AEC06315.1]
AT1G33950	1.31458	0.394599	up	AT1G33950	avirulence induced protein [Source:EMBL;Acc:AEE31645.1]
AT1G44130	5.32889	2.41383	up	AT1G44130	aspartyl protease-like protein [Source:EMBL;Acc:AEE32023.1]
AT1G66700	-1.33935	-0.42153	down	PXMT1	S-adenosylmethionine-dependent methyltransferase domain-containing protein [Source:EMBL;Acc:AEE34547.1]
AT1G02450	9.50011	3.24794	up	NIMIN1	protein NIM1-interacting 1 [Source:EMBL;Acc:AEE27431.1]
AT1G03660	2.27975	1.18888	up	AT1G03660	Ankyrin-repeat containing protein [Source:EMBL;Acc:AEE27594.1]
AT3G47050	-1.47737	-0.563029	down	AT3G47050	beta-glucosidase [Source:EMBL;Acc:AEE78238.1]
AT5G23160	22.0683	4.46391	up	AT5G23160	uncharacterized protein [Source:EMBL;Acc:AED93128.1]
AT1G71390	1.34439	0.426949	up	AtRLP11	receptor like protein 11 [Source:EMBL;Acc:AEE35196.1]
AT3G28210	8.95213	3.16223	up	PMZ	zinc finger AN1 domain-containing stress-associated protein 12 [Source:EMBL;Acc:AEE77416.1]
AT5G44460	-1	0	down	CML43	putative calcium-binding protein CML43 [Source:EMBL;Acc:AED95111.1]
AT4G13890	-1.33392	-0.415667	down	SHM5	glycine hydroxymethyltransferase [Source:EMBL;Acc:AEE83342.1]
AT3G28510	1.41946	0.505341	up	AT3G28510	AAA-type ATPase family protein [Source:EMBL;Acc:AEE77454.1]
AT3G28580	3.4992	1.80702	up	AT3G28580	AAA-type ATPase family protein [Source:EMBL;Acc:AEE77462.1]
AT3G11340	1.06786	0.094722	up	AT3G11340	UDP-glycosyltransferase-like protein [Source:EMBL;Acc:AEE75032.1]
AT3G61390	2.0924	1.06516	up	AT3G61390	U-box domain-containing protein 36 [Source:EMBL;Acc:AEE80194.1]
AT2G26400	-2.79278	-1.4817	down	ARD	1,2-dihydroxy-3-keto-5-methylthiopentene dioxygenase 1 [Source:EMBL;Acc:AEC07833.1]
AT4G14630	1.4654	0.551292	up	GLP9	germin-like protein subfamily 1 member 8 [Source:EMBL;Acc:AEE83469.1]
AT5G19880	-1.93167	-0.949852	down	AT5G19880	peroxidase 58 [Source:EMBL;Acc:AED92761.1]
AT1G17615	2.08858	1.06252	up	AT1G17615	Disease resistance protein (TIR-NBS class) [Source:EMBL;Acc:AEE29614.1]
AT3G10320	4.86199	2.28155	up	AT3G10320	Glycosyltransferase family 61 protein [Source:EMBL;Acc:AEE74891.1]
AT5G07650	4.4182	2.14346	up	AT5G07650	Actin-binding FH2 protein [Source:EMBL;Acc:AED91189.1]
AT5G11210	-1.87164	-0.904306	down	GLR2.5	glutamate receptor 2.5 [Source:EMBL;Acc:AED91648.1]
AT1G47890	1.49312	0.578326	up	AtRLP7	receptor like protein 7 [Source:EMBL;Acc:AEE32225.1]
AT5G53110	4.91046	2.29586	up	AT5G53110	RING/U-box domain-containing protein-like protein [Source:EMBL;Acc:AED96304.1]
AT3G44350	1.05158	0.0725574	up	anac061	putative NAC domain-containing protein 61 [Source:EMBL;Acc:AEE77896.1]
AT2G04515	2.7872	1.47882	up	AT2G04515	uncharacterized protein [Source:EMBL;Acc:AEC05841.1]
AT2G33080	-1.32373	-0.404609	down	RLP28	receptor like protein 28 [Source:EMBL;Acc:AEC08783.1]
AT2G45760	1.8923	0.920144	up	BAP2	BON1-associated protein 2 [Source:EMBL;Acc:AEC10598.1]
AT1G13310	1.9165	0.938472	up	AT1G13310	Endosomal targeting BRO1-like domain-containing protein [Source:EMBL;Acc:AEE28997.1]
AT3G53150	-3.66176	-1.87254	down	UGT73D1	UDP-glucosyl transferase 73D1 [Source:EMBL;Acc:AEE79042.1]
AT3G13610	-3.67807	-1.87895	down	AT3G13610	oxidoreductase, 2OG-Fe(II) oxygenase family protein [Source:EMBL;Acc:AEE75382.1]
AT4G21840	1.19994	0.262967	up	ATMSRB8	peptide methionine sulfoxide reductase B8 [Source:EMBL;Acc:AEE84510.1]
AT5G02780	2.82305	1.49725	up	GSTL1	glutathione transferase lambda 1 [Source:EMBL;Acc:AED90517.1]
AT4G17660	2.22532	1.15401	up	AT4G17660	protein kinase family protein [Source:EMBL;Acc:AEE83930.1]
AT4G11655	1.37029	0.454479	up	AT4G11655	uncharacterized protein [Source:EMBL;Acc:AEE83035.1]
AT4G10500	-1.82271	-0.866086	down	AT4G10500	oxidoreductase, 2OG-Fe(II) oxygenase family protein [Source:EMBL;Acc:AEE82891.1]
AT1G33840	1.23389	0.303217	up	AT1G33840	uncharacterized protein [Source:EMBL;Acc:AEE31631.1]
AT2G14610	-8.80442	-3.13823	down	PR1	pathogenesis-related protein 1 [Source:EMBL;Acc:AEC06314.1]
AT4G37390	1.49253	0.577765	up	YDK1	indole-3-acetic acid-amido synthetase GH3.2 [Source:EMBL;Acc:AEE86787.1]
AT1G30850	4.30381	2.10561	up	RSH4	protein root hair specific 4 [Source:EMBL;Acc:AEE31285.1]
AT5G47850	2.48092	1.31088	up	CCR4	serine/threonine-protein kinase-like protein CCR4 [Source:EMBL;Acc:AED95580.1]
AT5G38250	3.83324	1.93856	up	AT5G38250	Protein kinase family protein [Source:EMBL;Acc:AED94286.1]
AT3G11000	1.30419	0.383157	up	AT3G11000	DCD (Development and Cell Death) domain protein [Source:EMBL;Acc:AEE74991.1]
AT2G39530	-1.43554	-0.521596	down	AT2G39530	UPF0497 membrane protein [Source:EMBL;Acc:AEC09691.1]
AT1G66600	1.38002	0.464687	up	WRKY63	putative WRKY transcription factor 63 [Source:EMBL;Acc:AEE34534.1]
AT5G46960	-1.02109	-0.0301164	down	AT5G46960	plant invertase/pectin methylesterase inhibitor domain-containing protein [Source:EMBL;Acc:AED95452.1]
AT3G45330	-2.02837	-1.02032	down	AT3G45330	concanavalin A-like lectin kinase-like protein [Source:EMBL;Acc:AEE78024.1]
AT3G13433	-1.03104	-0.0440993	down	AT3G13433	uncharacterized protein [Source:EMBL;Acc:AEE75351.1]
AT5G62480	4.00024	2.00009	up	ATGSTU9	glutathione S-transferase tau 9 [Source:EMBL;Acc:AED97612.1]
AT5G22380	4.00166	2.0006	up	NAC090	NAC domain-containing protein 90 [Source:EMBL;Acc:AED93020.1]
AT1G56060	1.57592	0.656197	up	AT1G56060	uncharacterized protein [Source:EMBL;Acc:AEE33337.1]
AT3G60966	-1.28669	-0.363665	down	AT3G60966	protein binding / zinc ion binding protein [Source:EMBL;Acc:AEE80132.1]
AT3G47040	-1.43554	-0.521596	down	AT3G47040	Glycosyl hydrolase family protein [Source:EMBL;Acc:AEE78236.1]
AT3G21520	-1.60003	-0.678096	down	DMP1	DUF679 domain membrane protein 1 [Source:EMBL;Acc:AEE76519.1]
AT3G48850	-2.52244	-1.33482	down	PHT3;2	phosphate transporter 3;2 [Source:EMBL;Acc:AEE78463.1]
AT3G51350	7.4958	2.90608	up	AT3G51350	aspartyl protease family protein [Source:EMBL;Acc:AEE78782.1]
AT1G53620	-1.92615	-0.945723	down	AT1G53620	uncharacterized protein [Source:EMBL;Acc:AEE32970.1]
AT1G74140	1.3726	0.456908	up	AT1G74140	Rhomboid-related intramembrane serine protease family protein [Source:EMBL;Acc:AEE35556.1]
AT1G16420	2.76831	1.46901	up	MC8	metacaspase 8 [Source:EMBL;Acc:AEE29449.1]
AT3G11640	1.98851	0.991687	up	AT3G11640	uncharacterized protein [Source:EMBL;Acc:AEE75078.1]
AT4G11170	-1.04843	-0.0682364	down	AT4G11170	putative disease resistance protein [Source:EMBL;Acc:AEE82980.1]
AT4G10860	-12.7593	-3.67348	down	AT4G10860	uncharacterized protein [Source:EMBL;Acc:AEE82937.1]
AT2G29470	-1.01221	-0.017513	down	ATGSTU3	glutathione S-transferase tau 3 [Source:EMBL;Acc:AEC08258.1]
AT1G09080	1.15808	0.211736	up	BIP3	Hsp70 protein BiP chaperone BIP-L [Source:EMBL;Acc:AEE28392.1]
AT2G44240	-9.06732	-3.18068	down	AT2G44240	uncharacterized protein [Source:EMBL;Acc:AEC10395.1]
AT2G44390	1.54028	0.62319	up	AT2G44390	cysteine/histidine-rich C1 domain-containing protein [Source:EMBL;Acc:AEC10415.1]
AT1G57570	-1	0	down	AT1G57570	mannose-binding lectin-like protein [Source:EMBL;Acc:AEE33437.1]
AT5G52730	1.48007	0.565666	up	AT5G52730	copper transport family protein [Source:EMBL;Acc:AED96254.1]
AT4G00700	-1.1048	-0.143788	down	AT4G00700	C2 calcium/lipid-binding and phosphoribosyltransferase C-terminal domain-containing protein [Source:EMBL;Acc:AEE81923.1]
AT4G35180	-1.62337	-0.698992	down	LHT7	LYS/HIS transporter 7 [Source:EMBL;Acc:AEE86477.1]
AT5G13080	-1.94833	-0.962239	down	WRKY75	putative WRKY transcription factor 75 [Source:EMBL;Acc:AED91848.1]
AT3G02480	1.9775	0.983676	up	AT3G02480	Late embryogenesis abundant protein (LEA) family protein [Source:EMBL;Acc:AEE73816.1]
AT1G21245	2.7496	1.45922	up	AT1G21245	leucine-rich repeat receptor-like protein kinase [Source:EMBL;Acc:AEE30078.1]
AT1G78710	-1	0	down	TBL42	trichome birefringence-like 42 [Source:EMBL;Acc:AEE36141.1]
AT1G05340	2.99115	1.5807	up	AT1G05340	uncharacterized protein [Source:EMBL;Acc:AEE27827.1]
AT4G05540	-1.28337	-0.35994	down	AT4G05540	DNA helicase domain-containing protein [Source:EMBL;Acc:AEE82533.1]
AT1G53100	1.01198	0.0171804	up	AT1G53100	Core-2/I-branching beta-1,6-N-acetylglucosaminyltransferase-like protein [Source:EMBL;Acc:AEE32890.1]
AT1G14540	2.02568	1.01841	up	AT1G14540	peroxidase 4 [Source:EMBL;Acc:AEE29178.1]
AT5G66890	1.20314	0.266803	up	AT5G66890	putative disease resistance protein [Source:EMBL;Acc:AED98275.1]
AT2G43570	-4.06958	-2.02488	down	CHI	chitinase class 4-like protein [Source:EMBL;Acc:AEC10291.1]
AT3G48640	3.18469	1.67115	up	AT3G48640	uncharacterized protein [Source:EMBL;Acc:AEE78440.1]
AT5G26690	1.54247	0.62524	up	AT5G26690	heavy-metal-associated domain-containing protein [Source:EMBL;Acc:AED93575.1]
AT3G13435	1.82922	0.871231	up	AT3G13435	uncharacterized protein [Source:EMBL;Acc:AEE75352.1]
AT5G44585	-2.35953	-1.2385	down	AT5G44585	uncharacterized protein [Source:EMBL;Acc:AED95135.1]
AT3G09960	-2.04215	-1.03009	down	AT3G09960	calcineurin-like metallo-phosphoesterase-like protein [Source:EMBL;Acc:AEE74841.1]
AT5G58080	1.87173	0.904373	up	ARR18	response regulator 18 [Source:EMBL;Acc:AED96995.1]
AT2G13810	-5.96315	-2.57607	down	ALD1	AGD2-like defense response protein 1 [Source:EMBL;Acc:AEC06261.1]
AT1G01480	1.76249	0.817615	up	ACS2	1-aminocyclopropane-1-carboxylate synthase 2 [Source:EMBL;Acc:AEE27294.1]
AT4G05030	1.12125	0.16511	up	AT4G05030	putative copper transport protein [Source:EMBL;Acc:AEE82462.1]
AT4G37070	2.45266	1.29435	up	AtPLAIVA	patatin-like protein [Source:EMBL;Acc:AEE86746.1]
AT1G57650	14.4636	3.85436	up	AT1G57650	ATP binding protein [Source:EMBL;Acc:AEE33448.1]
AT2G29100	-2.22307	-1.15255	down	ATGLR2.9	glutamate receptor 2.9 [Source:EMBL;Acc:AEC08211.1]
AT5G48290	-1.9219	-0.942533	down	AT5G48290	heavy metal transport/detoxification domain-containing protein [Source:EMBL;Acc:AED95647.1]
AT5G22545	1.46437	0.550277	up	AT5G22545	uncharacterized protein [Source:EMBL;Acc:AED93039.1]
AT5G44990	-1.44347	-0.529545	down	AT5G44990	Glutathione S-transferase family protein [Source:EMBL;Acc:AED95186.1]
AT1G55790	-8.22173	-3.03944	down	AT1G55790	uncharacterized protein [Source:EMBL;Acc:AEE33297.1]
AT1G47980	-1	0	down	AT1G47980	uncharacterized protein [Source:EMBL;Acc:AEE32234.1]
AT1G61080	-1.10989	-0.15041	down	AT1G61080	hydroxyproline-rich glycoprotein-like protein [Source:EMBL;Acc:AEE33775.1]
AT1G08860	-5.09699	-2.34965	down	BON3	protein BONZAI 3 [Source:EMBL;Acc:AEE28360.1]
AT5G48400	-2.40735	-1.26745	down	ATGLR1.2	glutamate receptor 1.2 [Source:EMBL;Acc:AED95665.1]
AT3G15536	-1.82101	-0.864739	down	AT3G15536	Unknown gene.[Source:TAIR;Acc:AT3G15536]
AT1G05880	1.37154	0.455801	up	ARI12	putative E3 ubiquitin-protein ligase ARI12 [Source:EMBL;Acc:AEE27910.1]
AT1G65610	-2.19004	-1.13096	down	ATGH9A2	endoglucanase 7 [Source:EMBL;Acc:AEE34400.1]
AT3G12910	1.33112	0.412636	up	AT3G12910	no apical meristem domain-containing transcriptional regulator [Source:EMBL;Acc:AEE75259.1]
AT3G24900	-1.00575	-0.00827098	down	AtRLP39	receptor like protein 39 [Source:EMBL;Acc:AEE76960.1]
AT5G11920	1.95535	0.967427	up	AtcwINV6	beta-fructofuranosidase, insoluble isoenzyme CWINV6 [Source:EMBL;Acc:AED91740.1]
AT2G45570	1.60851	0.685729	up	CYP76C2	cytochrome P450 76C2 [Source:EMBL;Acc:AEC10572.1]
AT1G19250	-2.21447	-1.14696	down	FMO1	putative flavin-containing monooxygenase 1 [Source:EMBL;Acc:AEE29823.1]
AT5G09470	2.37981	1.25085	up	DIC3	dicarboxylate carrier 3 [Source:EMBL;Acc:AED91400.1]
AT1G13550	-2.46753	-1.30307	down	AT1G13550	uncharacterized protein [Source:EMBL;Acc:AEE29032.1]
AT2G19190	-1.2976	-0.375845	down	FRK1	senescence-induced receptor-like serine/threonine-protein kinase [Source:EMBL;Acc:AEC06856.1]
AT4G04540	1.98657	0.990279	up	CRK39	putative cysteine-rich receptor-like protein kinase 39 [Source:EMBL;Acc:AEE82397.1]
AT1G32350	-4.4141	-2.14212	down	AOX1D	alternative oxidase 3 [Source:EMBL;Acc:AEE31467.1]
AT2G37440	1.05925	0.0830475	up	AT2G37440	endonuclease/exonuclease/phosphatase domain-containing protein [Source:EMBL;Acc:AEC09400.1]
AT4G39610	2.44082	1.28737	up	AT4G39610	uncharacterized protein [Source:EMBL;Acc:AEE87093.1]
AT1G14880	-1.8749	-0.906812	down	PCR1	cadmium resistance protein 1 [Source:EMBL;Acc:AEE29238.1]
AT2G18660	-1.73316	-0.793402	down	PNP-A	EG45-like domain-containing protein 2 [Source:EMBL;Acc:AEC06790.1]
AT1G13520	-1.51012	-0.594663	down	AT1G13520	uncharacterized protein [Source:EMBL;Acc:AEE29029.1]
AT1G11990	46.2574	5.53161	up	AT1G11990	O-fucosyltransferase family protein [Source:EMBL;Acc:AEE28824.1]
AT3G30120	8.92136	3.15726	up	AT3G30120	pseudogene.[Source:TAIR;Acc:AT3G30120]
AT1G65690	1.78107	0.832746	up	AT1G65690	late embryogenesis abundant (LEA) hydroxyproline-rich glycoprotein [Source:EMBL;Acc:AEE34412.1]
AT2G42480	-1.12068	-0.164378	down	AT2G42480	TRAF-like family protein [Source:EMBL;Acc:AEC10125.1]
AT3G29000	4.91615	2.29753	up	AT3G29000	putative calcium-binding protein CML30 [Source:EMBL;Acc:AEE77519.1]
AT4G30430	1.45372	0.539746	up	TET9	tetraspanin9 [Source:EMBL;Acc:AEE85764.1]
AT5G40010	-2.07483	-1.053	down	AATP1	AAA-ATPase 1 [Source:EMBL;Acc:AED94501.1]
AT3G04070	1.86622	0.900115	up	NAC047	NAC domain containing protein 47 [Source:EMBL;Acc:AEE74033.1]
AT3G21080	2.09387	1.06617	up	AT3G21080	ABC transporter-like protein [Source:EMBL;Acc:AEE76458.1]
AT3G46280	1.4774	0.563065	up	AT3G46280	protein kinase-like protein [Source:EMBL;Acc:AEE78142.1]
AT1G66960	-17.1518	-4.10029	down	AT1G66960	lupeol synthase 5 [Source:EMBL;Acc:AEE34578.1]
AT1G75040	-1.86915	-0.902382	down	PR5	pathogenesis-related protein 5 [Source:EMBL;Acc:AEE35665.1]
AT1G66870	1.03487	0.0494437	up	AT1G66870	carbohydrate-binding X8 domain-containing protein [Source:EMBL;Acc:AEE34566.1]
AT5G59220	4.31445	2.10918	up	HAI1	protein phosphatase [Source:EMBL;Acc:AED97159.1]
AT1G07900	2.32401	1.21662	up	LBD1	LOB domain-containing protein 1 [Source:EMBL;Acc:AEE28208.1]
AT5G14490	2.10555	1.0742	up	anac085	NAC domain containing protein 85 [Source:EMBL;Acc:AED92040.1]
AT4G25845	1.74221	0.800915	up	AT4G25845	uncharacterized protein [Source:EMBL;Acc:AEE85122.1]
AT3G13950	-1.15281	-0.205157	down	AT3G13950	uncharacterized protein [Source:EMBL;Acc:AEE75444.1]
AT5G22540	-1.17067	-0.227338	down	AT5G22540	uncharacterized protein [Source:EMBL;Acc:AED93038.1]
AT4G27220	17.3654	4.11814	up	AT4G27220	NB-ARC domain-containing disease resistance protein [Source:EMBL;Acc:AEE85312.1]
AT2G04450	-1.14375	-0.193775	down	ATNUDT6	nudix hydrolase 6 [Source:EMBL;Acc:AEC05837.1]
AT1G13830	-1.18618	-0.246325	down	AT1G13830	carbohydrate-binding X8 domain-containing protein [Source:EMBL;Acc:AEE29073.1]
AT1G50400	4.2618	2.09146	up	AT1G50400	mitochondrial import receptor subunit TOM40 [Source:EMBL;Acc:AEE32544.1]
AT3G60470	1.71159	0.775334	up	AT3G60470	uncharacterized protein [Source:EMBL;Acc:AEE80065.1]
AT4G30640	2.83182	1.50173	up	AT4G30640	putative F-box/LRR-repeat protein 19 [Source:EMBL;Acc:AEE85789.1]
AT1G13540	5.5251	2.466	up	AT1G13540	uncharacterized protein [Source:EMBL;Acc:AEE29031.1]
AT3G55700	-7.90621	-2.98299	down	AT3G55700	UDP-glycosyltransferase-like protein [Source:EMBL;Acc:AEE79424.1]
AT3G51860	-1.20257	-0.266126	down	CAX3	vacuolar cation/proton exchanger 3 [Source:EMBL;Acc:AEE78853.1]
AT4G05497	7.73545	2.95149	up	AT4G05497	putative F-box/LRR-repeat protein 9 [Source:EMBL;Acc:AEE82528.1]
AT5G24200	-1.60643	-0.68386	down	AT5G24200	alpha/beta-hydrolase domain-containing protein [Source:EMBL;Acc:AED93270.1]
AT1G33960	-1.56966	-0.650453	down	AIG1	protein AIG1 [Source:EMBL;Acc:AEE31647.1]
AT2G43000	-2.92679	-1.54932	down	NAC042	NAC domain-containing protein 42 [Source:EMBL;Acc:AEC10196.1]
AT1G21240	1.51086	0.595372	up	WAK3	wall-associated receptor kinase 3 [Source:EMBL;Acc:AEE30077.1]
AT1G51890	1.12139	0.165286	up	AT1G51890	putative leucine-rich repeat protein kinase [Source:EMBL;Acc:AEE32729.1]
AT3G54150	1.75763	0.813632	up	AT3G54150	S-adenosyl-L-methionine-dependent methyltransferase-like protein [Source:EMBL;Acc:AEE79193.1]
AT3G57260	-2.35253	-1.23421	down	BGL2	glucan endo-1,3-beta-D-glucosidase [Source:EMBL;Acc:AEE79633.1]
AT5G22520	2.32682	1.21836	up	AT5G22520	uncharacterized protein [Source:EMBL;Acc:AED93036.1]
AT1G69930	-1.3663	-0.450276	down	ATGSTU11	glutathione S-transferase TAU 11 [Source:EMBL;Acc:AEE34999.1]
AT1G57630	1.35811	0.441597	up	AT1G57630	Toll-Interleukin-Resistance domain-containing protein [Source:EMBL;Acc:AEE33446.1]
AT2G34500	-1.23605	-0.305739	down	CYP710A1	cytochrome P450, family 710, subfamily A [Source:EMBL;Acc:AEC08982.1]
AT1G04600	-1.04452	-0.0628346	down	XIA	myosin XI A [Source:EMBL;Acc:AEE27720.1]
AT2G44400	2.35927	1.23834	up	AT2G44400	cysteine/histidine-rich C1 domain-containing protein [Source:EMBL;Acc:AEC10416.1]
AT5G52720	-2.72243	-1.44489	down	AT5G52720	copper transport family protein [Source:EMBL;Acc:AED96253.1]
AT3G25010	-1.34907	-0.43197	down	AtRLP41	receptor like protein 41 [Source:EMBL;Acc:AEE76964.1]
AT1G65360	1.90475	0.929601	up	AGL23	protein agamous-like 23 [Source:EMBL;Acc:AEE34365.1]
AT4G09300	1.11478	0.156753	up	AT4G09300	LisH and RanBPM domain-containing protein [Source:EMBL;Acc:AEE82740.1]
AT5G55450	-2.00178	-1.00129	down	AT5G55450	bifunctional inhibitor/lipid-transfer protein/seed storage 2S albumin-like protein [Source:EMBL;Acc:AED96630.1]
AT5G64000	-1.06971	-0.0972158	down	SAL2	SAL2 phosphatase [Source:EMBL;Acc:AED97828.1]
AT2G44370	4.15994	2.05656	up	AT2G44370	cysteine/histidine-rich C1 domain-containing protein [Source:EMBL;Acc:AEC10413.1]
AT1G76470	-1.99367	-0.995428	down	AT1G76470	Rossmann-fold NAD(P)-binding domain-containing protein [Source:EMBL;Acc:AEE35846.1]
AT5G25260	1.13159	0.178346	up	AT5G25260	Flotillin-like protein 2 [Source:EMBL;Acc:AED93418.1]
AT4G28556	3.00913	1.58935	up	RIC7	PAK-box/P21-Rho-binding family protein [Source:EMBL;Acc:AEE85505.1]
AT4G37010	-2.00861	-1.0062	down	CEN2	calcium-binding protein CML19 [Source:EMBL;Acc:AEE86734.1]
AT5G16900	-2.31777	-1.21274	down	AT5G16900	putative LRR receptor-like serine/threonine-protein kinase [Source:EMBL;Acc:AED92356.1]
AT3G50770	-1.5931	-0.671834	down	CML41	putative calcium-binding protein CML41 [Source:EMBL;Acc:AEE78708.1]
AT4G19970	1.27541	0.350963	up	AT4G19970	uncharacterized protein [Source:EMBL;Acc:AEE84253.1]
AT1G35230	1.07707	0.107111	up	AGP5	arabinogalactan protein 5 [Source:EMBL;Acc:AEE31770.1]
AT3G61198	-3.85689	-1.94744	down	AT3G61198	other RNA.[Source:TAIR;Acc:AT3G61198]
AT2G27660	1.1351	0.182814	up	AT2G27660	cysteine/histidine-rich C1 domain-containing protein [Source:EMBL;Acc:AEC08023.1]
AT3G46090	1.69103	0.757899	up	ZAT7	C2H2 and C2HC zinc finger-containing protein [Source:EMBL;Acc:AEE78112.1]
AT5G57220	2.113	1.07929	up	CYP81F2	cytochrome P450, family 81, subfamily F, polypeptide 2 [Source:EMBL;Acc:AED96867.1]
AT3G29250	-5.96679	-2.57696	down	AT3G29250	Rossmann-fold NAD(P)-binding domain-containing protein [Source:EMBL;Acc:AEE77557.1]
AT1G78780	1.30142	0.380091	up	AT1G78780	pathogenesis-related protein [Source:EMBL;Acc:AEE36151.1]
AT5G26170	1.18336	0.242893	up	WRKY50	putative WRKY transcription factor 50 [Source:EMBL;Acc:AED93532.1]
AT1G65483	-16.4231	-4.03766	down	AT1G65483	uncharacterized protein [Source:EMBL;Acc:AEE34384.1]
AT1G36622	2.18354	1.12667	up	AT1G36622	uncharacterized protein [Source:EMBL;Acc:AEE31868.1]
AT3G07600	-1.37766	-0.462216	down	AT3G07600	heavy-metal-associated domain-containing protein [Source:EMBL;Acc:AEE74572.1]
AT4G11890	-1.40771	-0.493349	down	AT4G11890	protein kinase family protein [Source:EMBL;Acc:AEE83066.1]
AT4G04500	-1.10438	-0.143237	down	CRK37	cysteine-rich receptor-like protein kinase 37 [Source:EMBL;Acc:AEE82395.1]
AT5G56960	-1.57823	-0.658307	down	AT5G56960	putative transcription factor bHLH041 [Source:EMBL;Acc:AED96827.1]
AT3G26830	-4.98345	-2.31715	down	PAD3	cytochrome P450 71B15 [Source:EMBL;Acc:AEE77220.1]
AT1G04980	1.33006	0.411494	up	ATPDI10	protein disulfide-isomerase A6 [Source:EMBL;Acc:AEE27773.1]
AT5G01900	1.51582	0.6001	up	WRKY62	putative WRKY transcription factor 62 [Source:EMBL;Acc:AED90407.1]
AT5G22530	-1.20407	-0.267924	down	AT5G22530	uncharacterized protein [Source:EMBL;Acc:AED93037.1]
AT5G52760	-1.04134	-0.0584379	down	AT5G52760	copper transport family protein [Source:EMBL;Acc:AED96257.1]
AT4G08555	2.28298	1.19092	up	AT4G08555	uncharacterized protein [Source:EMBL;Acc:AEE82657.1]
AT1G21525	1.31291	0.392771	up	AT1G21525	pseudogene.[Source:TAIR;Acc:AT1G21525]
AT1G04490	1.50896	0.593558	up	AT1G04490	uncharacterized protein [Source:EMBL;Acc:AEE27704.1]
AT4G24000	-2.29316	-1.19734	down	CSLG2	cellulose synthase-like protein G2 [Source:EMBL;Acc:AEE84838.1]
AT1G30190	5.17359	2.37117	up	AT1G30190	uncharacterized protein [Source:EMBL;Acc:AEE31189.1]
AT2G32130	1.03658	0.0518327	up	AT2G32130	uncharacterized protein [Source:EMBL;Acc:AEC08638.1]
AT1G51860	-1.53145	-0.614901	down	AT1G51860	putative LRR receptor-like serine/threonine-protein kinase [Source:EMBL;Acc:AEE32726.1]
AT3G14380	26.8629	4.74755	up	AT3G14380	uncharacterized protein [Source:EMBL;Acc:AEE75510.1]
AT3G57950	-1.71819	-0.78089	down	AT3G57950	uncharacterized protein [Source:EMBL;Acc:AEE79722.1]
AT3G51330	1.1565	0.209759	up	AT3G51330	aspartyl protease family protein [Source:EMBL;Acc:AEE78780.1]
AT5G22570	2.16786	1.11627	up	WRKY38	putative WRKY transcription factor 38 [Source:EMBL;Acc:AED93044.1]
AT1G56550	-1.36738	-0.45141	down	RXGT1	rhamnogalacturonan II specific xylosyltransferase [Source:EMBL;Acc:AEE33406.1]
AT1G73810	-1.2372	-0.307073	down	AT1G73810	core-2/I-branching beta-1,6-N-acetylglucosaminyltransferase-like protein [Source:EMBL;Acc:AEE35511.1]
AT4G23150	-1.33605	-0.417976	down	CRK7	cysteine-rich receptor-like protein kinase 7 [Source:EMBL;Acc:AEE84716.1]
AT3G17690	1.27484	0.350317	up	ATCNGC19	cyclic nucleotide gated channel 19 [Source:EMBL;Acc:AEE75993.1]
AT4G23610	1.42694	0.512926	up	AT4G23610	late embryogenesis abundant hydroxyproline-rich glycoprotein [Source:EMBL;Acc:AEE84784.1]
AT2G04495	-1.07035	-0.0980895	down	AT2G04495	uncharacterized protein [Source:EMBL;Acc:AEC05839.1]
AT1G01680	-1.20412	-0.267984	down	ATPUB54	U-box domain-containing protein 54 [Source:EMBL;Acc:AEE27321.1]
AT3G25882	-1.70162	-0.766909	down	NIMIN-2	NIM1-interacting 2 protein [Source:EMBL;Acc:AEE77083.1]
AT5G41730	1.4425	0.528575	up	AT5G41730	protein kinase-like protein [Source:EMBL;Acc:AED94717.1]
AT1G02230	6.51991	2.70485	up	ANAC004	NAC domain-containing protein 4 [Source:EMBL;Acc:AEE27405.1]
AT2G45220	-1.37931	-0.463943	down	AT2G45220	pectinesterase 17 [Source:EMBL;Acc:AEC10527.1]
AT4G18990	2.32556	1.21758	up	XTH29	xyloglucan:xyloglucosyl transferase [Source:EMBL;Acc:AEE84120.1]
AT5G42830	-1.58151	-0.661299	down	AT5G42830	HXXXD-type acyl-transferase-like protein [Source:EMBL;Acc:AED94871.1]
AT4G17670	1.76571	0.820251	up	AT4G17670	uncharacterized protein [Source:EMBL;Acc:AEE83931.1]
AT5G38900	-6.1233	-2.61431	down	AT5G38900	DSBA oxidoreductase family protein [Source:EMBL;Acc:AED94373.1]
AT2G20142	1.94895	0.962696	up	AT2G20142	Toll-Interleukin-Resistance domain-containing protein [Source:EMBL;Acc:AEC06971.1]
AT3G57240	-4.77061	-2.25418	down	BG3	beta-1,3-glucanase 3 [Source:EMBL;Acc:AEE79631.1]
AT1G51850	1.26435	0.338398	up	AT1G51850	Leucine-rich repeat protein kinase family protein [Source:EMBL;Acc:AEE32725.1]
AT4G14390	-1.44709	-0.533151	down	AT4G14390	ankyrin repeat-containing protein [Source:EMBL;Acc:AEE83436.1]
AT4G21850	1.25118	0.323285	up	MSRB9	peptide methionine sulfoxide reductase B9 [Source:EMBL;Acc:AEE84511.1]
AT5G46115	6.79301	2.76405	up	AT5G46115	uncharacterized protein [Source:EMBL;Acc:AED95342.1]
AT1G65510	1.08971	0.123945	up	AT1G65510	uncharacterized protein [Source:EMBL;Acc:AEE34391.1]
AT3G01600	27.0681	4.75852	up	anac044	NAC domain containing protein 44 [Source:EMBL;Acc:AEE73694.1]
AT3G10815	1.52884	0.612437	up	AT3G10815	RING/U-box domain-containing protein [Source:EMBL;Acc:AEE74958.1]
AT5G42380	1.41361	0.499382	up	CML39	calcium-binding protein CML37 [Source:EMBL;Acc:AED94803.1]
AT5G10760	-1.82649	-0.869077	down	AT5G10760	aspartyl protease family protein [Source:EMBL;Acc:AED91593.1]
AT5G02490	1.35137	0.434425	up	AT5G02490	heat shock protein 70 [Source:EMBL;Acc:AED90479.1]
AT5G13320	2.51786	1.3322	up	GDG1	auxin-responsive GH3 family protein [Source:EMBL;Acc:AED91880.1]
AT4G16350	8.82125	3.14098	up	CBL6	calcineurin B-like protein 6 [Source:EMBL;Acc:AEE83734.1]
AT4G14450	2.82753	1.49954	up	AT4G14450	uncharacterized protein [Source:EMBL;Acc:AEE83446.1]
AT5G24110	-1.02761	-0.0392876	down	WRKY30	WRKY DNA-binding protein 30 [Source:EMBL;Acc:AED93258.1]
AT1G33030	-1.59484	-0.673416	down	AT1G33030	O-methyltransferase-like protein [Source:EMBL;Acc:AEE31551.1]
AT5G09290	-1.17826	-0.236663	down	AT5G09290	putative SAL4 phosphatase [Source:EMBL;Acc:AED91370.1]
AT4G15417	-1.16654	-0.222241	down	ATRTL1	protein RNAse II-like 1 [Source:EMBL;Acc:AEE83600.1]
AT4G28790	-9.31166	-3.21904	down	AT4G28790	transcription factor bHLH23 [Source:EMBL;Acc:AEE85544.1]
AT5G08240	1.04842	0.0682107	up	AT5G08240	uncharacterized protein [Source:EMBL;Acc:AED91273.1]
AT4G23310	-8.1938	-3.03453	down	CRK23	putative cysteine-rich receptor-like protein kinase 23 [Source:EMBL;Acc:AEE84737.1]
AT4G21120	-1.40059	-0.486036	down	CAT1	amino acid transporter 1 [Source:EMBL;Acc:AEE84405.1]
AT1G02930	-1.41565	-0.501465	down	ATGSTF6	glutathione S-transferase 1 [Source:EMBL;Acc:AEE27498.1]
AT1G21110	2.34577	1.23006	up	AT1G21110	O-methyltransferase family protein [Source:EMBL;Acc:AEE30065.1]
AT5G54240	5.49996	2.45942	up	AT5G54240	uncharacterized protein [Source:EMBL;Acc:AED96472.1]
AT3G61190	2.65988	1.41136	up	BAP1	BON1-associated protein 1 [Source:EMBL;Acc:AEE80171.1]
AT1G78410	-1.01521	-0.0217773	down	AT1G78410	VQ motif-containing protein [Source:EMBL;Acc:AEE36102.1]
AT5G46050	1.35974	0.443328	up	ATPTR3	peptide transporter PTR3-A [Source:EMBL;Acc:AED95332.1]
AT1G03850	1.16681	0.222567	up	AT1G03850	monothiol glutaredoxin-S13 [Source:EMBL;Acc:AEE27623.1]
AT5G55460	-1.60304	-0.680808	down	AT5G55460	bifunctional inhibitor/lipid-transfer protein/seed storage 2S albumin-like protein [Source:EMBL;Acc:AED96631.1]
AT4G39830	1.32196	0.402684	up	AT4G39830	putative L-ascorbate oxidase [Source:EMBL;Acc:AEE87124.1]
AT5G64810	-1.16707	-0.222892	down	WRKY51	putative WRKY transcription factor 51 [Source:EMBL;Acc:AED97953.1]
AT1G21120	1.19003	0.250999	up	AT1G21120	O-methyltransferase family protein [Source:EMBL;Acc:AEE30066.1]
AT5G17760	-1.05127	-0.0721364	down	AT5G17760	AAA-type ATPase family protein [Source:EMBL;Acc:AED92465.1]
AT1G30900	-1.33604	-0.417962	down	VSR3;3	vacuolar sorting receptor 6 [Source:EMBL;Acc:AEE31291.1]
AT3G12220	-1.16762	-0.223576	down	scpl16	serine carboxypeptidase-like 16 [Source:EMBL;Acc:AEE75169.1]
AT3G04717	-4.92182	-2.29919	down	AT3G04717	Encodes a Wound-induced protein (WIP) family protein.[Source:TAIR;Acc:AT3G04717]
AT1G64220	22.8159	4.51197	up	TOM7-2	mitochondrial import receptor subunit TOM7-2 [Source:EMBL;Acc:AEE34211.1]
AT5G41550	1.87158	0.904258	up	AT5G41550	TIR-NBS-LRR class disease resistance protein [Source:EMBL;Acc:AED94691.1]
AT3G26440	-1.68993	-0.75696	down	AT3G26440	uncharacterized protein [Source:EMBL;Acc:AEE77159.1]
AT4G23280	-1.5091	-0.593693	down	CRK20	putative cysteine-rich receptor-like protein kinase 20 [Source:EMBL;Acc:AEE84733.1]
AT2G25090	-1.06965	-0.0971417	down	SnRK3.18	CBL-interacting serine/threonine-protein kinase 16 [Source:EMBL;Acc:AEC07656.1]
AT4G23140	-1.35693	-0.440347	down	CRK6	cysteine-rich receptor-like protein kinase 6 [Source:EMBL;Acc:AEE84714.1]
AT1G60830	1.06072	0.085041	up	AT1G60830	RNA recognition motif-containing protein [Source:EMBL;Acc:AEE33737.1]
AT3G60420	1.09319	0.128544	up	AT3G60420	Phosphoglycerate mutase family protein [Source:EMBL;Acc:AEE80061.1]
AT3G11010	-1.23311	-0.302303	down	AtRLP34	receptor like protein 34 [Source:EMBL;Acc:AEE74993.1]
AT3G46080	-2.02758	-1.01976	down	AT3G46080	C2H2-type zinc finger protein [Source:EMBL;Acc:AEE78110.1]
AT1G02920	-1.55781	-0.639517	down	GST11	glutathione S-transferase 11 [Source:EMBL;Acc:AEE27496.1]
AT2G32680	-2.14904	-1.10369	down	AtRLP23	receptor like protein 23 [Source:EMBL;Acc:AEC08715.1]
AT4G24026	-2.53008	-1.33918	down	AT4G24026	uncharacterized protein [Source:EMBL;Acc:AEE84843.1]
AT3G22910	2.14139	1.09855	up	AT3G22910	Ca2+-transporting ATPase [Source:EMBL;Acc:AEE76690.1]
AT5G47960	2.81266	1.49194	up	SMG1	RAB GTPase homolog A4C [Source:EMBL;Acc:AED95599.1]
AT5G36260	1.83902	0.878934	up	AT5G36260	aspartyl protease family protein [Source:EMBL;Acc:AED94063.1]
AT5G35580	-1.88802	-0.916873	down	AT5G35580	kinase-like protein [Source:EMBL;Acc:AED93983.1]
AT1G26420	1.41483	0.500627	up	AT1G26420	FAD-binding and BBE domain-containing protein [Source:EMBL;Acc:AEE30688.1]
AT1G10340	-1.178	-0.236336	down	AT1G10340	ankyrin repeat-containing protein [Source:EMBL;Acc:AEE28567.1]
AT4G28390	1.11312	0.15461	up	AAC3	ADP/ATP carrier 3 protein [Source:EMBL;Acc:AEE85477.1]
AT3G01830	-1.06201	-0.0867977	down	AT3G01830	putative calcium-binding protein CML40 [Source:EMBL;Acc:AEE73721.1]
AT1G09932	-1.4888	-0.574152	down	AT1G09932	Phosphoglycerate mutase family protein [Source:EMBL;Acc:AEE28517.1]
AT5G39670	-1.20216	-0.265626	down	AT5G39670	putative calcium-binding protein CML45 [Source:EMBL;Acc:AED94462.1]
AT3G50480	-1.49278	-0.578005	down	HR4	RPW8-like protein 4 [Source:EMBL;Acc:AEE78671.1]
AT1G43910	1.22899	0.297475	up	AT1G43910	P-loop containing nucleoside triphosphate hydrolase-like protein [Source:EMBL;Acc:AEE32007.1]
AT1G17170	2.74782	1.45829	up	GST	glutathione S-transferase TAU 24 [Source:EMBL;Acc:AEE29554.1]
AT1G01340	1.0096	0.0137849	up	CNGC10	cyclic nucleotide gated channel [Source:EMBL;Acc:AEE27273.1]
AT5G50760	-3.09942	-1.632	down	AT5G50760	SAUR-like auxin-responsive protein [Source:EMBL;Acc:AED95989.1]
AT3G47480	-1.12738	-0.172977	down	AT3G47480	putative calcium-binding protein CML47 [Source:EMBL;Acc:AEE78286.1]
AT4G21680	1.34142	0.423766	up	NRT1.8	nitrate transporter 1.8 [Source:EMBL;Acc:AEE84489.1]
AT4G38560	-1.10854	-0.148658	down	AT4G38560	phospholipase like protein (PEARLI 4) [Source:EMBL;Acc:AEE86946.1]
AT5G25250	1.07115	0.0991669	up	AT5G25250	Flotillin-like protein 1 [Source:EMBL;Acc:AED93417.1]
AT2G29110	-4.78431	-2.25831	down	ATGLR2.8	glutamate receptor 2.8 [Source:EMBL;Acc:AEC08212.1]
AT4G39670	-1.05816	-0.0815644	down	AT4G39670	glycolipid transfer protein [Source:EMBL;Acc:AEE87101.1]
AT4G03320	5.86996	2.55335	up	tic20-IV	translocon at the inner envelope membrane of chloroplasts 20-IV [Source:EMBL;Acc:AEE82306.1]
AT5G39520	1.19596	0.25817	up	AT5G39520	uncharacterized protein [Source:EMBL;Acc:AED94443.1]
AT2G32140	1.19011	0.251093	up	AT2G32140	transmembrane receptor protein [Source:EMBL;Acc:AEC08639.1]
AT3G50930	1.67794	0.746695	up	BCS1	cytochrome BC1 synthesis [Source:EMBL;Acc:AEE78728.1]
AT1G15520	-1.22831	-0.296678	down	ABCG40	ABC transporter G family member 40 [Source:EMBL;Acc:AEE29332.1]
AT2G29350	-2.16206	-1.1124	down	SAG13	senescence-associated protein 13 [Source:EMBL;Acc:AEC08241.1]
AT4G08950	1.19348	0.255177	up	EXO	Phosphate-responsive 1 family protein [Source:EMBL;Acc:AEE82700.1]
AT3G18250	-4.13	-2.04614	down	AT3G18250	Putative membrane lipoprotein [Source:EMBL;Acc:AEE76072.1]
AT5G48657	1.06824	0.0952412	up	AT5G48657	defense protein-like protein [Source:EMBL;Acc:AED95707.1]
AT1G67980	-5.61354	-2.48891	down	CCOAMT	caffeoyl-CoA 3-O-methyltransferase [Source:EMBL;Acc:AEE34732.1]
AT4G14365	-1.1745	-0.232046	down	XBAT34	putative E3 ubiquitin-protein ligase XBAT34 [Source:EMBL;Acc:AEE83429.1]
AT5G05300	2.38111	1.25163	up	AT5G05300	uncharacterized protein [Source:EMBL;Acc:AED90853.1]
AT2G37750	1.63574	0.709947	up	AT2G37750	uncharacterized protein [Source:EMBL;Acc:AEC09442.1]
AT5G09876	-1.93793	-0.954518	down	AT5G09876	uncharacterized protein [Source:EMBL;Acc:AED91459.1]
AT2G22470	-1.51599	-0.600263	down	AGP2	arabinogalactan protein 2 [Source:EMBL;Acc:AEC07309.1]
AT4G18250	-2.9755	-1.57313	down	AT4G18250	putative receptor serine/threonine kinase [Source:EMBL;Acc:AEE84016.1]
AT3G47780	-1.43006	-0.516074	down	ATATH6	ABC transporter A family member 7 [Source:EMBL;Acc:AEE78328.1]
AT1G22110	-3.67557	-1.87797	down	AT1G22110	structural constituent of ribosome [Source:EMBL;Acc:AEE30198.1]
AT2G24850	-1.009	-0.0129311	down	TAT3	tyrosine aminotransferase 3 [Source:EMBL;Acc:AEC07636.1]
AT2G28110	1.53698	0.620098	up	FRA8	exostosin-like protein [Source:EMBL;Acc:AEC08081.1]
AT1G48210	1.39365	0.478871	up	AT1G48210	serine/threonine protein kinase [Source:EMBL;Acc:AEE32265.1]
AT5G57010	1.0116	0.0166431	up	AT5G57010	calmodulin-binding protein-like protein [Source:EMBL;Acc:AED96833.1]
AT2G18690	-1.038	-0.053813	down	AT2G18690	uncharacterized protein [Source:EMBL;Acc:AEC06794.1]
AT4G02380	1.24286	0.313664	up	SAG21	senescence-associated protein [Source:EMBL;Acc:AEE82162.1]
AT3G22600	-1.67257	-0.742068	down	AT3G22600	bifunctional inhibitor/lipid-transfer protein/seed storage 2S albumin-like protein [Source:EMBL;Acc:AEE76657.1]
AT4G04510	-1.07069	-0.0985389	down	CRK38	cysteine-rich receptor-like protein kinase 38 [Source:EMBL;Acc:AEE82396.1]
AT1G77510	-1.06785	-0.0947062	down	PDI6	protein disulfide-isomerase 2 [Source:EMBL;Acc:AEE35987.1]
AT1G67970	1.47294	0.558703	up	AT-HSFA8	heat stress transcription factor A-8 [Source:EMBL;Acc:AEE34730.1]
AT2G18000	1.31355	0.393472	up	TAF14	TBP-associated factor 14 [Source:EMBL;Acc:AEC06713.1]
AT1G26410	-5.00326	-2.32287	down	AT1G26410	FAD-binding and BBE domain-containing protein [Source:EMBL;Acc:AEE30687.1]
AT3G26470	-1.12923	-0.175336	down	AT3G26470	RPW8 domain-containing powdery mildew resistance protein [Source:EMBL;Acc:AEE77164.1]
AT3G46690	-1.86239	-0.897155	down	AT3G46690	UDP-glycosyltransferase-like protein [Source:EMBL;Acc:AEE78194.1]
AT1G67520	1.52505	0.608857	up	AT1G67520	lectin protein kinase-like protein [Source:EMBL;Acc:AEE34658.1]
AT2G37830	1.11376	0.155444	up	AT2G37830	pseudogene.[Source:TAIR;Acc:AT2G37830]
AT4G25070	-1.74659	-0.804539	down	AT4G25070	uncharacterized protein [Source:EMBL;Acc:AEE84998.1]
AT2G47130	-1.82333	-0.866573	down	AT2G47130	Rossmann-fold NAD(P)-binding domain-containing protein [Source:EMBL;Acc:AEC10805.1]
AT1G15010	-1.26721	-0.341656	down	AT1G15010	uncharacterized protein [Source:EMBL;Acc:AEE29253.1]
AT1G08050	-1.17283	-0.23	down	AT1G08050	C3HC4-type RING finger-containing protein [Source:EMBL;Acc:AEE28235.1]
AT1G56120	-1.01304	-0.0186875	down	AT1G56120	Leucine-rich repeat transmembrane protein kinase [Source:EMBL;Acc:AEE33346.1]
AT3G60540	-1.3858	-0.470721	down	AT3G60540	Preprotein translocase Sec, Sec61-beta subunit protein [Source:EMBL;Acc:AEE80077.1]
AT1G58225	-1.74991	-0.807281	down	AT1G58225	uncharacterized protein [Source:EMBL;Acc:AEE33516.1]
AT1G01560	-1.21554	-0.281597	down	MPK11	mitogen-activated protein kinase 11 [Source:EMBL;Acc:AEE27305.1]
AT3G09270	-2.59046	-1.37321	down	ATGSTU8	glutathione S-transferase TAU 8 [Source:EMBL;Acc:AEE74745.1]
AT2G02810	-1.26916	-0.343878	down	ATUTR1	UDP-galactose transporter 1 [Source:EMBL;Acc:AEC05628.1]
AT3G07520	1.00122	0.00176334	up	ATGLR1.4	glutamate receptor 1.4 [Source:EMBL;Acc:AEE74553.1]
AT5G20230	1.19707	0.259502	up	SAG14	blue copper protein [Source:EMBL;Acc:AED92816.1]
AT1G17020	-1.41017	-0.495864	down	SRG1	protein SRG1 [Source:EMBL;Acc:AEE29531.1]
AT5G26920	1.00593	0.00853127	up	CBP60G	Cam-binding protein 60-like G [Source:EMBL;Acc:AED93627.1]
AT4G03450	-2.10701	-1.0752	down	AT4G03450	ankyrin repeat-containing protein [Source:EMBL;Acc:AEE82323.1]
AT3G63380	1.48768	0.573061	up	AT3G63380	Ca2+-transporting ATPase [Source:EMBL;Acc:AEE80473.1]
AT1G51800	-1.8238	-0.866947	down	AT1G51800	putative leucine-rich repeat protein kinase [Source:EMBL;Acc:AEE32717.1]
AT5G43910	-1.02415	-0.0344313	down	AT5G43910	pfkB-like carbohydrate kinase family protein [Source:EMBL;Acc:AED95027.1]
AT1G61800	-2.74985	-1.45935	down	GPT2	glucose-6-phosphate/phosphate translocator 2 [Source:EMBL;Acc:AEE33888.1]
AT2G17040	1.12393	0.168558	up	anac036	NAC domain containing protein 36 [Source:EMBL;Acc:AEC06578.1]
AT3G25020	-1.47235	-0.558122	down	RLP42	receptor like protein 42 [Source:EMBL;Acc:AEE76968.1]
AT5G26700	1.2684	0.343012	up	AT5G26700	putative germin-like protein subfamily 2 member 5 [Source:EMBL;Acc:AED93574.1]
AT1G32960	-1.94117	-0.956925	down	SBT3.3	Subtilase-like protein [Source:EMBL;Acc:AEE31544.1]
AT1G76960	-2.41427	-1.27159	down	AT1G76960	uncharacterized protein [Source:EMBL;Acc:AEE35912.1]
AT1G16510	-1.03544	-0.0502507	down	AT1G16510	SAUR-like auxin-responsive protein [Source:EMBL;Acc:AEE29463.1]
AT5G24530	-1.56236	-0.643728	down	DMR6	downy mildew resistance 6 protein / oxidoreductase [Source:EMBL;Acc:AED93322.1]
AT3G13090	1.4361	0.522156	up	ATMRP8	multidrug resistance-associated protein 8 [Source:EMBL;Acc:AEE75295.1]
AT3G14280	1.26589	0.340147	up	AT3G14280	uncharacterized protein [Source:EMBL;Acc:AEE75497.1]
AT1G45145	-1.17586	-0.233711	down	ATTRX5	thioredoxin H5 [Source:EMBL;Acc:AEE32083.1]
AT4G23210	1.28312	0.359652	up	CRK13	cysteine-rich receptor-like protein kinase 13 [Source:EMBL;Acc:AEE84723.1]
AT3G48650	1.27815	0.354059	up	AT3G48650	pseudogene.[Source:TAIR;Acc:AT3G48650]
AT2G44380	-2.00283	-1.00204	down	AT2G44380	cysteine/histidine-rich C1 domain-containing protein [Source:EMBL;Acc:AEC10414.1]
AT4G02520	-2.62993	-1.39502	down	ATPM24.1	glutathione S-transferase PM24 [Source:EMBL;Acc:AEE82183.1]
AT3G60970	2.76583	1.46771	up	ATMRP15	putative ABC transporter C-15 [Source:EMBL;Acc:AEE80133.1]
AT1G65500	1.5178	0.601981	up	AT1G65500	uncharacterized protein [Source:EMBL;Acc:AEE34390.1]
AT1G76040	-1.05925	-0.0830393	down	CPK29	calcium-dependent protein kinase 29 [Source:EMBL;Acc:AEE35788.1]
AT2G32830	-1.20658	-0.270928	down	PHT5	putative inorganic phosphate transporter 1-5 [Source:EMBL;Acc:AEC08747.1]
AT3G25510	-1.87306	-0.905395	down	AT3G25510	putative TIR-NBS-LRR class disease resistance protein [Source:EMBL;Acc:AEE77018.1]
AT1G73805	-1.29047	-0.3679	down	AT1G73805	calmodulin binding protein-like protein [Source:EMBL;Acc:AEE35510.1]
AT4G31230	3.60967	1.85187	up	AT4G31230	Protein kinase protein with adenine nucleotide alpha hydrolases-like domain [Source:EMBL;Acc:AEE85879.1]
AT2G46400	1.50051	0.585449	up	WRKY46	putative WRKY transcription factor 46 [Source:EMBL;Acc:AEC10690.1]
AT1G51620	-3.32567	-1.73364	down	AT1G51620	protein kinase domain-containing protein [Source:EMBL;Acc:AEE32691.1]
AT1G14870	1.41846	0.504328	up	PCR2	cadmium resistance protein 2 [Source:EMBL;Acc:AEE29237.1]
AT2G14560	-1.19323	-0.254868	down	LURP1	LURP1 protein [Source:EMBL;Acc:AEC06311.1]
AT3G16565	-1.13506	-0.182764	down	AT3G16565	putative nucleotide binding protein [Source:EMBL;Acc:AEE75838.1]
AT5G10380	-1.30236	-0.381124	down	RING1	E3 ubiquitin-protein ligase RING1 [Source:EMBL;Acc:AED91534.1]
AT4G09770	-4.8665	-2.28288	down	AT4G09770	TRAF-like family protein [Source:EMBL;Acc:AEE82795.1]
AT2G32210	1.23768	0.307642	up	AT2G32210	uncharacterized protein [Source:EMBL;Acc:AEC08650.1]
AT5G64510	-1.06458	-0.0902888	down	TIN1	uncharacterized protein [Source:EMBL;Acc:AED97909.1]
AT2G04430	-1.37777	-0.462335	down	atnudt5	nudix hydrolase 5 [Source:EMBL;Acc:AEC05835.1]
AT1G66090	2.39274	1.25867	up	AT1G66090	TIR-NBS class of disease resistance protein [Source:EMBL;Acc:AEE34461.1]
AT1G21310	-2.27064	-1.1831	down	RSH	extensin 3 [Source:EMBL;Acc:AEE30083.1]
AT1G35710	-1.05131	-0.0721944	down	AT1G35710	putative leucine-rich repeat receptor-like protein [Source:EMBL;Acc:AEE31824.1]
AT5G52810	-1.26204	-0.33576	down	AT5G52810	Rossmann-fold NAD(P)-binding domain-containing protein [Source:EMBL;Acc:AED96264.1]
AT1G13340	1.1218	0.165821	up	AT1G13340	Regulator of Vps4 activity in the MVB pathway protein [Source:EMBL;Acc:AEE29002.1]
AT2G30770	1.23679	0.306599	up	CYP71A13	cytochrome P450, family 71, subfamily A, polypeptide 13 [Source:EMBL;Acc:AEC08439.1]
AT1G79450	-1.82538	-0.868198	down	ALIS5	ALA-interacting subunit 5 [Source:EMBL;Acc:AEE36245.1]
AT5G62770	1.25368	0.326173	up	AT5G62770	uncharacterized protein [Source:EMBL;Acc:AED97655.1]
AT5G67340	1.22936	0.297909	up	AT5G67340	U-box domain-containing protein 2 [Source:EMBL;Acc:AED98330.1]
AT3G13380	-1.02606	-0.0371119	down	BRL3	receptor-like protein kinase BRI1-like 3 [Source:EMBL;Acc:AEE75340.1]
AT1G30040	1.26844	0.343057	up	GA2OX2	gibberellin 2-beta-dioxygenase 2 [Source:EMBL;Acc:AEE31171.1]
AT1G30370	3.58645	1.84256	up	AT1G30370	lipase-3 domain-containing protein [Source:EMBL;Acc:AEE31210.1]
AT1G78190	1.63656	0.710669	up	AT1G78190	Trm1.2-like protein [Source:EMBL;Acc:AEE36079.1]
AT1G73260	-6.91869	-2.7905	down	ATKTI1	kunitz trypsin inhibitor 1 [Source:EMBL;Acc:AEE35435.1]
AT5G64870	1.90054	0.926412	up	AT5G64870	Flotillin-like protein 3 [Source:EMBL;Acc:AED97963.1]
AT1G26380	-1.86507	-0.899228	down	AT1G26380	FAD-binding and BBE domain-containing protein [Source:EMBL;Acc:AEE30684.1]
AT1G24145	-1.12992	-0.176225	down	AT1G24145	uncharacterized protein [Source:EMBL;Acc:AEE30483.1]
AT5G45000	-1.05409	-0.0759966	down	AT5G45000	TIR-NBS-LRR class disease resistance protein [Source:EMBL;Acc:AED95187.1]
AT1G12290	1.19954	0.26248	up	AT1G12290	CC-NBS-LRR class disease resistance protein [Source:EMBL;Acc:AEE28863.1]
AT3G28890	-4.29856	-2.10386	down	RLP43	receptor like protein 43 [Source:EMBL;Acc:AEE77502.1]
AT1G54575	1.01556	0.0222777	up	AT1G54575	uncharacterized protein [Source:EMBL;Acc:AEE33120.1]
AT5G40230	1.70653	0.771063	up	AT5G40230	nodulin MtN21 /EamA-like transporter family protein [Source:EMBL;Acc:AED94522.1]
AT4G04490	-1.19012	-0.251104	down	CRK36	cysteine-rich receptor-like protein kinase 36 [Source:EMBL;Acc:AEE82394.1]
AT1G62840	1.18797	0.248496	up	AT1G62840	uncharacterized protein [Source:EMBL;Acc:AEE34011.1]
AT2G37770	3.19216	1.67453	up	AT2G37770	NAD(P)-linked oxidoreductase-like protein [Source:EMBL;Acc:AEC09448.1]
AT4G24190	-1.02395	-0.0341396	down	AtHsp90.7	endoplasmin-like protein [Source:EMBL;Acc:AEE84862.1]
AT3G23120	-1.03262	-0.0463083	down	RLP38	receptor like protein 38 [Source:EMBL;Acc:AEE76720.1]
AT3G13100	-1.33603	-0.417949	down	MRP7	ABC transporter C family member 7 [Source:EMBL;Acc:AEE75296.1]
AT5G59820	3.47595	1.79741	up	RHL41	C2H2-type zinc finger protein [Source:EMBL;Acc:AED97237.1]
AT5G10695	-1.33767	-0.419718	down	AT5G10695	uncharacterized protein [Source:EMBL;Acc:AED91583.1]
AT4G25000	-1.85984	-0.895179	down	ATAMY1	alpha-amylase [Source:EMBL;Acc:AEE84990.1]
AT3G51440	-1.94802	-0.962009	down	AT3G51440	strictosidine synthase family protein [Source:EMBL;Acc:AEE78793.1]
AT1G21750	-1.39221	-0.47738	down	ATPDI5	protein disulfide-isomerase A1 [Source:EMBL;Acc:AEE30151.1]
AT1G32950	1.03754	0.0531733	up	AT1G32950	Subtilase-like protein [Source:EMBL;Acc:AEE31543.1]
AT5G18470	-1.13059	-0.177071	down	AT5G18470	curculin-like (mannose-binding) lectin family protein [Source:EMBL;Acc:AED92567.1]
AT1G76980	1.06744	0.0941501	up	AT1G76980	uncharacterized protein [Source:EMBL;Acc:AEE35915.1]
AT1G35210	2.48852	1.31529	up	AT1G35210	uncharacterized protein [Source:EMBL;Acc:AEE31768.1]
AT3G48630	-2.48654	-1.31414	down	AT3G48630	uncharacterized protein [Source:EMBL;Acc:AEE78439.1]
AT3G26210	-1.43353	-0.519569	down	CYP71B23	cytochrome P450 71B23 [Source:EMBL;Acc:AEE77134.1]
AT2G31880	-1.25083	-0.322888	down	SOBIR1	putative leucine-rich repeat transmembrane protein kinase [Source:EMBL;Acc:AEC08599.1]
AT3G06890	-1.04018	-0.0568275	down	AT3G06890	uncharacterized protein [Source:EMBL;Acc:AEE74473.1]
AT5G25910	-6.77196	-2.75957	down	AtRLP52	receptor like protein 52 [Source:EMBL;Acc:AED93500.1]
AT5G52750	1.10905	0.149322	up	AT5G52750	heavy metal transport/detoxification domain-containing protein [Source:EMBL;Acc:AED96256.1]
AT1G35140	3.03557	1.60197	up	PHI-1	Phosphate-responsive 1-like protein [Source:EMBL;Acc:AEE31758.1]
AT2G29500	1.35877	0.4423	up	AT2G29500	HSP20 family protein [Source:EMBL;Acc:AEC08261.1]
AT4G23160	-1.76209	-0.817284	down	CRK8	cysteine-rich receptor-like protein kinase 8 [Source:EMBL;Acc:AEE84717.1]
AT3G47220	-10.2989	-3.36442	down	PLC9	phosphoinositide phospholipase C9 [Source:EMBL;Acc:AEE78257.1]
AT1G19020	1.24342	0.314319	up	AT1G19020	uncharacterized protein [Source:EMBL;Acc:AEE29792.1]
AT1G13470	-7.49505	-2.90594	down	AT1G13470	uncharacterized protein [Source:EMBL;Acc:AEE29023.1]
AT1G74710	1.09075	0.125324	up	ICS1	Isochorismate synthase 1 [Source:EMBL;Acc:AEE35624.1]
AT1G75170	-1.01593	-0.0228051	down	AT1G75170	sec.4-like phosphatidylinositol transfer-like protein [Source:EMBL;Acc:AEE35681.1]
AT1G65240	-2.34889	-1.23198	down	AT1G65240	aspartic proteinase-like protein 2 [Source:EMBL;Acc:AEE34347.1]
AT5G37600	1.09048	0.124958	up	GLN1;1	glutamine synthetase cytosolic isozyme 1-1 [Source:EMBL;Acc:AED94209.1]
AT1G05570	-1.25752	-0.330579	down	ATGSL06	callose synthase 1 [Source:EMBL;Acc:AEE27855.1]
AT1G34180	-1.10527	-0.1444	down	anac016	NAC domain containing protein 16 [Source:EMBL;Acc:AEE31682.1]
AT1G08450	-1.11583	-0.158121	down	AtCRT3	calreticulin-3 [Source:EMBL;Acc:AEE28291.1]
AT5G42020	1.19994	0.262968	up	BIP	Luminal-binding protein 2 [Source:EMBL;Acc:AED94755.1]
AT4G31800	1.83475	0.875587	up	WRKY18	WRKY transcription factor 18 [Source:EMBL;Acc:AEE85961.1]
AT2G34940	1.01266	0.0181566	up	VSR5	vacuolar-sorting receptor 5 [Source:EMBL;Acc:AEC09042.1]
AT4G12720	1.06632	0.0926371	up	ATNUDX7	nudix hydrolase 7 [Source:EMBL;Acc:AEE83169.1]
AT1G26200	1.21519	0.281183	up	AT1G26200	TRAM, LAG1 and CLN8 (TLC) lipid-sensing domain containing protein [Source:EMBL;Acc:AEE30660.1]
AT1G68200	-3.04445	-1.60618	down	AT1G68200	zinc finger CCCH domain-containing protein 15 [Source:EMBL;Acc:AEE34764.1]
AT5G25820	-1.66382	-0.734504	down	AT5G25820	Exostosin family protein [Source:EMBL;Acc:AED93491.1]
AT4G29520	-1.19898	-0.261803	down	AT4G29520	uncharacterized protein [Source:EMBL;Acc:AEE85639.1]
AT1G05562	-1.19537	-0.257462	down	AT1G05562	Potential natural antisense gene, locus overlaps with AT1G05560.[Source:TAIR;Acc:AT1G05562]
AT3G28540	-1.61009	-0.687142	down	AT3G28540	AAA-type ATPase family protein [Source:EMBL;Acc:AEE77457.1]
AT2G21850	-1.27114	-0.346122	down	AT2G21850	Cysteine/Histidine-rich C1 domain family protein [Source:EMBL;Acc:AEC07229.1]
AT3G54960	-1.1063	-0.145747	down	PDIL1-3	protein PDI-like 1-3 [Source:EMBL;Acc:AEE79319.1]
AT4G20110	1.03947	0.0558456	up	VSR3;1	vacuolar-sorting receptor 7 [Source:EMBL;Acc:AEE84277.1]
AT1G61420	1.49995	0.584916	up	AT1G61420	putative S-locus protein kinase [Source:EMBL;Acc:AEE33836.1]
AT2G44290	-1.34925	-0.432162	down	AT2G44290	xylogen-like protein 10 [Source:EMBL;Acc:AEC10404.1]
AT4G25110	-1.84408	-0.8829	down	AtMC2	metacaspase 2 [Source:EMBL;Acc:AEE85012.1]
AT5G46230	1.20881	0.273587	up	AT5G46230	uncharacterized protein [Source:EMBL;Acc:AED95355.1]
AT5G01100	1.36496	0.448855	up	AT5G01100	O-fucosyltransferase family protein [Source:EMBL;Acc:AED90299.1]
AT1G02470	1.53612	0.619293	up	AT1G02470	SRPBCC ligand-binding domain-containing protein [Source:EMBL;Acc:AEE27434.1]
AT4G13820	1.07561	0.10516	up	AT4G13820	leucine-rich repeat-containing protein [Source:EMBL;Acc:AEE83329.1]
AT1G72680	-2.03516	-1.02514	down	ATCAD1	putative cinnamyl alcohol dehydrogenase 1 [Source:EMBL;Acc:AEE35360.1]
AT3G57460	-1.25514	-0.327844	down	AT3G57460	catalytic/ metal ion binding / metalloendopeptidase/ zinc ion binding protein [Source:EMBL;Acc:AEE79657.1]
AT4G29850	-1.26257	-0.336365	down	AT4G29850	uncharacterized protein [Source:EMBL;Acc:AEE85685.1]
AT3G24090	-1.08767	-0.121237	down	AT3G24090	putative glucosamine-fructose-6-phosphate aminotransferase [Source:EMBL;Acc:AEE76855.1]
AT5G28540	1.08476	0.117371	up	BIP1	Luminal-binding protein 1 [Source:EMBL;Acc:AED93812.1]
AT5G52300	2.17485	1.12092	up	RD29B	CAP160 protein [Source:EMBL;Acc:AED96198.1]
AT5G27420	1.19054	0.251616	up	CNI1	E3 ubiquitin-protein ligase ATL31 [Source:EMBL;Acc:AED93685.1]
AT5G17780	6.34406	2.66541	up	AT5G17780	hydrolase, alpha/beta fold family protein [Source:EMBL;Acc:AED92468.1]
AT5G41400	1.01275	0.0182807	up	AT5G41400	RING/U-box domain-containing protein [Source:EMBL;Acc:AED94674.1]
AT4G26270	1.01903	0.0271969	up	PFK3	6-phosphofructokinase 3 [Source:EMBL;Acc:AEE85178.1]
AT2G42360	-2.17884	-1.12356	down	AT2G42360	E3 ubiquitin-protein ligase ATL41 [Source:EMBL;Acc:AEC10111.1]
AT1G65845	1.15572	0.208794	up	AT1G65845	uncharacterized protein [Source:EMBL;Acc:AEE34431.1]
AT5G08380	-1.54068	-0.623565	down	AtAGAL1	alpha-galactosidase 1 [Source:EMBL;Acc:AED91292.1]
AT1G15790	-1.13725	-0.185545	down	AT1G15790	uncharacterized protein [Source:EMBL;Acc:AEE29366.1]
AT1G32940	-1.07155	-0.0996971	down	ATSBT3.5	Subtilase-like protein [Source:EMBL;Acc:AEE31542.1]
AT1G57560	1.24526	0.316451	up	AtMYB50	myb domain protein 50 [Source:EMBL;Acc:AEE33435.1]
AT2G23170	2.65505	1.40874	up	GH3.3	indole-3-acetic acid-amido synthetase GH3.3 [Source:EMBL;Acc:AEC07424.1]
AT5G41750	1.06632	0.0926466	up	AT5G41750	TIR-NBS-LRR class disease resistance protein [Source:EMBL;Acc:AED94721.1]
AT2G25625	1.18608	0.246199	up	AT2G25625	uncharacterized protein [Source:EMBL;Acc:AEC07726.1]
AT4G34135	1.55008	0.63234	up	UGT73B2	UDP-glucosyltransferase 73B2 [Source:EMBL;Acc:AEE86329.1]
AT5G23240	-1.48734	-0.572731	down	AT5G23240	DNAJ heat shock N-terminal domain-containing protein [Source:EMBL;Acc:AED93140.1]
AT2G17710	1.19346	0.255147	up	AT2G17710	uncharacterized protein [Source:EMBL;Acc:AEC06672.1]
AT5G61790	1.11589	0.158195	up	ATCNX1	calnexin 1 [Source:EMBL;Acc:AED97518.1]
AT1G17745	-1.1164	-0.158853	down	PGDH	D-3-phosphoglycerate dehydrogenase [Source:EMBL;Acc:AEE29630.1]
AT5G67450	-1.88789	-0.916778	down	AZF1	zinc-finger protein 1 [Source:EMBL;Acc:AED98346.1]
AT4G23885	-1.11554	-0.157744	down	AT4G23885	uncharacterized protein [Source:EMBL;Acc:AEE84819.1]
AT1G76530	2.60239	1.37984	up	AT1G76530	auxin efflux carrier-like protein [Source:EMBL;Acc:AEE35856.1]
AT5G57785	2.29842	1.20064	up	AT5G57785	uncharacterized protein [Source:EMBL;Acc:AED96950.1]
AT2G15480	-1.79827	-0.846606	down	UGT73B5	UDP-glucosyl transferase 73B5 [Source:EMBL;Acc:AEC06405.1]
AT2G29090	-1.24745	-0.318986	down	CYP707A2	abscisic acid 8'-hydroxylase 2 [Source:EMBL;Acc:AEC08210.1]
AT1G66460	-1.24653	-0.317912	down	AT1G66460	protein kinase-like protein [Source:EMBL;Acc:AEE34511.1]
AT5G01550	1.25148	0.323635	up	LECRKA4.2	Lectin-domain containing receptor kinase A4.2 [Source:EMBL;Acc:AED90359.1]
AT5G47120	-1.17741	-0.235618	down	ATBI-1	BAX inhibitor 1 [Source:EMBL;Acc:AED95473.1]
AT3G03640	1.07662	0.106513	up	GLUC	putative inactive beta-glucosidase 25 [Source:EMBL;Acc:AEE73966.1]
AT1G12210	1.17834	0.23675	up	RFL1	disease resistance protein RFL1 [Source:EMBL;Acc:AEE28849.1]
AT5G20960	-1.22501	-0.292793	down	AO1	aldehyde oxidase 1 [Source:EMBL;Acc:AED92913.1]
AT2G30140	1.20095	0.264175	up	AT2G30140	UDP-glucoronosyl/UDP-glucosyl transferase-like protein [Source:EMBL;Acc:AEC08351.1]
AT3G52400	-1.24998	-0.321906	down	SYP122	syntaxin-122 [Source:EMBL;Acc:AEE78943.1]
AT1G67855	-1.10283	-0.141217	down	AT1G67855	uncharacterized protein [Source:EMBL;Acc:AEE34708.1]
AT1G61260	1.31168	0.391421	up	AT1G61260	uncharacterized protein [Source:EMBL;Acc:AEE33814.1]
AT4G23810	1.46843	0.554278	down	WRKY53	putative WRKY transcription factor 53 [Source:EMBL;Acc:AEE84809.1]
AT3G62600	-1.13344	-0.180709	down	ATERDJ3B	DNAJ heat shock family protein [Source:EMBL;Acc:AEE80368.1]
AT3G08970	-1.0055	-0.00790757	down	ATERDJ3A	DnaJ domain-containing protein [Source:EMBL;Acc:AEE74703.1]
AT5G65090	-2.18964	-1.13069	down	MRH3	inositol-1,4,5 triphosphate 5-phosphatase-like protein [Source:EMBL;Acc:AED98001.1]
AT2G28400	4.6106	2.20496	up	AT2G28400	uncharacterized protein [Source:EMBL;Acc:AEC08116.1]
AT5G61490	1.58437	0.663908	up	AT5G61490	uncharacterized protein [Source:EMBL;Acc:AED97474.1]
AT4G39030	-1.1925	-0.253984	down	EDS5	enhanced disease susceptibility 5 [Source:EMBL;Acc:AEE87009.1]
AT3G45860	-2.3078	-1.20652	down	CRK4	cysteine-rich receptor-like protein kinase 4 [Source:EMBL;Acc:AEE78083.1]
AT5G63990	-1.13419	-0.181661	down	AT5G63990	putative SAL3 phosphatase [Source:EMBL;Acc:AED97826.1]
AT2G46680	1.78282	0.834158	up	ATHB7	homeobox-leucine zipper protein ATHB-7 [Source:EMBL;Acc:AEC10739.1]
AT3G51430	1.01498	0.0214516	up	SSL5	strictosidine synthase [Source:EMBL;Acc:AEE78792.1]
AT3G08720	1.46733	0.553196	up	S6K2	serine/threonine protein kinase 2 [Source:EMBL;Acc:AEE74670.1]
AT1G34420	-1.3182	-0.398567	down	AT1G34420	leucine-rich repeat transmembrane protein kinase-like protein [Source:EMBL;Acc:AEE31712.1]
AT5G58710	-1.03427	-0.0486135	down	ROC7	Peptidyl-prolyl cis-trans isomerase CYP20-1 [Source:EMBL;Acc:AED97088.1]
AT2G38250	1.33819	0.420287	up	AT2G38250	DNA-binding protein [Source:EMBL;Acc:AEC09513.1]
AT5G09420	1.48685	0.572259	up	OM64	translocon at the outer membrane of chloroplasts 64-V [Source:EMBL;Acc:AED91391.1]
AT1G68620	-1.4953	-0.580437	down	AT1G68620	alpha/beta-hydrolase domain-containing protein [Source:EMBL;Acc:AEE34820.1]
AT4G23215	1.01515	0.0216918	up	AT4G23215	pseudogene.[Source:TAIR;Acc:AT4G23215]
AT1G79680	-3.4538	-1.78819	down	ATWAKL10	wall-associated receptor kinase-like 10 [Source:EMBL;Acc:AEE36286.1]
AT5G54140	1.85402	0.890654	up	ILL3	IAA-amino acid hydrolase ILR1-like 3 [Source:EMBL;Acc:AED96456.1]
AT5G40720	-1.03378	-0.0479317	down	AT5G40720	uncharacterized protein [Source:EMBL;Acc:AED94587.1]
AT1G33720	1.02329	0.0332193	up	CYP76C6	cytochrome P450, family 76, subfamily C, polypeptide 6 [Source:EMBL;Acc:AEE31618.1]
AT5G57560	2.90344	1.53776	up	TCH4	xyloglucan endotransglucosylase/hydrolase protein 22 [Source:EMBL;Acc:AED96915.1]
AT3G11080	1.06274	0.0877916	up	AtRLP35	receptor like protein 35 [Source:EMBL;Acc:AEE75000.1]
AT2G47470	1.09992	0.137395	up	ATPDI11	protein disulfide-isomerase A6 [Source:EMBL;Acc:AEC10844.1]
AT1G72280	1.19569	0.257847	up	AERO1	endoplasmic oxidoreductin-1 [Source:EMBL;Acc:AEE35298.1]
AT3G26500	1.01846	0.0263852	up	PIRL2	plant intracellular ras group-related LRR 2 [Source:EMBL;Acc:AEE77167.1]
AT3G22231	1.10013	0.13768	up	PCC1	pathogen and circadian controlled 1 [Source:EMBL;Acc:AEE76608.1]
AT5G56050	-3.30788	-1.72591	down	AT5G56050	uncharacterized protein [Source:EMBL;Acc:AED96715.1]
AT4G16563	-1.09558	-0.131696	down	AT4G16563	aspartyl protease family protein [Source:EMBL;Acc:AEE83770.1]
AT1G09210	1.12526	0.170255	up	CRT1b	calreticulin-2 [Source:EMBL;Acc:AEE28414.1]
AT2G29460	-1.53871	-0.621725	down	GST22	glutathione S-transferase [Source:EMBL;Acc:AEC08257.1]
AT1G72240	2.46082	1.29914	up	AT1G72240	uncharacterized protein [Source:EMBL;Acc:AEE35292.1]
AT3G01080	-1.22459	-0.292303	down	WRKY58	WRKY DNA-binding protein 58 [Source:EMBL;Acc:AEE73605.1]
AT2G38340	-5.17304	-2.37101	down	DREB19	dehydration-responsive element-binding protein 2E [Source:EMBL;Acc:AEC09525.1]
AT1G56150	1.49966	0.584632	up	AT1G56150	SAUR-like auxin-responsive protein [Source:EMBL;Acc:AEE33351.1]
AT1G74360	1.52577	0.609535	up	AT1G74360	putative LRR receptor-like serine/threonine-protein kinase [Source:EMBL;Acc:AEE35582.1]
AT3G53940	3.40498	1.76765	up	AT3G53940	Mitochondrial substrate carrier family protein [Source:EMBL;Acc:AEE79162.1]
AT5G40690	1.6832	0.751206	up	AT5G40690	uncharacterized protein [Source:EMBL;Acc:AED94582.1]
AT4G37900	-1.51471	-0.599043	down	AT4G37900	uncharacterized protein [Source:EMBL;Acc:AEE86851.1]
AT4G11350	1.41387	0.499652	up	AT4G11350	uncharacterized protein [Source:EMBL;Acc:AEE83000.1]
AT3G48080	-1.18222	-0.241493	down	AT3G48080	lipase class 3 family protein / disease resistance protein-related protein [Source:EMBL;Acc:AEE78365.1]
AT4G23450	2.88985	1.53099	up	AIRP1	RING/U-box domain-containing protein [Source:EMBL;Acc:AEE84758.1]
AT2G31865	-1.20832	-0.273007	down	PARG2	putative poly(ADP-ribose) glycohydrolase 2 [Source:EMBL;Acc:AEC08596.1]
AT2G25000	-1.05953	-0.0834306	down	WRKY60	putative WRKY transcription factor 60 [Source:EMBL;Acc:AEC07648.1]
AT2G47800	1.1677	0.223673	up	MRP4	ABC transporter C family member 4 [Source:EMBL;Acc:AEC10889.1]
AT5G23235	-1.24613	-0.317459	down	AT5G23235	pseudogene.[Source:TAIR;Acc:AT5G23235]
AT1G48605	-1.1939	-0.25568	down	ATHAL3B	putative phosphopantothenoylcysteine decarboxylase [Source:EMBL;Acc:AEE32325.1]
AT1G74590	1.35779	0.441261	up	ATGSTU10	glutathione S-transferase TAU 10 [Source:EMBL;Acc:AEE35613.1]
AT3G16980	-2.82303	-1.49724	down	NRPB9A	DNA-directed RNA polymerase II subunit I [Source:EMBL;Acc:AEE75891.1]
AT5G59670	-1.26709	-0.341515	down	AT5G59670	Receptor-like protein kinase [Source:EMBL;Acc:AED97218.1]
AT4G32870	1.15117	0.203106	up	AT4G32870	SRPBCC ligand-binding domain-containing protein [Source:EMBL;Acc:AEE86137.1]
AT3G01290	-1.11744	-0.160194	down	AT3G01290	Hypersensitive-induced response protein 3 [Source:EMBL;Acc:AEE73633.1]
AT1G76970	-1.12519	-0.170164	down	AT1G76970	Target of Myb protein 1 [Source:EMBL;Acc:AEE35914.1]
AT1G21520	-1.08051	-0.111712	down	AT1G21520	uncharacterized protein [Source:EMBL;Acc:AEE30111.1]
AT3G60450	1.12169	0.165676	up	AT3G60450	phosphoglycerate mutase-like protein [Source:EMBL;Acc:AEE80063.1]
AT1G03210	-1.1546	-0.207389	down	AT1G03210	Phenazine biosynthesis PhzC/PhzF protein [Source:EMBL;Acc:AEE27545.1]
AT1G14260	-3.41098	-1.77019	down	AT1G14260	RING/FYVE/PHD zinc finger-containing protein [Source:EMBL;Acc:AEE29133.1]
AT4G37530	-1.19473	-0.256683	down	AT4G37530	peroxidase 51 [Source:EMBL;Acc:AEE86807.1]
AT2G26440	-1.86676	-0.900537	down	AT2G26440	pectinesterase 12 [Source:EMBL;Acc:AEC07839.1]
AT1G77810	1.08456	0.11711	up	AT1G77810	beta-1,3-galactosyltransferase 7 [Source:EMBL;Acc:AEE36029.1]
AT5G27060	-1.10032	-0.137923	down	AtRLP53	receptor like protein 53 [Source:EMBL;Acc:AED93645.1]
AT1G02220	1.66849	0.738545	up	ANAC003	NAC domain-containing protein 3 [Source:EMBL;Acc:AEE27404.1]
AT4G29110	1.12215	0.166265	up	AT4G29110	uncharacterized protein [Source:EMBL;Acc:AEE85588.1]
AT2G25510	-1.45448	-0.540504	down	AT2G25510	uncharacterized protein [Source:EMBL;Acc:AEC07710.1]
AT3G04060	1.11148	0.152478	up	anac046	NAC domain containing protein 46 [Source:EMBL;Acc:AEE74032.1]
AT4G36470	1.44031	0.526383	up	AT4G36470	S-adenosyl-L-methionine-dependent methyltransferase-like protein [Source:EMBL;Acc:AEE86659.1]
AT3G07580	1.06153	0.0861414	up	AT3G07580	uncharacterized protein [Source:EMBL;Acc:AEE74568.1]
AT3G04640	2.05378	1.03828	up	AT3G04640	glycine-rich protein [Source:EMBL;Acc:AEE74112.1]
AT1G56660	1.53945	0.622412	up	AT1G56660	uncharacterized protein [Source:EMBL;Acc:AEE33420.1]
AT5G37540	-1.22905	-0.29754	down	AT5G37540	aspartyl protease family protein [Source:EMBL;Acc:AED94204.1]
AT1G24530	-1.14488	-0.195192	down	AT1G24530	transducin/WD-40 repeat-containing protein [Source:EMBL;Acc:AEE30544.1]
AT3G45620	-1.15168	-0.203745	down	AT3G45620	transducin/WD40 domain-containing protein [Source:EMBL;Acc:AEE78051.1]
AT4G14690	1.1068	0.146395	up	ELIP2	early light-inducible protein 2 [Source:EMBL;Acc:AEE83475.1]
AT1G07000	1.16679	0.222545	up	ATEXO70B2	exocyst complex component 7 [Source:EMBL;Acc:AEE28064.1]
AT5G49680	-1.4152	-0.501006	down	AT5G49680	putative cell expansion protein [Source:EMBL;Acc:AED95844.1]
AT3G29034	-1.25794	-0.331066	down	AT3G29034	uncharacterized protein [Source:EMBL;Acc:AEE77526.1]
AT1G52770	1.29593	0.373993	up	AT1G52770	phototropic-responsive NPH3-like protein [Source:EMBL;Acc:AEE32850.1]
AT5G50200	-1.12962	-0.175841	down	WR3	nitrate transmembrane transporter [Source:EMBL;Acc:AED95911.1]
AT5G01542	1.49786	0.582902	up	AT5G01542	Potential natural antisense gene, locus overlaps with AT5G01540.[Source:TAIR;Acc:AT5G01542]
AT4G36990	-1.03294	-0.0467539	down	HSF4	heat stress transcription factor B-1 [Source:EMBL;Acc:AEE86732.1]
AT4G36988	-1.03294	-0.0467539	down	CPuORF49	uncharacerized protein [Source:EMBL;Acc:AEE86731.1]
AT3G49210	-1.20967	-0.274617	down	AT3G49210	O-acyltransferase (WSD1-like) family protein [Source:EMBL;Acc:AEE78511.1]
AT1G56340	1.12242	0.166607	up	AtCRT1a	calreticulin-1 [Source:EMBL;Acc:AEE33379.1]
AT2G46150	-2.61382	-1.38616	down	AT2G46150	late embryogenesis abundant hydroxyproline-rich glycoprotein [Source:EMBL;Acc:AEC10649.1]
AT5G19875	1.01352	0.0193701	up	AT5G19875	uncharacterized protein [Source:EMBL;Acc:AED92760.1]
AT3G04220	-1.19716	-0.259614	down	AT3G04220	TIR-NBS-LRR class disease resistance protein [Source:EMBL;Acc:AEE74054.1]
AT2G45210	1.67226	0.741798	up	AT2G45210	SAUR-like auxin-responsive protein [Source:EMBL;Acc:AEC10526.1]
AT1G21250	-1.05704	-0.0800276	down	WAK1	wall-associated receptor kinase 1 [Source:EMBL;Acc:AEE30079.1]
AT3G22235	-1.09793	-0.134781	down	AT3G22235	uncharacterized protein [Source:EMBL;Acc:AEE76610.1]
AT5G01540	1.46572	0.551611	up	LECRKA4.1	Lectin-domain containing receptor kinase A4.1 [Source:EMBL;Acc:AED90358.1]
AT4G05020	1.33406	0.415822	up	NDB2	NAD(P)H dehydrogenase B2 [Source:EMBL;Acc:AEE82460.1]
AT3G61280	-1.49743	-0.582489	down	AT3G61280	uncharacterized protein [Source:EMBL;Acc:AEE80183.1]
AT1G24150	1.02574	0.0366637	up	FH4	formin homologue 4 [Source:EMBL;Acc:AEE30487.1]
AT1G60730	1.35435	0.4376	up	AT1G60730	NAD(P)-linked oxidoreductase-like protein [Source:EMBL;Acc:AEE33725.1]
AT5G60950	-2.28135	-1.18989	down	COBL5	COBRA-like protein 5 [Source:EMBL;Acc:AED97402.1]
AT1G14360	-1.06346	-0.088762	down	ATUTR3	UDP-galactose transporter 3 [Source:EMBL;Acc:AEE29152.1]
AT1G66880	-1.17614	-0.234055	down	AT1G66880	protein kinase domain-containing protein [Source:EMBL;Acc:AEE34567.1]
AT4G15530	1.48782	0.573204	up	PPDK	pyruvate, phosphate dikinase 1 [Source:EMBL;Acc:AEE83618.1]
AT3G60961	-4.11254	-2.04003	down	AT3G60961	uridylate kinase-like protein [Source:EMBL;Acc:AEE80131.1]
AT5G60800	1.18421	0.243923	up	AT5G60800	heavy metal transport/detoxification domain-containing protein [Source:EMBL;Acc:AED97378.1]
AT4G36120	-1.42507	-0.51103	down	AT4G36120	filament-like plant protein 5 [Source:EMBL;Acc:AEE86622.1]
AT3G13080	-1.08778	-0.121386	down	ATMRP3	ABC transporter C family member 3 [Source:EMBL;Acc:AEE75294.1]
AT1G67360	1.19939	0.262301	up	AT1G67360	Rubber elongation factor protein (REF) [Source:EMBL;Acc:AEE34637.1]
AT5G52540	-1.22698	-0.295112	down	AT5G52540	uncharacterized protein [Source:EMBL;Acc:AED96228.1]
AT1G17460	-1.17103	-0.227784	down	TRFL3	protein TRF-like 3 [Source:EMBL;Acc:AEE29593.1]
AT1G02850	-1.45745	-0.54345	down	BGLU11	beta glucosidase 11 [Source:EMBL;Acc:AEE27480.1]
AT5G48380	-1.15971	-0.213769	down	BIR1	probably inactive leucine-rich repeat receptor-like protein kinase [Source:EMBL;Acc:AED95662.1]
AT2G25110	-1.04814	-0.0678279	down	SDF2	stromal cell-derived factor 2-like protein [Source:EMBL;Acc:AEC07659.1]
AT5G25930	1.03594	0.0509375	up	AT5G25930	Protein kinase family protein with leucine-rich repeat domain [Source:EMBL;Acc:AED93502.1]
AT5G15870	1.14197	0.191521	up	AT5G15870	glycosyl hydrolase family 81 protein [Source:EMBL;Acc:AED92219.1]
AT3G56400	1.2768	0.352534	down	WRKY70	putative WRKY transcription factor 70 [Source:EMBL;Acc:AEE79517.1]
AT2G35070	-1.1805	-0.239396	down	AT2G35070	uncharacterized protein [Source:EMBL;Acc:AEC09059.1]
AT2G33580	1.16087	0.21521	up	AT2G33580	protein kinase family protein [Source:EMBL;Acc:AEC08855.1]
AT1G68710	1.2837	0.360305	up	AT1G68710	phospholipid-translocating ATPase [Source:EMBL;Acc:AEE34830.1]
AT1G12420	1.46764	0.553494	up	ACR8	ACT domain repeat 8 protein [Source:EMBL;Acc:AEE28878.1]
AT1G10550	2.35538	1.23596	up	XTH33	xyloglucan:xyloglucosyl transferase [Source:EMBL;Acc:AEE28593.1]
AT5G41160	-3.62801	-1.85918	down	ATPUP12	putative purine permease 12 [Source:EMBL;Acc:AED94649.1]
AT3G29575	1.59585	0.674324	up	AFP3	Ninja-family protein AFP3 [Source:EMBL;Acc:AEE77590.1]
AT5G42050	1.2464	0.317771	up	AT5G42050	DCD (Development and Cell Death) domain protein [Source:EMBL;Acc:AED94759.1]
AT5G23660	1.46452	0.550427	up	MTN3	MTN3-like protein [Source:EMBL;Acc:AED93195.1]
AT2G02390	-1.15593	-0.209051	down	GSTZ1	glutathione S-transferase zeta-class 1 [Source:EMBL;Acc:AEC05574.1]
AT3G11580	1.63095	0.705712	up	AT3G11580	AP2/B3 domain-containing protein [Source:EMBL;Acc:AEE75069.1]
AT2G21350	-1.53591	-0.619098	down	AT2G21350	RNA-binding CRS1 / YhbY (CRM) domain protein [Source:EMBL;Acc:AEC07165.1]
AT1G58300	-1.20934	-0.274224	down	HO4	heme oxygenase 4 [Source:EMBL;Acc:AEE33533.1]
AT3G07195	-1.07098	-0.0989311	down	AT3G07195	RPM1-interacting protein 4 (RIN4) family protein [Source:EMBL;Acc:AEE74512.1]
AT4G23200	-2.3409	-1.22706	down	CRK12	putative cysteine-rich receptor-like protein kinase 12 [Source:EMBL;Acc:AEE84721.1]
AT5G45470	-1.28852	-0.365714	down	AT5G45470	uncharacterized protein [Source:EMBL;Acc:AED95256.1]
AT5G16170	-1.44304	-0.529107	down	AT5G16170	Core-2/I-branching beta-1,6-N-acetylglucosaminyltransferase family protein [Source:EMBL;Acc:AED92257.1]
AT3G46230	-2.8202	-1.4958	down	ATHSP17.4	heat shock protein 17.4 [Source:EMBL;Acc:AEE78138.1]
AT1G01010	1.336	0.417918	up	ANAC001	NAC domain-containing protein 1 [Source:EMBL;Acc:AEE27216.1]
AT2G01540	1.03625	0.0513713	up	AT2G01540	calcium-dependent lipid-binding domain-containing protein [Source:EMBL;Acc:AEC05466.1]
AT3G17790	1.63412	0.70851	up	PAP17	purple acid phosphatase 17 [Source:EMBL;Acc:AEE76007.1]
AT3G18610	5.38445	2.4288	up	PARLL1	nucleolin [Source:EMBL;Acc:AEE76122.1]
AT5G45380	-1.49486	-0.580012	down	ATDUR3	solute:sodium symporter [Source:EMBL;Acc:AED95242.1]
AT1G14370	-1.23283	-0.30197	down	APK2A	protein kinase 2A [Source:EMBL;Acc:AEE29153.1]
AT1G69840	1.18014	0.238954	up	AT1G69840	Hypersensitive-induced response protein 2 [Source:EMBL;Acc:AEE34990.1]
AT5G20880	1.43447	0.520514	up	AT5G20880	transposable element gene.[Source:TAIR;Acc:AT5G20880]
AT5G58940	-1.05557	-0.0780163	down	CRCK1	calmodulin-binding receptor-like cytoplasmic kinase 1 [Source:EMBL;Acc:AED97119.1]
AT4G26120	-1.83712	-0.877446	down	AT4G26120	ankyrin repeat and BTB/POZ domain-containing protein [Source:EMBL;Acc:AEE85160.1]
AT1G65790	-1.67614	-0.745147	down	ARK1	receptor kinase 1 [Source:EMBL;Acc:AEE34423.1]
AT1G27330	-1.04041	-0.0571486	down	AT1G27330	Ribosome associated membrane protein RAMP4 [Source:EMBL;Acc:AEE30807.1]
AT3G03470	1.27552	0.351087	up	CYP89A9	cytochrome P450, family 87, subfamily A, polypeptide 9 [Source:EMBL;Acc:AEE73948.1]
AT4G12290	1.08612	0.119177	up	AT4G12290	copper amine oxidase family protein [Source:EMBL;Acc:AEE83111.1]
AT4G36710	-1.10481	-0.143795	down	AT4G36710	scarecrow-like protein 15 [Source:EMBL;Acc:AEE86692.1]
AT2G46600	-1.13397	-0.181376	down	AT2G46600	calcium-binding EF-hand-containing protein [Source:EMBL;Acc:AEC10727.1]
AT5G03160	1.03829	0.0542072	up	ATP58IPK	mamallian P58IPK-like protein [Source:EMBL;Acc:AED90562.1]
AT3G12830	-1.11816	-0.16113	down	AT3G12830	SAUR-like auxin-responsive protein [Source:EMBL;Acc:AEE75250.1]
AT4G34390	1.15733	0.210804	up	XLG2	extra-large GTP-binding protein 2 [Source:EMBL;Acc:AEE86367.1]
AT2G41100	-1.16137	-0.21583	down	ATCAL4	calmodulin-like protein 12 [Source:EMBL;Acc:AEC09929.1]
AT1G13970	1.28076	0.357	up	AT1G13970	uncharacterized protein [Source:EMBL;Acc:AEE29091.1]
AT1G79110	1.69544	0.761658	up	AT1G79110	zinc ion binding protein [Source:EMBL;Acc:AEE36206.1]
AT5G61250	1.04286	0.0605448	up	AtGUS1	Heparanase-like protein 2 [Source:EMBL;Acc:AED97443.1]
AT5G40780	-1.31592	-0.39607	down	LHT1	Lysine histidine transporter 1 [Source:EMBL;Acc:AED94594.1]
AT1G24580	4.57425	2.19354	up	AT1G24580	RING/U-box domain-containing protein [Source:EMBL;Acc:AEE30548.1]
AT5G54610	-1.38569	-0.470608	down	ANK	ankyrin repeat family protein [Source:EMBL;Acc:AED96518.1]
AT4G17695	1.01789	0.0255875	up	KAN3	protein kanadi 3 [Source:EMBL;Acc:AEE83935.1]
AT1G63440	1.85582	0.892056	up	HMA5	Cu2+-exporting ATPase [Source:EMBL;Acc:AEE34100.1]
AT1G21550	-1.07591	-0.10556	down	AT1G21550	putative calcium-binding protein CML44 [Source:EMBL;Acc:AEE30116.1]
AT3G02040	3.72516	1.8973	up	SRG3	senescence-related protein [Source:EMBL;Acc:AEE73752.1]
AT2G45510	-1.57526	-0.655586	down	CYP704A2	cytochrome P450, family 704, subfamily A, polypeptide 2 [Source:EMBL;Acc:AEC10564.1]
AT5G59662	-1.13435	-0.181865	down	AT5G59662	(AT5G59662) otherRNA [Source:RefSeq DNA;Acc:NR_023273]
AT2G29070	1.77178	0.825203	up	AT2G29070	ubiquitin fusion degradation UFD1-like protein [Source:EMBL;Acc:AEC08207.1]
AT5G50460	-1.13082	-0.177373	down	AT5G50460	protein transport protein sec61 subunit gamma-1 [Source:EMBL;Acc:AED95948.1]
AT1G18910	1.39513	0.4804	up	AT1G18910	zinc ion binding protein [Source:EMBL;Acc:AEE29781.1]
AT5G08760	-1.07728	-0.107394	down	AT5G08760	uncharacterized protein [Source:EMBL;Acc:AED91347.1]
AT2G31060	1.09332	0.128719	up	AT2G31060	elongation factor-like protein [Source:EMBL;Acc:AEC08484.1]
AT1G29640	2.09713	1.06841	up	AT1G29640	uncharacterized protein [Source:EMBL;Acc:AEE31114.1]
AT1G64065	1.60899	0.686155	up	AT1G64065	late embryogenesis abundant hydroxyproline-rich glycoprotein [Source:EMBL;Acc:AEE34187.1]
AT2G44980	1.23501	0.304518	up	AT2G44980	SNF2 and helicase domain-containing protein [Source:EMBL;Acc:AEC10492.1]
AT1G67850	-1.18124	-0.240299	down	AT1G67850	uncharacterized protein [Source:EMBL;Acc:AEE34707.1]
AT1G24140	-1.02643	-0.0376415	down	AT1G24140	matrix metalloprotease domain-containing protein [Source:EMBL;Acc:AEE30482.1]
AT1G55210	-1.14113	-0.190464	down	AT1G55210	Disease resistance-responsive (dirigent-like protein) family protein [Source:EMBL;Acc:AEE33206.1]
AT4G26060	1.06186	0.0865984	up	AT4G26060	ribosomal protein L18ae family protein [Source:EMBL;Acc:AEE85151.1]
AT2G39650	1.46997	0.555783	up	AT2G39650	uncharacterized protein [Source:EMBL;Acc:AEC09702.1]
AT3G27210	-1.03734	-0.0528855	down	AT3G27210	uncharacterized protein [Source:EMBL;Acc:AEE77279.1]
AT1G61490	2.17508	1.12107	up	AT1G61490	putative S-locus protein kinase [Source:EMBL;Acc:AEE33844.1]
AT3G22240	-1.17649	-0.234484	down	AT3G22240	uncharacterized protein [Source:EMBL;Acc:AEE76611.1]
AT2G17120	-1.10581	-0.14511	down	LYM2	LysM domain-containing GPI-anchored protein 2 [Source:EMBL;Acc:AEC06587.1]
AT5G58570	1.00668	0.00960034	up	AT5G58570	uncharacterized protein [Source:EMBL;Acc:AED97070.1]
AT1G65040	-1.19793	-0.26054	down	AT1G65040	ubiquitin-protein ligase synoviolin [Source:EMBL;Acc:AEE34320.1]
AT1G02430	1.06247	0.0874182	up	ATARFD1B	ADP-ribosylation factor D1B [Source:EMBL;Acc:AEE27429.1]
AT2G40140	1.7537	0.810403	up	SZF2	zinc finger CCCH domain-containing protein 29 [Source:EMBL;Acc:AEC09788.1]
AT1G73860	1.93114	0.949453	up	AT1G73860	putative Kinesin motor protein-related protein [Source:EMBL;Acc:AEE35517.1]
AT5G53120	-1.03826	-0.0541652	down	SPMS	Spermine synthase [Source:EMBL;Acc:AED96309.1]
AT1G07620	-1.06658	-0.0929964	down	ATOBGM	GTP-binding protein Obg/CgtA [Source:EMBL;Acc:AEE28150.1]
AT1G13990	-1.23361	-0.302891	down	AT1G13990	uncharacterized protein [Source:EMBL;Acc:AEE29094.1]
AT3G23510	-1.10151	-0.139477	down	AT3G23510	Cyclopropane-fatty-acyl-phospholipid synthase [Source:EMBL;Acc:AEE76772.1]
AT2G41410	1.27926	0.355314	up	AT2G41410	putative calcium-binding protein CML35 [Source:EMBL;Acc:AEC09970.1]
AT4G01700	-1.26522	-0.339387	down	AT4G01700	class II chitinase-like protein [Source:EMBL;Acc:AEE82066.1]
AT3G48090	-1.10945	-0.149847	down	EDS1	enhanced disease susceptibility 1 protein [Source:EMBL;Acc:AEE78367.1]
AT4G16690	1.36402	0.44787	up	ATMES16	pheophorbidase [Source:EMBL;Acc:AEE83784.1]
AT2G36780	-1.92155	-0.942274	down	AT2G36780	UDP-glucosyl transferase 73C [Source:EMBL;Acc:AEC09297.1]
AT4G33040	1.14194	0.191484	up	AT4G33040	glutaredoxin-C6 [Source:EMBL;Acc:AEE86163.1]
AT5G25230	1.70102	0.766398	up	AT5G25230	elongation factor EF-2 [Source:EMBL;Acc:AED93415.1]
AT5G67470	1.2713	0.346301	up	ATFH6	formin-like protein 6 [Source:EMBL;Acc:AED98348.1]
AT4G09750	1.48939	0.574717	up	AT4G09750	Rossmann-fold NAD(P)-binding domain-containing protein [Source:EMBL;Acc:AEE82790.1]
AT4G28400	-1.14403	-0.194122	down	AT4G28400	putative protein phosphatase 2C 58 [Source:EMBL;Acc:AEE85481.1]
AT5G58620	1.16819	0.224271	up	AT5G58620	zinc finger CCCH domain-containing protein 66 [Source:EMBL;Acc:AED97077.1]
AT3G05500	-1.18819	-0.248767	down	AT3G05500	Rubber elongation factor protein [Source:EMBL;Acc:AEE74249.1]
AT4G01010	-1.04654	-0.0656265	down	CNGC13	cyclic nucleotide-gated channel 13 [Source:EMBL;Acc:AEE81966.1]
AT1G20350	-1.5415	-0.624333	down	ATTIM17-1	translocase inner membrane subunit 17-1 [Source:EMBL;Acc:AEE29964.1]
AT2G40750	1.01419	0.0203283	up	ATWRKY54	WRKY DNA-binding protein 54 [Source:EMBL;Acc:AEC09872.1]
AT4G16660	1.04028	0.0569766	up	AT4G16660	hypoxia up-regulated 1 [Source:EMBL;Acc:AEE83781.1]
AT2G29720	1.30305	0.381891	up	CTF2B	CTF2B like oxidoreductase [Source:EMBL;Acc:AEC08297.1]
AT3G50920	1.28022	0.356388	up	AT3G50920	Phosphatidic acid phosphatase (PAP2) family protein [Source:EMBL;Acc:AEE78726.1]
AT4G33540	-1.05298	-0.0744787	down	AT4G33540	metallo-beta-lactamase family protein [Source:EMBL;Acc:AEE86243.1]
AT3G63030	-1.34061	-0.422895	down	MBD4	methyl-CPG-binding domain 4 protein [Source:EMBL;Acc:AEE80426.1]
AT5G06570	-13.3382	-3.73749	down	AT5G06570	alpha/beta hydrolase fold-containing protein [Source:EMBL;Acc:AED91036.1]
AT1G18570	-1.11803	-0.160963	down	BW51A	myb domain protein 51 [Source:EMBL;Acc:AEE29730.1]
AT5G40240	-1.49423	-0.579406	down	AT5G40240	nodulin MtN21 /EamA-like transporter family protein [Source:EMBL;Acc:AED94523.1]
AT2G38860	-1.47979	-0.565396	down	YLS5	class I glutamine amidotransferase-like domain-containing protein [Source:EMBL;Acc:AEC09595.1]
AT4G01910	1.96997	0.978175	up	AT4G01910	cysteine/histidine-rich C1 domain-containing protein [Source:EMBL;Acc:AEE82095.1]
AT3G47950	1.27124	0.346236	up	AHA4	H(+)-ATPase 4 [Source:EMBL;Acc:AEE78350.1]
AT2G47190	1.22238	0.289697	up	ATMYB2	myb domain protein 2 [Source:EMBL;Acc:AEC10812.1]
AT1G13330	1.7236	0.785424	up	AHP2	homologous-pairing protein 2 [Source:EMBL;Acc:AEE29001.1]
AT1G74350	1.9445	0.9594	up	AT1G74350	intron maturase, type II-like protein [Source:EMBL;Acc:AEE35581.1]
AT5G60440	1.25137	0.323507	up	AGL62	agamous-like MADS-box protein AGL62 [Source:EMBL;Acc:AED97331.1]
AT5G07830	1.01898	0.0271203	up	AtGUS2	Heparanase-like protein 1 [Source:EMBL;Acc:AED91209.1]
AT5G66620	1.7946	0.843665	up	DAR6	protein DA1-related 6 [Source:EMBL;Acc:AED98240.1]
AT3G25610	-1.28934	-0.366636	down	AT3G25610	phospholipid-transporting ATPase 10 [Source:EMBL;Acc:AEE77042.1]
AT5G06320	1.48877	0.574119	up	NHL3	NDR1/HIN1-Like protein 3 [Source:EMBL;Acc:AED91002.1]
AT1G27350	-1.02634	-0.0375131	down	AT1G27350	Ribosome associated membrane protein RAMP4 [Source:EMBL;Acc:AEE30809.1]
AT4G13900	-1.05007	-0.0704823	down	AtRLP49
AT3G22400	-1.00417	-0.00600259	down	LOX5	lipoxygenase 5 [Source:EMBL;Acc:AEE76630.1]
AT2G15390	-2.32946	-1.21999	down	FUT4	xyloglucan fucosyltransferase [Source:EMBL;Acc:AEC06395.1]
AT5G05460	-1.32228	-0.403022	down	AT5G05460	mannosyl-glycoprotein endo-beta-N-acetylglucosaminidase [Source:EMBL;Acc:AED90876.1]
AT3G45290	-1.46732	-0.553188	down	MLO3	MLO-like protein 3 [Source:EMBL;Acc:AEE78019.1]
AT2G31020	-1.49381	-0.579001	down	ORP1A	oxysterol binding protein-related protein 1A [Source:EMBL;Acc:AEC08479.1]
AT4G21903	-2.06094	-1.0433	down	AT4G21903	mate efflux domain-containing protein [Source:EMBL;Acc:AEE84523.1]
AT1G03290	1.00895	0.0128482	up	AT1G03290	uncharacterized protein [Source:EMBL;Acc:AEE27555.1]
AT3G50260	1.0683	0.0953113	up	CEJ1	ethylene-responsive transcription factor ERF011 [Source:EMBL;Acc:AEE78646.1]
AT1G29240	-1.23951	-0.309768	down	AT1G29240	uncharacterized protein [Source:EMBL;Acc:AEE31064.1]
AT2G37870	-2.29325	-1.19739	down	AT2G37870	protease inhibitor/seed storage/lipid transfer protein (LTP) family protein [Source:EMBL;Acc:AEC09460.1]
AT1G15310	2.38992	1.25696	up	ATHSRP54A	Signal recognition particle protein 1 [Source:EMBL;Acc:AEE29301.1]
AT5G48560	-1.06533	-0.0913057	down	AT5G48560	transcription factor bHLH78 [Source:EMBL;Acc:AED95688.1]
AT5G54860	-1.35812	-0.441607	down	AT5G54860	major facilitator protein [Source:EMBL;Acc:AED96550.1]
AT4G04695	1.17533	0.233068	up	CPK31	calcium-dependent protein kinase 31 [Source:EMBL;Acc:AEE82413.1]
AT1G33560	1.05118	0.0720154	up	ADR1	disease resistance protein ADR1 [Source:EMBL;Acc:AEE31605.1]
AT5G60280	-1.24192	-0.312569	down	AT5G60280	concanavalin A-like lectin kinase-like protein [Source:EMBL;Acc:AED97302.1]
AT3G10500	1.11924	0.162525	up	anac053	NAC domain containing protein 53 [Source:EMBL;Acc:AEE74917.1]
AT5G07340	-1.12866	-0.174615	down	AT5G07340	calnexin2 [Source:EMBL;Acc:AED91138.1]
AT1G14010	-1.14052	-0.189694	down	AT1G14010	emp24/gp25L/p24 family/GOLD domain-containing protein [Source:EMBL;Acc:AEE29098.1]
AT3G54085	1.73061	0.791281	up	AT3G54085	Yos1-like protein [Source:EMBL;Acc:AEE79186.1]
AT3G52430	-1.25327	-0.3257	down	PAD4	protein PHYTOALEXIN DEFICIENT 4 [Source:EMBL;Acc:AEE78945.1]
AT1G78290	1.09997	0.137462	up	AT1G78290	serine/threonine-protein kinase SRK2C [Source:EMBL;Acc:AEE36092.1]
AT4G33360	1.04601	0.0648979	up	FLDH	Rossmann-fold NAD(P)-binding domain-containing protein [Source:EMBL;Acc:AEE86214.1]
AT5G10740	1.03938	0.0557222	up	AT5G10740	putative protein phosphatase 2C 69 [Source:EMBL;Acc:AED91590.1]
AT1G27980	-1.03676	-0.052077	down	ATDPL1	Sphingosine-1-phosphate lyase [Source:EMBL;Acc:AEE30898.1]
AT1G22400	1.21746	0.283877	up	ATUGT85A1	cytokinin-O-glucosyltransferase 2 [Source:EMBL;Acc:AEE30237.1]
AT4G11850	-1.16569	-0.221181	down	MEE54	phospholipase D gamma 1 [Source:EMBL;Acc:AEE83058.1]
AT2G13790	-1.15647	-0.209724	down	SERK4	somatic embryogenesis receptor kinase 4 [Source:EMBL;Acc:AEC06259.1]
AT4G28510	1.51992	0.603992	up	ATPHB1	prohibitin 1 [Source:EMBL;Acc:AEE85496.1]
AT5G12930	-1.22727	-0.295454	down	AT5G12930	uncharacterized protein [Source:EMBL;Acc:AED91832.1]
AT1G74020	1.43783	0.523891	up	SS2	strictosidine synthase 1 [Source:EMBL;Acc:AEE35538.1]
AT3G07720	1.40382	0.489353	up	AT3G07720	galactose oxidase/kelch repeat-containing protein [Source:EMBL;Acc:AEE74592.1]
AT3G11230	1.3567	0.440099	up	AT3G11230	yippee-like protein [Source:EMBL;Acc:AEE75017.1]
AT5G42010	1.45399	0.540015	up	AT5G42010	transducin/WD40 domain-containing protein [Source:EMBL;Acc:AED94754.1]
AT5G03350	-1.18256	-0.24191	down	AT5G03350	lectin-like protein [Source:EMBL;Acc:AED90590.1]
AT5G61900	-1.13665	-0.184787	down	BON1	calcium-dependent phospholipid-binding copine-like protein [Source:EMBL;Acc:AED97535.1]
AT2G16870	1.30382	0.382744	up	AT2G16870	TIR-NBS-LRR class disease resistance protein [Source:EMBL;Acc:AEC06545.1]
AT5G46500	1.5117	0.59617	up	AT5G46500	uncharacterized protein [Source:EMBL;Acc:AED95392.1]
AT4G37370	1.15152	0.203541	up	CYP81D8	cytochrome P450, family 81, subfamily D, polypeptide 8 [Source:EMBL;Acc:AEE86785.1]
AT1G21390	-1.13184	-0.178664	down	emb2170	embryo defective 2170 [Source:EMBL;Acc:AEE30097.1]
AT5G39050	1.12776	0.173462	up	AT5G39050	HXXXD-type acyl-transferase-like protein [Source:EMBL;Acc:AED94391.1]
AT4G38260	-1.27836	-0.354294	down	AT4G38260	uncharacterized protein [Source:EMBL;Acc:AEE86906.1]
AT5G55170	-2.11296	-1.07927	down	SUM3	small ubiquitin-related modifier 3 [Source:EMBL;Acc:AED96595.1]
AT5G47070	1.21708	0.283423	up	AT5G47070	putative receptor-like protein kinase [Source:EMBL;Acc:AED95463.1]
AT3G49120	-1.23844	-0.308528	down	ATPCB	peroxidase 34 [Source:EMBL;Acc:AEE78501.1]
AT5G38210	1.16549	0.220938	up	AT5G38210	protein kinase-like protein [Source:EMBL;Acc:AED94281.1]
AT1G07135	2.11105	1.07796	up	AT1G07135	glycine-rich protein [Source:EMBL;Acc:AEE28080.1]
AT4G00240	1.50802	0.592657	up	PLDBETA2	phospholipase D beta 2 [Source:EMBL;Acc:AEE81845.1]
AT1G74010	1.41742	0.503267	up	AT1G74010	strictosidine synthase [Source:EMBL;Acc:AEE35537.1]
AT4G24920	-1.16993	-0.226423	down	AT4G24920	protein transport protein sec61 subunit gamma-1 [Source:EMBL;Acc:AEE84976.1]
AT5G44820	-1.5763	-0.656538	down	AT5G44820	Nucleotide-diphospho-sugar transferase family protein [Source:EMBL;Acc:AED95165.1]
AT5G66630	1.62524	0.700656	up	DAR5	DA1-related protein 5 [Source:EMBL;Acc:AED98241.1]
AT2G46430	-1.25984	-0.333239	down	CNGC3.C	cyclic nucleotide gated channel [Source:EMBL;Acc:AEC10695.1]
AT2G27920	-1.04578	-0.0645755	down	SCPL51	serine carboxypeptidase-like 51 [Source:EMBL;Acc:AEC08058.1]
AT5G66640	-2.13087	-1.09144	down	DAR3	protein DA1-related 3 [Source:EMBL;Acc:AED98243.1]
AT1G34380	1.20048	0.263613	up	AT1G34380	5'-3' exonuclease-like protein [Source:EMBL;Acc:AEE31706.1]
AT3G23010	1.57241	0.652973	up	AtRLP36	receptor like protein 36 [Source:EMBL;Acc:AEE76705.1]
AT4G13330	2.05639	1.04011	up	AT4G13330	S-adenosylmethionine-dependent methyltransferase domain-containing protein [Source:EMBL;Acc:AEE83264.1]
AT2G20560	1.11185	0.15296	up	AT2G20560	DNAJ heat shock protein-like protein [Source:EMBL;Acc:AEC07028.1]
AT3G63010	1.27189	0.346979	up	GID1B	putative gibberellin receptor GID1L2 [Source:EMBL;Acc:AEE80423.1]
AT1G27770	-1.07348	-0.102293	down	PEA1	autoinhibited Ca2+-ATPase 1 [Source:EMBL;Acc:AEE30878.1]
AT1G71040	-1.12852	-0.174429	down	LPR2	cupredoxin-like protein [Source:EMBL;Acc:AEE35155.1]
AT4G04570	-1.03801	-0.0538222	down	CRK40	cysteine-rich receptor-like protein kinase 40 [Source:EMBL;Acc:AEE82399.1]
AT3G17420	-1.41543	-0.501239	down	GPK1	glyoxysomal protein kinase 1 [Source:EMBL;Acc:AEE75951.1]
AT1G63840	1.09341	0.128835	up	AT1G63840	RING/U-box domain-containing protein [Source:EMBL;Acc:AEE34155.1]
AT4G14420	-1.07044	-0.0982097	down	AT4G14420	HR-like lesion-inducing protein-like protein [Source:EMBL;Acc:AEE83443.1]
AT4G21926	1.09804	0.134935	up	AT4G21926	uncharacterized protein [Source:EMBL;Acc:AEE84530.1]
AT3G05970	-1.11809	-0.161034	down	LACS6	long-chain acyl-CoA synthetase 6 [Source:EMBL;Acc:AEE74324.1]
AT1G15670	1.48316	0.568672	up	AT1G15670	putative F-box/kelch-repeat protein [Source:EMBL;Acc:AEE29347.1]
AT4G02220	1.1881	0.248657	up	AT4G02220	MYND type zinc finger and programmed cell death 2 C-terminal domain-containing protein [Source:EMBL;Acc:AEE82142.1]
AT5G37780	1.03518	0.0498804	up	ACAM-1	calmodulin 1 [Source:EMBL;Acc:AED94231.1]
AT2G26560	-6.39989	-2.67805	down	PLA IIA	phospholipase A 2A [Source:EMBL;Acc:AEC07858.1]
AT4G18580	-1.09157	-0.126399	down	AT4G18580	uncharacterized protein [Source:EMBL;Acc:AEE84063.1]
AT4G09570	1.1452	0.195606	up	CPK4	calcium-dependent protein kinase 4 [Source:EMBL;Acc:AEE82766.1]
AT3G04010	1.25225	0.324525	up	AT3G04010	O-Glycosyl hydrolases family 17 protein [Source:EMBL;Acc:AEE74025.1]
AT1G09560	-1.16609	-0.221684	down	GLP5	germin-like protein subfamily 2 member 1 [Source:EMBL;Acc:AEE28461.1]
AT1G31580	-1.43133	-0.517359	down	CXC750	protein ECS1 [Source:EMBL;Acc:AEE31373.1]
AT1G23140	1.15269	0.205007	up	AT1G23140	calcium-dependent lipid-binding domain-containing protein [Source:EMBL;Acc:AEE30344.1]
AT3G28340	2.63594	1.39832	up	GATL10	putative galacturonosyltransferase-like 10 [Source:EMBL;Acc:AEE77435.1]
AT5G60900	-1.20731	-0.271793	down	RLK1	receptor-like protein kinase 1 [Source:EMBL;Acc:AED97394.1]
AT1G65820	-1.10842	-0.148501	down	AT1G65820	glutathione S-transferase [Source:EMBL;Acc:AEE34427.1]
AT1G70690	-2.1088	-1.07643	down	HWI1	cysteine-rich repeat secretory protein 2 [Source:EMBL;Acc:AEE35100.1]
AT5G51770	1.28127	0.357575	up	AT5G51770	protein kinase family protein [Source:EMBL;Acc:AED96124.1]
AT5G53370	1.01591	0.0227741	up	ATPMEPCRF	Putative pectinesterase/pectinesterase inhibitor 61 [Source:EMBL;Acc:AED96345.1]
AT3G62780	-1.97028	-0.978399	down	AT3G62780	calcium-dependent lipid-binding domain-containing protein [Source:EMBL;Acc:AEE80391.1]
AT1G72330	-1.1583	-0.212007	down	ALAAT2	alanine aminotransferase 2 [Source:EMBL;Acc:AEE35306.1]
AT5G54710	-1.1029	-0.1413	down	AT5G54710	ankyrin repeat-containing protein [Source:EMBL;Acc:AED96529.1]
AT1G23840	-1.42184	-0.507758	down	AT1G23840	uncharacterized protein [Source:EMBL;Acc:AEE30438.1]
AT5G24210	-1.21774	-0.284207	down	AT5G24210	lipase class 3 family protein [Source:EMBL;Acc:AED93271.1]
AT1G26690	-1.0147	-0.0210485	down	AT1G26690	emp24/gp25L/p24 family/GOLD domain-containing protein [Source:EMBL;Acc:AEE30721.1]
AT1G28190	1.28088	0.35713	up	AT1G28190	uncharacterized protein [Source:EMBL;Acc:AEE30929.1]
AT5G15860	1.06636	0.0926946	up	ATPCME	prenylcysteine methylesterase [Source:EMBL;Acc:AED92218.1]
AT2G37760	1.48914	0.574477	up	AT2G37760	NAD(P)-linked oxidoreductase-like protein [Source:EMBL;Acc:AEC09446.1]
AT5G61640	1.23424	0.303619	up	PMSR1	peptide methionine sulfoxide reductase A1 [Source:EMBL;Acc:AED97500.1]
AT2G29990	-1.27173	-0.346795	down	NDA2	NADH dehydrogenase [Source:EMBL;Acc:AEC08332.1]
AT5G54720	1.04767	0.0671859	up	AT5G54720	ankyrin repeat-containing protein [Source:EMBL;Acc:AED96530.1]
AT2G29120	-1.91639	-0.938391	down	ATGLR2.7	glutamate receptor 2.7 [Source:EMBL;Acc:AEC08213.1]
AT5G19240	1.17799	0.236332	up	AT5G19240	GPI-anchored glycoprotein membrane precursor [Source:EMBL;Acc:AED92674.1]
AT5G01720	1.02393	0.0341193	up	AT5G01720	F-box/LRR-repeat protein 3 [Source:EMBL;Acc:AED90382.1]
AT5G01610	-1.24093	-0.311423	down	AT5G01610	uncharacterized protein [Source:EMBL;Acc:AED90365.1]
AT2G11810	1.97721	0.983468	up	MGDC	Monogalactosyldiacylglycerol synthase 3 [Source:EMBL;Acc:AEC06184.1]
AT5G21900	1.42453	0.510489	up	AT5G21900	RNI-like family protein-like protein [Source:EMBL;Acc:AED92952.1]
AT5G02290	-1.0437	-0.0617014	down	NAK	putative serine/threonine-protein kinase NAK [Source:EMBL;Acc:AED90456.1]
AT1G21400	-1.34965	-0.432588	down	AT1G21400	2-oxoisovalerate dehydrogenase E1 component, alpha subunit [Source:EMBL;Acc:AEE30099.1]
AT3G60440	1.45442	0.540439	up	AT3G60440	phosphoglycerate mutase-like protein [Source:EMBL;Acc:AEE80062.1]
AT3G13910	-1.17277	-0.229923	down	AT3G13910	uncharacterized protein [Source:EMBL;Acc:AEE75437.1]
AT4G14800	1.13796	0.18645	up	PBD2	proteasome subunit beta type-2-B [Source:EMBL;Acc:AEE83500.1]
AT1G77660	-2.14487	-1.10089	down	AT1G77660	putative phosphatidylinositol-4-phosphate 5-kinase [Source:EMBL;Acc:AEE36006.1]
AT1G02360	-2.4939	-1.31841	down	AT1G02360	putative chitinase [Source:EMBL;Acc:AEE27420.1]
AT3G46440	-1.26516	-0.339325	down	UXS5	UDP-XYL synthase 5 [Source:EMBL;Acc:AEE78159.1]
AT5G10440	2.10916	1.07667	up	CYCD4;2	cyclin-D4-2 [Source:EMBL;Acc:AED91540.1]
AT5G44568	-1.70745	-0.771847	down	AT5G44568	uncharacterized protein [Source:EMBL;Acc:AED95126.1]
AT3G62590	1.20392	0.267741	up	AT3G62590	lipase class 3 family protein [Source:EMBL;Acc:AEE80367.1]
AT5G45800	-1.10849	-0.14859	down	MEE62	leucine-rich repeat protein kinase-like protein [Source:EMBL;Acc:AED95301.1]
AT4G15233	1.08818	0.121922	up	AT4G15233	ABC transporter G family member 42 [Source:EMBL;Acc:AEE83572.1]
AT1G60890	-1.14311	-0.192967	down	AT1G60890	phosphatidylinositol-4-phosphate 5-kinase 8 [Source:EMBL;Acc:AEE33744.1]
AT3G52710	-1.08038	-0.111533	down	AT3G52710	uncharacterized protein [Source:EMBL;Acc:AEE78984.1]
AT5G18780	-1.49921	-0.584205	down	AT5G18780	F-box domain-containing protein [Source:EMBL;Acc:AED92611.1]
AT2G46270	1.0259	0.0368865	up	GBF3	G-box binding factor 3 [Source:EMBL;Acc:AEC10668.1]
AT2G37080	-1.05891	-0.0825742	down	RIP3	interactor of constitutive active ROPs 2 [Source:EMBL;Acc:AEC09349.1]
AT5G25440	-1.39296	-0.478154	down	AT5G25440	protein kinase family protein [Source:EMBL;Acc:AED93443.1]
AT5G13490	1.21822	0.284774	up	AAC2	ADP,ATP carrier protein 2 [Source:EMBL;Acc:AED91902.1]
AT4G04220	1.15535	0.208334	up	AtRLP46	receptor like protein 46 [Source:EMBL;Acc:AEE82375.1]
AT5G50350	1.04612	0.0650428	up	AT5G50350	uncharacterized protein [Source:EMBL;Acc:AED95931.1]
AT3G03560	-1.04889	-0.0688664	down	AT3G03560	uncharacterized protein [Source:EMBL;Acc:AEE73957.1]
AT4G27900	1.12131	0.165184	up	AT4G27900	CCT motif family protein [Source:EMBL;Acc:AEE85407.1]
AT2G24390	-1.23987	-0.310192	down	AT2G24390	AIG2-like family protein [Source:EMBL;Acc:AEC07569.1]
AT1G20693	-1.02193	-0.0312955	down	NFD02	high mobility group B2 protein [Source:EMBL;Acc:AEE30007.1]
AT4G17720	1.08476	0.117374	up	AT4G17720	RNA recognition motif-containing protein [Source:EMBL;Acc:AEE83940.1]
AT5G35735	-1.47294	-0.558699	down	AT5G35735	putative auxin-responsive protein [Source:EMBL;Acc:AED94011.1]
AT5G27830	-1.12464	-0.169464	down	AT5G27830	uncharacterized protein [Source:EMBL;Acc:AED93731.1]
AT3G09010	-1.08905	-0.123067	down	AT3G09010	protein kinase domain-containing protein [Source:EMBL;Acc:AEE74708.1]
AT3G23560	-2.16871	-1.11684	down	ALF5	mate efflux domain-containing protein [Source:EMBL;Acc:AEE76777.1]
AT5G43860	1.0468	0.0659892	up	ATCLH2	chlorophyllase 2 [Source:EMBL;Acc:AED95018.1]
AT1G18890	1.03885	0.0549825	up	ATCDPK1	calcium-dependent protein kinase 1 [Source:EMBL;Acc:AEE29777.1]
AT4G08230	-1.04719	-0.0665226	down	AT4G08230	glycine-rich protein [Source:EMBL;Acc:AEE82611.1]
AT4G23230	-2.02017	-1.01448	down	CRK15	cysteine-rich receptor-like protein kinase 15 [Source:EMBL;Acc:AEE84726.1]
AT3G46930	1.25238	0.324674	up	AT3G46930	protein kinase family protein [Source:EMBL;Acc:AEE78221.1]
AT3G50800	-1.05365	-0.0753921	down	AT3G50800	uncharacterized protein [Source:EMBL;Acc:AEE78711.1]
AT4G29810	-1.37324	-0.457588	down	MK1	mitogen-activated protein kinase kinase 2 [Source:EMBL;Acc:AEE85681.1]
AT4G39890	-1.15559	-0.20863	down	AtRABH1c	Ras-related protein RABH1C [Source:EMBL;Acc:AEE87134.1]
AT5G51570	-1.28557	-0.36241	down	AT5G51570	Hypersensitive-induced response protein 4 [Source:EMBL;Acc:AED96099.1]
AT1G63720	-2.02126	-1.01526	down	AT1G63720	uncharacterized protein [Source:EMBL;Acc:AEE34137.1]
AT3G26220	-1.52422	-0.60807	down	CYP71B3	cytochrome P450 71B3 [Source:EMBL;Acc:AEE77135.1]
AT2G05840	1.21642	0.282643	up	PAA2	proteasome subunit alpha type-6-B [Source:EMBL;Acc:AEC05980.1]
AT2G22500	1.27635	0.352028	up	UCP5	uncoupling protein 5 [Source:EMBL;Acc:AEC07315.1]
AT4G16700	1.62122	0.697076	up	PSD1	phosphatidylserine decarboxylase [Source:EMBL;Acc:AEE83788.1]
AT4G23470	-1.346	-0.428681	down	AT4G23470	PLAC8 family protein [Source:EMBL;Acc:AEE84763.1]
AT3G51890	-1.1219	-0.165942	down	AT3G51890	Clathrin light chain protein [Source:EMBL;Acc:AEE78859.1]
AT4G21980	-1.09266	-0.127844	down	ATG8A	autophagy-related protein 8a [Source:EMBL;Acc:AEE84537.1]
AT3G57540	1.65378	0.72577	up	AT3G57540	Remorin family protein [Source:EMBL;Acc:AEE79669.1]
AT5G26340	-2.21331	-1.1462	down	MSS1	sugar transport protein 13 [Source:EMBL;Acc:AED93553.1]
AT5G38650	1.14347	0.193414	up	AT5G38650	Proteasome maturation factor UMP1 [Source:EMBL;Acc:AED94347.1]
AT3G49725	1.49081	0.576092	up	AT3G49725	GTP-binding protein, HflX [Source:EMBL;Acc:AEE78582.1]
AT3G03060	1.78623	0.836915	up	AT3G03060	P-loop containing nucleoside triphosphate hydrolase-like protein [Source:EMBL;Acc:AEE73897.1]
AT5G37740	1.05603	0.0786533	up	AT5G37740	calcium-dependent lipid-binding domain-containing protein [Source:EMBL;Acc:AED94225.1]
AT1G30640	-1.20381	-0.26761	down	AT1G30640	Protein kinase family protein [Source:EMBL;Acc:AEE31255.1]
AT2G45790	-1.21281	-0.278353	down	ATPMM	phosphomannomutase [Source:EMBL;Acc:AEC10601.1]
AT2G36580	-1.04645	-0.0655066	down	AT2G36580	pyruvate kinase-like protein [Source:EMBL;Acc:AEC09271.1]
AT4G13920	1.25718	0.330188	up	RLP50	receptor like protein 50 [Source:EMBL;Acc:AEE83343.1]
AT5G22060	1.24523	0.316408	up	ATJ2	chaperone protein dnaJ 2 [Source:EMBL;Acc:AED92977.1]
AT2G21188	1.07809	0.108481	up	AT2G21188	other RNA.[Source:TAIR;Acc:AT2G21188]
AT1G69520	-1.09437	-0.130102	down	AT1G69520	S-adenosylmethionine-dependent methyltransferase domain-containing protein [Source:EMBL;Acc:AEE34937.1]
AT3G06990	-2.44612	-1.2905	down	AT3G06990	cysteine/histidine-rich C1 domain-containing protein [Source:EMBL;Acc:AEE74485.1]
AT4G26910	-1.20337	-0.267076	down	AT4G26910	dihydrolipoyllysine-residue succinyltransferase component of 2-oxoglutarate dehydrogenase complex 2 [Source:EMBL;Acc:AEE85267.1]
AT3G26840	1.11522	0.157323	up	AT3G26840	acyltransferase-like protein [Source:EMBL;Acc:AEE77221.1]
AT1G67650	2.3314	1.2212	up	AT1G67650	signal recognition particle subunit SRP72 [Source:EMBL;Acc:AEE34676.1]
AT3G56170	-1.08161	-0.113183	down	CAN	Ca-2+ dependent nuclease [Source:EMBL;Acc:AEE79489.1]
AT5G23850	-1.01942	-0.0277535	down	AT5G23850	uncharacterized protein [Source:EMBL;Acc:AED93222.1]
AT1G75750	1.36367	0.447495	up	GASA1	gibberellin-regulated protein 1 [Source:EMBL;Acc:AEE35754.1]
AT2G17130	-1.00618	-0.0088822	down	IDH-II	Isocitrate dehydrogenase [NAD] regulatory subunit 2 [Source:EMBL;Acc:AEC06588.1]
AT1G21900	-1.16792	-0.223941	down	AT1G21900	emp24/gp25L/p24 family/GOLD domain-containing protein [Source:EMBL;Acc:AEE30170.1]
AT5G39090	1.1618	0.216361	up	AT5G39090	HXXXD-type acyl-transferase-like protein [Source:EMBL;Acc:AED94393.1]
AT1G71220	-1.06115	-0.0856266	down	PSL2	UDP-glucose:glycoprotein glucosyltransferase [Source:EMBL;Acc:AEE35174.1]
AT5G61210	-1.08916	-0.123211	down	SNAP33	SNAP25 homologous protein SNAP33 [Source:EMBL;Acc:AED97436.1]
AT4G36090	-1.04516	-0.0637261	down	AT4G36090	oxidoreductase, 2OG-Fe(II) oxygenase family protein [Source:EMBL;Acc:AEE86615.1]
AT2G05380	-3.10897	-1.63644	down	GRP3S	glycine-rich protein 3 short isoform [Source:EMBL;Acc:AEC05924.1]
AT2G16600	-1.25266	-0.324996	down	ROC3	Peptidyl-prolyl cis-trans isomerase CYP19-1 [Source:EMBL;Acc:AEC06518.1]
AT3G20960	-2.11432	-1.0802	down	CYP705A33	cytochrome P450, family 705, subfamily A, polypeptide 33 [Source:EMBL;Acc:AEE76446.1]
AT1G42480	-1.02854	-0.0405957	down	AT1G42480	uncharacterized protein [Source:EMBL;Acc:AEE31921.1]
AT5G63290	2.61402	1.38627	up	AT5G63290	oxygen-independent coproporphyrinogen III oxidase [Source:EMBL;Acc:AED97728.1]
AT1G34750	-1.15026	-0.201962	down	AT1G34750	putative protein phosphatase 2C 10 [Source:EMBL;Acc:AEE31734.1]
AT2G37110	-1.15432	-0.20704	down	AT2G37110	PLAC8 domain-containing protein [Source:EMBL;Acc:AEC09352.1]
AT5G63680	1.04291	0.0606152	up	AT5G63680	pyruvate kinase [Source:EMBL;Acc:AED97785.1]
AT1G07220	1.32966	0.411054	up	AT1G07220	uncharacterized protein [Source:EMBL;Acc:AEE28094.1]
AT4G33050	-1.39904	-0.484434	down	EDA39	calmodulin-binding protein [Source:EMBL;Acc:AEE86165.1]
AT5G57480	-1.10253	-0.140816	down	AT5G57480	AAA-type ATPase family protein [Source:EMBL;Acc:AED96906.1]
AT4G23220	-1.99731	-0.99806	down	CRK14	cysteine-rich receptor-like protein kinase 14 [Source:EMBL;Acc:AEE84725.1]
AT4G15010	1.06639	0.0927286	up	AT4G15010	Mitochondrial substrate carrier family protein [Source:EMBL;Acc:AEE83539.1]
AT3G62260	1.59061	0.669583	up	AT3G62260	putative protein phosphatase 2C 49 [Source:EMBL;Acc:AEE80328.1]
AT1G13950	-1.57468	-0.655059	down	ELF5A-1	translation initiation factor eIF-5A [Source:EMBL;Acc:AEE29088.1]
AT2G19572	-1.03008	-0.0427521	down	AT2G19572	Potential natural antisense gene, locus overlaps with AT2G19570.[Source:TAIR;Acc:AT2G19572]
AT1G10690	1.1007	0.138422	up	AT1G10690	uncharacterized protein [Source:EMBL;Acc:AEE28629.1]
AT5G28830	-1.07097	-0.0989214	down	AT5G28830	EF-hand, calcium binding motif-containing protein [Source:EMBL;Acc:AED93842.1]
AT2G13800	1.03655	0.0517931	up	SERK5	somatic embryogenesis receptor kinase 5 [Source:EMBL;Acc:AEC06260.1]
AT3G13560	-1.16212	-0.216759	down	AT3G13560	glucan endo-1,3-beta-glucosidase 4 [Source:EMBL;Acc:AEE75374.1]
AT2G05630	-1.16496	-0.220278	down	ATG8D	autophagy-related protein 8d [Source:EMBL;Acc:AEC05959.1]
AT1G04990	-1.15159	-0.203624	down	AT1G04990	zinc finger CCCH domain-containing protein 3 [Source:EMBL;Acc:AEE27776.1]
AT1G72700	1.15921	0.213142	up	AT1G72700	phospholipid-translocating ATPase [Source:EMBL;Acc:AEE35362.1]
AT2G01650	1.0788	0.109429	up	PUX2	UBX domain-containing protein 2 [Source:EMBL;Acc:AEC05479.1]
AT1G68690	-1.471	-0.556796	down	AT1G68690	protein kinase-like protein [Source:EMBL;Acc:AEE34828.1]
AT2G36800	1.62083	0.696734	up	DOGT1	cytokinin-O-glucosyltransferase 3 [Source:EMBL;Acc:AEC09299.1]
AT4G39210	-1.06565	-0.0917362	down	APL3	glucose-1-phosphate adenylyltransferase large subunit 3 [Source:EMBL;Acc:AEE87038.1]
AT3G05650	-1.94728	-0.961463	down	AtRLP32	receptor like protein 32 [Source:EMBL;Acc:AEE74272.1]
AT4G32208	1.79456	0.843629	up	AT4G32208	heat shock protein 70 (Hsp 70) family protein [Source:EMBL;Acc:AEE86021.1]
AT3G18485	1.14436	0.194545	up	ILR2	iaa-leucine resistant 2 [Source:EMBL;Acc:AEE76103.1]
AT1G75730	1.00008	0.00011605	up	AT1G75730	uncharacterized protein [Source:EMBL;Acc:AEE35753.1]
AT3G20250	-1.00043	-0.000615448	down	APUM5	pumilio 5 [Source:EMBL;Acc:AEE76352.1]
AT5G47140	1.12138	0.165273	up	GATA27	GATA transcription factor 27 [Source:EMBL;Acc:AED95475.1]
AT3G58570	1.08494	0.117613	up	AT3G58570	DEAD-box ATP-dependent RNA helicase 52 [Source:EMBL;Acc:AEE79800.1]
AT2G31730	1.30973	0.389267	up	AT2G31730	basic helix-loop-helix domain-containing protein [Source:EMBL;Acc:AEC08578.1]
AT4G25900	-1.22554	-0.293414	down	AT4G25900	aldose 1-epimerase family protein [Source:EMBL;Acc:AEE85131.1]
AT2G30550	1.12964	0.175867	up	AT2G30550	phospholipase A1-Igamma2 [Source:EMBL;Acc:AEC08406.1]
AT1G03550	1.51781	0.601996	up	AT1G03550	secretory carrier-associated membrane protein 2 [Source:EMBL;Acc:AEE27585.1]
AT3G11840	-1.4224	-0.50833	down	PUB24	plant U-box 24 protein [Source:EMBL;Acc:AEE75107.1]
AT2G03120	-1.20035	-0.263458	down	ATSPP	minor histocompatibility antigen H13 [Source:EMBL;Acc:AEC05665.1]
AT1G69720	-1.83176	-0.873234	down	HO3	heme oxygenase 3 [Source:EMBL;Acc:AEE34967.1]
AT2G41250	1.02298	0.032774	up	AT2G41250	haloacid dehalogenase-like hydrolase domain-containing protein [Source:EMBL;Acc:AEC09953.1]
AT2G26600	-1.09921	-0.136473	down	AT2G26600	glycosyl hydrolases family 17 domain-containing protein [Source:EMBL;Acc:AEC07866.1]
AT5G24810	1.13771	0.186131	up	AT5G24810	ABC1 family protein [Source:EMBL;Acc:AED93365.1]
AT5G04720	1.08984	0.124122	up	ADR1-L2	ADR1-like 2 protein [Source:EMBL;Acc:AED90775.1]
AT1G64460	1.71422	0.777554	up	AT1G64460	protein kinase-like protein [Source:EMBL;Acc:AEE34243.1]
AT5G42440	-1.3276	-0.408826	down	AT5G42440	protein kinase family protein [Source:EMBL;Acc:AED94811.1]
AT4G30500	-1.73896	-0.798223	down	AT4G30500	uncharacterized protein [Source:EMBL;Acc:AEE85773.1]
AT1G65486	-1.16433	-0.219498	down	AT1G65486	uncharacterized protein [Source:EMBL;Acc:AEE34388.1]
AT3G07680	-1.11651	-0.158998	down	AT3G07680	emp24/gp25L/p24 family/GOLD domain-containing protein [Source:EMBL;Acc:AEE74586.1]
AT4G21940	1.22096	0.288018	up	CPK15	calcium-dependent protein kinase 15 [Source:EMBL;Acc:AEE84532.1]
AT3G22550	1.03812	0.0539754	up	AT3G22550	uncharacterized protein [Source:EMBL;Acc:AEE76652.1]
AT3G28480	-1.12522	-0.170208	down	AT3G28480	prolyl 4-hydroxylase [Source:EMBL;Acc:AEE77450.1]
AT3G09490	-1.39803	-0.483394	down	AT3G09490	tetratricopeptide repeat domain-containing protein [Source:EMBL;Acc:AEE74773.1]
AT1G61640	1.64872	0.721349	up	AT1G61640	aarF domain-containing kinase [Source:EMBL;Acc:AEE33866.1]
AT4G39190	-1.05369	-0.0754547	down	AT4G39190	uncharacterized protein [Source:EMBL;Acc:AEE87035.1]
AT3G20510	-1.13988	-0.188885	down	AT3G20510	Transmembrane proteins 14C [Source:EMBL;Acc:AEE76389.1]
AT3G57630	-1.14637	-0.197074	down	AT3G57630	exostosin family protein [Source:EMBL;Acc:AEE79680.1]
AT3G19970	1.52786	0.611509	up	AT3G19970	uncharacterized protein [Source:EMBL;Acc:AEE76314.1]
AT2G31390	1.0342	0.0485156	up	AT2G31390	fructokinase [Source:EMBL;Acc:AEC08541.1]
AT2G33530	-1.00947	-0.0135975	down	scpl46	serine carboxypeptidase-like 46 [Source:EMBL;Acc:AEC08849.1]
AT5G07770	-1.4656	-0.551487	down	AT5G07770	formin-like protein 16 [Source:EMBL;Acc:AED91202.1]
AT2G19570	1.00903	0.0129698	up	CDA1	cytidine deaminase 1 [Source:EMBL;Acc:AEC06896.1]
AT4G37640	-1.01112	-0.0159515	down	ACA2	Ca2+-transporting ATPase [Source:EMBL;Acc:AEE86819.1]
AT5G08300	1.08242	0.114258	up	AT5G08300	Succinyl-CoA ligase [GDP-forming] subunit alpha-1 [Source:EMBL;Acc:AED91279.1]
AT4G08850	-1.01141	-0.0163615	down	AT4G08850	Leucine-rich repeat-containing protein [Source:EMBL;Acc:AEE82683.1]
AT1G23010	-1.15816	-0.21184	down	LPR1	cupredoxin-like protein [Source:EMBL;Acc:AEE30321.1]
AT1G50520	1.07704	0.107075	up	CYP705A27	cytochrome P450, family 705, subfamily A, polypeptide 27 [Source:EMBL;Acc:AEE32560.1]
AT4G21610	-1.3653	-0.449223	down	LOL2	lsd one like 2 protein [Source:EMBL;Acc:AEE84480.1]
AT1G49050	1.01824	0.0260706	up	AT1G49050	aspartyl protease [Source:EMBL;Acc:AEE32389.1]
AT1G48320	1.13824	0.18681	up	AT1G48320	thioesterase-like protein [Source:EMBL;Acc:AEE32274.1]
AT5G62620	1.24697	0.318423	up	AT5G62620	putative beta-1,3-galactosyltransferase 19 [Source:EMBL;Acc:AED97632.1]
AT5G41740	1.07746	0.107635	up	AT5G41740	TIR-NBS-LRR class disease resistance protein [Source:EMBL;Acc:AED94718.1]
AT4G30230	-1.48495	-0.57041	down	AT4G30230	uncharacterized protein [Source:EMBL;Acc:AEE85741.1]
AT4G13918	1.23372	0.303017	up	AT4G13918	Potential natural antisense gene, locus overlaps with AT4G13920.[Source:TAIR;Acc:AT4G13918]
AT4G11840	-1.0418	-0.0590769	down	PLDGAMMA3	phospholipase D gamma 3 [Source:EMBL;Acc:AEE83056.1]
AT2G19710	1.32496	0.405947	up	AT2G19710	Regulator of Vps4 activity in the MVB pathway protein [Source:EMBL;Acc:AEC06916.1]
AT5G61390	-1.12636	-0.171671	down	AT5G61390	exonuclease-like protein [Source:EMBL;Acc:AED97461.1]
AT5G56350	1.08034	0.111481	up	AT5G56350	pyruvate kinase [Source:EMBL;Acc:AED96752.1]
AT2G17290	-1.12997	-0.176282	down	ATCPK6	Calcium-dependent protein kinase family protein [Source:EMBL;Acc:AEC06609.1]
AT1G42990	-1.05305	-0.0745729	down	BZIP60	bZIP transcription factor 60 [Source:EMBL;Acc:AEE31935.1]
AT4G01870	-1.20937	-0.274251	down	AT4G01870	tolB-related protein [Source:EMBL;Acc:AEE82088.1]
AT3G47810	-1.02829	-0.0402412	down	MAG1	vacuolar protein sorting 29 protein [Source:EMBL;Acc:AEE78333.1]
AT5G14930	-1.18526	-0.245207	down	SAG101	senescence-associated protein 101 [Source:EMBL;Acc:AED92091.1]
AT2G40520	-1.33563	-0.417518	down	AT2G40520	nucleotidyltransferase protein [Source:EMBL;Acc:AEC09843.1]
AT5G53048	1.35325	0.436426	up	AT5G53048	(AT5G53048) otherRNA [Source:RefSeq DNA;Acc:NR_023249]
AT1G30410	-1.11595	-0.158267	down	ATMRP13	multidrug resistance-associated protein 13 [Source:EMBL;Acc:AEE31214.1]
AT2G41490	-1.42885	-0.514857	down	GPT	UDP-glcnac-adolichol phosphate glcnac-1-p-transferase [Source:EMBL;Acc:AEC09990.1]
AT1G59710	-1.02116	-0.0302102	down	AT1G59710	uncharacterized protein [Source:EMBL;Acc:AEE33606.1]
AT1G68300	1.00566	0.00813611	up	AT1G68300	universal stress protein domain-containing protein [Source:EMBL;Acc:AEE34778.1]
AT5G64552	1.61849	0.69465	up	CPuORF22	conserved peptide upstream open reading frame 22 [Source:EMBL;Acc:AED97919.1]
AT5G64550	1.61849	0.69465	up	AT5G64550	loricrin-related protein [Source:EMBL;Acc:AED97918.1]
AT4G23170	-1.30297	-0.381804	down	EP1	putative cysteine-rich receptor-like protein kinase 9 [Source:EMBL;Acc:AEE84718.1]
AT1G74210	1.52642	0.610152	up	AT1G74210	glycerophosphoryl diester phosphodiesterase [Source:EMBL;Acc:AEE35566.1]
AT3G50910	1.44395	0.530021	up	AT3G50910	uncharacterized protein [Source:EMBL;Acc:AEE78724.1]
AT1G67940	1.44333	0.529402	up	ATNAP3	ABC transporter I family member 17 [Source:EMBL;Acc:AEE34724.1]
AT3G49320	1.15908	0.212975	up	AT3G49320	Metal-dependent protein hydrolase [Source:EMBL;Acc:AEE78528.1]
AT2G33210	1.99072	0.993294	up	HSP60-2	chaperonin CPN60-like 1 [Source:EMBL;Acc:AEC08799.1]
AT5G17190	1.20475	0.268736	up	AT5G17190	uncharacterized protein [Source:EMBL;Acc:AED92394.1]
AT3G59820	1.7544	0.810979	up	AT3G59820	LETM1-like protein [Source:EMBL;Acc:AEE79972.1]
AT2G30250	-1.02847	-0.040502	down	WRKY25	putative WRKY transcription factor 25 [Source:EMBL;Acc:AEC08362.1]
AT3G13330	-1.0211	-0.0301259	down	PA200	proteasome activator subunit 4 [Source:EMBL;Acc:AEE75334.1]
AT3G05660	-1.1422	-0.191817	down	RLP33	receptor like protein 33 [Source:EMBL;Acc:AEE74273.1]
AT5G20400	-2.60466	-1.38109	down	AT5G20400	oxidoreductase, 2OG-Fe(II) oxygenase family protein [Source:EMBL;Acc:AED92839.1]
AT2G24600	-1.34127	-0.4236	down	AT2G24600	ankyrin repeat-containing protein [Source:EMBL;Acc:AEC07600.1]
AT4G33300	-1.18758	-0.248019	down	ADR1-L1	putative disease resistance protein ADR1-like 1 [Source:EMBL;Acc:AEE86204.1]
AT5G51630	1.26023	0.333684	up	AT5G51630	TIR-NBS-LRR class disease resistance protein [Source:EMBL;Acc:AED96108.1]
AT4G37150	-1.26696	-0.341368	down	ATMES9	methyl esterase 9 [Source:EMBL;Acc:AEE86759.1]
AT2G45680	-1.10815	-0.148159	down	AT2G45680	transcription factor TCP9 [Source:EMBL;Acc:AEC10586.1]
AT3G26170	-1.16728	-0.223156	down	CYP71B19	cytochrome P450 71B19 [Source:EMBL;Acc:AEE77129.1]
AT2G39210	-1.28029	-0.356469	down	AT2G39210	major facilitator protein [Source:EMBL;Acc:AEC09646.1]
AT2G44510	1.37204	0.456324	up	AT2G44510	protein BCCIP-like protein [Source:EMBL;Acc:AEC10431.1]
AT2G40950	1.08449	0.117017	up	BZIP17	basic helix-loop-helix domain-containing protein [Source:EMBL;Acc:AEC09905.1]
AT1G16500	-1.31039	-0.389992	down	AT1G16500	uncharacterized protein [Source:EMBL;Acc:AEE29462.1]
AT4G29900	-1.21684	-0.283143	down	ACA10	Ca2+-transporting ATPase [Source:EMBL;Acc:AEE85690.1]
AT2G43850	-1.10856	-0.148686	down	AT2G43850	Integrin-linked protein kinase-like protein [Source:EMBL;Acc:AEC10335.1]
AT3G13790	1.06553	0.0915692	up	ATCWINV1	beta-fructofuranosidase [Source:EMBL;Acc:AEE75414.1]
AT5G18310	-1.35691	-0.440329	down	AT5G18310	uncharacterized protein [Source:EMBL;Acc:AED92538.1]
AT2G17720	-1.30431	-0.383284	down	AT2G17720	2-oxoglutarate (2OG) and Fe(II)-dependent oxygenase-like protein [Source:EMBL;Acc:AEC06673.1]
AT4G37260	2.22223	1.15201	up	MYB73	myb domain protein 73 [Source:EMBL;Acc:AEE86774.1]
AT4G34150	1.06448	0.0901486	up	AT4G34150	calcium-dependent lipid-binding domain-containing protein [Source:EMBL;Acc:AEE86334.1]
AT2G16710	-1.00072	-0.00103791	down	AT2G16710	Iron-sulfur assembly protein IscA-like 1 [Source:EMBL;Acc:AEC06529.1]
AT4G00490	1.07433	0.103443	up	BMY9	beta-amylase 2 [Source:EMBL;Acc:AEE81889.1]
AT5G39950	-1.1355	-0.183324	down	TRX2	thioredoxin H2 [Source:EMBL;Acc:AED94495.1]
AT1G10410	-1.26883	-0.343501	down	AT1G10410	uncharacterized protein [Source:EMBL;Acc:AEE28577.1]
AT5G25770	-1.19508	-0.257107	down	AT5G25770	esterase/lipase domain-containing protein [Source:EMBL;Acc:AED93484.1]
AT2G44180	-1.33398	-0.41574	down	MAP2A	methionine aminopeptidase 2A [Source:EMBL;Acc:AEC10386.1]
AT4G10270	-2.76585	-1.46772	down	AT4G10270	putative wound-responsive protein [Source:EMBL;Acc:AEE82862.1]
AT4G01540	1.98068	0.985997	up	ANAC068	NAC domain-containing protein 68 [Source:EMBL;Acc:AEE82038.1]
AT5G11910	1.24396	0.314939	up	AT5G11910	putative esterase-like protein [Source:EMBL;Acc:AED91738.1]
AT2G23680	1.00135	0.00195092	up	AT2G23680	cold acclimation protein WCOR413-like protein [Source:EMBL;Acc:AEC07480.1]
AT4G29160	1.07031	0.0980291	up	SNF7.1	vacuolar protein sorting-associated protein 32-2 [Source:EMBL;Acc:AEE85594.1]
AT3G45310	1.15205	0.204198	up	AT3G45310	thiol protease aleurain-like protein [Source:EMBL;Acc:AEE78021.1]
AT4G21580	-1.03871	-0.0547994	down	AT4G21580	putative NADPH quinone oxidoreductase [Source:EMBL;Acc:AEE84474.1]
AT1G77500	1.35005	0.433015	up	AT1G77500	uncharacterized protein [Source:EMBL;Acc:AEE35986.1]
AT2G21970	1.31171	0.391447	up	2002-09-01	stress enhanced protein 2 [Source:EMBL;Acc:AEC07247.1]
AT2G39270	-1.10403	-0.142779	down	AT2G39270	P-loop containing nucleoside triphosphate hydrolase-like protein [Source:EMBL;Acc:AEC09652.1]
AT3G26590	1.03478	0.0493294	up	AT3G26590	mate efflux domain-containing protein [Source:EMBL;Acc:AEE77183.1]
AT4G02050	-1.23419	-0.303565	down	STP7	sugar transport protein 7 [Source:EMBL;Acc:AEE82116.1]
AT4G22592	-1.0165	-0.0236052	down	CPuORF27	uncharacerized protein [Source:EMBL;Acc:AEE84628.1]
AT4G22590	-1.0165	-0.0236052	down	TPPG	haloacid dehalogenase-like hydrolase domain-containing protein [Source:EMBL;Acc:AEE84627.1]
AT3G02520	-1.10833	-0.148383	down	GRF7	14-3-3-like protein GF14 nu [Source:EMBL;Acc:AEE73822.1]
AT5G62150	-2.88819	-1.53017	down	AT5G62150	peptidoglycan-binding LysM domain-containing protein [Source:EMBL;Acc:AED97570.1]
AT5G37260	2.26244	1.17788	up	RVE2	protein REVEILLE 2 / DNA binding / transcription factor [Source:EMBL;Acc:AED94158.1]
AT2G45070	-1.08084	-0.112158	down	SEC61 BETA	protein transport protein sec61 subunit beta [Source:EMBL;Acc:AEC10505.1]
AT2G37710	1.04804	0.0676912	up	RLK	receptor lectin kinase [Source:EMBL;Acc:AEC09438.1]
AT5G54840	-1.16943	-0.225808	down	ATSGP1	Ras-related small GTP-binding family protein [Source:EMBL;Acc:AED96547.1]
AT1G16470	1.02199	0.0313743	up	PAB1	proteasome subunit alpha type-2-A [Source:EMBL;Acc:AEE29458.1]
AT3G51660	-1.81678	-0.861384	down	AT3G51660	macrophage migration inhibitory factor family protein [Source:EMBL;Acc:AEE78824.1]
AT5G12890	1.01698	0.0242853	up	AT5G12890	UDP-glycosyltransferase-like protein [Source:EMBL;Acc:AED91826.1]
AT5G42300	1.01514	0.0216751	up	UBL5	ubiquitin-like protein 5 [Source:EMBL;Acc:AED94793.1]
AT1G66590	1.19457	0.256495	up	COX19-1	cytochrome c oxidase 19-1 [Source:EMBL;Acc:AEE34533.1]
AT3G15518	-1.22632	-0.294341	down	AT3G15518	uncharacterized protein [Source:EMBL;Acc:AEE75685.1]
AT4G08470	-1.61821	-0.694395	down	MEKK3	MAPK/ERK kinase kinase 3 [Source:EMBL;Acc:AEE82648.1]
AT2G47640	1.07499	0.104317	up	AT2G47640	small nuclear ribonucleoprotein D2 [Source:EMBL;Acc:AEC10869.1]
AT5G64430	-1.01615	-0.023118	down	AT5G64430	octicosapeptide/Phox/Bem1p domain-containing protein [Source:EMBL;Acc:AED97892.1]
AT1G55910	1.06397	0.0894524	up	ZIP11	zinc transporter 11 [Source:EMBL;Acc:AEE33318.1]
AT1G63460	-1.16759	-0.223536	down	ATGPX8	glutathione peroxidase [Source:EMBL;Acc:AEE34102.1]
AT5G21090	-1.18248	-0.24182	down	AT5G21090	leucine-rich repeat-containing protein [Source:EMBL;Acc:AED92930.1]
AT3G19930	-1.31256	-0.392386	down	STP4	sugar transport protein 4 [Source:EMBL;Acc:AEE76309.1]
AT2G48030	-1.71447	-0.777764	down	AT2G48030	endonuclease/exonuclease/phosphatase domain-containing protein [Source:EMBL;Acc:AEC10926.1]
AT2G30424	1.29617	0.374258	up	TCL2	protein trichomeless 2 [Source:EMBL;Acc:AEC08386.1]
AT1G30620	-1.03777	-0.0534897	down	MUR4	UDP-arabinose 4-epimerase [Source:EMBL;Acc:AEE31253.1]
AT4G22305	-1.45134	-0.537388	down	AT4G22305	alpha/beta-hydrolase-like protein [Source:EMBL;Acc:AEE84590.1]
AT3G17609	1.2088	0.273572	up	HYH	transcription factor HY5-like protein [Source:EMBL;Acc:AEE75976.1]
AT5G47180	1.18147	0.240582	up	AT5G47180	VAMP (vesicle-associated membrane protein) family protein [Source:EMBL;Acc:AED95481.1]
AT1G52600	-1.06244	-0.0873861	down	AT1G52600	signal peptidase, endoplasmic reticulum-type [Source:EMBL;Acc:AEE32828.1]
AT4G01720	-1.16981	-0.226274	down	WRKY47	putative WRKY transcription factor 47 [Source:EMBL;Acc:AEE82069.1]
AT2G16700	1.05093	0.071662	up	ADF5	actin depolymerizing factor 5 [Source:EMBL;Acc:AEC06527.1]
AT5G52900	-1.10691	-0.146538	down	AT5G52900	uncharacterized protein [Source:EMBL;Acc:AED96275.1]
AT2G35810	1.20708	0.271516	up	AT2G35810	uncharacterized protein [Source:EMBL;Acc:AEC09164.1]
AT1G22840	1.15799	0.211623	up	CYTC-1	cytochrome C-1 [Source:EMBL;Acc:AEE30295.1]
AT1G68585	-1.09188	-0.126821	down	AT1G68585	uncharacterized protein [Source:EMBL;Acc:AEE34815.1]
AT4G18930	-1.33102	-0.412537	down	AT4G18930	cyclic phosphodiesterase [Source:EMBL;Acc:AEE84108.1]
AT5G05190	1.25335	0.325786	up	AT5G05190	uncharacterized protein [Source:EMBL;Acc:AED90839.1]
AT4G19370	-1.35543	-0.43875	down	AT4G19370	uncharacterized protein [Source:EMBL;Acc:AEE84173.1]
AT5G61010	1.11791	0.160801	up	ATEXO70E2	exocyst complex component 7 [Source:EMBL;Acc:AED97411.1]
AT2G35020	-1.04721	-0.0665484	down	GlcNAc1pUT2	putative UDP-N-acetylglucosamine pyrophosphorylase [Source:EMBL;Acc:AEC09050.1]
AT2G32920	-1.09611	-0.132396	down	ATPDIL2-3	protein disulfide-isomerase A6 [Source:EMBL;Acc:AEC08762.1]
AT4G21800	-1.14237	-0.192033	down	QQT2	XPA-binding protein 1 [Source:EMBL;Acc:AEE84505.1]
AT5G24205	-1.06079	-0.0851426	down	AT5G24205	other RNA.[Source:TAIR;Acc:AT5G24205]
AT5G06750	1.01447	0.0207319	up	AT5G06750	putative protein phosphatase 2C 68 [Source:EMBL;Acc:AED91060.1]
AT5G04930	-1.16948	-0.225865	down	ALA1	phospholipid-transporting ATPase 1 [Source:EMBL;Acc:AED90805.1]
AT5G17640	1.04531	0.063927	up	AT5G17640	uncharacterized protein [Source:EMBL;Acc:AED92451.1]
AT5G58120	1.4757	0.561397	up	AT5G58120	TIR-NBS-LRR class disease resistance protein [Source:EMBL;Acc:AED96999.1]
AT3G55470	-1.40204	-0.487532	down	AT3G55470	calcium-dependent lipid-binding domain-containing protein [Source:EMBL;Acc:AEE79389.1]
AT4G28490	1.09381	0.129357	up	RLK5	receptor-like protein kinase 5 [Source:EMBL;Acc:AEE85494.1]
AT4G28060	-1.02393	-0.0341101	down	AT4G28060	cytochrome c oxidase, subunit 6b [Source:EMBL;Acc:AEE85432.1]
AT5G02100	1.21853	0.285141	up	UNE18	Oxysterol-binding family protein [Source:EMBL;Acc:AED90431.1]
AT3G15350	-1.2355	-0.305092	down	AT3G15350	Core-2/I-branching beta-1,6-N-acetylglucosaminyltransferase family protein [Source:EMBL;Acc:AEE75646.1]
AT2G31990	-1.34516	-0.427778	down	AT2G31990	exostosin-like protein [Source:EMBL;Acc:AEC08617.1]
AT3G54810	1.01933	0.0276184	up	GATA8	GATA transcription factor 8 [Source:EMBL;Acc:AEE79294.1]
AT1G32330	1.30915	0.388628	up	ATHSFA1D	heat stress transcription factor A-1d [Source:EMBL;Acc:AEE31464.1]
AT4G22530	-2.1743	-1.12055	down	AT4G22530	S-adenosyl-L-methionine-dependent methyltransferase domain-containing protein [Source:EMBL;Acc:AEE84618.1]
AT5G40760	-1.21549	-0.281542	down	G6PD6	glucose-6-phosphate dehydrogenase 6 [Source:EMBL;Acc:AED94591.1]
AT5G43780	1.13779	0.186237	up	APS4	sulfate adenylyltransferase [Source:EMBL;Acc:AED95009.1]
AT5G66210	1.12085	0.164597	up	CPK28	calcium-dependent protein kinase 28 [Source:EMBL;Acc:AED98180.1]
AT2G42950	-1.09055	-0.125051	down	AT2G42950	Magnesium transporter CorA-like family protein [Source:EMBL;Acc:AEC10190.1]
AT3G43510	1.29958	0.378041	up	AT3G43510	transposable element gene.[Source:TAIR;Acc:AT3G43510]
AT2G22480	1.0593	0.0831083	up	PFK5	6-phosphofructokinase 5 [Source:EMBL;Acc:AEC07312.1]
AT5G09590	1.3461	0.428786	up	HSC70-5	mitochondrial HSO70 2 [Source:EMBL;Acc:AED91413.1]
AT4G14746	-1.4872	-0.572595	down	AT4G14746	uncharacterized protein [Source:EMBL;Acc:AEE83493.1]
AT4G01610	-1.00805	-0.0115696	down	AT4G01610	cathepsin B [Source:EMBL;Acc:AEE82052.1]
AT4G00960	1.8365	0.876957	up	AT4G00960	protein kinase family protein [Source:EMBL;Acc:AEE81961.1]
AT4G11670	1.14135	0.190741	up	AT4G11670	uncharacterized protein [Source:EMBL;Acc:AEE83037.1]
AT1G24147	-1.32155	-0.402229	down	AT1G24147	uncharacterized protein [Source:EMBL;Acc:AEE30484.1]
AT5G02502	-1.49893	-0.583931	down	AT5G02502	Oligosaccaryltransferase [Source:EMBL;Acc:AED90482.1]
AT3G03610	-1.04536	-0.0639951	down	AT3G03610	ELMO/CED-12 family protein [Source:EMBL;Acc:AEE73962.1]
AT1G22070	-1.06792	-0.0948083	down	TGA3	transcription factor TGA3 [Source:EMBL;Acc:AEE30193.1]
AT5G64010	-1.30337	-0.382251	down	AT5G64010	uncharacterized protein [Source:EMBL;Acc:AED97829.1]
AT1G64600	2.26999	1.18269	up	AT1G64600	copper ion binding / methyltransferase [Source:EMBL;Acc:AEE34259.1]
AT4G37520	-1.34212	-0.424515	down	AT4G37520	peroxidase 50 [Source:EMBL;Acc:AEE86805.1]
AT3G56320	1.22595	0.293904	up	AT3G56320	PAP/OAS1 substrate-binding domain-containing protein [Source:EMBL;Acc:AEE79509.1]
AT1G73130	1.60034	0.67838	up	AT1G73130	uncharacterized protein [Source:EMBL;Acc:AEE35417.1]
AT4G24690	-1.04462	-0.0629797	down	AT4G24690	ubiquitin-associated (UBA) zinc-finger and PB1 domain-containing protein [Source:EMBL;Acc:AEE84943.1]
AT3G11820	-1.04899	-0.0690044	down	PEN1	syntaxin-121 [Source:EMBL;Acc:AEE75102.1]
AT1G67800	-1.05357	-0.0752818	down	AT1G67800	Copine (Calcium-dependent phospholipid-binding protein) family protein [Source:EMBL;Acc:AEE34700.1]
AT5G13190	-1.03036	-0.0431484	down	AT5G13190	uncharacterized protein [Source:EMBL;Acc:AED91862.1]
AT5G42150	1.35012	0.433085	up	AT5G42150	Glutathione S-transferase family protein [Source:EMBL;Acc:AED94774.1]
AT5G42530	-1.5746	-0.654986	down	AT5G42530	uncharacterized protein [Source:EMBL;Acc:AED94823.1]
AT5G66140	1.34767	0.430468	up	PAD2	proteasome subunit alpha type-7-B [Source:EMBL;Acc:AED98164.1]
AT2G12550	1.08927	0.12336	up	AT2G12550	ubiquitin-associated (UBA)/TS-N domain-containing protein [Source:EMBL;Acc:AEC06204.1]
AT1G09680	-2.33382	-1.22269	down	AT1G09680	pentatricopeptide repeat-containing protein [Source:EMBL;Acc:AEE28479.1]
AT5G41860	1.01617	0.0231377	up	AT5G41860	uncharacterized protein [Source:EMBL;Acc:AED94737.1]
AT1G05720	-1.17927	-0.237899	down	AT1G05720	selenoprotein-like protein [Source:EMBL;Acc:AEE27884.1]
AT3G03440	1.1753	0.233026	up	AT3G03440	armadillo/beta-catenin-like repeat-containing protein [Source:EMBL;Acc:AEE73944.1]
AT1G62305	-1.29333	-0.371095	down	AT1G62305	Core-2/I-branching beta-1,6-N-acetylglucosaminyltransferase family protein [Source:EMBL;Acc:AEE33951.1]
AT3G45970	1.9788	0.984627	up	EXLA1	expansin-like A1 [Source:EMBL;Acc:AEE78096.1]
AT3G53120	1.00297	0.00427404	up	VPS37-1	vacuolar protein-sorting-associated protein 37-1 [Source:EMBL;Acc:AEE79039.1]
AT5G07360	-1.20567	-0.26984	down	AT5G07360	Amidase family protein [Source:EMBL;Acc:AED91142.1]
AT1G53310	1.00736	0.0105851	up	PPC1	phosphoenolpyruvate carboxylase 1 [Source:EMBL;Acc:AEE32923.1]
AT2G44500	1.21988	0.286733	up	AT2G44500	axi 1 protein-like protein [Source:EMBL;Acc:AEC10429.1]
AT2G21660	-1.26654	-0.340893	down	CCR2	glycine-rich RNA-binding protein 7 [Source:EMBL;Acc:AEC07209.1]
AT5G13200	1.15077	0.202601	up	AT5G13200	GEM-like protein 5 [Source:EMBL;Acc:AED91863.1]
AT5G26860	1.42705	0.513037	up	LON_ARA_ARA	lon protease 1 [Source:EMBL;Acc:AED93617.1]
AT3G23110	-1.23932	-0.309552	down	AtRLP37	receptor like protein 37 [Source:EMBL;Acc:AEE76719.1]
AT4G14220	-1.04001	-0.056591	down	RHF1A	E3 ubiquitin-protein ligase RHF1A [Source:EMBL;Acc:AEE83395.1]
AT2G35790	1.24804	0.319669	up	AT2G35790	uncharacterized protein [Source:EMBL;Acc:AEC09161.1]
AT5G27600	1.06052	0.0847705	up	LACS7	long-chain acyl-CoA synthetase 7 [Source:EMBL;Acc:AED93704.1]
AT1G29310	-1.21089	-0.276065	down	AT1G29310	SecY protein transport family protein [Source:EMBL;Acc:AEE31071.1]
AT5G03290	1.00995	0.0142854	up	IDH-V	Isocitrate dehydrogenase [NAD] catalytic subunit 5 [Source:EMBL;Acc:AED90581.1]
AT5G66760	1.15768	0.21124	up	SDH1-1	succinate dehydrogenase [ubiquinone] flavoprotein subunit 1 [Source:EMBL;Acc:AED98260.1]
AT1G68570	-1.06453	-0.0902163	down	AT1G68570	putative nitrite transporter [Source:EMBL;Acc:AEE34812.1]
AT4G11000	-1.14758	-0.198599	down	AT4G11000	ankyrin repeat-containing protein [Source:EMBL;Acc:AEE82960.1]
AT4G14400	-1.80319	-0.850549	down	ACD6	ankyrin repeat-containing protein [Source:EMBL;Acc:AEE83438.1]
AT2G37970	1.17956	0.23825	up	SOUL-1	SOUL heme-binding-like protein [Source:EMBL;Acc:AEC09472.1]
AT4G33920	1.31952	0.400015	up	AT4G33920	putative protein phosphatase 2C 63 [Source:EMBL;Acc:AEE86293.1]
AT2G03510	-1.0868	-0.120085	down	AT2G03510	SPFH/Band 7/PHB domain-containing membrane-associated protein [Source:EMBL;Acc:AEC05709.1]
AT5G04750	1.05223	0.073452	up	AT5G04750	putative F1F0-ATPase inhibitor protein [Source:EMBL;Acc:AED90780.1]
AT3G15352	1.33852	0.420643	up	COX17	cytochrome c oxidase subunit XVII assembly protein [Source:EMBL;Acc:AEE75654.1]
AT4G26990	-1.05246	-0.0737616	down	AT4G26990	uncharacterized protein [Source:EMBL;Acc:AEE85281.1]
AT1G17080	-1.10889	-0.149119	down	AT1G17080	ribosomal protein L18ae-like protein [Source:EMBL;Acc:AEE29538.1]
AT1G61250	-1.23051	-0.299251	down	SC3	secretory carrier-associated membrane protein 3 [Source:EMBL;Acc:AEE33812.1]
AT1G66410	1.016	0.0229015	up	CAM4	calmodulin 4 [Source:EMBL;Acc:AEE34506.1]
AT1G11330	-1.54449	-0.627135	down	AT1G11330	putative receptor-like protein kinase [Source:EMBL;Acc:AEE28718.1]
AT3G03310	1.03567	0.0505587	up	ATLCAT3	phospholipase A(1) LCAT3 [Source:EMBL;Acc:AEE73928.1]
AT1G71110	1.04637	0.065396	up	AT1G71110	uncharacterized protein [Source:EMBL;Acc:AEE35162.1]
AT1G49000	-1.96792	-0.976669	down	AT1G49000	uncharacterized protein [Source:EMBL;Acc:AEE32379.1]
AT3G60160	1.21232	0.277774	up	ATMRP9	ABC transporter C family member 9 [Source:EMBL;Acc:AEE80019.1]
AT2G37630	1.04822	0.0679445	up	MYB91	transcription factor AS1 [Source:EMBL;Acc:AEC09428.1]
AT1G13750	-1.17386	-0.231258	down	AT1G13750	putative inactive purple acid phosphatase 1 [Source:EMBL;Acc:AEE29063.1]
AT4G32940	1.05528	0.0776316	up	GAMMA-VPE	vacuolar-processing enzyme gamma-isozyme [Source:EMBL;Acc:AEE86150.1]
AT2G02230	1.03866	0.0547218	up	AtPP2-B1	F-box protein PP2-B1 [Source:EMBL;Acc:AEC05559.1]
AT3G51260	1.13445	0.181992	up	PAD1	proteasome subunit alpha type-7-A [Source:EMBL;Acc:AEE78770.1]
AT3G09390	-1.05644	-0.079209	down	ATMT-K	metallothionein 2A [Source:EMBL;Acc:AEE74760.1]
AT2G43940	1.40197	0.487454	up	ATHOL3	putative thiol methyltransferase 2 [Source:EMBL;Acc:AEC10350.1]
AT3G06450	-1.11013	-0.150728	down	AT3G06450	putative boron transporter 3 [Source:EMBL;Acc:AEE74396.1]
AT1G61570	1.20682	0.271207	up	TIM13	mitochondrial import inner membrane translocase subunit Tim13 [Source:EMBL;Acc:AEE33857.1]
AT5G10650	1.0816	0.113169	up	AT5G10650	RING/U-box domain-containing protein [Source:EMBL;Acc:AED91577.1]
AT4G13510	-1.12041	-0.164022	down	AMT1;1	ammonium transporter 1;1 [Source:EMBL;Acc:AEE83287.1]
AT1G67810	-8.57188	-3.09961	down	SUFE2	sulfur E2 [Source:EMBL;Acc:AEE34701.1]
AT1G33420	-1.09244	-0.127556	down	AT1G33420	PHD finger protein [Source:EMBL;Acc:AEE31592.1]
AT4G17070	1.02538	0.036164	up	AT4G17070	peptidyl-prolyl cis-trans isomerase [Source:EMBL;Acc:AEE83845.1]
AT1G01140	-1.26923	-0.343959	down	CIPK9	CBL-interacting serine/threonine-protein kinase 9 [Source:EMBL;Acc:AEE27243.1]
AT5G06960	-1.07531	-0.104758	down	OBF5	transcription factor TGA5 [Source:EMBL;Acc:AED91090.1]
AT1G28210	1.38227	0.46704	up	ATJ1	chaperone protein dnaJ 1 [Source:EMBL;Acc:AEE30931.1]
AT2G45685	-1.3568	-0.440213	down	AT2G45685	other RNA.[Source:TAIR;Acc:AT2G45685]
AT4G27830	-1.50131	-0.586224	down	BGLU10	beta glucosidase 10 [Source:EMBL;Acc:AEE85398.1]
AT3G55450	-1.16982	-0.22629	down	PBL1	PBS1-like 1 kinase [Source:EMBL;Acc:AEE79385.1]
AT1G67620	1.51459	0.598924	up	AT1G67620	Lojap-related protein [Source:EMBL;Acc:AEE34671.1]
AT2G41220	-1.02627	-0.0374123	down	GLU2	ferredoxin-dependent glutamate synthase 2 [Source:EMBL;Acc:AEC09945.1]
AT1G51660	-1.09246	-0.127575	down	ATMEK4	mitogen-activated protein kinase kinase 4 [Source:EMBL;Acc:AEE32696.1]
AT5G54930	1.46959	0.555417	up	AT5G54930	AT hook motif-containing protein [Source:EMBL;Acc:AED96558.1]
AT1G27450	-1.07411	-0.10314	down	ATAPT1	adenine phosphoribosyltransferase 1 [Source:EMBL;Acc:AEE30832.1]
AT1G17600	-1.03245	-0.0460717	down	AT1G17600	TIR-NBS-LRR class disease resistance protein [Source:EMBL;Acc:AEE29612.1]
AT2G17840	-1.02415	-0.0344216	down	ERD7	senescence/dehydration related protein [Source:EMBL;Acc:AEC06693.1]
AT4G00550	1.01135	0.0162868	up	DGD2	digalactosyldiacylglycerol synthase 2 [Source:EMBL;Acc:AEE81898.1]
AT3G09830	1.01156	0.0165853	up	AT3G09830	protein kinase domain-containing protein [Source:EMBL;Acc:AEE74819.1]
AT3G27890	-1.01429	-0.0204709	down	NQR	NADPH:quinone oxidoreductase [Source:EMBL;Acc:AEE77376.1]
AT4G02930	1.33562	0.417511	up	AT4G02930	Elongation factor Tu [Source:EMBL;Acc:AEE82252.1]
AT5G03460	-1.05333	-0.0749543	down	AT5G03460	uncharacterized protein [Source:EMBL;Acc:AED90608.1]
AT2G23810	1.10754	0.147361	up	TET8	tetraspanin8 [Source:EMBL;Acc:AEC07493.1]
AT1G66670	1.16922	0.225546	up	CLPP3	ATP-dependent Clp protease proteolytic subunit 3 [Source:EMBL;Acc:AEE34543.1]
AT5G51220	1.48332	0.568827	up	AT5G51220	ubiquinol-cytochrome C chaperone family protein [Source:EMBL;Acc:AED96054.1]
AT5G64400	-1.01435	-0.0205552	down	AT5G64400	uncharacterized protein [Source:EMBL;Acc:AED97888.1]
AT1G15120	-1.08807	-0.121777	down	AT1G15120	Ubiquinol-cytochrome C reductase hinge protein [Source:EMBL;Acc:AEE29267.1]
AT2G22570	-1.07507	-0.10443	down	ATNIC1	nicotinamidase 1 [Source:EMBL;Acc:AEC07324.1]
AT1G26940	1.14035	0.189471	up	AT1G26940	Cyclophilin-like peptidyl-prolyl cis-trans isomerase family protein [Source:EMBL;Acc:AEE30762.1]
AT5G34940	1.17463	0.232207	up	AtGUS3	Heparanase-like protein 3 [Source:EMBL;Acc:AED93924.1]
AT3G05360	-1.38583	-0.470751	down	AtRLP30	receptor like protein 30 [Source:EMBL;Acc:AEE74225.1]
AT4G35110	1.24444	0.315495	up	AT4G35110	phospholipase-like (PEARLI 4) family protein [Source:EMBL;Acc:AEE86467.1]
AT2G41082	4.21524	2.07561	up	AT2G41082	uncharacterized protein [Source:EMBL;Acc:AEC09926.1]
AT4G17830	-1.14632	-0.197011	down	AT4G17830	acetylornithine deacetylase [Source:EMBL;Acc:AEE83954.1]
AT5G46520	-1.24988	-0.321784	down	AT5G46520	TIR-NBS-LRR class disease resistance protein [Source:EMBL;Acc:AED95394.1]
AT2G46620	-1.23876	-0.308898	down	AT2G46620	P-loop containing nucleoside triphosphate hydrolase-like protein [Source:EMBL;Acc:AEC10730.1]
AT1G11905	1.12757	0.173221	up	AT1G11905	B-cell receptor-associated protein 31-like protein [Source:EMBL;Acc:AEE28811.1]
AT2G18230	1.54717	0.629633	up	AtPPa2	soluble inorganic pyrophosphatase 2 [Source:EMBL;Acc:AEC06742.1]
AT3G46900	1.33611	0.418043	up	COPT2	copper transporter 2 [Source:EMBL;Acc:AEE78216.1]
AT1G61370	-1.08337	-0.11552	down	AT1G61370	S-locus lectin protein kinase family protein [Source:EMBL;Acc:AEE33828.1]
AT3G04120	1.07229	0.100691	up	GAPC	glyceraldehyde-3-phosphate dehydrogenase, cytosolic [Source:EMBL;Acc:AEE74039.1]
AT1G53230	1.07822	0.10865	up	TCP3	transcription factor TCP3 [Source:EMBL;Acc:AEE32909.1]
AT5G03360	1.02477	0.0353066	up	AT5G03360	DC1 domain-containing protein [Source:EMBL;Acc:AED90592.1]
AT1G22930	1.23216	0.301195	up	AT1G22930	T-complex protein 11 [Source:EMBL;Acc:AEE30312.1]
AT5G53330	-1.13419	-0.181657	down	AT5G53330	Ubiquitin-associated/translation elongation factor EF1B protein [Source:EMBL;Acc:AED96340.1]
AT3G17240	1.07456	0.103744	up	mtLPD2	dihydrolipoyl dehydrogenase 2 [Source:EMBL;Acc:AEE75926.1]
AT2G41180	1.20133	0.26463	up	AT2G41180	VQ motif-containing protein [Source:EMBL;Acc:AEC09941.1]
AT3G56030	1.09934	0.136644	up	AT3G56030	pentatricopeptide repeat-containing protein [Source:EMBL;Acc:AEE79468.1]
AT5G61380	-1.01115	-0.0159941	down	PRR1	two-component response regulator-like APRR1 [Source:EMBL;Acc:AED97460.1]
AT4G04910	-1.06874	-0.0959072	down	NSF	vesicle-fusing ATPase [Source:EMBL;Acc:AEE82440.1]
AT5G19550	1.02492	0.0355155	up	ASP2	aspartate aminotransferase [Source:EMBL;Acc:AED92724.1]
AT2G20390	1.50867	0.593281	up	AT2G20390	uncharacterized protein [Source:EMBL;Acc:AEC07002.1]
AT2G20530	1.42093	0.50684	up	PHB6	prohibitin 6 [Source:EMBL;Acc:AEC07024.1]
AT5G58290	1.02307	0.0329113	up	RPT3	regulatory particle triple-A ATPase 3 [Source:EMBL;Acc:AED97029.1]
AT5G49280	-1.08415	-0.116565	down	AT5G49280	hydroxyproline-rich glycoprotein family protein [Source:EMBL;Acc:AED95792.1]
AT3G09970	1.22686	0.294971	up	AT3G09970	calcineurin-like metallo-phosphoesterase-like protein [Source:EMBL;Acc:AEE74842.1]
AT1G66725	1.18085	0.239827	up	MIR163	MIR163 miRNA.[Source:TAIR;Acc:AT1G66725]
AT4G36210	-1.14018	-0.18926	down	AT4G36210	uncharacterized protein [Source:EMBL;Acc:AEE86633.1]
AT1G19270	-1.01224	-0.0175524	down	DA1	protein DA1 [Source:EMBL;Acc:AEE29825.1]
AT3G24503	1.24664	0.318044	up	ALDH2C4	aldehyde dehydrogenase 2C4 [Source:EMBL;Acc:AEE76907.1]
AT4G09970	1.48193	0.567477	up	AT4G09970	uncharacterized protein [Source:EMBL;Acc:AEE82822.1]
AT2G33150	-1.07567	-0.105232	down	PED1	3-ketoacyl-CoA thiolase 2 [Source:EMBL;Acc:AEC08791.1]
AT1G21370	-1.11942	-0.162745	down	AT1G21370	uncharacterized protein [Source:EMBL;Acc:AEE30095.1]
AT4G34860	-1.3944	-0.479641	down	AT4G34860	neutral invertase-like protein [Source:EMBL;Acc:AEE86430.1]
AT3G10300	-1.25105	-0.323142	down	AT3G10300	putative calcium-binding protein CML49 [Source:EMBL;Acc:AEE74885.1]
AT2G47000	1.15201	0.204148	up	PGP4	ABC transporter B family member 4 [Source:EMBL;Acc:AEC10785.1]
AT5G52640	1.18548	0.245477	up	AtHsp90-1	heat shock protein 81-1 [Source:EMBL;Acc:AED96244.1]
AT4G13615	-1.00011	-0.000155762	down	AT4G13615	uncharacterized protein [Source:EMBL;Acc:AEE83303.1]
AT3G27560	1.13993	0.188944	up	ATN1	protein kinase family protein [Source:EMBL;Acc:AEE77337.1]
AT4G18300	1.61561	0.692076	up	AT4G18300	Trimeric LpxA-like enzyme [Source:EMBL;Acc:AEE84022.1]
AT1G07890	-1.17334	-0.230616	down	APX1	L-ascorbate peroxidase [Source:EMBL;Acc:AEE28205.1]
AT3G50470	-3.12542	-1.64405	down	HR3	RPW8-like protein 3 [Source:EMBL;Acc:AEE78670.1]
AT4G05530	1.11077	0.151561	up	IBR1	dehydrogenase/reductase SDR family member 4 [Source:EMBL;Acc:AEE82532.1]
AT3G16510	1.0571	0.0801056	up	AT3G16510	Calcium-dependent lipid-binding domain-containing protein [Source:EMBL;Acc:AEE75828.1]
AT3G44100	-1.07531	-0.104755	down	AT3G44100	MD-2-related lipid recognition domain-containing protein [Source:EMBL;Acc:AEE77862.1]
AT5G64370	-1.25173	-0.32392	down	BETA-UP	beta-ureidopropionase [Source:EMBL;Acc:AED97881.1]
AT4G30150	2.03881	1.02772	up	AT4G30150	uncharacterized protein [Source:EMBL;Acc:AEE85726.1]
AT1G10865	-1.14377	-0.193803	down	AT1G10865	uncharacterized protein [Source:EMBL;Acc:AEE28657.1]
AT1G71950	1.06995	0.0975389	up	AT1G71950	Proteinase inhibitor, propeptide [Source:EMBL;Acc:AEE35257.1]
AT1G16900	-1.07416	-0.103209	down	AT1G16900	alpha-1,2-mannosyltransferase [Source:EMBL;Acc:AEE29518.1]
AT1G55265	1.34234	0.424752	up	AT1G55265	uncharacterized protein [Source:EMBL;Acc:AEE33216.1]
AT3G13235	1.01093	0.0156901	up	AT3G13235	DNA damage-inducible protein 1 [Source:EMBL;Acc:AEE75325.1]
AT5G42790	1.04213	0.0595357	up	ATPSM30	proteasome subunit alpha type-1-A [Source:EMBL;Acc:AED94864.1]
AT3G06050	-1.04545	-0.0641197	down	PRXIIF	peroxiredoxin-2F [Source:EMBL;Acc:AEE74337.1]
AT5G37070	-1.18136	-0.240452	down	AT5G37070	uncharacterized protein [Source:EMBL;Acc:AED94144.1]
AT1G72900	1.20581	0.27	up	AT1G72900	Toll-Interleukin-Resistance domain-containing protein [Source:EMBL;Acc:AEE35389.1]
AT2G37530	-1.93216	-0.950211	down	AT2G37530	uncharacterized protein [Source:EMBL;Acc:AEC09412.1]
AT1G09300	1.39702	0.482349	up	AT1G09300	metallopeptidase M24-like protein [Source:EMBL;Acc:AEE28427.1]
AT5G49570	-1.15583	-0.208928	down	AtPNG1	peptide-N(4)-(N-acetyl-beta-glucosaminyl)asparagine amidase [Source:EMBL;Acc:AED95831.1]
AT2G41460	1.52028	0.604334	up	ARP	apurinic endonuclease-redox protein [Source:EMBL;Acc:AEC09985.1]
AT4G15540	1.00625	0.00899378	up	AT4G15540	EamA-like transporter-like protein [Source:EMBL;Acc:AEE83622.1]
AT1G29060	1.01667	0.0238492	up	AT1G29060	protein transport protein SFT1 [Source:EMBL;Acc:AEE31038.1]
AT5G35590	1.0352	0.0499144	up	PAA1	proteasome subunit alpha type-6-A [Source:EMBL;Acc:AED93984.1]
AT3G21465	-1.04665	-0.0657778	down	AT3G21465	uncharacterized protein [Source:EMBL;Acc:AEE76512.1]
AT4G14850	1.45121	0.537259	up	LOI1	pentatricopeptide repeat-containing protein [Source:EMBL;Acc:AEE83509.1]
AT3G26230	-1.27847	-0.354423	down	CYP71B24	cytochrome P450 71B24 [Source:EMBL;Acc:AEE77136.1]
AT2G11520	-1.1096	-0.150035	down	CRCK3	calmodulin-binding receptor-like cytoplasmic kinase 3 [Source:EMBL;Acc:AEC06173.1]
AT5G47200	1.16798	0.224011	up	ATRABD2B	RAB GTPase-1A [Source:EMBL;Acc:AED95483.1]
AT2G43350	-1.15804	-0.211689	down	GPX3	putative glutathione peroxidase 3 [Source:EMBL;Acc:AEC10255.1]
AT2G07779	1.58963	0.668694	up	AT2G07779	uncharacterized protein [Source:EMBL;Acc:AEC06064.1]
AT1G74280	-1.19323	-0.254872	down	AT1G74280	alpha/beta-hydrolase domain-containing protein [Source:EMBL;Acc:AEE35573.1]
AT3G51000	1.02295	0.0327393	up	AT3G51000	putative epoxide hydrolase [Source:EMBL;Acc:AEE78736.1]
AT3G23600	-1.06076	-0.0850932	down	AT3G23600	dienelactone hydrolase family protein [Source:EMBL;Acc:AEE76782.1]
AT4G24970	1.08356	0.115781	up	AT4G24970	histidine kinase-like ATPase domain-containing protein [Source:EMBL;Acc:AEE84983.1]
AT3G57280	-1.35158	-0.43465	down	AT3G57280	Transmembrane proteins 14C [Source:EMBL;Acc:AEE79635.1]
AT3G58270	1.50141	0.58632	up	AT3G58270	phospholipase-like protein (PEARLI 4) with TRAF-like domain [Source:EMBL;Acc:AEE79762.1]
AT4G23570	-1.34012	-0.422362	down	SGT1A	phosphatase SGT1a [Source:EMBL;Acc:AEE84777.1]
AT4G29040	1.02538	0.0361541	up	RPT2a	26S proteasome regulatory subunit 4-A [Source:EMBL;Acc:AEE85578.1]
AT2G17200	1.01446	0.0207049	up	DSK2	ubiquitin-like protein [Source:EMBL;Acc:AEC06597.1]
AT4G26160	1.02727	0.0388123	up	ACHT1	thioredoxin-like 2-1 [Source:EMBL;Acc:AEE85165.1]
AT5G53730	-1.63797	-0.711911	down	AT5G53730	late embryogenesis abundant hydroxyproline-rich glycoprotein [Source:EMBL;Acc:AED96399.1]
AT1G51090	1.48259	0.56812	up	AT1G51090	heavy-metal-associated domain-containing protein [Source:EMBL;Acc:AEE32621.1]
AT3G60190	-1.22307	-0.290506	down	ADL1E	dynamin-related protein 1E [Source:EMBL;Acc:AEE80022.1]
AT5G64570	1.21792	0.284417	up	XYL4	beta-D-xylosidase 4 [Source:EMBL;Acc:AED97922.1]
AT4G02980	1.0533	0.0749172	up	ABP1	auxin-binding protein 1 [Source:EMBL;Acc:AEE82256.1]
AT1G74440	-1.58806	-0.667265	down	AT1G74440	uncharacterized protein [Source:EMBL;Acc:AEE35592.1]
AT3G57520	2.36746	1.24334	up	SIP2	putative galactinol--sucrose galactosyltransferase 2 [Source:EMBL;Acc:AEE79666.1]
AT5G04520	-1.10691	-0.146535	down	AT5G04520	uncharacterized protein [Source:EMBL;Acc:AED90756.1]
AT3G55605	1.49619	0.58129	up	AT3G55605	Mitochondrial glycoprotein family protein [Source:EMBL;Acc:AEE79407.1]
AT1G47480	1.45229	0.53833	up	AT1G47480	alpha/beta-hydrolase domain-containing protein [Source:EMBL;Acc:AEE32171.1]
AT1G65540	1.01016	0.0145864	up	AT1G65540	LETM1-like protein [Source:EMBL;Acc:AEE34393.1]
AT4G16960	1.19942	0.262332	up	AT4G16960	TIR-NBS-LRR class disease resistance protein [Source:EMBL;Acc:AEE83828.1]
AT1G21720	1.00829	0.011905	up	PBC1	proteasome subunit beta type-3-A [Source:EMBL;Acc:AEE30146.1]
AT1G76760	-1.12326	-0.167686	down	ATY1	thioredoxin Y1 [Source:EMBL;Acc:AEE35886.1]
AT1G15550	1.26479	0.338895	up	GA4	gibberellin 3-beta-dioxygenase 1 [Source:EMBL;Acc:AEE29335.1]
AT1G17430	-1.02457	-0.035025	down	AT1G17430	alpha/beta-hydrolase domain-containing protein [Source:EMBL;Acc:AEE29586.1]
AT4G02710	-1.03576	-0.0506894	down	AT4G02710	kinase interacting-like protein [Source:EMBL;Acc:AEE82216.1]
AT4G39390	-1.06263	-0.0876417	down	NST-K1	nucleotide sugar transporter-KT 1 [Source:EMBL;Acc:AEE87068.1]
AT1G09100	1.05084	0.0715402	up	RPT5B	26S proteasome regulatory subunit T5 [Source:EMBL;Acc:AEE28396.1]
AT1G65250	-1.231	-0.299826	down	AT1G65250	protein kinase-like protein [Source:EMBL;Acc:AEE34348.1]
AT2G45500	-1.08317	-0.115262	down	AT2G45500	AAA-type ATPase-like protein [Source:EMBL;Acc:AEC10562.1]
AT5G47420	-1.16776	-0.223746	down	AT5G47420	tryptophan RNA-binding attenuator-like protein [Source:EMBL;Acc:AED95507.1]
AT3G50060	2.09822	1.06917	up	MYB77	myb domain protein 77 [Source:EMBL;Acc:AEE78622.1]
AT5G11520	-1.0153	-0.0219113	down	YLS4	aspartate aminotransferase [Source:EMBL;Acc:AED91691.1]
AT1G16040	-1.14745	-0.198426	down	AT1G16040	uncharacterized protein [Source:EMBL;Acc:AEE29403.1]
AT3G12740	-1.11278	-0.154168	down	ALIS1	ALA-interacting subunit 1 [Source:EMBL;Acc:AEE75241.1]
AT1G62810	-1.38305	-0.467851	down	AT1G62810	Primary amine oxidase [Source:EMBL;Acc:AEE34008.1]
AT5G40650	1.13268	0.179744	up	SDH2-2	succinate dehydrogenase [ubiquinone] iron-sulfur subunit 2 [Source:EMBL;Acc:AED94578.1]
AT2G17420	1.00552	0.0079349	up	NTRA	NADPH-dependent thioredoxin reductase A [Source:EMBL;Acc:AEC06623.1]
AT3G50210	-1.0015	-0.00215882	down	AT3G50210	2-oxoglutarate-Fe(II)-dependent oxygenase domain-containing protein [Source:EMBL;Acc:AEE78639.1]
AT5G63030	-1.09018	-0.12457	down	AT5G63030	glutaredoxin-C1 [Source:EMBL;Acc:AED97688.1]
AT4G18010	-1.09829	-0.135261	down	IP5PII	Type I inositol-1,4,5-trisphosphate 5-phosphatase 2 [Source:EMBL;Acc:AEE83979.1]
AT3G09020	-1.55336	-0.635391	down	AT3G09020	lactosylceramide 4-alpha-galactosyltransferase [Source:EMBL;Acc:AEE74709.1]
AT3G14130	-1.47939	-0.565004	down	AT3G14130	Aldolase-type TIM barrel family protein [Source:EMBL;Acc:AEE75475.1]
AT3G07780	1.09083	0.125427	up	OBE1	protein OBERON 1 [Source:EMBL;Acc:AEE74603.1]
AT5G50315	1.20179	0.265188	up	AT5G50315	transposable element gene.[Source:TAIR;Acc:AT5G50315]
AT2G31200	-1.09072	-0.125285	down	ATADF6	actin depolymerizing factor 6 [Source:EMBL;Acc:AEC08507.1]
AT5G65920	1.66674	0.737033	up	AT5G65920	U-box domain-containing protein 31 [Source:EMBL;Acc:AED98123.1]
AT5G41180	1.38337	0.468191	up	AT5G41180	putative leucine-rich repeat transmembrane protein kinase [Source:EMBL;Acc:AED94651.1]
AT5G56660	1.0819	0.113561	up	ILL2	IAA-amino acid hydrolase ILR1-like 2 [Source:EMBL;Acc:AED96793.1]
AT3G60520	-1.64196	-0.71542	down	AT3G60520	uncharacterized protein [Source:EMBL;Acc:AEE80074.1]
AT3G25600	1.31659	0.39681	up	AT3G25600	putative calcium-binding protein CML16 [Source:EMBL;Acc:AEE77041.1]
AT3G19150	-1.11803	-0.160961	down	KRP6	cyclin-dependent kinase inhibitor 6 [Source:EMBL;Acc:AEE76199.1]
AT5G04885	-1.19318	-0.254808	down	AT5G04885	Glycosyl hydrolase family protein [Source:EMBL;Acc:AED90799.1]
AT3G16700	1.56027	0.641794	up	AT3G16700	fumarylacetoacetate hydrolase [Source:EMBL;Acc:AEE75854.1]
AT3G16990	-1.30755	-0.386871	down	AT3G16990	heme oxygenase-like, multi-helical protein [Source:EMBL;Acc:AEE75892.1]
AT1G17890	-1.02721	-0.0387271	down	GER2	GDP-L-fucose synthase [Source:EMBL;Acc:AEE29649.1]
AT2G41110	-1.22999	-0.298643	down	CAM2	calmodulin 2 [Source:EMBL;Acc:AEC09932.1]
AT3G14460	-1.32751	-0.408727	down	AT3G14460	LRR and NB-ARC domain-containing disease resistance protein [Source:EMBL;Acc:AEE75529.1]
AT5G45010	1.03862	0.0546646	up	ATDSS1(V)	26 proteasome complex subunit DSS1 [Source:EMBL;Acc:AED95188.1]
AT3G24180	1.10617	0.145569	up	AT3G24180	Beta-glucosidase, GBA2 type family protein [Source:EMBL;Acc:AEE76869.1]
AT2G40765	-1.00952	-0.0136763	down	AT2G40765	uncharacterized protein [Source:EMBL;Acc:AEC09875.1]
AT4G25225	1.29119	0.368696	up	AT4G25225	uncharacterized protein [Source:EMBL;Acc:AEE85027.1]
AT1G28510	1.16454	0.219759	up	AT1G28510	Optic atrophy 3 protein (OPA3) [Source:EMBL;Acc:AEE30985.1]
AT1G32210	-1.05254	-0.0738783	down	ATDAD1	dolichyl-diphosphooligosaccharide--protein glycosyltransferase subunit DAD1 [Source:EMBL;Acc:AEE31449.1]
AT2G27020	1.16485	0.220149	up	PAG1	proteasome subunit alpha type-3 [Source:EMBL;Acc:AEC07923.1]
AT2G01860	1.20891	0.273707	up	EMB975	pentatricopeptide repeat-containing protein [Source:EMBL;Acc:AEC05509.1]
AT3G63080	-1.19368	-0.255412	down	ATGPX5	glutathione peroxidase [Source:EMBL;Acc:AEE80432.1]
AT5G49410	-1.06714	-0.0937514	down	AT5G49410	uncharacterized protein [Source:EMBL;Acc:AED95808.1]
AT3G01800	1.44271	0.528777	up	AT3G01800	ribosome recycling factor [Source:EMBL;Acc:AEE73716.1]
AT1G33265	-1.21698	-0.283305	down	AT1G33265	Transmembrane proteins 14C [Source:EMBL;Acc:AEE31577.1]
AT5G61030	1.78485	0.835806	up	GR-RBP3	glycine-rich RNA-binding protein 3 [Source:EMBL;Acc:AED97414.1]
AT2G45910	1.04512	0.0636638	up	AT2G45910	U-box domain-containing protein 33 [Source:EMBL;Acc:AEC10616.1]
AT3G14470	1.01473	0.0211029	up	AT3G14470	putative disease resistance RPP13-like protein 1 [Source:EMBL;Acc:AEE75530.1]
AT2G34250	-1.10481	-0.143792	down	AT2G34250	protein transport protein SEC61 subunit alpha [Source:EMBL;Acc:AEC08944.1]
AT4G13850	1.20502	0.269052	up	GR-RBP2	glycine-rich RNA-binding protein 2 [Source:EMBL;Acc:AEE83336.1]
AT1G17450	-1.05585	-0.078406	down	AT1G17450	B-block binding subunit of TFIIIC [Source:EMBL;Acc:AEE29589.1]
AT2G32160	-1.07463	-0.103841	down	AT2G32160	N2227-like domain-containing protein [Source:EMBL;Acc:AEC08641.1]
AT1G60420	1.01674	0.0239503	up	AT1G60420	putative nucleoredoxin 1 [Source:EMBL;Acc:AEE33684.1]
AT1G79520	1.45379	0.539818	up	AT1G79520	Cation efflux family protein [Source:EMBL;Acc:AEE36259.1]
AT3G17700	-1.00946	-0.0135781	down	CNGC20	cyclic nucleotide gated channel [Source:EMBL;Acc:AEE75994.1]
AT1G50740	-1.29695	-0.375119	down	AT1G50740	Transmembrane proteins 14C [Source:EMBL;Acc:AEE32586.1]
AT3G21780	-2.47984	-1.31024	down	UGT71B6	UDP-glucosyl transferase 71B6 [Source:EMBL;Acc:AEE76551.1]
AT3G62810	1.15824	0.211935	up	AT3G62810	complex 1-LYR domain-containing protein [Source:EMBL;Acc:AEE80396.1]
AT1G64610	1.02161	0.0308437	up	AT1G64610	WD40 domain-containing protein [Source:EMBL;Acc:AEE34261.1]
AT4G26750	1.07989	0.11089	up	AT4G26750	vacuolar protein sorting-associated protein VTA1 [Source:EMBL;Acc:AEE85248.1]
AT1G56510	1.1544	0.207143	up	WRR4	white rust resistance 4 protein [Source:EMBL;Acc:AEE33401.1]
AT5G22100	1.65879	0.730128	up	AT5G22100	RNA 3'-terminal phosphate cyclase-like protein [Source:EMBL;Acc:AED92983.1]
AT4G34588	1.01445	0.0207044	up	CPuORF2	uncharacerized protein [Source:EMBL;Acc:AEE86396.1]
AT4G34590	1.01445	0.0207044	up	GBF6	G-box binding factor 6 [Source:EMBL;Acc:AEE86397.1]
AT3G57090	-1.10712	-0.146814	down	BIGYIN	protein BIGYIN1 [Source:EMBL;Acc:AEE79613.1]
AT5G45110	1.14338	0.193306	up	NPR3	NPR1-like protein 3 [Source:EMBL;Acc:AED95205.1]
AT5G11030	1.1561	0.209264	up	ALF4	Aberrant root formation protein 4 [Source:EMBL;Acc:AED91626.1]
AT3G05230	-1.08864	-0.122522	down	AT3G05230	Signal peptidase complex subunit 3A [Source:EMBL;Acc:AEE74209.1]
AT1G76150	-1.14826	-0.199444	down	ECH2	enoyl-CoA hydratase 2 [Source:EMBL;Acc:AEE35803.1]
AT5G66070	1.08145	0.112967	up	AT5G66070	NEP1-interacting protein-like 1 [Source:EMBL;Acc:AED98155.1]
AT1G74230	-1.02922	-0.0415544	down	GR-RBP5	glycine-rich RNA-binding protein 5 [Source:EMBL;Acc:AEE35568.1]
AT5G51640	-1.05246	-0.0737721	down	YLS7	uncharacterized protein [Source:EMBL;Acc:AED96110.1]
AT3G49530	1.00208	0.00299963	up	ANAC062	NAC domain-containing protein 62 [Source:EMBL;Acc:AEE78553.1]
AT3G63180	1.17565	0.233455	up	TKL	TIC-like protein [Source:EMBL;Acc:AEE80444.1]
AT3G47833	1.15605	0.2092	up	AT3G47833	uncharacterized protein [Source:EMBL;Acc:AEE78336.1]
AT5G62865	1.26836	0.342962	up	AT5G62865	uncharacterized protein [Source:EMBL;Acc:AED97666.1]
AT4G17900	-1.01265	-0.0181395	down	AT4G17900	PLATZ transcription factor family protein [Source:EMBL;Acc:AEE83965.1]
AT3G17910	1.27069	0.345607	up	SURF1	Surfeit locus 1 cytochrome c oxidase biogenesis protein [Source:EMBL;Acc:AEE76023.1]
AT2G24160	-1.01041	-0.0149469	down	AT2G24160	pseudogene.[Source:TAIR;Acc:AT2G24160]
AT3G60820	-1.00494	-0.00711188	down	PBF1	proteasome subunit beta type-1 [Source:EMBL;Acc:AEE80113.1]
AT5G11970	-1.03761	-0.0532637	down	AT5G11970	uncharacterized protein [Source:EMBL;Acc:AED91746.1]
AT3G15580	-1.23752	-0.307455	down	ATG8I	autophagy-related protein 8i [Source:EMBL;Acc:AEE75695.1]
AT4G22670	1.00228	0.0032889	up	AtHip1	HSP70-interacting protein 1 [Source:EMBL;Acc:AEE84638.1]
AT1G18390	1.0076	0.0109184	up	AT1G18390	protein kinase domain-containing protein [Source:EMBL;Acc:AEE29710.1]
AT4G19420	-1.13899	-0.187754	down	AT4G19420	putative Pectinacetylesterase [Source:EMBL;Acc:AEE84179.1]
AT3G04820	-1.03456	-0.0490236	down	AT3G04820	pseudouridine synthase [Source:EMBL;Acc:AEE74140.1]
AT5G61070	-2.02982	-1.02135	down	HDA18	histone deacetylase 18 [Source:EMBL;Acc:AED97419.1]
AT5G51510	1.04308	0.0608543	up	AT5G51510	uncharacterized protein [Source:EMBL;Acc:AED96092.1]
AT3G02770	-1.01569	-0.0224616	down	AT3G02770	Regulator of ribonuclease-like protein 1 [Source:EMBL;Acc:AEE73858.1]
AT5G60040	1.70582	0.770461	up	NRPC1	nuclear RNA polymerase C1 [Source:EMBL;Acc:AED97269.1]
AT3G18410	1.03796	0.0537504	up	AT3G18410	NADH dehydrogenase (ubiquinone) 1 beta subcomplex 10 [Source:EMBL;Acc:AEE76094.1]
AT4G35260	-1.02436	-0.0347182	down	IDH1	Isocitrate dehydrogenase [NAD] regulatory subunit 1 [Source:EMBL;Acc:AEE86486.1]
AT4G21105	-1.03682	-0.052166	down	AT4G21105	Acytochrome-c oxidase/ electron carrier [Source:EMBL;Acc:AEE84402.1]
AT5G33290	-1.51045	-0.594982	down	XGD1	xylogalacturonan beta-1,3-xylosyltransferase [Source:EMBL;Acc:AED93892.1]
AT5G15640	-1.12152	-0.165458	down	AT5G15640	Mitochondrial substrate carrier family protein [Source:EMBL;Acc:AED92187.1]
AT2G17230	1.25412	0.32667	up	EXL5	protein exordium like 5 [Source:EMBL;Acc:AEC06601.1]
AT1G21000	1.24559	0.316831	up	AT1G21000	PLATZ transcription factor domain-containing protein [Source:EMBL;Acc:AEE30053.1]
AT5G61910	-1.10412	-0.142897	down	AT5G61910	DCD (Development and Cell Death) domain-containing protein [Source:EMBL;Acc:AED97531.1]
AT4G16265	-1.06927	-0.0966198	down	NRPB9B	RNA polymerases M/15 Kd subunit [Source:EMBL;Acc:AEE83723.1]
AT2G33490	-1.03837	-0.0543159	down	AT2G33490	hydroxyproline-rich glycoprotein-like protein [Source:EMBL;Acc:AEC08842.1]
AT3G59810	-1.19788	-0.260485	down	AT3G59810	U6 snRNA-associated Sm-like protein LSm6 [Source:EMBL;Acc:AEE79971.1]
AT1G48170	1.05209	0.0732638	up	AT1G48170	uncharacterized protein [Source:EMBL;Acc:AEE32258.1]
AT5G17060	1.00044	0.000635788	up	ATARFB1B	ADP-ribosylation factor B1B [Source:EMBL;Acc:AED92378.1]
AT5G67600	-1.11617	-0.158555	down	AT5G67600	uncharacterized protein [Source:EMBL;Acc:AED98365.1]
AT2G46390	1.0689	0.0961221	up	AT2G46390	uncharacterized protein [Source:EMBL;Acc:AEC10689.1]
AT2G05710	1.08177	0.1134	up	ACO3	aconitate hydratase 2 [Source:EMBL;Acc:AEC05964.1]
AT1G52590	1.05571	0.078214	up	AT1G52590	Putative thiol-disulfide oxidoreductase DCC [Source:EMBL;Acc:AEE32827.1]
AT5G23405	1.21315	0.278755	up	AT5G23405	HMG-box (high mobility group) DNA-binding protein [Source:EMBL;Acc:AED93161.1]
AT4G28570	1.13446	0.182	up	AT4G28570	Long-chain-alcohol oxidase FAO4B [Source:EMBL;Acc:AEE85508.1]
AT3G09810	1.22731	0.2955	up	IDH-VI	Isocitrate dehydrogenase [NAD] catalytic subunit 6 [Source:EMBL;Acc:AEE74815.1]
AT1G56450	-1.01173	-0.016819	down	PBG1	proteasome subunit beta type-4 [Source:EMBL;Acc:AEE33397.1]
AT4G33780	-1.03226	-0.0458005	down	AT4G33780	uncharacterized protein [Source:EMBL;Acc:AEE86277.1]
AT1G70000	1.36994	0.454108	up	AT1G70000	myb-like transcription factor-like protein [Source:EMBL;Acc:AEE35008.1]
AT4G10110	-1.32694	-0.408108	down	AT4G10110	RNA recognition motif-containing protein [Source:EMBL;Acc:AEE82841.1]
AT2G20820	1.03173	0.0450605	up	AT2G20820	uncharacterized protein [Source:EMBL;Acc:AEC07079.1]
AT2G46420	-1.00433	-0.00623193	down	AT2G46420	uncharacterized protein [Source:EMBL;Acc:AEC10693.1]
AT2G01720	-1.14948	-0.200986	down	AT2G01720	Ribophorin I [Source:EMBL;Acc:AEC05488.1]
AT2G26190	1.05838	0.0818608	up	AT2G26190	calmodulin-binding-like protein [Source:EMBL;Acc:AEC07806.1]
AT3G55880	-1.20893	-0.273726	down	AT3G55880	Alpha/beta hydrolase related protein [Source:EMBL;Acc:AEE79453.1]
AT3G28950	-1.08658	-0.119792	down	AT3G28950	AIG2-like protein [Source:EMBL;Acc:AEE77512.1]
AT2G38470	1.10065	0.138358	up	WRKY33	putative WRKY transcription factor 33 [Source:EMBL;Acc:AEC09541.1]
AT1G17330	1.06143	0.0860081	up	AT1G17330	Metal-dependent phosphohydrolase [Source:EMBL;Acc:AEE29573.1]
AT3G10640	1.12718	0.172721	up	VPS60.1	charged multivesicular body protein 5 [Source:EMBL;Acc:AEE74938.1]
AT1G22510	-1.22666	-0.294741	down	AT1G22510	C3HC4-type RING finger protein [Source:EMBL;Acc:AEE30250.1]
AT5G16880	-1.02592	-0.036912	down	AT5G16880	Target of Myb protein 1 [Source:EMBL;Acc:AED92352.1]
AT2G40095	-1.11857	-0.161657	down	AT2G40095	Alpha/beta hydrolase related protein [Source:EMBL;Acc:AEC09777.1]
AT2G40600	-1.53557	-0.618774	down	AT2G40600	appr-1-p processing enzyme family protein [Source:EMBL;Acc:AEC09853.1]
AT3G59660	1.02286	0.0326029	up	AT3G59660	C2 domain and GRAM domain-containing protein [Source:EMBL;Acc:AEE79952.1]
AT5G66910	-1.04119	-0.0582342	down	AT5G66910	CC-NBS-LRR class disease resistance protein [Source:EMBL;Acc:AED98277.1]
AT1G61790	-1.04896	-0.068964	down	AT1G61790	OST3 and OST6 domain-containing protein [Source:EMBL;Acc:AEE33886.1]
AT3G43520	-1.02611	-0.0371806	down	AT3G43520	transmembrane protein 14C [Source:EMBL;Acc:AEE77802.1]
AT4G21380	-1.28352	-0.360102	down	ARK3	receptor kinase 3 [Source:EMBL;Acc:AEE84446.1]
AT3G20600	-1.33466	-0.416474	down	NDR1	late embryogenesis abundant hydroxyproline-rich glycoprotein [Source:EMBL;Acc:AEE76402.1]
AT4G01920	-1.23303	-0.302205	down	AT4G01920	cysteine/histidine-rich C1 domain-containing protein [Source:EMBL;Acc:AEE82099.1]
AT5G62740	-1.02976	-0.0423028	down	HIR1	Hypersensitive-induced response protein 1 [Source:EMBL;Acc:AED97649.1]
AT1G71100	1.21456	0.280436	up	RSW10	ribose 5-phosphate isomerase A [Source:EMBL;Acc:AEE35161.1]
AT1G25580	-1.06848	-0.0955543	down	ANAC008	NAC domain-containing protein 8 [Source:EMBL;Acc:AEE30644.1]
AT1G52420	1.02745	0.0390615	up	AT1G52420	UDP-glycosyltransferase-like protein [Source:EMBL;Acc:AEE32805.1]
AT5G39040	1.1273	0.172865	up	ALS1	ABC transporter B family member 27 [Source:EMBL;Acc:AED94390.1]
AT4G17090	2.13066	1.0913	up	BMY8	beta-amylase 3 [Source:EMBL;Acc:AEE83848.1]
AT4G35750	-1.25388	-0.326404	down	AT4G35750	SEC14 cytosolic factor family protein / phosphoglyceride transfer family protein [Source:EMBL;Acc:AEE86558.1]
AT5G45500	-1.03236	-0.0459455	down	AT5G45500	RNI-like superfamily protein [Source:EMBL;Acc:AED95261.1]
AT3G45040	-1.32199	-0.402714	down	AT3G45040	dolichol kinase [Source:EMBL;Acc:AEE77982.1]
AT2G41835	-1.01053	-0.0151084	down	AT2G41835	zinc finger AN1 and C2H2 domain-containing stress-associated protein 11 [Source:EMBL;Acc:AEC10038.1]
AT1G78922	-1.39001	-0.475091	down	AT1G78922	uncharacterized protein [Source:EMBL;Acc:AEE36179.1]
AT1G53750	1.0829	0.114903	up	RPT1A	regulatory particle triple-A 1A [Source:EMBL;Acc:AEE32992.1]
AT5G23540	1.00665	0.00956504	up	AT5G23540	26S proteasome non-ATPase regulatory subunit 14 [Source:EMBL;Acc:AED93182.1]
AT1G14170	-1.06222	-0.0870849	down	AT1G14170	RNA-binding KH domain-containing protein [Source:EMBL;Acc:AEE29116.1]
AT2G40270	-1.15355	-0.206082	down	AT2G40270	Protein kinase family protein [Source:EMBL;Acc:AEC09805.1]
AT5G24980	-1.15661	-0.2099	down	AT5G24980	uncharacterized protein [Source:EMBL;Acc:AED93385.1]
AT3G51870	1.08882	0.122759	up	AT3G51870	putative envelope ADP,ATP carrier protein [Source:EMBL;Acc:AEE78854.1]
AT1G77370	-1.01547	-0.0221475	down	AT1G77370	glutaredoxin-C3 [Source:EMBL;Acc:AEE35970.1]
AT3G11270	1.50126	0.586173	up	MEE34	26S proteasome regulatory subunit N8 [Source:EMBL;Acc:AEE75023.1]
AT2G17790	-1.05302	-0.0745382	down	VPS35A	protein VPS35A [Source:EMBL;Acc:AEC06688.1]
AT3G09840	1.14223	0.19185	up	ATCDC48	cell division control protein 48-A [Source:EMBL;Acc:AEE74820.1]
AT1G45332	1.27956	0.355644	up	AT1G45332	Elongation factor G [Source:EMBL;Acc:AEE32115.1]
AT1G52200	-4.35782	-2.12361	down	AT1G52200	PLAC8 family protein [Source:EMBL;Acc:AEE32768.1]
AT5G27030	1.59199	0.67083	up	TPR3	Topless-related protein 3 [Source:EMBL;Acc:AED93643.1]
AT1G64970	1.2001	0.263149	up	VTE4	tocopherol O-methyltransferase [Source:EMBL;Acc:AEE34310.1]
AT4G01750	-2.30932	-1.20747	down	RGXT2	rhamnogalacturonan xylosyltransferase 2 [Source:EMBL;Acc:AEE82073.1]
AT5G03905	1.08837	0.122166	up	AT5G03905	Iron-sulfur assembly protein IscA-like 2 [Source:EMBL;Acc:AED90670.1]
AT3G13940	1.07855	0.109098	up	AT3G13940	DNA binding / DNA-directed RNA polymerase [Source:EMBL;Acc:AEE75443.1]
AT1G56540	1.61125	0.68818	up	AT1G56540	TIR-NBS-LRR class disease resistance protein [Source:EMBL;Acc:AEE33405.1]
AT1G48570	1.55558	0.637452	up	AT1G48570	zinc finger (Ran-binding) domain-containing protein [Source:EMBL;Acc:AEE32317.1]
AT2G38290	-1.39541	-0.480693	down	AMT2;1	ammonium transporter 2 [Source:EMBL;Acc:AEC09518.1]
AT3G53670	-1.22437	-0.292041	down	AT3G53670	uncharacterized protein [Source:EMBL;Acc:AEE79125.1]
AT3G13437	-1.72395	-0.785715	down	AT3G13437	uncharacterized protein [Source:EMBL;Acc:AEE75353.1]
AT5G45550	-1.04981	-0.0701265	down	AT5G45550	maintenance of ploidy protein MOB1 (MPS1 binder 1) [Source:EMBL;Acc:AED95267.1]
AT1G29965	1.54185	0.624659	up	AT1G29965	Ribosomal protein L18ae/LX family protein [Source:EMBL;Acc:AEE31159.1]
AT3G56950	1.05732	0.080417	up	SIP2	putative aquaporin SIP2-1 [Source:EMBL;Acc:AEE79591.1]
AT5G53550	-1.28104	-0.357313	down	ATYSL3	metal-nicotianamine transporter YSL3 [Source:EMBL;Acc:AED96376.1]
AT4G00860	1.00889	0.0127656	up	ATOZI1	uncharacterized protein [Source:EMBL;Acc:AEE81946.1]
AT5G38895	1.07872	0.109316	up	AT5G38895	RING/U-box domain-containing protein [Source:EMBL;Acc:AED94370.1]
AT5G55930	-2.07842	-1.05548	down	ATOPT1	oligopeptide transporter 1 [Source:EMBL;Acc:AED96700.1]
AT2G20780	1.11676	0.159321	up	AT2G20780	putative polyol transporter 4 [Source:EMBL;Acc:AEC07069.1]
AT2G41090	-1.65716	-0.728714	down	AT2G41090	calmodulin-like protein 10 [Source:EMBL;Acc:AEC09927.1]
AT4G27100	1.0714	0.0994959	up	AT4G27100	RabGAP/TBC domain-containing protein [Source:EMBL;Acc:AEE85300.1]
AT2G44660	-1.10765	-0.147505	down	AT2G44660	alpha-1,3-glucosyltransferase [Source:EMBL;Acc:AEC10452.1]
AT2G02350	-1.39381	-0.479037	down	SKIP3	SKP1 interacting partner 3 [Source:EMBL;Acc:AEC05568.1]
AT4G35230	1.15438	0.207118	up	BSK1	BR-signaling kinase 1 [Source:EMBL;Acc:AEE86482.1]
AT5G17380	1.06197	0.0867367	up	AT5G17380	2-hydroxyacyl-CoA lyase [Source:EMBL;Acc:AED92419.1]
AT4G23650	1.08201	0.113709	up	CDPK6	calcium-dependent protein kinase 6 [Source:EMBL;Acc:AEE84789.1]
AT5G20280	1.25231	0.324587	up	SPS1F	sucrose phosphate synthase 1F [Source:EMBL;Acc:AED92824.1]
AT2G43320	1.05063	0.0712598	up	AT2G43320	S-adenosyl-L-methionine-dependent methyltransferase-like protein [Source:EMBL;Acc:AEC10251.1]
AT2G17220	1.09518	0.131167	up	AT2G17220	protein kinase domain-containing protein [Source:EMBL;Acc:AEC06599.1]
AT5G22290	1.41876	0.504627	up	anac089	NAC domain containing protein 89 [Source:EMBL;Acc:AED93007.1]
AT4G04745	-1.34127	-0.4236	down	AT4G04745	uncharacterized protein [Source:EMBL;Acc:AEE82420.1]
AT2G07811	1.32068	0.401282	up	AT2G07811	pseudogene.[Source:TAIR;Acc:AT2G07811]
AT1G66240	-1.03349	-0.0475203	down	ATATX1	homolog of anti-oxidant 1 [Source:EMBL;Acc:AEE34483.1]
AT5G03330	1.01851	0.0264645	up	AT5G03330	OTU-like cysteine protease family protein [Source:EMBL;Acc:AED90586.1]
AT5G06530	1.25266	0.324992	up	AT5G06530	ABC transporter G family member 22 [Source:EMBL;Acc:AED91031.1]
AT2G20585	1.55724	0.638993	up	NFD6	nuclear fusion defective 6 [Source:EMBL;Acc:AEC07035.1]
AT1G12990	1.22703	0.295175	up	AT1G12990	beta-1,4-mannosyl-glycoprotein [Source:EMBL;Acc:AEE28957.1]
AT4G33910	1.31184	0.391595	up	AT4G33910	oxidoreductase, 2OG-Fe(II) oxygenase family protein [Source:EMBL;Acc:AEE86292.1]
AT5G27430	1.07065	0.0984907	up	AT5G27430	Signal peptidase complex subunit 3B [Source:EMBL;Acc:AED93686.1]
AT2G20420	1.14627	0.196943	up	AT2G20420	Succinyl-CoA ligase [GDP-forming] subunit beta [Source:EMBL;Acc:AEC07005.1]
AT4G02880	1.15267	0.204982	up	AT4G02880	uncharacterized protein [Source:EMBL;Acc:AEE82242.1]
AT1G54250	1.1985	0.261233	up	ATRPABC16.5	RNA polymerase Rpb8 [Source:EMBL;Acc:AEE33071.1]
AT1G80290	1.08161	0.113181	up	AT1G80290	nucleotide-diphospho-sugar transferase [Source:EMBL;Acc:AEE36383.1]
AT3G51980	-1.01911	-0.0273123	down	AT3G51980	nucleotide exchange factor SIL1 [Source:EMBL;Acc:AEE78871.1]
AT5G12190	-1.13871	-0.187401	down	AT5G12190	pre-mRNA branch site protein p14 [Source:EMBL;Acc:AED91772.1]
AT3G61960	1.04127	0.0583417	up	AT3G61960	protein kinase family protein [Source:EMBL;Acc:AEE80285.1]
AT5G56180	-1.16059	-0.214853	down	ATARP8	actin-related protein 8 [Source:EMBL;Acc:AED96731.1]
AT2G44065	1.19519	0.257241	up	AT2G44065	ribosomal protein L2-like protein [Source:EMBL;Acc:AEC10369.1]
AT2G07715	1.16416	0.219291	up	AT2G07715	60S ribosomal protein L2 [Source:EMBL;Acc:AEC06100.1]
AT4G23850	-1.10612	-0.145507	down	LACS4	long chain acyl-CoA synthetase 4 [Source:EMBL;Acc:AEE84812.1]
AT1G61580	1.40922	0.494899	up	ARP2	60S ribosomal protein L3-2 [Source:EMBL;Acc:AEE33859.1]
AT5G52070	1.66817	0.738265	up	AT5G52070	Agenet domain-containing protein [Source:EMBL;Acc:AED96168.1]
AT4G13810	1.1117	0.152763	up	AtRLP47	receptor like protein 47 [Source:EMBL;Acc:AEE83327.1]
AT2G33120	-1.15783	-0.211426	down	ATVAMP722	vesicle-associated membrane protein 722 [Source:EMBL;Acc:AEC08789.1]
AT5G56260	-1.07094	-0.0988766	down	AT5G56260	Regulator of ribonuclease-like protein 3 [Source:EMBL;Acc:AED96742.1]
AT5G04895	1.84328	0.882271	up	AT5G04895	DEA(D/H)-box RNA helicase family protein [Source:EMBL;Acc:AED90801.1]
AT1G71880	-1.48576	-0.571202	down	SUC1	sucrose transport protein SUC1 [Source:EMBL;Acc:AEE35247.1]
AT2G17440	1.11573	0.157989	up	PIRL5	ras group-related LRR 5 protein [Source:EMBL;Acc:AEC06625.1]
AT5G40580	1.10456	0.143471	up	PBB2	proteasome subunit beta type-7-B [Source:EMBL;Acc:AED94568.1]
AT1G78510	1.25061	0.322631	up	SPS1	solanesyl diphosphate synthase 1 [Source:EMBL;Acc:AEE36115.1]
AT1G04850	1.15991	0.214011	up	AT1G04850	ubiquitin-associated (UBA)/TS-N domain-containing protein [Source:EMBL;Acc:AEE27751.1]
AT1G53530	-1.01838	-0.0262778	down	AT1G53530	peptidase-S24/S26 domain-containing protein [Source:EMBL;Acc:AEE32953.1]
AT4G14430	-1.09684	-0.133353	down	ECHIB	indole-3-butyric acid response 10 [Source:EMBL;Acc:AEE83444.1]
AT5G56090	1.43337	0.519413	up	COX15	cytochrome c oxidase subunit XV assembly protein [Source:EMBL;Acc:AED96720.1]
AT2G31740	1.08949	0.123654	up	AT2G31740	S-adenosylmethionine-dependent methyltransferase domain-containing protein [Source:EMBL;Acc:AEC08579.1]
AT1G50040	-1.0044	-0.00633431	down	AT1G50040	uncharacterized protein [Source:EMBL;Acc:AEE32511.1]
AT4G38630	1.05845	0.0819515	up	MCB1	26S proteasome non-ATPase regulatory subunit 4 [Source:EMBL;Acc:AEE86956.1]
AT1G71840	1.09445	0.130207	up	AT1G71840	transducin/WD-40 repeat-containing protein [Source:EMBL;Acc:AEE35239.1]
AT1G18720	-1.00364	-0.00523885	down	AT1G18720	uncharacterized protein [Source:EMBL;Acc:AEE29752.1]
AT3G22370	1.28964	0.366974	up	AOX1A	alternative oxidase 1A [Source:EMBL;Acc:AEE76627.1]
AT5G20000	1.31918	0.399647	up	AT5G20000	AAA-type ATPase family protein [Source:EMBL;Acc:AED92778.1]
AT5G47320	-1.08168	-0.11328	down	RPS19	small subunit ribosomal protein S19 [Source:EMBL;Acc:AED95498.1]
AT2G22780	-1.02092	-0.0298634	down	PMDH1	malate dehydrogenase [Source:EMBL;Acc:AEC07353.1]
AT3G22630	1.05378	0.0755733	up	PBD1	proteasome subunit beta type-2-A [Source:EMBL;Acc:AEE76659.1]
AT3G26600	-1.11579	-0.158071	down	ARO4	armadillo repeat only 4 protein [Source:EMBL;Acc:AEE77184.1]
AT5G65210	-1.10333	-0.141861	down	TGA1	transcription factor TGA1 [Source:EMBL;Acc:AED98024.1]
AT4G35600	1.24582	0.3171	up	CONNEXIN 32	putative serine/threonine-protein kinase Cx32 [Source:EMBL;Acc:AEE86538.1]
AT2G46440	-1.22705	-0.295189	down	ATCNGC11	cyclic nucleotide-gated ion channel 11 [Source:EMBL;Acc:AEC10696.1]
AT3G15260	-1.11443	-0.156303	down	AT3G15260	putative protein phosphatase 2C 39 [Source:EMBL;Acc:AEE75638.1]
AT5G07960	1.05554	0.0779854	up	AT5G07960	uncharacterized protein [Source:EMBL;Acc:AED91229.1]
AT1G70810	-1.25725	-0.330269	down	AT1G70810	calcium-dependent lipid-binding domain [Source:EMBL;Acc:AEE35119.1]
AT4G21570	1.00725	0.0104278	up	AT4G21570	uncharacterized protein [Source:EMBL;Acc:AEE84472.1]
AT5G04830	1.0289	0.0411081	up	AT5G04830	Nuclear transport factor 2 (NTF2) family protein [Source:EMBL;Acc:AED90792.1]
AT1G31130	-1.12669	-0.172094	down	AT1G31130	uncharacterized protein [Source:EMBL;Acc:AEE31315.1]
AT3G07370	-1.175	-0.232662	down	ATCHIP	E3 ubiquitin-protein ligase CHIP [Source:EMBL;Acc:AEE74535.1]
AT2G45010	-1.42502	-0.51098	down	AT2G45010	PLAC8 family protein [Source:EMBL;Acc:AEC10497.1]
AT2G04900	-1.26341	-0.337324	down	AT2G04900	uncharacterized protein [Source:EMBL;Acc:AEC05884.1]
AT4G03960	-1.5478	-0.630218	down	AT4G03960	tyrosine specific protein phosphatase family protein [Source:EMBL;Acc:AEE82361.1]
AT2G24180	-1.09439	-0.130123	down	CYP71B6	cytochrome P450 71B6 [Source:EMBL;Acc:AEC07536.1]
AT1G11890	-1.15768	-0.21124	down	SEC22	vesicle transport protein SEC22 [Source:EMBL;Acc:AEE28809.1]
AT3G44400	-1.3846	-0.469467	down	AT3G44400	TIR-NBS-LRR class disease resistance protein [Source:EMBL;Acc:AEE77900.1]
AT5G11060	1.20751	0.272033	up	KNAT4	homeobox protein knotted-1-like 4 [Source:EMBL;Acc:AED91630.1]
AT1G20450	1.43947	0.525534	up	ERD10	dehydrin ERD10 [Source:EMBL;Acc:AEE29974.1]
AT5G66130	1.16398	0.219061	up	ATRAD17	cell cycle checkpoint protein RAD17 [Source:EMBL;Acc:AED98163.1]
AT4G15955	-1.41731	-0.503159	down	AT4G15955	epoxide hydrolase-related protein [Source:EMBL;Acc:AEE83672.1]
AT3G44480	1.09472	0.130566	up	cog1	TIR-NBS-LRR class disease resistance protein [Source:EMBL;Acc:AEE77906.1]
AT3G01590	1.09504	0.130983	up	AT3G01590	glucose-6-phosphate 1-epimerase [Source:EMBL;Acc:AEE73693.1]
AT4G27500	1.07039	0.0981369	up	PPI1	proton pump interactor 1 [Source:EMBL;Acc:AEE85350.1]
AT2G23890	1.38694	0.471905	up	AT2G23890	HAD-superfamily hydrolase, subfamily IG, 5'-nucleotidase [Source:EMBL;Acc:AEC07499.1]
AT4G02405	-1.10227	-0.140478	down	AT4G02405	leucine carboxyl methyltransferase domain-containing protein [Source:EMBL;Acc:AEE82166.1]
AT5G08680	1.03297	0.0468032	up	AT5G08680	ATP synthase subunit beta-3 [Source:EMBL;Acc:AED91337.1]
AT1G53110	-1.10273	-0.141082	down	AT1G53110	putative proton pump interactor protein [Source:EMBL;Acc:AEE32892.1]
AT3G27280	1.3528	0.435943	up	ATPHB4	prohibitin 4 [Source:EMBL;Acc:AEE77288.1]
AT5G07710	-1.23495	-0.304456	down	AT5G07710	exonuclease family protein [Source:EMBL;Acc:AED91196.1]
AT2G39360	1.09768	0.134461	up	AT2G39360	putative receptor-like protein kinase [Source:EMBL;Acc:AEC09665.1]
AT1G29040	-1.23201	-0.301015	down	AT1G29040	uncharacterized protein [Source:EMBL;Acc:AEE31034.1]
AT5G58220	-1.31771	-0.398038	down	TTL	uric acid degradation bifunctional protein TTL [Source:EMBL;Acc:AED97018.1]
AT3G22845	-1.06524	-0.0911802	down	AT3G22845	emp24/gp25L/p24 family/GOLD domain-containing protein [Source:EMBL;Acc:AEE76683.1]
AT5G19750	-1.31473	-0.39477	down	AT5G19750	protein Mpv17 [Source:EMBL;Acc:AED92745.1]
AT3G50950	-1.05342	-0.0750761	down	ZAR1	disease resistance RPP13-like protein 4 [Source:EMBL;Acc:AEE78731.1]
AT1G54320	-1.01964	-0.0280657	down	AT1G54320	ALA-interacting subunit 3 [Source:EMBL;Acc:AEE33080.1]
AT5G15730	-1.29095	-0.368434	down	CRLK2	putative serine/threonine protein kinase [Source:EMBL;Acc:AED92198.1]
AT5G08335	1.15893	0.212799	up	ATSTE14B	protein-S-isoprenylcysteine O-methyltransferase B [Source:EMBL;Acc:AED91285.1]
AT2G40240	1.30146	0.380127	up	AT2G40240	pentatricopeptide repeat-containing protein [Source:EMBL;Acc:AEC09801.1]
AT2G34260	1.75827	0.814154	up	AT2G34260	transducin/WD-40 repeat-containing protein [Source:EMBL;Acc:AEC08946.1]
AT3G12800	1.02461	0.0350682	up	SDRB	peroxisomal 2,4-dienoyl-CoA reductase [Source:EMBL;Acc:AEE75247.1]
AT1G03340	-1.24253	-0.313276	down	AT1G03340	uncharacterized protein [Source:EMBL;Acc:AEE27561.1]
AT3G07480	-1.00602	-0.00866573	down	AT3G07480	2Fe-2S ferredoxin-like protein [Source:EMBL;Acc:AEE74548.1]
AT5G51070	1.21839	0.284977	up	ERD1	ERD1 protein [Source:EMBL;Acc:AED96029.1]
AT3G30775	1.07999	0.111014	up	ATPOX	proline dehydrogenase 1 [Source:EMBL;Acc:AEE77659.1]
AT1G18210	-1.25812	-0.331273	down	AT1G18210	putative calcium-binding protein CML27 [Source:EMBL;Acc:AEE29688.1]
AT3G20500	1.0883	0.122075	up	ATPAP18	purple acid phosphatase 18 [Source:EMBL;Acc:AEE76388.1]
AT5G47560	1.25209	0.324338	up	ATSDAT	tonoplast dicarboxylate transporter [Source:EMBL;Acc:AED95532.1]
AT4G11260	1.01444	0.0206874	up	EDM1	phosphatase SGT1b [Source:EMBL;Acc:AEE82990.1]
AT1G54150	-1.16107	-0.215457	down	AT1G54150	E3 ubiquitin ligase-like protein [Source:EMBL;Acc:AEE33055.1]
AT2G01350	1.15185	0.203958	up	QPT	quinolinate phoshoribosyltransferase [Source:EMBL;Acc:AEC05439.1]
AT2G27200	-1.1267	-0.172106	down	AT2G27200	P-loop containing nucleoside triphosphate hydrolase-like protein [Source:EMBL;Acc:AEC07952.1]
AT1G25520	-1.15438	-0.207124	down	AT1G25520	putative transmembrane protein [Source:EMBL;Acc:AEE30637.1]
AT3G17810	-1.07376	-0.102673	down	PYD1	pyrimidine 1 [Source:EMBL;Acc:AEE76010.1]
AT1G09830	1.2448	0.315916	up	AT1G09830	phosphoribosylamine--glycine ligase [Source:EMBL;Acc:AEE28500.1]
AT1G76185	1.30007	0.37859	up	AT1G76185	uncharacterized protein [Source:EMBL;Acc:AEE35808.1]
AT4G39740	1.43582	0.521879	up	AT4G39740	electron transport SCO1/SenC family protein [Source:EMBL;Acc:AEE87111.1]
AT3G53668	-1.25184	-0.324051	down	CPuORF51	conserved peptide upstream open reading frame 51 [Source:EMBL;Acc:AEE79126.1]
AT1G53645	1.28087	0.357121	up	AT1G53645	hydroxyproline-rich glycoprotein-like protein [Source:EMBL;Acc:AEE32975.1]
AT1G10050	1.18324	0.242744	up	AT1G10050	glycosyl hydrolase and carbohydrate-binding domain-containing protein [Source:EMBL;Acc:AEE28533.1]
AT3G02190	-1.2942	-0.372063	down	AT3G02190	60S ribosomal protein L39-2 [Source:EMBL;Acc:AEE73776.1]
AT3G08590	1.04697	0.0662197	up	AT3G08590	Phosphoglycerate mutase, 2,3-bisphosphoglycerate-independent [Source:EMBL;Acc:AEE74651.1]
AT5G18490	1.02403	0.0342515	up	AT5G18490	uncharacterized protein [Source:EMBL;Acc:AED92570.1]
AT3G29170	1.05255	0.0738936	up	AT3G29170	uncharacterized protein [Source:EMBL;Acc:AEE77545.1]
AT3G01130	-1.1004	-0.138032	down	AT3G01130	uncharacterized protein [Source:EMBL;Acc:AEE73614.1]
AT1G32340	1.14986	0.201462	up	NHL8	ubiquitin-protein ligase RNF14 [Source:EMBL;Acc:AEE31466.1]
AT5G49900	1.82947	0.871426	up	AT5G49900	Beta-glucosidase, GBA2 type family protein [Source:EMBL;Acc:AED95869.1]
AT4G02390	1.80073	0.84858	up	ATPARP1	Poly [ADP-ribose] polymerase 2 [Source:EMBL;Acc:AEE82163.1]
AT1G02170	-1.09256	-0.127707	down	MCP1B	metacaspase 1 [Source:EMBL;Acc:AEE27396.1]
AT1G62730	-1.31899	-0.399439	down	AT1G62730	isoprenoid biosynthesis enzyme domain-containing protein [Source:EMBL;Acc:AEE33998.1]
AT2G18730	1.11339	0.154959	up	ATDGK3	diacylglycerol kinase 3 [Source:EMBL;Acc:AEC06799.1]
AT3G23280	-1.26615	-0.340453	down	XBAT35	putative E3 ubiquitin-protein ligase XBAT35 [Source:EMBL;Acc:AEE76747.1]
AT5G18900	1.35231	0.435421	up	AT5G18900	oxidoreductase, 2OG-Fe(II) oxygenase family protein [Source:EMBL;Acc:AED92626.1]
AT3G02360	1.15984	0.213921	up	AT3G02360	6-phosphogluconate dehydrogenase [Source:EMBL;Acc:AEE73797.1]
AT2G31870	-1.50187	-0.586757	down	TEJ	Poly(ADP-ribose) glycohydrolase 1 [Source:EMBL;Acc:AEC08597.1]
AT1G51070	1.24975	0.321645	up	bHLH115	transcription factor bHLH115 [Source:EMBL;Acc:AEE32618.1]
AT3G06860	-1.01857	-0.0265449	down	MFP2	enoyl-CoA hydratase/3-hydroxyacyl-CoA dehydrogenase [Source:EMBL;Acc:AEE74468.1]
AT1G78380	-1.06424	-0.0898228	down	GSTU19	glutathione S-transferase TAU 19 [Source:EMBL;Acc:AEE36099.1]
AT2G44350	-1.06504	-0.0909122	down	CSY4	citrate synthase 4 [Source:EMBL;Acc:AEC10410.1]
AT5G02590	-1.0454	-0.0640513	down	AT5G02590	tetratricopeptide repeat domain-containing protein [Source:EMBL;Acc:AED90494.1]
AT5G20500	-1.20507	-0.26912	down	AT5G20500	glutaredoxin-C4 [Source:EMBL;Acc:AED92853.1]
AT3G45640	-1.34846	-0.431311	down	ATMPK3	extracellular signal-regulated kinase 1/2 [Source:EMBL;Acc:AEE78054.1]
AT3G61670	1.27398	0.349345	up	AT3G61670	uncharacterized protein [Source:EMBL;Acc:AEE80238.1]
AT1G74410	-1.2276	-0.295836	down	AT1G74410	NEP1-interacting protein-like 2 [Source:EMBL;Acc:AEE35588.1]
AT4G00955	-1.32157	-0.402256	down	AT4G00955	uncharacterized protein [Source:EMBL;Acc:AEE81960.1]
AT3G54640	-1.17451	-0.232058	down	TSA1	tryptophan synthase alpha chain [Source:EMBL;Acc:AEE79260.1]
AT1G25550	1.4427	0.52877	up	AT1G25550	myb-like transcription factor-like protein [Source:EMBL;Acc:AEE30641.1]
AT5G16510	1.00095	0.0013717	up	AT5G16510	alpha-1,4-glucan-protein synthase family protein [Source:EMBL;Acc:AED92303.1]
AT5G38630	-1.05234	-0.0735963	down	ACYB-1	cytochrome b-561 [Source:EMBL;Acc:AED94343.1]
AT4G28270	-1.23958	-0.309853	down	RMA2	E3 ubiquitin-protein ligase RMA2 [Source:EMBL;Acc:AEE85462.1]
AT1G67120	1.48773	0.573112	up	AT1G67120	AAA ATPase containing von Willebrand factor type A domain-containing protein [Source:EMBL;Acc:AEE34598.1]
AT4G36195	-1.10458	-0.143503	down	AT4G36195	Serine carboxypeptidase S28 family protein [Source:EMBL;Acc:AEE86631.1]
AT4G26240	-1.09702	-0.133584	down	AT4G26240	uncharacterized protein [Source:EMBL;Acc:AEE85174.1]
AT2G33590	1.12305	0.167424	up	AT2G33590	Rossmann-fold NAD(P)-binding domain-containing protein [Source:EMBL;Acc:AEC08857.1]
AT2G40650	1.27169	0.346752	up	AT2G40650	pre-mRNA-splicing factor 38A [Source:EMBL;Acc:AEC09860.1]
AT1G32870	1.50351	0.588332	up	ANAC013	NAC domain protein 13 [Source:EMBL;Acc:AEE31535.1]
AT5G07470	-1.15814	-0.211808	down	ATMSRA3	peptide methionine sulfoxide reductase A3 [Source:EMBL;Acc:AED91162.1]
AT1G30755	1.1578	0.211383	up	AT1G30755	uncharacterized protein [Source:EMBL;Acc:AEE31268.1]
AT5G19690	-1.16815	-0.224222	down	STT3A	dolichyl-diphosphooligosaccharide--protein glycosyltransferase [Source:EMBL;Acc:AED92738.1]
AT2G03680	-1.09186	-0.126787	down	SKU6	spiral1 [Source:EMBL;Acc:AEC05736.1]
AT2G38740	1.19777	0.260354	up	AT2G38740	haloacid dehalogenase-like hydrolase domain-containing protein [Source:EMBL;Acc:AEC09579.1]
AT3G52800	1.41211	0.497857	up	AT3G52800	zinc finger A20 and AN1 domain-containing stress-associated protein 6 [Source:EMBL;Acc:AEE78995.1]
AT1G75510	1.02394	0.0341333	up	AT1G75510	transcription initiation factor TFIIF beta subunit [Source:EMBL;Acc:AEE35728.1]
AT1G69572	1.97202	0.979671	up	AT1G69572	other RNA.[Source:TAIR;Acc:AT1G69572]
AT3G57550	1.1385	0.187134	up	AGK2	guanylate kinase [Source:EMBL;Acc:AEE79670.1]
AT3G18760	1.04582	0.0646321	up	AT3G18760	small subunit ribosomal protein S6 [Source:EMBL;Acc:AEE76142.1]
AT1G22180	1.0997	0.137105	up	AT1G22180	sec.4-like phosphatidylinositol transfer protein [Source:EMBL;Acc:AEE30207.1]
AT2G42790	-1.31469	-0.394727	down	CSY3	citrate synthase 3 [Source:EMBL;Acc:AEC10169.1]
AT3G60800	-1.02056	-0.029357	down	AT3G60800	putative S-acyltransferase [Source:EMBL;Acc:AEE80109.1]
AT2G03450	-1.25269	-0.325035	down	PAP9	putative inactive purple acid phosphatase 9 [Source:EMBL;Acc:AEC05701.1]
AT1G56520	1.17709	0.235228	up	AT1G56520	TIR-NBS-LRR class disease resistance protein [Source:EMBL;Acc:AEE33402.1]
AT1G13210	-1.52812	-0.611761	down	ACA.l	phospholipid-translocating ATPase [Source:EMBL;Acc:AEE28985.1]
AT2G19740	1.00535	0.00769964	up	AT2G19740	60S ribosomal protein L31-1 [Source:EMBL;Acc:AEC06921.1]
AT1G71170	-1.21483	-0.280752	down	AT1G71170	6-phosphogluconate dehydrogenase-like protein [Source:EMBL;Acc:AEE35168.1]
AT2G35240	1.28707	0.364095	up	AT2G35240	putative plastid developmental protein DAG [Source:EMBL;Acc:AEC09085.1]
AT1G64950	1.16148	0.215969	up	CYP89A5	cytochrome P450, family 89, subfamily A, polypeptide 5 [Source:EMBL;Acc:AEE34308.1]
AT1G30420	1.08378	0.116069	up	ATMRP12	ABC transporter C family member 11 [Source:EMBL;Acc:AEE31215.1]
AT5G52890	1.33465	0.41646	up	AT5G52890	AT hook motif-containing protein [Source:EMBL;Acc:AED96274.1]
AT3G26320	-1.15554	-0.208573	down	CYP71B36	cytochrome P450 71B36 [Source:EMBL;Acc:AEE77145.1]
AT2G33730	-1.03887	-0.0550102	down	AT2G33730	DEAD-box ATP-dependent RNA helicase 21 [Source:EMBL;Acc:AEC08875.1]
AT5G19440	-1.17467	-0.232259	down	AT5G19440	Rossmann-fold NAD(P)-binding domain-containing protein [Source:EMBL;Acc:AED92707.1]
AT1G79470	1.4541	0.540124	up	AT1G79470	inosine-5'-monophosphate dehydrogenase [Source:EMBL;Acc:AEE36247.1]
AT5G14030	-1.05228	-0.0735254	down	AT5G14030	translocon-associated protein subunit beta [Source:EMBL;Acc:AED91979.1]
AT4G00570	-1.00641	-0.00921345	down	NAD-ME2	malate dehydrogenase (decarboxylating) [Source:EMBL;Acc:AEE81903.1]
AT3G47090	-1.50128	-0.586198	down	AT3G47090	leucine-rich repeat protein kinase-like protein [Source:EMBL;Acc:AEE78242.1]
AT5G66860	1.21105	0.276254	up	AT5G66860	Ribosomal protein L25/Gln-tRNA synthetase, anti-codon-binding domain protein [Source:EMBL;Acc:AED98272.1]
AT2G16530	-1.5631	-0.644409	down	AT2G16530	putative polyprenol reductase 2 [Source:EMBL;Acc:AEC06507.1]
AT5G19930	-1.09292	-0.128185	down	AT5G19930	uncharacterized protein [Source:EMBL;Acc:AED92768.1]
AT2G47390	-1.12235	-0.166521	down	AT2G47390	prolyl oligopeptidase-like protein [Source:EMBL;Acc:AEC10835.1]
AT1G07990	1.13407	0.181516	up	AT1G07990	SIT4 phosphatase-associated family protein [Source:EMBL;Acc:AEE28224.1]
AT1G52800	-1.86435	-0.89867	down	AT1G52800	oxidoreductase, 2OG-Fe(II) oxygenase family protein [Source:EMBL;Acc:AEE32853.1]
AT2G06530	-1.05337	-0.0750106	down	VPS2.1	vacuolar protein sorting-associated protein 2-1 [Source:EMBL;Acc:AEC06012.1]
AT3G51250	1.12035	0.163949	up	AT3G51250	Senescence/dehydration-associated protein-like protein [Source:EMBL;Acc:AEE78768.1]
AT4G10120	1.70769	0.772044	up	ATSPS4F	sucrose-phosphate synthase [Source:EMBL;Acc:AEE82845.1]
AT3G52730	-1.05011	-0.070535	down	AT3G52730	ubiquinol-cytochrome c reductase subunit 9 [Source:EMBL;Acc:AEE78987.1]
AT4G19960	1.16272	0.217508	up	ATKUP9	K+ uptake permease 9 [Source:EMBL;Acc:AEE84252.1]
AT4G39380	1.05562	0.0780943	up	AT4G39380	uncharacterized protein [Source:EMBL;Acc:AEE87065.1]
AT5G05110	-1.01849	-0.0264304	down	AT5G05110	cysteine proteinase inhibitor 7 [Source:EMBL;Acc:AED90829.1]
AT3G48310	1.11756	0.160356	up	CYP71A22	cytochrome P450 71A22 [Source:EMBL;Acc:AEE78399.1]
AT4G14110	-1.07417	-0.103229	down	FUS7	COP9 signalosome complex subunit 8 [Source:EMBL;Acc:AEE83376.1]
AT1G34130	-1.03394	-0.0481472	down	STT3B	dolichyl-diphosphooligosaccharide--protein glycosyltransferase [Source:EMBL;Acc:AEE31675.1]
AT5G60590	-1.27647	-0.352164	down	AT5G60590	DHBP synthase RibB-like alpha/beta domain-containing protein [Source:EMBL;Acc:AED97351.1]
AT1G09780	-1.06331	-0.0885601	down	AT1G09780	2,3-bisphosphoglycerate-independent phosphoglycerate mutase 1 [Source:EMBL;Acc:AEE28491.1]
AT4G37310	-1.31294	-0.392804	down	CYP81H1	cytochrome P450, family 81, subfamily H, polypeptide 1 [Source:EMBL;Acc:AEE86780.1]
AT5G51040	1.33346	0.415169	up	AT5G51040	uncharacterized protein [Source:EMBL;Acc:AED96025.1]
AT4G27540	1.0012	0.00173408	up	PRA1.H	PRA1-like protein H [Source:EMBL;Acc:AEE85355.1]
AT3G48140	-1.22718	-0.295346	down	AT3G48140	B12D protein [Source:EMBL;Acc:AEE78372.1]
AT5G37510	1.03774	0.0534404	up	EMB1467	NADH-ubiquinone oxidoreductase subunit [Source:EMBL;Acc:AED94199.1]
AT4G05050	-1.02465	-0.0351324	down	UBQ11	ubiquitin 11 [Source:EMBL;Acc:AEE82470.1]
AT3G30180	-1.33408	-0.415845	down	CYP85A2	brassinosteroid-6-oxidase 2 [Source:EMBL;Acc:AEE77620.1]
AT4G16110	-1.02556	-0.0364106	down	ARR2	two-component response regulator ARR2 [Source:EMBL;Acc:AEE83694.1]
AT2G39780	-1.01984	-0.0283451	down	RNS2	Ribonuclease 2 [Source:EMBL;Acc:AEC09724.1]
AT2G33630	-1.1765	-0.234495	down	AT2G33630	Rossmann-fold NAD(P)-binding domain-containing protein [Source:EMBL;Acc:AEC08864.1]
AT5G56630	-1.03017	-0.0428864	down	PFK7	6-phosphofructokinase 7 [Source:EMBL;Acc:AED96790.1]
AT4G01037	1.21608	0.282241	up	WTF1	ubiquitin carboxyl-terminal hydrolase-like protein [Source:EMBL;Acc:AEE81971.1]
AT2G25140	-1.01518	-0.0217412	down	CLPB4	casein lytic proteinase B4 [Source:EMBL;Acc:AEC07662.1]
AT4G31170	-1.08259	-0.114482	down	AT4G31170	protein kinase family protein [Source:EMBL;Acc:AEE85870.1]
AT2G03800	-1.02791	-0.0397126	down	GEK1	D-aminoacyl-tRNA deacylase [Source:EMBL;Acc:AEC05749.1]
AT4G14020	1.21088	0.276059	up	AT4G14020	Rapid alkalinization factor (RALF) family protein [Source:EMBL;Acc:AEE83361.1]
AT2G24360	-1.11173	-0.152808	down	AT2G24360	putative serine/threonine/tyrosine kinase [Source:EMBL;Acc:AEC07566.1]
AT3G53780	1.02515	0.0358413	up	ATRBL4	RHOMBOID-like protein 4 [Source:EMBL;Acc:AEE79142.1]
AT1G75990	1.02694	0.0383466	up	AT1G75990	26S proteasome regulatory subunit N3 [Source:EMBL;Acc:AEE35783.1]
AT1G20200	1.09993	0.137409	up	EMB2719	26S proteasome regulatory subunit N3 [Source:EMBL;Acc:AEE29950.1]
AT5G11000	1.1103	0.150946	up	AT5G11000	uncharacterized protein [Source:EMBL;Acc:AED91619.1]
AT1G05350	1.1815	0.240625	up	AT1G05350	ubiquitin-like modifier-activating enzyme 5 [Source:EMBL;Acc:AEE27828.1]
AT3G12560	1.24706	0.318532	up	ATTBP2	Telomere repeat-binding protein 3 [Source:EMBL;Acc:AEE75213.1]
AT1G80670	1.10684	0.146447	up	AT1G80670	Rae1-like protein [Source:EMBL;Acc:AEE36435.1]
AT3G04090	-1.32718	-0.408359	down	SIP1A	aquaporin SIP1-1 [Source:EMBL;Acc:AEE74036.1]
AT1G06760	-1.22935	-0.297895	down	AT1G06760	histone H1.1 [Source:EMBL;Acc:AEE28032.1]
AT3G53410	-1.12927	-0.175391	down	AT3G53410	RING/U-box domain-containing protein [Source:EMBL;Acc:AEE79082.1]
AT2G01680	1.02614	0.0372238	up	AT2G01680	ankyrin repeats-containing protein [Source:EMBL;Acc:AEC05484.1]
AT5G65750	-1.23529	-0.304847	down	AT5G65750	2-oxoglutarate dehydrogenase, E1 component [Source:EMBL;Acc:AED98101.1]
AT1G44890	1.2348	0.304281	up	AT1G44890	uncharacterized protein [Source:EMBL;Acc:AEE32059.1]
AT2G36530	1.03476	0.0492964	up	LOS2	bifunctional enolase 2/transcriptional activator [Source:EMBL;Acc:AEC09265.1]
AT1G13060	-1.11069	-0.151456	down	PBE1	proteasome subunit beta type-5-A [Source:EMBL;Acc:AEE28965.1]
AT2G04350	1.19058	0.251666	up	LACS8	putative AMP-binding protein [Source:EMBL;Acc:AEC05823.1]
AT3G59500	1.0629	0.0880082	up	AT3G59500	YIF1 integral membrane domain-containing protein [Source:EMBL;Acc:AEE79933.1]
AT5G55070	-1.00952	-0.0136687	down	AT5G55070	dihydrolipoyllysine-residue succinyltransferase component of 2-oxoglutarate dehydrogenase complex 1 [Source:EMBL;Acc:AED96577.1]
AT4G29950	1.13733	0.185652	up	AT4G29950	RabGAP/TBC domain-containing protein [Source:EMBL;Acc:AEE85701.1]
AT4G22920	-1.01719	-0.0245937	down	ATNYE1	non-yellowing protein 1 [Source:EMBL;Acc:AEE84681.1]
AT2G45030	-1.00559	-0.00803725	down	AT2G45030	elongation factor EF-G [Source:EMBL;Acc:AEC10498.1]
AT4G34570	1.02284	0.0325781	up	THY-2	thymidylate synthase [Source:EMBL;Acc:AEE86394.1]
AT5G20010	1.1126	0.153936	up	RAN1	GTP-binding nuclear protein Ran-1 [Source:EMBL;Acc:AED92779.1]
AT1G49350	1.13637	0.184434	up	AT1G49350	pfkB-type carbohydrate kinase-like protein [Source:EMBL;Acc:AEE32421.1]
AT5G26030	1.08068	0.111944	up	FC-I	ferrochelatase 1 [Source:EMBL;Acc:AED93515.1]
AT2G36680	-1.06396	-0.0894423	down	AT2G36680	vacuolar protein-sorting-associated protein 37-2 [Source:EMBL;Acc:AEC09285.1]
AT2G37250	1.23104	0.299878	up	ADK	adenosine kinase [Source:EMBL;Acc:AEC09372.1]
AT3G07640	-1.0207	-0.0295626	down	AT3G07640	uncharacterized protein [Source:EMBL;Acc:AEE74579.1]
AT1G52780	-1.40978	-0.495469	down	AT1G52780	uncharacterized protein [Source:EMBL;Acc:AEE32851.1]
AT2G39795	1.24551	0.316734	up	AT2G39795	glycoprotein-like protein [Source:EMBL;Acc:AEC09727.1]
AT3G09735	-1.09928	-0.136554	down	AT3G09735	DNA-binding protein S1FA3 [Source:EMBL;Acc:AEE74806.1]
AT5G35080	-1.23852	-0.308621	down	AT5G35080	protein OS-9 [Source:EMBL;Acc:AED93928.1]
AT1G48430	-1.10273	-0.141074	down	AT1G48430	Dihydroxyacetone kinase [Source:EMBL;Acc:AEE32291.1]
AT3G55850	-1.11823	-0.161217	down	LAF3	amidohydrolase family protein [Source:EMBL;Acc:AEE79448.1]
AT2G39960	-1.07828	-0.108738	down	AT2G39960	signal peptidase complex subunit 2 [Source:EMBL;Acc:AEC09756.1]
AT5G52870	1.25345	0.325906	up	AT5G52870	uncharacterized protein [Source:EMBL;Acc:AED96270.1]
AT5G63880	-1.01882	-0.026893	down	VPS20.1	vacuolar protein sorting-associated protein 20-1 [Source:EMBL;Acc:AED97809.1]
AT1G72890	1.21611	0.282274	up	AT1G72890	TIR-NBS class of disease resistance protein [Source:EMBL;Acc:AEE35387.1]
AT2G40700	1.45783	0.543818	up	AT2G40700	DEAD-box ATP-dependent RNA helicase 17 [Source:EMBL;Acc:AEC09865.1]
AT1G17100	1.43255	0.518583	up	AT1G17100	SOUL heme-binding protein [Source:EMBL;Acc:AEE29541.1]
AT3G58600	-1.03872	-0.0548105	down	AT3G58600	Adaptin ear-binding coat-associated protein 1 NECAP-1 [Source:EMBL;Acc:AEE79803.1]
AT5G04170	-1.29985	-0.378349	down	AT5G04170	putative calcium-binding protein CML50 [Source:EMBL;Acc:AED90707.1]
AT4G39730	1.17682	0.234889	up	AT4G39730	Lipase/lipooxygenase, PLAT/LH2 family protein [Source:EMBL;Acc:AEE87110.1]
AT5G55850	-1.00526	-0.00756963	down	NOI	RPM1-interacting protein 4 (RIN4) family protein [Source:EMBL;Acc:AED96689.1]
AT2G07180	-1.20833	-0.27301	down	AT2G07180	protein kinase domain-containing protein [Source:EMBL;Acc:AEC06039.1]
AT5G13030	-1.07812	-0.108524	down	AT5G13030	uncharacterized protein [Source:EMBL;Acc:AED91843.1]
AT5G23090	-1.16439	-0.219578	down	NF-YB13	protein Dr1-like protein [Source:EMBL;Acc:AED93119.1]
AT2G23100	1.2894	0.366699	up	AT2G23100	cysteine/histidine-rich C1 domain-containing protein [Source:EMBL;Acc:AEC07410.1]
AT1G03900	1.02873	0.0408662	up	ATNAP4	non-intrinsic ABC protein 4 [Source:EMBL;Acc:AEE27630.1]
AT2G01670	1.11069	0.151455	up	atnudt17	nudix hydrolase 17 [Source:EMBL;Acc:AEC05483.1]
AT1G22410	-1.04299	-0.0607262	down	AT1G22410	class-II DAHP synthetase-like protein [Source:EMBL;Acc:AEE30238.1]
AT5G20730	1.1129	0.154325	up	IAA21	auxin response factor 7 [Source:EMBL;Acc:AED92884.1]
AT4G37910	1.48063	0.566209	up	mtHsc70-1	molecular chaperone DnaK [Source:EMBL;Acc:AEE86852.1]
AT3G16030	1.35006	0.433023	up	CES101	lectin receptor kinase CES101 [Source:EMBL;Acc:AEE75764.1]
AT4G31390	1.35729	0.440729	up	AT4G31390	uncharacterized aarF domain-containing protein kinase [Source:EMBL;Acc:AEE85904.1]
AT5G03455	-1.07601	-0.105688	down	CDC25	dual specificity phosphatase Cdc25 [Source:EMBL;Acc:AED90607.1]
AT1G09070	1.04228	0.0597432	up	(AT)SRC2	uncharacterized protein [Source:EMBL;Acc:AEE28391.1]
AT2G44410	1.08145	0.11297	up	AT2G44410	RING/U-box domain-containing protein [Source:EMBL;Acc:AEC10417.1]
AT4G29735	-1.05992	-0.0839507	down	AT4G29735	uncharacterized protein [Source:EMBL;Acc:AEE85668.1]
AT5G19350	1.18964	0.25053	up	AT5G19350	RNA recognition motif-containing protein [Source:EMBL;Acc:AED92690.1]
AT3G15730	1.02408	0.034332	up	PLDALPHA1	phospholipase D alpha 1 [Source:EMBL;Acc:AEE75720.1]
AT4G00355	-1.11	-0.150558	down	AT4G00355	uncharacterized protein [Source:EMBL;Acc:AEE81868.1]
AT5G45100	1.11105	0.151923	up	AT5G45100	S-ribonuclease binding protein [Source:EMBL;Acc:AED95202.1]
AT5G20020	-1.00903	-0.012963	down	RAN2	GTP-binding nuclear protein Ran-2 [Source:EMBL;Acc:AED92780.1]
AT5G59613	-1.01861	-0.026598	down	AT5G59613	uncharacterized protein [Source:EMBL;Acc:AED97213.1]
AT3G01050	-1.01952	-0.0278902	down	MUB1	membrane-anchored ubiquitin-fold protein 1 [Source:EMBL;Acc:AEE73600.1]
AT3G08690	-1.20059	-0.263748	down	UBC11	ubiquitin-conjugating enzyme E2 11 [Source:EMBL;Acc:AEE74665.1]
AT3G58470	1.28798	0.365109	up	AT3G58470	nucleic acid binding / methyltransferase [Source:EMBL;Acc:AEE79786.1]
AT5G57035	1.23034	0.299058	up	AT5G57035	U-box domain-containing protein kinase family protein [Source:EMBL;Acc:AED96837.1]
AT4G31300	1.07095	0.0988941	up	PBA1	proteasome subunit beta type-6 [Source:EMBL;Acc:AEE85889.1]
AT3G15355	-1.11384	-0.155547	down	PFU1	putative ubiquitin-conjugating enzyme E2 25 [Source:EMBL;Acc:AEE75657.1]
AT5G57330	-1.07373	-0.102633	down	AT5G57330	glucose-6-phosphate 1-epimerase [Source:EMBL;Acc:AED96885.1]
AT2G43970	1.01326	0.0189988	up	AT2G43970	RNA-binding protein [Source:EMBL;Acc:AEC10356.1]
AT1G78920	-1.29264	-0.370323	down	AtVHP2;1	pyrophosphate-energized membrane proton pump 2 [Source:EMBL;Acc:AEE36178.1]
AT5G65430	-1.05975	-0.0837227	down	GRF8	14-3-3-like protein GF14 kappa [Source:EMBL;Acc:AED98054.1]
AT4G29860	-1.04293	-0.0606375	down	EMB2757	transducin/WD40 domain-containing protein [Source:EMBL;Acc:AEE85686.1]
AT1G13000	-1.14927	-0.200715	down	AT1G13000	uncharacterized protein [Source:EMBL;Acc:AEE28959.1]
AT4G16630	1.78375	0.834917	up	AT4G16630	DEAD-box ATP-dependent RNA helicase 28 [Source:EMBL;Acc:AEE83778.1]
AT2G18240	1.33626	0.418199	up	AT2G18240	Rer1-like protein [Source:EMBL;Acc:AEC06744.1]
AT5G52200	1.14726	0.198192	up	AT5G52200	phosphoprotein phosphatase inhibitor [Source:EMBL;Acc:AED96183.1]
AT1G20780	1.04018	0.0568345	up	PUB44	U-box domain-containing protein 44 [Source:EMBL;Acc:AEE30021.1]
AT1G11475	1.14144	0.190859	up	NRPE10	DNA-directed RNA Polymerase II subunit L [Source:EMBL;Acc:AEE28741.1]
AT3G15810	-1.03118	-0.0442931	down	AT3G15810	protein LURP-one-related 12 [Source:EMBL;Acc:AEE75729.1]
AT1G69250	1.17001	0.226519	up	AT1G69250	nuclear transport factor 2 and RNA recognition motif-containing protein [Source:EMBL;Acc:AEE34901.1]
AT4G23460	-1.05695	-0.0799081	down	AT4G23460	beta-adaptin-like protein C [Source:EMBL;Acc:AEE84761.1]
AT1G15750	1.33833	0.420438	up	WSIP1	protein TOPLESS [Source:EMBL;Acc:AEE29359.1]
AT1G31020	1.02	0.0285743	up	ATO2	thioredoxin O2 [Source:EMBL;Acc:AEE31307.1]
AT2G19870	1.37616	0.460647	up	AT2G19870	tRNA/rRNA methyltransferase (SpoU)-like protein [Source:EMBL;Acc:AEC06936.1]
AT4G03550	-1.0323	-0.0458616	down	ATGSL05	callose synthase 12 [Source:EMBL;Acc:AEE82336.1]
AT3G21220	-1.05706	-0.080061	down	MAP2K_A	mitogen-activated protein kinase kinase 5 [Source:EMBL;Acc:AEE76478.1]
AT5G55000	1.05133	0.0722141	up	FIP2	potassium channel tetramerisation and pentapeptide repeat-containing protein [Source:EMBL;Acc:AED96568.1]
AT4G02330	1.04165	0.0588754	up	ATPMEPCRB	pectinesterase 41 [Source:EMBL;Acc:AEE82156.1]
AT3G13062	-1.18649	-0.246703	down	AT3G13062	lipid-binding START domain-containing protein [Source:EMBL;Acc:AEE75288.1]
AT3G47830	-1.29354	-0.371327	down	AT3G47830	HhH-GPD base excision DNA repair protein-related protein [Source:EMBL;Acc:AEE78335.1]
AT3G24170	1.28729	0.364337	up	ATGR1	glutathione reductase, cytosolic [Source:EMBL;Acc:AEE76867.1]
AT3G18820	-1.12147	-0.165388	down	RAB7B	Ras-related protein Rab-7A [Source:EMBL;Acc:AEE76152.1]
AT2G01140	-1.11506	-0.157125	down	AT2G01140	fructose-bisphosphate aldolase, class I [Source:EMBL;Acc:AEC05406.1]
AT5G43830	-1.42665	-0.512635	down	AT5G43830	pentatricopeptide repeat-containing protein-like protein [Source:EMBL;Acc:AED95015.1]
AT5G26160	1.63137	0.706081	up	AT5G26160	uncharacterized protein [Source:EMBL;Acc:AED93531.1]
AT2G22425	-1.09066	-0.125205	down	AT2G22425	putative signal peptidase complex subunit 1 [Source:EMBL;Acc:AEC07303.1]
AT1G48550	-1.1906	-0.251688	down	AT1G48550	Vacuolar protein sorting-associated protein 26 [Source:EMBL;Acc:AEE32314.1]
AT2G31350	1.00815	0.0117114	up	GLX2-5	Hydroxyacylglutathione hydrolase 2 [Source:EMBL;Acc:AEC08531.1]
AT4G39140	1.24485	0.315975	up	AT4G39140	RING/U-box domain-containing protein [Source:EMBL;Acc:AEE87026.1]
AT4G24330	-1.07039	-0.0981309	down	AT4G24330	uncharacterized protein [Source:EMBL;Acc:AEE84890.1]
AT3G52850	1.01679	0.0240259	up	ATELP1	vacuolar-sorting receptor 1 [Source:EMBL;Acc:AEE79000.1]
AT1G75270	1.17335	0.230638	up	DHAR2	glutathione S-transferase DHAR2 [Source:EMBL;Acc:AEE35696.1]
AT1G04555	-1.06648	-0.0928553	down	AT1G04555	uncharacterized protein [Source:EMBL;Acc:AEE27714.1]
AT5G06550	1.28625	0.363172	up	AT5G06550	uncharacterized protein [Source:EMBL;Acc:AED91033.1]
AT2G37690	1.45884	0.544824	up	AT2G37690	phosphoribosylaminoimidazole carboxylase [Source:EMBL;Acc:AEC09435.1]
AT4G05160	-1.05475	-0.0768979	down	AT4G05160	4-coumarate--CoA ligase-like 7 [Source:EMBL;Acc:AEE82486.1]
AT2G22660	-1.03862	-0.0546745	down	AT2G22660	uncharacterized protein [Source:EMBL;Acc:AEC07334.1]
AT5G43010	1.04074	0.0576105	up	RPT4A	regulatory particle triple-A ATPase 4A [Source:EMBL;Acc:AED94900.1]
AT5G48540	-1.04685	-0.0660591	down	AT5G48540	cysteine-rich repeat secretory protein 55 [Source:EMBL;Acc:AED95683.1]
AT5G42140	-1.08238	-0.114201	down	AT5G42140	Regulator of chromosome condensation (RCC1) family with FYVE zinc finger domain [Source:EMBL;Acc:AED94772.1]
AT4G26970	-1.04262	-0.0602166	down	ACO2	aconitase 2 [Source:EMBL;Acc:AEE85279.1]
AT2G02050	1.02824	0.0401732	up	AT2G02050	putative NADH-ubiquinone oxidoreductase B18 subunit [Source:EMBL;Acc:AEC05539.1]
AT3G03740	-1.02192	-0.031278	down	ATBPM4	BTB/POZ and M4 domain-containing protein [Source:EMBL;Acc:AEE73980.1]
AT1G02660	1.02985	0.0424325	up	AT1G02660	alpha/beta-hydrolase domain-containing protein [Source:EMBL;Acc:AEE27455.1]
AT1G65980	-1.0762	-0.105948	down	TPX1	peroxiredoxin-2B [Source:EMBL;Acc:AEE34448.1]
AT2G25650	1.13075	0.177284	up	AT2G25650	DNA-binding storekeeper protein-related transcriptional regulator [Source:EMBL;Acc:AEC07730.1]
AT3G26080	1.02262	0.032265	up	AT3G26080	putative plastid-lipid-associated protein 5 [Source:EMBL;Acc:AEE77112.1]
AT1G51710	-1.01769	-0.0252978	down	UBP6	ubiquitin carboxyl-terminal hydrolase 6 [Source:EMBL;Acc:AEE32706.1]
AT5G27920	-1.08646	-0.11963	down	AT5G27920	F-box protein [Source:EMBL;Acc:AED93744.1]
AT4G29960	-1.2878	-0.364912	down	AT4G29960	uncharacterized protein [Source:EMBL;Acc:AEE85702.1]
AT5G45510	-1.09554	-0.131636	down	AT5G45510	leucine-rich repeat-containing protein [Source:EMBL;Acc:AED95263.1]
AT1G31220	-1.23701	-0.306862	down	AT1G31220	phosphoribosylglycinamide formyltransferase [Source:EMBL;Acc:AEE31329.1]
AT5G60160	1.07647	0.106315	up	AT5G60160	aspartyl aminopeptidase [Source:EMBL;Acc:AED97287.1]
AT3G03855	-1.20113	-0.264389	down	AT3G03855	pseudogene.[Source:TAIR;Acc:AT3G03855]
AT5G23760	1.10942	0.149803	up	AT5G23760	putative copper transport protein [Source:EMBL;Acc:AED93209.1]
AT2G35940	1.16031	0.214508	up	EDA29	BEL1-like homeodomain 1 [Source:EMBL;Acc:AEC09181.1]
AT3G52470	-1.05395	-0.0758076	down	AT3G52470	late embryogenesis abundant hydroxyproline-rich glycoprotein [Source:EMBL;Acc:AEE78949.1]
AT1G75200	1.08865	0.122543	up	AT1G75200	tRNA wybutosine-synthesizing protein 1-like protein [Source:EMBL;Acc:AEE35687.1]
AT1G32460	-1.17646	-0.234456	down	AT1G32460	uncharacterized protein [Source:EMBL;Acc:AEE31489.1]
AT4G36720	-1.17823	-0.236621	down	HVA22K	HVA22-like protein k [Source:EMBL;Acc:AEE86693.1]
AT2G41420	-1.05247	-0.07378	down	AT2G41420	proline-rich uncharacterized protein [Source:EMBL;Acc:AEC09972.1]
AT2G19130	-1.49652	-0.581612	down	AT2G19130	S-locus lectin protein kinase-like protein [Source:EMBL;Acc:AEC06850.1]
AT3G17880	-1.0606	-0.0848824	down	ATHIP2	TPR repeat-containing thioredoxin TDX [Source:EMBL;Acc:AEE76020.1]
AT5G22350	1.00276	0.00398318	up	ELM1	uncharacterized protein [Source:EMBL;Acc:AED93015.1]
AT5G66010	1.32107	0.401704	up	AT5G66010	RNA recognition motif-containing protein [Source:EMBL;Acc:AED98141.1]
AT1G64520	-1.07339	-0.102172	down	RPN12a	26S proteasome non-ATPase regulatory subunit RPN12A [Source:EMBL;Acc:AEE34249.1]
AT4G36760	1.05036	0.0708892	up	ATAPP1	aminopeptidase P1 [Source:EMBL;Acc:AEE86698.1]
AT4G18800	-1.22287	-0.290266	down	ATHSGBP	RAB GTPase homolog A1D [Source:EMBL;Acc:AEE84091.1]
AT5G62050	1.04205	0.0594257	up	OXA1AT	mitochondrial inner membrane protein OXA1 [Source:EMBL;Acc:AED97555.1]
AT3G01720	-1.13129	-0.177969	down	AT3G01720	uncharacterized protein [Source:EMBL;Acc:AEE73707.1]
AT3G10525	1.31403	0.394003	up	LGO	loss of giant cells from organs protein [Source:EMBL;Acc:AEE74920.1]
AT4G28450	1.39945	0.484862	up	AT4G28450	WD repeat and SOF domain-containing protein 1 [Source:EMBL;Acc:AEE85488.1]
AT5G47580	-1.18858	-0.249244	down	AT5G47580	uncharacterized protein [Source:EMBL;Acc:AED95534.1]
AT2G27580	-1.04956	-0.0697848	down	AT2G27580	zinc finger A20 and AN1 domain-containing stress-associated protein 3 [Source:EMBL;Acc:AEC08017.1]
AT2G35010	1.0899	0.124201	up	ATO1	thioredoxin O1 [Source:EMBL;Acc:AEC09049.1]
AT1G19240	-1.04682	-0.0660183	down	AT1G19240	uncharacterized protein [Source:EMBL;Acc:AEE29822.1]
AT2G34470	-1.04673	-0.0658954	down	UREG	urease accessory protein [Source:EMBL;Acc:AEC08979.1]
AT1G22280	-1.25646	-0.329367	down	AT1G22280	putative protein phosphatase 2C 9 [Source:EMBL;Acc:AEE30220.1]
AT1G16700	-1.0642	-0.0897697	down	AT1G16700	Alpha-helical ferredoxin [Source:EMBL;Acc:AEE29484.1]
AT3G62460	1.27512	0.350637	up	AT3G62460	Putative endonuclease or glycosyl hydrolase [Source:EMBL;Acc:AEE80355.1]
AT3G07568	-1.00185	-0.0026633	down	AT3G07568	uncharacterized protein [Source:EMBL;Acc:AEE74566.1]
AT2G27730	1.00819	0.0117629	up	AT2G27730	copper ion binding protein [Source:EMBL;Acc:AEC08036.1]
AT1G28580	-1.22424	-0.291883	down	AT1G28580	GDSL esterase/lipase [Source:EMBL;Acc:AEE30997.1]
AT3G15430	1.05774	0.0809828	up	AT3G15430	regulator of chromosome condensation repeat-containing protein [Source:EMBL;Acc:AEE75674.1]
AT1G25211	-1.01517	-0.0217279	down	AT1G25211	F-box protein [Source:EMBL;Acc:AEE30588.1]
AT4G26090	1.06761	0.0943826	up	RPS2	disease resistance protein RPS2 [Source:EMBL;Acc:AEE85156.1]
AT1G10590	-1.11285	-0.15426	down	AT1G10590	replication factor A1 [Source:EMBL;Acc:AEE28605.1]
AT3G49350	1.11833	0.161345	up	AT3G49350	RabGAP/TBC domain-containing protein [Source:EMBL;Acc:AEE78531.1]
AT1G60490	-1.15467	-0.207484	down	PI3K	phosphatidylinositol 3-kinase VPS34 [Source:EMBL;Acc:AEE33693.1]
AT4G03080	1.04418	0.0623767	up	BSL1	serine/threonine-protein phosphatase BSL1 [Source:EMBL;Acc:AEE82268.1]
AT3G15000	1.49151	0.576771	up	AT3G15000	cobalt ion binding protein [Source:EMBL;Acc:AEE75601.1]
AT5G57815	1.05832	0.0817734	up	AT5G57815	cytochrome c oxidase subunit VIb [Source:EMBL;Acc:AED96955.1]
AT1G30630	-1.10888	-0.149107	down	AT1G30630	coatomer subunit epsilon-1 [Source:EMBL;Acc:AEE31254.1]
AT1G56170	1.59633	0.674755	up	NF-YC2	nuclear transcription factor Y subunit C-2 [Source:EMBL;Acc:AEE33354.1]
AT4G15470	-1.04006	-0.0566603	down	AT4G15470	BI1-like protein [Source:EMBL;Acc:AEE83607.1]
AT1G32230	1.02133	0.0304476	up	RCD1	WWE protein-protein interaction domain family protein [Source:EMBL;Acc:AEE31454.1]
AT2G43980	-1.27397	-0.349326	down	AtITPK4	inositol-tetrakisphosphate 1-kinase 4 [Source:EMBL;Acc:AEC10358.1]
AT5G15650	-1.14237	-0.192036	down	RGP2	reversibly glycosylated polypeptide 2 [Source:EMBL;Acc:AED92188.1]
AT5G11500	1.07183	0.100078	up	AT5G11500	uncharacterized protein [Source:EMBL;Acc:AED91688.1]
AT5G18360	1.49477	0.57992	up	AT5G18360	TIR-NBS-LRR class disease resistance protein [Source:EMBL;Acc:AED92543.1]
AT4G23320	-1.34649	-0.429202	down	CRK24	cysteine-rich receptor-like protein kinase 24 [Source:EMBL;Acc:AEE84738.1]
AT1G68100	-1.05009	-0.070508	down	IAR1	IAA-alanine resistance protein 1 [Source:EMBL;Acc:AEE34749.1]
AT4G26095	1.1292	0.175296	up	AT4G26095	other RNA.[Source:TAIR;Acc:AT4G26095]
AT4G04920	-1.09599	-0.13223	down	SFR6	sensitive to freezing 6 protein [Source:EMBL;Acc:AEE82442.1]
AT1G52760	-1.03644	-0.0516319	down	LysoPL2	lysophospholipase 2 [Source:EMBL;Acc:AEE32849.1]
AT4G11740	1.05499	0.0772314	up	SAY1	Ara4-interacting protein [Source:EMBL;Acc:AEE83043.1]
AT1G20225	-1.05864	-0.0822112	down	AT1G20225	TRX domain-containing protein [Source:EMBL;Acc:AEE29952.1]
AT5G10770	-1.27908	-0.355105	down	AT5G10770	aspartyl protease family protein [Source:EMBL;Acc:AED91594.1]
AT3G03490	1.10979	0.150286	up	PEX19-1	peroxin 19-1 [Source:EMBL;Acc:AEE73950.1]
AT4G01370	-1.16648	-0.22216	down	ATMPK4	mitogen-activated protein kinase 4 [Source:EMBL;Acc:AEE82016.1]
AT1G79210	1.00074	0.00106621	up	AT1G79210	proteasome subunit alpha type-2-B [Source:EMBL;Acc:AEE36217.1]
AT3G23580	1.03315	0.0470476	up	RNR2A	Ribonucleoside-diphosphate reductase small chain A [Source:EMBL;Acc:AEE76779.1]
AT2G37540	-1.15452	-0.207296	down	AT2G37540	Rossmann-fold NAD(P)-binding domain-containing protein [Source:EMBL;Acc:AEC09413.1]
AT4G08390	1.04869	0.0685829	up	SAPX	L-ascorbate peroxidase [Source:EMBL;Acc:AEE82636.1]
AT5G54250	1.05551	0.0779336	up	HLM1	cyclic nucleotide-gated ion channel 4 [Source:EMBL;Acc:AED96474.1]
AT4G13360	-1.01105	-0.0158488	down	AT4G13360	3-hydroxyisobutyryl-CoA hydrolase-like protein 3 [Source:EMBL;Acc:AEE83270.1]
AT5G61190	1.2814	0.35772	up	AT5G61190	putative endonuclease or glycosyl hydrolase with C2H2-type zinc finger domain [Source:EMBL;Acc:AED97432.1]
AT5G39510	1.01441	0.0206356	up	ATVTI1A	vesicle transport v-SNARE 11 [Source:EMBL;Acc:AED94442.1]
AT1G12360	1.06861	0.0957406	up	KEU	SNARE-interacting protein KEULE [Source:EMBL;Acc:AEE28870.1]
AT4G31130	-1.28172	-0.358082	down	AT4G31130	uncharacterized protein [Source:EMBL;Acc:AEE85862.1]
AT5G18110	-1.13445	-0.181993	down	NCBP	translation initiation factor eIF-4E [Source:EMBL;Acc:AED92508.1]
AT4G25880	1.0128	0.0183423	up	APUM6	pumilio 6 protein [Source:EMBL;Acc:AEE85129.1]
AT3G53310	-1.07681	-0.106769	down	AT3G53310	B3 domain-containing protein REM20 [Source:EMBL;Acc:AEE79067.1]
AT2G21520	-1.0427	-0.0603262	down	AT2G21520	sec.4-like phosphatidylinositol transfer protein [Source:EMBL;Acc:AEC07189.1]
AT1G33360	1.0027	0.00389353	up	AT1G33360	ATP-dependent Clp protease [Source:EMBL;Acc:AEE31587.1]
AT5G46180	1.05033	0.0708478	up	DELTA-OAT	ornithine-delta-aminotransferase [Source:EMBL;Acc:AED95350.1]
AT1G32700	-1.1923	-0.253741	down	AT1G32700	PLATZ transcription factor domain-containing protein [Source:EMBL;Acc:AEE31519.1]
AT5G53220	1.07209	0.100429	up	AT5G53220	uncharacterized protein [Source:EMBL;Acc:AED96326.1]
AT3G57330	-1.13461	-0.182196	down	ACA11	Ca2+-transporting ATPase [Source:EMBL;Acc:AEE79642.1]
AT1G16000	1.22657	0.294635	up	AT1G16000	uncharacterized protein [Source:EMBL;Acc:AEE29394.1]
AT5G10610	-1.09506	-0.131005	down	CYP81K1	cytochrome P450, family 81, subfamily K, polypeptide 1 [Source:EMBL;Acc:AED91571.1]
AT5G27930	-1.08538	-0.118198	down	AT5G27930	putative protein phosphatase 2C 73 [Source:EMBL;Acc:AED93746.1]
AT4G21470	1.08146	0.112979	up	FMN/FHY	riboflavin kinase [Source:EMBL;Acc:AEE84457.1]
AT5G04920	-1.00224	-0.00322628	down	AT5G04920	vacuolar protein sorting-associated protein 36 [Source:EMBL;Acc:AED90804.1]
AT4G24820	-1.01276	-0.0182861	down	AT4G24820	26S proteasome regulatory subunit N7 [Source:EMBL;Acc:AEE84967.1]
AT1G79610	1.05875	0.0823657	up	ATNHX6	sodium/hydrogen exchanger 6 [Source:EMBL;Acc:AEE36272.1]
AT2G30880	1.04495	0.0634394	up	AT2G30880	Pleckstrin homology (PH) domain-containing protein [Source:EMBL;Acc:AEC08452.1]
AT2G16365	-1.06359	-0.0889375	down	AT2G16365	F-box protein [Source:EMBL;Acc:AEC06485.1]
AT1G08480	-1.06626	-0.0925582	down	AT1G08480	uncharacterized protein [Source:EMBL;Acc:AEE28297.1]
AT5G27760	-1.02995	-0.0425701	down	AT5G27760	Hypoxia-responsive family protein [Source:EMBL;Acc:AED93722.1]
AT1G30960	1.99909	0.999343	up	AT1G30960	GTP-binding protein ERG [Source:EMBL;Acc:AEE31297.1]
AT4G00090	-1.05986	-0.0838763	down	AT4G00090	transducin/WD40 domain-containing protein [Source:EMBL;Acc:AEE81822.1]
AT5G17850	1.03323	0.0471628	up	AT5G17850	Sodium/calcium exchanger family protein [Source:EMBL;Acc:AED92478.1]
AT1G04750	-1.12112	-0.164944	down	ATVAMP721	vesicle-associated membrane protein 721 [Source:EMBL;Acc:AEE27738.1]
AT5G66250	1.08026	0.111384	up	AT5G66250	kinectin-related protein [Source:EMBL;Acc:AED98190.1]
AT1G17290	-1.23688	-0.306702	down	AlaAT1	alanine aminotransferase [Source:EMBL;Acc:AEE29570.1]
AT4G01810	1.02377	0.0338888	up	AT4G01810	sec23/sec24-like transport protein [Source:EMBL;Acc:AEE82080.1]
AT1G07670	1.06625	0.0925442	up	ATECA4	Ca2+-transporting ATPase [Source:EMBL;Acc:AEE28160.1]
AT2G32520	-1.00462	-0.00664361	down	AT2G32520	carboxymethylenebutenolidase [Source:EMBL;Acc:AEC08696.1]
AT1G18260	-1.14883	-0.200164	down	AT1G18260	Hr.3 like protein [Source:EMBL;Acc:AEE29692.1]
AT2G16430	-1.18947	-0.250321	down	PAP10	purple acid phosphatase 10 [Source:EMBL;Acc:AEC06495.1]
AT1G16210	1.15095	0.202823	up	AT1G16210	uncharacterized protein [Source:EMBL;Acc:AEE29419.1]
AT5G14280	-1.04266	-0.0602639	down	AT5G14280	DNA-binding storekeeper protein-like protein [Source:EMBL;Acc:AED92012.1]
AT5G48570	1.20185	0.265259	up	FKBP65	peptidylprolyl isomerase [Source:EMBL;Acc:AED95689.1]
AT5G25120	-1.04037	-0.0570946	down	CYP71B11	cytochrome P450 71B11 [Source:EMBL;Acc:AED93403.1]
AT3G15180	1.0811	0.112495	up	AT3G15180	26S proteasome non-ATPase regulatory subunit 5 [Source:EMBL;Acc:AEE75628.1]
AT3G27380	1.01306	0.0187127	up	SDH2-1	succinate dehydrogenase [ubiquinone] iron-sulfur subunit 1 [Source:EMBL;Acc:AEE77310.1]
AT1G32260	-1.25236	-0.324649	down	AT1G32260	uncharacterized protein [Source:EMBL;Acc:AEE31457.1]
AT5G22950	-1.01476	-0.0211363	down	VPS24.1	vacuolar protein sorting-associated protein 24-1 [Source:EMBL;Acc:AED93100.1]
AT3G54010	1.11798	0.1609	up	PAS1	peptidyl-prolyl isomerase PASTICCINO1 [Source:EMBL;Acc:AEE79175.1]
AT2G30930	1.23489	0.304387	up	AT2G30930	uncharacterized protein [Source:EMBL;Acc:AEC08460.1]
AT3G43670	-1.79235	-0.841856	down	AT3G43670	putative copper amine oxidase [Source:EMBL;Acc:AEE77817.1]
AT1G67250	-1.01359	-0.0194705	down	AT1G67250	proteasome maturation protein [Source:EMBL;Acc:AEE34616.1]
AT2G39840	-1.04451	-0.0628198	down	TOPP4	serine/threonine-protein phosphatase PP1 isozyme 4 [Source:EMBL;Acc:AEC09737.1]
AT1G03860	1.24609	0.317408	up	ATPHB2	prohibitin 2 [Source:EMBL;Acc:AEE27624.1]
AT3G13810	1.26602	0.340299	up	AtIDD11	protein indeterminate(ID)-domain 11 [Source:EMBL;Acc:AEE75420.1]
AT3G42790	-1.19797	-0.260598	down	AL3	protein alfin-like 3 [Source:EMBL;Acc:AEE77752.1]
AT1G56330	-1.0864	-0.119559	down	ATSARA1B	GTP-binding protein SAR1B [Source:EMBL;Acc:AEE33378.1]
AT2G20930	-1.36695	-0.450962	down	AT2G20930	sedlin-N conserved region-containing protein [Source:EMBL;Acc:AEC07099.1]
AT5G40880	1.19905	0.261893	up	AT5G40880	zinc finger CCCH domain-containing protein 59 [Source:EMBL;Acc:AED94611.1]
AT1G22300	-1.03024	-0.0429811	down	14-3-3EPSILON	14-3-3-like protein GF14 epsilon [Source:EMBL;Acc:AEE30227.1]
AT3G17940	1.26822	0.342806	up	AT3G17940	aldose 1-epimerase [Source:EMBL;Acc:AEE76027.1]
AT1G15130	-1.00547	-0.00787194	down	AT1G15130	programmed cell death 6-interacting protein [Source:EMBL;Acc:AEE29270.1]
AT2G26590	1.00534	0.00768948	up	RPN13	regulatory particle non-ATPase 13 [Source:EMBL;Acc:AEC07864.1]
AT5G09330	1.19377	0.255529	up	VNI1	NAC domain containing protein 82 [Source:EMBL;Acc:AED91378.1]
AT1G12710	1.21894	0.285632	up	AtPP2-A12	F-box protein PP2-A12 [Source:EMBL;Acc:AEE28916.1]
AT5G23880	1.11146	0.152456	up	ESP5	cleavage and polyadenylation specificity factor subunit 2 [Source:EMBL;Acc:AED93228.1]
AT2G38000	-1.05414	-0.0760638	down	AT2G38000	chaperone protein dnaJ-like protein [Source:EMBL;Acc:AEC09476.1]
AT1G78570	1.32564	0.406685	up	RHM1	UDP-glucose 4,6-dehydratase [Source:EMBL;Acc:AEE36122.1]
AT5G53400	1.08764	0.121195	up	BOB1	nudC domain-containing protein [Source:EMBL;Acc:AED96348.1]
AT1G79550	1.00146	0.00210157	up	PGK	phosphoglycerate kinase [Source:EMBL;Acc:AEE36263.1]
AT5G41992	1.09614	0.132433	up	CPuORF58	conserved peptide upstream open reading frame 58 [Source:EMBL;Acc:AED94751.1]
AT5G41990	1.09614	0.132433	up	WNK8	serine/threonine-protein kinase WNK8 [Source:EMBL;Acc:AED94750.1]
AT5G67630	1.34687	0.429614	up	AT5G67630	RuvB-like protein 2 [Source:EMBL;Acc:AED98369.1]
AT2G18220	2.3457	1.23002	up	AT2G18220	nucleolar complex protein 2-like protein [Source:EMBL;Acc:AEC06741.1]
AT3G59700	-1.09767	-0.134439	down	ATHLECRK	lectin-receptor kinase [Source:EMBL;Acc:AEE79957.1]
AT5G51290	1.03334	0.0473201	up	AT5G51290	diacylglycerol kinase family protein [Source:EMBL;Acc:AED96062.1]
AT1G15440	1.66294	0.733739	up	PWP2	periodic tryptophan protein 2 [Source:EMBL;Acc:AEE29324.1]
AT2G14720	-1.12052	-0.164164	down	VSR2;1	vacuolar-sorting receptor 4 [Source:EMBL;Acc:AEC06327.1]
AT4G25550	-1.01291	-0.0185092	down	AT4G25550	cleavage/polyadenylation specificity factor [Source:EMBL;Acc:AEE85076.1]
AT2G41945	-1.07546	-0.104957	down	AT2G41945	uncharacterized protein [Source:EMBL;Acc:AEC10052.1]
AT1G05000	-1.99046	-0.993104	down	AT1G05000	putative tyrosine-protein phosphatase [Source:EMBL;Acc:AEE27777.1]
AT1G48160	1.10212	0.140278	up	AT1G48160	signal recognition particle subunit SRP19 [Source:EMBL;Acc:AEE32257.1]
AT1G14200	-1.82356	-0.866761	down	AT1G14200	RING/U-box domain-containing protein [Source:EMBL;Acc:AEE29121.1]
AT4G26070	-1.29793	-0.376217	down	NMAPKK	mitogen-activated protein kinase kinase 1 [Source:EMBL;Acc:AEE85152.1]
AT3G14620	-1.04074	-0.0576096	down	CYP72A8	cytochrome P450, family 72, subfamily A, polypeptide 8 [Source:EMBL;Acc:AEE75548.1]
AT1G51650	1.0566	0.0794306	up	AT1G51650	ATP synthase subunit epsilon [Source:EMBL;Acc:AEE32695.1]
AT4G14716	-1.04385	-0.0619195	down	ARD1	1,2-dihydroxy-3-keto-5-methylthiopentene dioxygenase 2 [Source:EMBL;Acc:AEE83486.1]
AT3G11660	-1.13686	-0.185056	down	NHL1	NDR1/HIN1-Like protein 1 [Source:EMBL;Acc:AEE75080.1]
AT3G06300	1.05893	0.0826038	up	AT-P4H-2	P4H isoform 2 [Source:EMBL;Acc:AEE74370.1]
AT4G35310	-1.0907	-0.125253	down	CPK5	calmodulin-domain protein kinase 5 [Source:EMBL;Acc:AEE86498.1]
AT5G61450	-1.17328	-0.230553	down	AT5G61450	2-phosphoglycerate kinase-related protein [Source:EMBL;Acc:AED97470.1]
AT5G55610	-1.11899	-0.162196	down	AT5G55610	uncharacterized protein [Source:EMBL;Acc:AED96657.1]
AT1G17490	-1.04744	-0.0668631	down	AT1G17490	uncharacterized protein [Source:EMBL;Acc:AEE29598.1]
AT5G67500	1.05547	0.0778796	up	ATVDAC2	voltage dependent anion channel 2 [Source:EMBL;Acc:AED98352.1]
AT2G44520	-1.07814	-0.108548	down	COX10	protoheme IX farnesyltransferase [Source:EMBL;Acc:AEC10432.1]
AT1G01050	1.16891	0.225165	up	AtPPa1	inorganic pyrophosphatase [Source:EMBL;Acc:AEE27222.1]
AT3G61540	-1.08245	-0.114301	down	AT3G61540	peptidase family protein [Source:EMBL;Acc:AEE80220.1]
AT2G19680	-1.00328	-0.00471909	down	AT2G19680	F-type H+-transporting ATPase subunit g [Source:EMBL;Acc:AEC06912.1]
AT1G80460	-1.00811	-0.0116599	down	NHO1	glycerol kinase [Source:EMBL;Acc:AEE36407.1]
AT3G13445	1.12708	0.172588	up	TFIID-1	TATA-box-binding protein 1 [Source:EMBL;Acc:AEE75356.1]
AT5G52820	-1.00235	-0.00338966	down	AT5G52820	Notchless protein-like protein [Source:EMBL;Acc:AED96265.1]
AT1G64750	-1.0221	-0.0315355	down	DSS1(I)	26 proteasome complex subunit DSS1 [Source:EMBL;Acc:AEE34282.1]
AT4G31600	-1.48202	-0.567566	down	AT4G31600	UDP-N-acetylglucosamine (UAA) transporter family protein [Source:EMBL;Acc:AEE85935.1]
AT3G47300	-1.43773	-0.523794	down	SELT	SelT-like protein [Source:EMBL;Acc:AEE78263.1]
AT1G49710	1.06423	0.0898116	up	ATFUT12	putative fucosyltransferase-like protein [Source:EMBL;Acc:AEE32462.1]
AT3G56800	-1.21454	-0.280416	down	CAM3	calmodulin 3 [Source:EMBL;Acc:AEE79567.1]
AT4G21520	1.08309	0.11516	up	AT4G21520	transducin/WD40 domain-containing protein [Source:EMBL;Acc:AEE84462.1]
AT4G20830	-1.03698	-0.0523891	down	AT4G20830	Reticuline oxidase-like protein [Source:EMBL;Acc:AEE84366.1]
AT1G27680	-1.01604	-0.0229613	down	APL2	glucose-1-phosphate adenylyltransferase large subunit 2 [Source:EMBL;Acc:AEE30862.1]
AT1G02270	-1.2084	-0.273103	down	AT1G02270	uncharacterized calcium-binding protein [Source:EMBL;Acc:AEE27408.1]
AT4G12070	-1.12774	-0.17343	down	AT4G12070	uncharacterized protein [Source:EMBL;Acc:AEE83093.1]
AT5G40300	-1.1187	-0.161823	down	AT5G40300	uncharacterized protein [Source:EMBL;Acc:AED94531.1]
AT3G25220	-1.06987	-0.097435	down	FKBP15-1	FK506-binding protein 2-1 [Source:EMBL;Acc:AEE76994.1]
AT1G56190	1.35803	0.441511	up	AT1G56190	phosphoglycerate kinase [Source:EMBL;Acc:AEE33357.1]
AT5G49810	1.08272	0.114654	up	MMT	methionine S-methyltransferase [Source:EMBL;Acc:AED95858.1]
AT1G51790	-1.79877	-0.847008	down	AT1G51790	leucine-rich repeat protein kinase-like protein [Source:EMBL;Acc:AEE32716.1]
AT4G23540	1.24451	0.315576	up	AT4G23540	NUC173 domain-containing protein [Source:EMBL;Acc:AEE84773.1]
AT1G26740	-1.09671	-0.133176	down	AT1G26740	ribosomal L.2-like protein [Source:EMBL;Acc:AEE30726.1]
AT5G65110	1.1033	0.141831	up	ACX2	acyl-coenzyme A oxidase 2 [Source:EMBL;Acc:AED98004.1]
AT2G38710	1.09159	0.126431	up	AT2G38710	AMMECR1 protein [Source:EMBL;Acc:AEC09576.1]
AT2G45140	-1.03472	-0.0492449	down	PVA12	VAP-like protein 12 [Source:EMBL;Acc:AEC10514.1]
AT5G38720	1.33119	0.41272	up	AT5G38720	uncharacterized protein [Source:EMBL;Acc:AED94353.1]
AT3G52880	-1.05755	-0.0807225	down	ATMDAR1	monodehydroascorbate reductase (NADH) [Source:EMBL;Acc:AEE79004.1]
AT1G79050	1.42949	0.515504	up	AT1G79050	DNA repair protein recA-like 1 [Source:EMBL;Acc:AEE36198.1]
AT5G25040	1.11937	0.162689	up	AT5G25040	major facilitator protein [Source:EMBL;Acc:AED93393.1]
AT4G29330	-1.09734	-0.134009	down	DER1	derlin-1 [Source:EMBL;Acc:AEE85618.1]
AT3G28940	-1.30443	-0.38342	down	AT3G28940	AIG2-like protein [Source:EMBL;Acc:AEE77511.1]
AT2G01470	-1.05069	-0.0713402	down	STL2P	prolactin regulatory element-binding protein [Source:EMBL;Acc:AEC05458.1]
AT3G51340	-1.49091	-0.576198	down	AT3G51340	aspartyl protease family protein [Source:EMBL;Acc:AEE78781.1]
AT3G27430	1.13002	0.176343	up	PBB1	proteasome subunit beta type-7-A [Source:EMBL;Acc:AEE77318.1]
AT2G39740	1.15656	0.20984	up	AT2G39740	Nucleotidyltransferase family protein [Source:EMBL;Acc:AEC09717.1]
AT3G62830	-1.14853	-0.199783	down	UXS2	UDP-glucuronic acid decarboxylase [Source:EMBL;Acc:AEE80399.1]
AT5G11110	1.81614	0.860876	up	ATSPS2F	sucrose phosphate synthase 2F [Source:EMBL;Acc:AED91636.1]
AT5G09600	1.03152	0.0447737	up	SDH3-1	succinate dehydrogenase 3-1 [Source:EMBL;Acc:AED91415.1]
[truncated: 2,367 more rows]
