# Supplementary material for: Ubiquitome profiling reveals a regulatory pattern of UPL3 with UBP12 on metabolic-leaf senescence
Source: Life Sci Alliance. 2022 Aug 4;5(12):e202201492. doi: 10.26508/lsa.202201492 (PMC9354775; doi:10.26508/lsa.202201492)
Supplement: Supplementary file 14 [file LSA-2022-01492_TableS7.xlsx]

## Sheet: Sheet1
	Table in the Fig 5E
	Protein accession	Gene name	Protein description	upl3/WT
	P42763	ERD14	Dehydrin ERD14	3.9
	Q9S9K7	At1g54690	Probable histone H2AXb	3.846
	Q6EVK6	BRAMA	Chromatin remodeling ATPase	3.6
	Q2V3E2	SWIS3C	Chromatin remodeling ATPase	3.5
	Q9LR30	GGAT1	Glutamate--glyoxylate aminotransferase 1	3.4
	Q9SJL8	METK3	S-adenosylmethionine synthase 3	3.1
	Q9LYG3	NADP-ME2	NADP-dependent malic enzyme 2	3
	Q93VB8	RPS2B	40S ribosomal protein S2-2	2.8
	P25858	GAPC1	Glyceraldehyde-3-phosphate dehydrogenase GAPC1	2.6
	P42731	PAB2	Polyadenylate-binding protein 2	2.6
	O48963	PHOT1	Phototropin-1	2.1
	A0A1I9LQB3	CA1	Carbonic anhydrase	1.716
	O65581	FBA5	Fructose-bisphosphate aldolase 5, cytosolic	1.596
	Q8RXD9	DPE2	4-alpha-glucanotransferase DPE2	1.587
	Q93VR3	At5g28840	GDP-mannose 3,5-epimerase	1.485
	Q9FPT1	UBP12	ubiquitin-specific protease 12	1
	AT4G39910	UBP3	ubiquitin-specific protease 3	1
	AT3G11910	UBP13	ubiquitin-specific protease 13	1
	Q9XIE2	ABCG36	ABC transporter G family member 36	0.56
	Q9SRV5	MS2	homocysteine methyltransferase 2	0.63
	Q9M1X3	F16M2_10	AT3g63160/F16M2_10	0.61
	Q5GM68	PPC2	Phosphoenolpyruvate carboxylase 2	0.25
	Q9ASR1	LOS1	Elongation factor 2	0.21
